# Supplementary material for: Identification of quantitative trait loci of agronomic traits in bread wheat using a Pamyati Azieva × Paragon mapping population harvested in three regions of Kazakhstan
Source: PeerJ. 2022 Nov 9;10:e14324. doi: 10.7717/peerj.14324 (PMC9653069; doi:10.7717/peerj.14324)
Supplement: Supplemental Information 1 [file peerj-10-14324-s001.xlsx]

## Sheet:  KRIAPI (average data)
The raw field data in Kazakh Research Institute of Agriculture and Plant Industry (KRIAPI, Almaty, Southeast Kazakhstan)
RIL	Heading date (HD, days),	Seed maturation days (SMD, days)	Plant height (PH, cm)	Spike length (SL, cm)	Number of productive spikes (NPS, pcs)	Number of kernels per spike (NKS, pcs),	Thousand kernel weight (TKW, g),	Yield per square meter (YM2, g/m2).
PAxP-01	61.8333	35	99.2556	11.7694	5.30556	54.6056	27.4028	738.806
PAxP-02	60.5	36.3333	83.9074	9.65278	4.21111	46.3667	27.6514	538.39
PAxP-03	61.5	35.3333	104.822	11.3361	4.27778	53.2333	31.6778	621.701
PAxP-04	60.5	36.3333	95.5389	11.5556	4.11667	56.2111	25.9056	555.904
PAxP-05	61.1667	35.6667	105.089	12.2889	3.96667	48.9056	31.5972	757.627
PAxP-06	58.8333	38	98.1611	10.0083	4.23889	45.1833	33.3833	656.787
PAxP-07	58.6667	34.5	91.2222	10.825	3.74444	51.1889	31.55	668.37
PAxP-08	57.1667	36	91.0278	11.4333	3.90556	50.3333	30.8406	476.815
PAxP-09	59.5	36	82.9833	10.4361	4	55.4556	25.9694	539.764
PAxP-10	60.5	33.6667	89.7097	10.7958	3.83056	51.1194	31.8542	647.651
PAxP-11	60.1667	35.3333	84.3993	10.6354	3.45833	58.75	32.7611	759.604
PAxP-12	60.6667	34.8333	97.2143	10.6181	3.91865	48.7222	32.9052	585.074
PAxP-13	60.5	35	95.2222	11.2222	3.08333	52.0833	29.8917	539.401
PAxP-14	61.8333	33.6667	94.7569	12.3264	3.56944	50.6667	30.3572	703.242
PAxP-15	60.8333	34.6667	83.9537	12.0435	3.31481	54.5926	29.4519	519.092
PAxP-16	61.5	34	99.9772	11.8462	3.9504	60.4603	30.3946	677.956
PAxP-17	59.5	36	89.7861	10.3833	4.40556	48.4611	28.0056	550.483
PAxP-18	60	35	99.5278	12.4972	3.96111	57.9667	30.295	747.594
PAxP-19	60.1667	34	89.4611	11.5278	3.86111	45.4667	33.5	460.877
PAxP-20	61.8333	33.6667	93.5861	10.3917	3.73333	53.3278	30.9706	660.95
PAxP-21	60	31.3333	87.4833	10.0806	4.17222	53.65	30.9222	881.886
PAxP-22	61.8333	33.6667	84.2653	12.0417	4.28333	53.0417	22.4236	494.574
PAxP-23	61.8333	33.6667	97.3194	9.91944	3.67778	47.15	30.0611	497.774
PAxP-24	61.8333	33.6667	90.8694	9.89722	3.72222	53.8722	33.9533	550.674
PAxP-25	59.8333	35.6667	100.45	10.6389	4.15	57.3333	32.3417	626.061
PAxP-26	61.5	34	99.1222	12.6222	4.41667	59.6944	31.425	400.778
PAxP-27	61.3333	32.8333	84.6056	12.2917	3.43889	49.7833	29.2222	588.663
PAxP-28	61.8333	33.6667	98.1639	10.4222	4.37222	49.2111	32.79	460.895
PAxP-29	61.8333	33.6667	95.5486	10.1458	3.51389	44.4722	35.2403	353.811
PAxP-30	59.8333	34.6667	92.6944	9.92778	3.76667	44.3056	33.4317	566.151
PAxP-31	60.1667	34.3333	93.0778	10.4867	4.5	49.2167	32.6106	622.879
PAxP-32	61.8333	33.6667	100.844	11.9444	3.33889	45.1111	32.6556	439.569
PAxP-33	57.8333	34.3333	90.7056	10.5444	3.2	54.7333	31.9778	551.851
PAxP-34	60.5	35	80.8556	9.56111	3.9	42.8	28.8861	442.917
PAxP-35	60.1667	35.3333	79.8361	9.57778	4.80556	43.2722	27.4878	745.03
PAxP-36	58	35.1667	91.5333	10.8389	4.12222	54.0111	31.2606	667.457
PAxP-37	59.1667	36.3333	96.5308	11.9389	3.41667	51.55	31.5333	541.638
PAxP-38	58.8333	36.6667	99.5639	11.0111	3.52778	45.6111	28.8789	503.124
PAxP-39	60.1667	35.3333	90.463	11.6713	2.91667	53.4815	27.4689	309.759
PAxP-40	61.8333	33.6667	93.5597	9.66667	3.54167	45.1889	29.8378	441.816
PAxP-41	59.8333	35.6667	80.2444	10.1667	4.02222	43.45	27.6836	471.361
PAxP-42	60	35.5	79.8833	10.4167	3.51111	50.5944	27.1406	503.274
PAxP-43	57.3333	34	97.2389	9.17111	4.03889	45.2111	30.9222	542.757
PAxP-44	61.3333	34.1667	86.7556	10.9028	3.40556	47.4833	30.7203	433.808
PAxP-45	59	36.5	87.2667	10.5639	3.47778	51.7667	31.4681	515.154
PAxP-46	61.6667	33.8333	94.5667	10.3917	4.05556	54.2944	30.3011	592.59
PAxP-47	59.3333	36.1667	94.3722	11.0944	3.37222	51.6833	27.8222	471.315
PAxP-48	61.8333	33.6667	91.8889	9.94444	3.47222	43.3056	32.3733	401.293
PAxP-49	61.8333	33.6667	104.911	11.4917	3.39444	51.2222	28.8625	470.097
PAxP-50	61.8333	33.6667	96.6972	12.2417	2.92778	54.6333	31.2139	464.667
PAxP-51	61.8333	35	61.6944	8.66667	2.77778	40.8889	29.0253	447.247
PAxP-52	59.8333	34.6667	104.017	12.1356	3.38889	53.1278	36.175	622.009
PAxP-53	59.8333	37	93.7944	11.5444	3.48333	50.5667	27.8703	458.187
PAxP-54	59.8333	37	106.903	11.6444	3.53889	48.7111	35.2911	580.874
PAxP-55	59.1667	36.6667	94.5611	11.7306	3.56111	48.6278	29.3556	500.279
PAxP-56	61.8333	35	78.5889	10.0556	3.74444	46.5056	28.7517	505.339
PAxP-57	57.3333	35	88.5778	10.1889	3.48889	42.5611	34.6028	294.524
PAxP-58	59.8333	37	88.0806	9.64444	2.53056	40.4778	29.621	366.476
PAxP-59	58.3333	34	96.3426	10.7176	3.66667	41.9074	35.1787	488.037
PAxP-60	61.8333	35	97.2278	11.5	3.78889	46.1111	31.9233	544.298
PAxP-61	61.8333	35	92.7778	10.4889	4.05556	48.6722	30.5797	485.818
PAxP-62	60.5	36.3333	84.5667	10.3083	3.96667	46.6	27.5797	483.52
PAxP-63	61.8333	35	87.4	10.6444	3.09444	40.7444	31.0203	319.904
PAxP-64	60.5	36.3333	87.3583	11.5167	3.02778	47.1167	28.5442	350.935
PAxP-65	59.3333	36.1667	84.9639	10.2833	2.83889	48.05	28.3725	351.802
PAxP-66	60.5	35	94.2611	9.83056	4.18333	48.5778	29.7278	503.572
PAxP-67	59.8333	37	92.9806	10.6917	2.97222	49.8611	29.8261	484.392
PAxP-68	60.5	36.3333	80.8833	10.5361	3.45556	54.0556	24.8489	515.761
PAxP-69	61.8333	35	85.1889	10.6583	4.37778	48.3167	27.3439	486.906
PAxP-70	61.6667	33.8333	99.1603	13.6356	3.29382	51.1527	32.9308	431.373
PAxP-71	66	30.8333	89.5278	9.83333	2.91667	47.4444	30.5042	570.101
PAxP-72	58.8333	38	92.8	11.3889	4.05	42.1611	28.8806	480.005
PAxP-73	61.5	35.3333	100.753	12.3417	3.67222	51.2	31.9278	344.531
PAxP-74	57.5	33.8333	80.5211	10.8906	3.75556	41.7389	31.7667	340.109
PAxP-75	64.8333	32	91.555	11.025	3.54444	45.1667	29.8733	417.754
PAxP-76	59.6667	35.8333	86.9194	9.58333	3.42778	45.5833	29.26	389.849
PAxP-77	60.5	36.3333	89.1667	9.99074	2.88889	46.1296	27.1546	376.822
PAxP-78	59.8333	37	91.375	11.6639	4.13889	46.0667	32.3972	506.498
PAxP-79	60.5	35	93.025	10.9694	3.58889	50.1222	29.5283	491.108
PAxP-80	58.6667	34	88.13	11.3439	4.26111	49.7278	29.7073	605.444
PAxP-81	60.5	35	97.5694	12.6944	3.01667	58.7333	29.2389	716.701
PAxP-82	60.5	35	99.1833	12.325	3.11111	52.7833	26.8361	382.407
PAxP-83	59.6667	34.5	87.5611	12.0722	3.17222	59.4556	27.2056	550.609
PAxP-84	61.8333	33.6667	97.0333	11.0333	3.97222	59.2833	26.9719	629.182
PAxP-85	60.1667	35.3333	98.0833	11.4639	3.62778	49.1278	30.4467	489.531
PAxP-86	62.5	14.3333	98.2639	13.4611	3.73889	52	29.6878	552.854
PAxP-87	61	34.5	89.4292	11.1472	3.39722	44.9917	33.48	511.973
PAxP-88	61.8333	35	96.213	11.8287	3.36111	51.9444	33.5652	460.272
PAxP-89	61.1667	15	76.3444	10.0722	3.76111	43.6333	28.785	432.459
PAxP-90	60.6667	33.8333	80.3278	9.425	3.34444	42.6278	32.5767	340.261
PAxP-91	59.3333	34.8333	102.336	11.825	3.17778	47.4167	32.9561	593.584
PAxP-92	60	34.1667	96.2528	13.8	3.58889	48.35	27.9639	510.519
PAxP-93	60.1667	35.3333	88.1333	11.0167	3.40833	42.0639	27.8447	549.307
PAxP-94	60.1667	35.3333	103.578	10.9889	2.95556	48.5556	30.2667	436.418

## Sheet: NKAES (average data)
The raw field data in North Kazakhstan Agricultural Experimental Station (NKAES, Petropavlovsk, North Kazakhstan)
RIL	Heading date (HD, days),	Seed maturation days (SMD, days)	Plant height (PH, cm)	Spike length (SL, cm)	Number of productive spikes (NPS, pcs)	Number of kernels per spike (NKS, pcs),	Thousand kernel weight (TKW, g),	Yield per square meter (YM2, g/m2).
PAxP-01	41.8333	45.3333	77	10.175	2.65	41.315	34.35	301.15
PAxP-02	44.5	44.1667	70.5	9.15	2.2125	31.71	31.1333	208.1
PAxP-03	44.3333	44	78.75	9.3	2.3	33.44	34.95	200.95
PAxP-04	43.1667	45.3333	79.75	10.375	2.43	41.135	28.4333	251.967
PAxP-05	45.1667	43.6667	89.75	10.7	2.335	35.83	40.1167	305.3
PAxP-06	40.6667	46.1667	75.75	8.575	2.4225	33.395	35.8667	197.767
PAxP-07	39.75	48	71	9	2.3	34.56	30.2	171.075
PAxP-08	40	44.6667	73.5	8.9	2.5575	32.78	36.9833	259.383
PAxP-09	40.8333	42.3333	67.25	7.95	2.2075	38.885	29.9167	227.15
PAxP-10	39.3333	43.6667	67.75	8.75	2.405	32.195	34.8667	219.183
PAxP-11	41	42.5	70.5	9.3	2.4275	43.745	34.5833	216.1
PAxP-12	40.6667	43	71.5	9.35	2.63	34.485	37.1667	249.117
PAxP-13	41	43.6667	82.25	9.325	2.17	28.76	39.6333	147.333
PAxP-14	41.3333	45.6667	79.75	9.875	2.51	34.87	35.2667	262
PAxP-15	41.6667	45.3333	71.25	9.75	2.245	33.81	36.4	184.733
PAxP-16	42.8333	43.5	78.5	9.575	2.25	36.53	34.9333	212.133
PAxP-17	41.5	43.8333	76.25	9.625	2.3225	38.33	34.2167	272.617
PAxP-18	41.6667	44	81.25	10.7	1.8125	35.755	35.4167	258.367
PAxP-19	41.5	44.8333	79.75	9.9	2.1775	33.75	38.9167	269.55
PAxP-20	41	44.6667	78	8.95	2.5175	35.55	36.8333	281.233
PAxP-21	40.5	46.25	68.5	8.85	2.4	33.1	31.1	189.975
PAxP-22	44.8333	45.1667	72	9.575	2.285	38.485	30.8	217.017
PAxP-23	44.3333	42.6667	80	8.7	2.395	32.435	39.0333	254.35
PAxP-24	43	43.6667	73.25	7.95	2.18	37.82	35.5167	213.233
PAxP-25	42.3333	44.3333	81	8.825	2.075	36.76	34.6333	244.767
PAxP-26	41.1667	44.5	79.5	10.025	2.185	36.635	36.6333	274.017
PAxP-27	40.3333	44.6667	68.25	10.425	2.2975	37.325	36.15	255.083
PAxP-28	39.5	45.8333	76.75	9.05	2.68	34.66	35.1833	285.3
PAxP-29	42.5	41.1667	81.25	9.475	2.37	36.56	42.4667	271.467
PAxP-30	40.5	45	73.5	9.2	2.3775	36.27	37.8833	254.417
PAxP-31	40.8333	44.5	76.5	9.35	2.5725	33.915	35.6167	202.9
PAxP-32	44.3333	38.5	89.25	10.4	2	36.15	40.3333	227.867
PAxP-33	39	45.3333	73	9.55	2.4075	38.56	36.6833	277.2
PAxP-34	42.25	45	80	9.5	1.95	32.04	34.65	162.275
PAxP-35	42.25	45.25	74.5	8.65	2.45	28.22	33.5	157.25
PAxP-36	40.1667	44.5	77.25	9.675	2.4675	33.525	35.75	251.533
PAxP-37	45	42	80	9.825	2.4125	37.535	37.45	213.95
PAxP-38	44.8333	43.6667	85	9.3	2.3675	33.88	37.2833	215.933
PAxP-39	44.1667	43.3333	74	9.75	2.0775	40.355	32.8667	211.133
PAxP-40	42.75	44.5	78	7.75	3.75	34.44	31.15	164.85
PAxP-41	43.6667	43.1667	73.25	9.4	2.0175	35.005	35.2167	256.7
PAxP-42	41.5	42.6667	69.5	8.95	1.6975	28.775	33.6333	140.4
PAxP-43	41.1667	45.3333	68.5	8.525	2.0925	28.205	33.5	178.633
PAxP-44	44	43.6667	75.75	10.475	2.0525	31.98	36.2667	198.35
PAxP-45	41.25	46	66	9.6	2	32.84	32.95	136.65
PAxP-46	42.5	46.5	73.25	9.625	2.2775	36.75	34.2333	210.933
PAxP-47	41.6667	47	70.75	9.675	2.255	32.405	34.4167	193.8
PAxP-48	43	45.5	83	9.525	1.765	40.47	37.7667	182.483
PAxP-49	46.1667	46.3333	87.25	10.45	2.4525	36.865	36.8333	200.317
PAxP-50	41.3333	46.8333	78.25	11.225	2.1475	37.365	35.95	145.233
PAxP-51	43.1667	48.1667	83.75	10.8	1.9175	35.105	36.6167	133.417
PAxP-52	43.3333	46.6667	81.5	10.25	2.145	36.42	39.6833	239.867
PAxP-53	44.3333	48.3333	81.75	9.65	2.9125	28.225	36.8333	215.433
PAxP-54	42.8333	47.5	91.75	10.4	1.555	38.365	40.85	231.317
PAxP-55	42.6667	47	76.75	10.975	2.605	33.035	39	248.033
PAxP-56	41.3333	46.6667	67.5	9.65	2.5475	32.5	33.3	195.85
PAxP-57	40.6667	44.8333	69.75	9.475	2.695	30.87	36.9667	208.95
PAxP-58	42.6667	48	76.25	9.55	2.2825	32.75	38.75	232.767
PAxP-59	42.3333	47.5	70.5	9.55	2.55	31.005	38.65	221.75
PAxP-60	42	46.8333	78	10.225	2.3875	35.41	36.8167	267.6
PAxP-61	42.8333	48.6667	79.5	9.275	2.1325	31.615	37.0667	274.317
PAxP-62	43.8333	48.3333	72	9.05	2.575	37.185	34.5333	233.117
PAxP-63	43.3333	46.6667	74	10.225	2.4625	32.35	37.6333	254.333
PAxP-64	43.5	47.5	73.5	10.55	1.9275	40.78	38.7167	232.783
PAxP-65	41.5	48.3333	72.25	8.975	2.1575	33.25	35.8667	203.45
PAxP-66	42.5	49.25	75.5	7.9	2.8	27.64	32.05	203.25
PAxP-67	44.8333	46.1667	76.25	10.15	2.4025	35.025	36.7	268.133
PAxP-68	43.8333	46.3333	73.25	9.6	3.0075	34.79	32.0167	270.8
PAxP-69	43.1667	46.6667	67.5	9.025	3.025	34.205	33.7667	174.683
PAxP-70	40.8333	45	78.25	11.275	2.82	37.545	39.8333	277.817
PAxP-71	44	43.6667	85	8.35	2.4875	32.89	35.5333	229.017
PAxP-72	44.5	45	81.75	9.825	2.86	31.815	37.8167	278.35
PAxP-73	44.1667	44	85	10.675	3.44	33.575	36.6833	310.633
PAxP-74	40.6667	45.8333	70.25	9.6	2.6275	30.475	37.3	196.483
PAxP-75	43.5	45.8333	73.5	10.025	2.44	32.52	34.9167	180.55
PAxP-76	42	45.5	67.25	8.975	2.6875	36.26	36.2667	218.317
PAxP-77	43.8333	45.1667	80	9.8	2.86	38.005	34.2333	277.65
PAxP-78	42.6667	44.6667	79	9.55	2.655	32.435	39.4	257.9
PAxP-79	43	40	NA	NA	NA	NA	38.8	236
PAxP-80	39.3333	46.6667	75.5	10.175	1.7075	40.855	35.5333	281.167
PAxP-81	42.1667	45	81.25	10.525	2.6425	40.515	34.55	268.2
PAxP-82	40.8333	45.1667	77.75	10.55	2.67	41.4	33.6167	214.817
PAxP-83	41	44.9167	81	9.225	2.2125	36.1	37.2833	233.208
PAxP-84	41.5	45	80.5	9.975	2.5025	43.515	32.8667	238.95
PAxP-85	41.8333	45.3333	78.5	10.05	2.39	34.72	35.8667	207.583
PAxP-86	42.3333	46	75	12.4	2.2	38.54	32.5667	236.05
PAxP-87	41.5	45	66.5	10.025	2.1375	29.41	36.65	175.183
PAxP-88	41	43	NA	NA	NA	NA	39.6	248.4
PAxP-89	42.3333	45.1667	61.5	8.875	2.305	32.045	31.0167	208.117
PAxP-90	41.3333	45.1667	68.5	8.15	2.125	27.66	36.4667	178.883
PAxP-91	41.3333	44.3333	85.25	10.475	2.42	32.065	37.05	267.6
PAxP-92	41.5	46	83.25	10.1	2.4675	30.67	33.3333	221.033
PAxP-93	43.6667	45.5	81.5	10.1	2.3025	31.84	36.1333	220.767
PAxP-94	42.1667	46.5	83.25	9.475	2.1925	33.69	35.9667	233.933

## Sheet: RPCGF (average data)
The raw field data in A.I. Barayev Research and Production Centre for Grain Farming (RPCGF, Shortandy, North Kazakhstan)
RIL	Heading date (HD, days),	Seed maturation days (SMD, days)	Plant height (PH, cm)	Spike length (SL, cm)	Number of productive spikes (NPS, pcs)	Number of kernels per spike (NKS, pcs),	Thousand kernel weight (TKW, g),	Yield per square meter (YM2, g/m2).
PAxP-01	44.3333	57.3333	60.6667	1.11966	8.53333	39.5333	32.9712	303.84
PAxP-02	45	56	51.3333	2.32581	8.6	37.2333	30.0321	226.667
PAxP-03	43	58.3333	54	1.49487	9.13333	33.3333	30.7304	147.107
PAxP-04	42.6667	57	57.3333	1.90655	9.9	39.5	29.9302	327.633
PAxP-05	44	56	62.3333	2.21977	10.2667	35.4	38.9916	340.46
PAxP-06	42.3333	57	57.3333	1.39412	7.96667	32	34.1995	243.36
PAxP-07	41.6667	57	57.1667	1.75139	8.73333	36.4	34.2998	300.413
PAxP-08	39.6667	55.6667	54.1667	1.77193	9.2	33.7667	33.7768	242.72
PAxP-09	41.3333	57	58	1.15494	9.06667	40.3	34.2276	314.52
PAxP-10	40.6667	55.3333	47.1667	1.5641	9.06667	38.1	36.457	270.453
PAxP-11	41	56	56	1.34336	8.1	37.7	34.4705	297.02
PAxP-12	40.3333	55.6667	51.3333	1.14286	8.5	35.4333	36.0118	285.727
PAxP-13	42	56.3333	59.5	2.17778	8.03333	35.3333	37.054	305.553
PAxP-14	42.3333	55.6667	54.6667	1.95324	9.6	37.5667	34.8595	335.827
PAxP-15	41.3567	56.6433	52.3333	1.10853	9	37.4667	33.8474	243.957
PAxP-16	43	55.3333	63.3333	2.13341	8.13333	30.4333	36.9575	312.447
PAxP-17	41.6667	56	55.3333	1.54907	8.43333	34.8	33.5364	306.867
PAxP-18	43.6667	56.6667	53.6667	2.07051	7.96667	39.9667	35.0437	231.37
PAxP-19	43.3333	56	52.1667	1.4134	9.16667	31.6	44.8846	341.14
PAxP-20	42.3333	55.6667	57.3333	1.79858	8.6	36.5333	34.4383	316.15
PAxP-21	42.3333	55.3333	49	1.70224	8.13333	36.0333	36.1276	306.96
PAxP-22	43	56	59.1667	2.03542	8.33333	36.7667	33.7287	260.297
PAxP-23	45	54.6667	53.5	1.15789	8.33333	32.1	40.603	328.48
PAxP-24	43.6667	55	55.5	2.38571	8.26667	34.8	34.7707	279.417
PAxP-25	44.6667	55.3333	52.6667	2.36032	8.56667	39.7667	37.5657	168.273
PAxP-26	42	55.3333	60.1667	1.54603	9.8	36.6667	37.0049	277.76
PAxP-27	41.3333	54.6667	50.1667	2.55929	10.5667	41.2667	36.5321	333.697
PAxP-28	39.6667	55.3333	60.1667	2.86389	8.66667	34.7667	37.2947	326.09
PAxP-29	41.6667	54.6667	58.1667	1.53472	8.33333	35.3667	40.4113	386.027
PAxP-30	43.6667	54.3333	54.1667	1.68333	8.86667	32.2667	33.9305	158.27
PAxP-31	41.6667	56	55.5	1.75	9.1	37.8	36.8914	271.713
PAxP-32	45	57	60.6667	1.57647	9.53333	35.4667	37.235	234.83
PAxP-33	40.6667	56	51.5	1.79551	8.9	38.1667	33.2115	272.547
PAxP-34	41.3333	56.6667	50.1667	1.15686	8.33333	29.4	37.2067	232.8
PAxP-35	43.6667	57	51.8333	1.20833	8.46667	35.5	33.4085	242.17
PAxP-36	40.6667	56	54.1667	1.72358	9.23333	38.5667	36.8031	264.747
PAxP-37	44.3333	56.3333	56.5	1.09722	8.1	31.2	35.9727	184.867
PAxP-38	45	56.6667	59.3333	1.67419	9.13333	37.1333	36.6336	250.327
PAxP-39	44.6667	57.6667	47	2.37273	10.2667	37.6333	30.5661	186.09
PAxP-40	41	57.3333	65.1667	1.30556	8.6	38.3667	37.4951	395.623
PAxP-41	42.3333	57.6667	58.5	1.23194	8.73333	37.1333	34.2057	295.327
PAxP-42	40.6667	56.6667	54	1.14667	8.3	31.7	32.7477	151.64
PAxP-43	42	56	52	1.99722	8.7	34.1	35.6498	323.667
PAxP-44	42.3333	56	53.3333	1.58333	10.0667	40.4333	35.6227	306.087
PAxP-45	41.6667	56	51.8333	1.66322	9.13333	36.9	36.4036	373.723
PAxP-46	41	57.3333	53.3333	2.15714	8.56667	40.4	36.6578	363.12
PAxP-47	39	56.6667	50	1.40732	9.2	38.4	33.7703	318.273
PAxP-48	51.3333	NA	56.3333	2.24462	9.66667	37.3	41.0182	395.42
PAxP-49	43	55.3333	54.8333	1.08221	8.86667	33	34.9205	251.927
PAxP-50	42.3333	56	52	1.05208	10.1667	36.9	35.6378	214.643
PAxP-51	45.3333	55.6667	44.3333	2.04828	8.9	39	34.692	199.903
PAxP-52	40.3333	56.3333	59.1667	1.14727	9.53333	37.1	41.6405	349.293
PAxP-53	42.6667	56	63.6667	1.54934	9.13333	32.4667	31.3187	271.733
PAxP-54	43	55.6667	63.8333	2.14444	10.2	41.4	39.0447	371.013
PAxP-55	44.3333	57	55.8333	1.45	9.16667	35.1333	32.2479	230.223
PAxP-56	42.3333	56.3333	58	1.68478	9.03333	36.7667	31.5645	315.49
PAxP-57	40	55.3333	51.3333	2.66061	9.06667	32.5667	38.6157	216.933
PAxP-58	42.3333	57.6667	59.6667	1.40278	9.7	41.5667	37.405	359.213
PAxP-59	41.3333	56.6667	59.3333	1.76389	9.03333	35.1	36.5805	405.017
PAxP-60	42.3333	57.3333	57.8333	2.41333	8.6	31.9	30.494	174.387
PAxP-61	42.3333	57.3333	59.3333	1.49206	9.03333	39.9	34.5629	341.04
PAxP-62	42.6667	56.6667	54.6667	1.65917	8.93333	38.7667	31.8742	244.933
PAxP-63	43	56.6667	51.1667	1.04762	8.53333	34.1667	32.2083	189.32
PAxP-64	43.3333	56.3333	53.5	1.17544	9.6	33	32.1017	171.443
PAxP-65	42	57.6667	50.3333	2.05556	9.13333	42.3667	29.1126	94.4933
PAxP-66	44.3333	55.6667	62	1.08081	7.63333	31.0333	31.7552	188.987
PAxP-67	44	56.3333	53.3333	1.675	8.76667	34.8	32.8655	167.953
PAxP-68	43.6667	58	59.3333	1.53333	8.43333	37.7667	31.4307	322.22
PAxP-69	41.3333	55.6667	55.6667	1.08889	8.7	35.3	33.8851	236.627
PAxP-70	37.6667	58.3333	58.5	1.79502	10.1333	37.3	38.9057	404.383
PAxP-71	43	56.6667	61	2.24537	8.83333	38.2667	35.9393	407.36
PAxP-72	NA	NA	50.5	1.55	8.75	29.5	30.2867	73.7
PAxP-73	41.3333	55.6667	65.6667	1.93253	10.2	35.3	36.2443	308.023
PAxP-74	41.6667	58.6667	58.3333	1.28205	9.03333	33.7333	32.7127	186.267
PAxP-75	43.3333	58	58.8333	1.31481	9.86667	35.3667	34.5041	261.62
PAxP-76	42.3333	56.3333	63.3333	1.54052	7.76667	28.9	39.5151	334.44
PAxP-77	42.3333	57	57.5	2.02093	8.8	37.4	37.0525	252.033
PAxP-78	42.3333	56.3333	55.6667	2.02276	9.3	30.5333	34.8511	286.573
PAxP-79	42.3333	56.6667	61.8333	1.96389	8.6	35.2333	37.6961	464.277
PAxP-80	41.3333	56.6667	61.5	2.13333	9.5	39.1	35.1061	313.493
PAxP-81	42	57.3333	58.5	1.63333	8.06667	31.9667	32.3537	194.957
PAxP-82	39.6667	56.3333	55.5	1.78981	9.13333	37.5333	32.3519	325.223
PAxP-83	41	56.3333	54.3333	1.54444	9.73333	40.5667	30.4358	250.48
PAxP-84	42	58	56.3333	1.36364	8.86667	42.5333	27.6547	235.573
PAxP-85	42.3333	58	50.6667	1.49383	8.56667	27.7	32.0053	188.653
PAxP-86	43.6667	57.6667	52.1667	1.44667	10.8333	32.6	30.5631	192.057
PAxP-87	42	58	51	1.81042	9.13333	37.3	34.3505	411.617
PAxP-88	42	56.3333	50.1667	1.75833	9.2	32.0333	38.387	226.4
PAxP-89	41.6667	57.3333	52	1.51176	8.4	34.2333	32.7572	204.933
PAxP-90	43.3333	56.3333	52	2.00833	7.83333	32.6	30.3952	229.62
PAxP-91	44	55.6667	57.3333	2.77273	9.43333	28.2333	25.5922	216.263
PAxP-92	45	55.6667	50	1.94545	8.7	34.4667	26.8457	135.44
PAxP-93	43.3333	57.3333	61.6667	1.35556	9.5	34.4	31.319	147.393
PAxP-94	42	58	56	2.08148	9.13333	41.6667	37.1595	321.207
