# Supplementary material for: Identification of quantitative trait loci of agronomic traits in bread wheat using a Pamyati Azieva × Paragon mapping population harvested in three regions of Kazakhstan
Source: PeerJ. 2022 Nov 9;10:e14324. doi: 10.7717/peerj.14324 (PMC9653069; doi:10.7717/peerj.14324)
Supplement: Supplemental Information 2 [file peerj-10-14324-s002.xlsx]

## Sheet: Table S1 Genetic map
Table S1: The segregation of 4595 polymorphic SNP markers in mapping population Pamyati Azieva x Paragon consisting of 94 recombinant inbred lines
SNP ID	Chromosome	Position, cM	Physical position, bp	PAxP-01	PAxP-02	PAxP-03	PAxP-04	PAxP-05	PAxP-06	PAxP-07	PAxP-08	PAxP-09	PAxP-10	PAxP-11	PAxP-12	PAxP-13	PAxP-14	PAxP-15	PAxP-16	PAxP-17	PAxP-18	PAxP-19	PAxP-20	PAxP-21	PAxP-22	PAxP-23	PAxP-24	PAxP-25	PAxP-26	PAxP-27	PAxP-28	PAxP-29	PAxP-30	PAxP-31	PAxP-32	PAxP-33	PAxP-34	PAxP-35	PAxP-36	PAxP-37	PAxP-38	PAxP-39	PAxP-40	PAxP-41	PAxP-42	PAxP-43	PAxP-44	PAxP-45	PAxP-46
RFL_Contig854_2201	1A	0		A	B	B	A	B	B	B	A	A	A	A	A	A	A	B	B	B	A	B	B	B	H	A	B	B	A	B	A	A	B	B	A	A	B	B	A	B	A	B	B	A	A	A	B	B	B
BobWhite_c39996_85	1A	9.7093		A	B	B	A	B	B	B	B	A	B	B	B	A	A	B	B	B	A	H	H	B	B	B	B	-	A	B	A	A	B	B	A	A	A	B	A	B	A	B	B	A	A	B	B	B	B
Excalibur_c5139_198	1A	9.7093	9110343	A	B	B	A	B	B	B	B	A	B	B	B	A	A	B	B	B	A	H	H	B	B	B	B	H	A	B	A	A	B	B	A	A	A	B	A	B	A	B	B	A	A	B	B	B	B
Excalibur_c71158_54	1A	9.7093	8296948	A	B	B	A	B	B	B	B	A	B	B	B	A	A	B	B	B	A	H	H	B	B	B	B	H	A	B	A	A	B	B	A	A	A	B	A	B	A	B	B	A	A	B	B	B	B
Excalibur_c82557_201	1A	9.7093	9122998	A	B	B	A	B	B	B	B	A	B	B	B	A	A	B	B	B	A	H	H	B	B	B	B	H	A	B	A	A	B	B	A	A	A	B	A	B	A	B	B	A	A	B	B	B	B
Excalibur_c9676_163	1A	9.7093	7510244	A	B	B	A	B	B	B	B	A	B	B	B	A	A	B	B	B	A	-	H	B	B	B	B	H	A	B	A	A	B	B	A	A	A	B	A	B	A	B	B	A	A	B	B	B	B
RAC875_rep_c104335_293	1A	9.7093	9107936	A	B	B	A	B	B	B	B	A	B	B	B	A	A	B	B	B	A	H	H	B	B	B	B	H	A	B	A	A	B	B	A	A	A	B	A	B	A	B	B	A	A	B	B	B	B
RAC875_rep_c72805_651	1A	9.7093	9105169	A	B	B	A	B	B	B	B	A	B	B	B	A	A	B	B	B	A	H	H	B	B	B	B	H	A	B	A	A	B	B	A	A	A	B	A	B	A	B	B	A	A	B	B	B	B
wsnp_Ex_c57982_59470152	1A	9.7093	8329389	A	B	B	A	B	B	B	B	A	B	B	B	A	A	B	B	B	A	H	H	B	B	B	B	H	A	B	A	A	B	B	A	A	A	B	A	B	A	B	B	A	A	B	B	B	B
CAP8_c2448_355	1A	10.2907		A	B	B	A	B	B	B	B	A	B	B	B	A	A	B	B	B	A	H	H	B	B	B	A	H	A	B	A	A	B	B	A	A	A	B	A	B	A	B	B	A	A	B	B	B	B
Kukri_c29150_143	1A	10.2907	10052788	A	B	B	A	B	B	B	B	A	B	B	B	A	A	B	B	B	A	-	A	B	B	B	A	-	A	B	A	A	B	B	A	A	A	B	A	B	A	B	B	A	A	B	B	B	B
Kukri_c29655_239	1A	10.2907	9579907	A	B	B	A	B	B	B	B	A	B	B	B	A	A	B	B	B	A	H	H	B	B	B	A	H	A	B	A	A	B	B	A	A	A	B	A	B	A	B	B	A	A	B	B	B	B
Tdurum_contig46413_680	1A	10.2907	8605832	A	B	B	A	B	B	B	B	A	B	B	B	A	A	B	B	B	A	A	A	B	B	B	A	A	A	B	A	A	B	B	A	A	A	B	A	B	A	B	B	A	A	B	B	B	B
Tdurum_contig68827_61	1A	10.2907	9579689	A	B	B	A	B	B	B	B	A	B	B	B	A	A	B	B	B	A	H	H	B	B	B	A	H	A	B	A	A	B	B	A	A	A	B	A	B	A	B	B	A	A	B	B	B	B
tplb0053o08_2004	1A	10.2907	10048700	A	B	B	A	B	B	B	B	A	B	B	B	A	A	B	B	B	A	H	H	B	B	B	A	H	A	B	A	A	B	B	A	A	A	B	A	B	A	B	B	A	A	B	B	B	B
RAC875_c57939_78	1A	10.8402	11571881	A	B	B	A	B	B	B	B	A	B	B	B	A	A	B	B	B	A	H	A	B	B	B	A	A	A	B	A	A	B	B	A	A	A	B	A	B	A	B	B	A	A	B	B	B	B
RAC875_c34888_65	1A	11.402	12093366	A	B	A	A	B	B	B	H	A	B	B	B	A	A	B	B	B	A	H	A	B	B	B	A	H	A	B	A	A	B	B	A	A	A	B	A	B	A	B	B	A	A	B	B	B	B
Tdurum_contig42479_3800	1A	11.9638		A	B	A	A	B	B	B	B	A	B	B	B	A	A	B	B	B	A	-	A	B	B	B	A	-	A	B	A	A	B	B	A	A	A	B	A	B	A	B	B	A	A	B	B	B	B
Excalibur_c25891_1402	1A	14.4048		A	B	A	A	B	B	B	B	A	B	B	B	-	A	B	B	B	A	B	A	B	B	B	A	-	A	B	A	A	B	B	A	A	A	B	A	A	A	B	B	A	A	B	-	B	B
Kukri_c41943_535	1A	14.4048		A	B	A	A	B	B	B	B	A	B	B	B	A	A	B	B	B	A	B	A	B	B	B	A	-	A	B	A	A	B	B	A	A	A	B	A	A	A	B	B	A	A	B	B	B	B
tplb0043h23_1346	1A	14.4048	10808906	A	B	A	A	B	B	B	B	A	B	B	B	A	A	B	B	B	A	B	A	B	B	B	A	B	A	B	A	A	B	B	A	A	A	B	A	A	A	B	B	A	A	B	B	B	B
wsnp_Ku_c5756_10191339	1A	15.5413		A	B	A	A	B	B	B	A	A	B	B	B	A	A	B	B	B	A	H	A	B	B	B	A	H	A	B	A	A	B	B	A	A	A	B	A	A	A	B	B	A	A	B	H	B	B
Tdurum_contig50845_82	1A	16.1296	14163135	A	B	A	A	B	B	B	B	A	B	B	B	A	A	B	B	B	A	-	A	B	B	B	A	H	A	B	A	A	B	B	A	A	A	B	A	A	A	B	B	A	A	B	H	B	B
Tdurum_contig29484_628	1A	17.3203	20589379	A	B	A	A	B	B	B	B	A	B	B	B	A	A	A	B	B	A	H	A	B	B	A	A	H	A	B	A	A	B	B	A	A	A	B	A	A	A	B	B	A	A	B	-	B	B
BS00065419_51	1A	26.0753		A	B	A	A	B	B	B	B	A	B	B	B	A	B	B	B	B	B	A	B	B	B	A	A	A	A	A	B	B	B	B	A	A	A	B	A	A	A	B	B	A	B	B	B	B	B
BS00078982_51	1A	35.2685	24247379	A	B	A	A	B	B	B	A	A	B	B	B	A	B	B	B	B	B	A	B	B	B	A	B	A	B	A	B	B	A	B	A	A	A	A	A	A	A	B	B	B	B	A	B	B	B
BS00105601_51	1A	35.2685	24321355	A	B	A	A	B	B	B	A	A	B	B	B	A	B	B	B	B	B	A	B	B	B	A	B	A	B	A	B	B	A	B	A	A	A	A	A	A	A	B	B	B	B	A	B	B	B
CAP7_c4833_141	1A	35.2685	25021963	A	B	A	A	B	B	B	A	A	B	B	B	A	B	B	B	B	B	A	B	B	B	A	B	A	B	A	B	B	A	B	A	A	A	A	A	A	A	B	B	B	B	A	B	B	B
Excalibur_c11941_675	1A	35.2685	22884016	A	B	A	A	B	B	B	A	A	B	B	B	A	B	B	B	B	B	A	B	B	B	A	B	A	B	A	B	B	A	B	A	A	A	A	A	A	A	B	B	B	B	A	B	B	B
Kukri_c7436_2259	1A	35.2685	26958877	A	B	A	A	B	B	B	A	A	B	B	B	A	B	B	B	B	B	A	B	B	B	A	B	A	B	A	B	B	A	B	A	A	A	A	A	A	A	B	B	B	B	A	B	B	B
RAC875_c1825_188	1A	35.2685	25541241	A	B	A	A	B	B	B	-	A	B	B	B	A	B	B	B	B	B	A	B	B	B	A	B	A	B	A	B	B	A	B	A	A	A	A	A	A	A	B	B	B	B	A	B	B	B
RAC875_c8245_272	1A	35.2685	26961620	A	B	A	A	B	B	B	A	A	B	B	B	A	B	B	B	B	B	A	B	B	B	A	B	A	B	A	B	B	A	B	A	A	A	A	A	A	A	B	B	B	B	A	B	B	B
Excalibur_c10689_254	1A	36.405	26296910	A	B	A	A	B	B	A	A	A	B	B	B	A	B	B	B	B	B	A	B	B	B	A	B	A	B	A	B	B	A	B	A	A	A	A	A	A	A	B	B	B	B	A	B	B	B
Excalibur_c7026_2635	1A	36.405		A	B	A	A	B	B	A	A	A	B	B	B	A	B	B	B	B	B	A	B	B	B	A	B	A	B	A	B	B	A	B	A	A	A	A	A	A	A	B	B	B	B	A	B	B	B
RAC875_c14926_589	1A	36.405	28623752	A	B	A	A	B	B	A	A	A	B	B	B	A	B	B	B	B	B	A	B	B	B	A	B	A	B	A	B	B	A	B	A	A	A	A	A	A	A	B	B	B	B	A	B	B	B
wsnp_BF484606A_Ta_2_3	1A	36.405	27755795	A	B	A	A	B	B	A	-	A	B	B	B	A	B	B	B	B	B	A	B	B	B	A	B	A	B	A	B	B	A	B	A	A	A	A	A	A	A	B	B	B	B	A	B	B	B
Kukri_c12534_559	1A	36.9668	29191223	A	B	A	A	B	B	A	A	A	B	B	B	A	B	B	B	B	B	A	B	B	B	A	B	A	B	A	B	B	A	B	A	A	A	A	A	A	A	B	A	B	B	A	B	B	B
Kukri_c22508_119	1A	36.9668	28350903	A	B	A	A	B	B	A	A	A	B	B	B	A	B	B	B	B	B	A	B	B	B	A	B	A	B	A	B	B	A	B	A	A	A	A	A	A	A	B	A	B	B	A	B	B	B
Kukri_c31964_56	1A	37.5163		A	B	A	A	B	B	A	A	A	B	B	B	B	B	B	B	B	B	A	B	B	B	A	B	A	B	A	B	B	A	B	A	A	A	A	A	A	A	B	A	B	B	A	B	B	B
Tdurum_contig8382_300	1A	37.5163	29611921	A	B	A	A	B	B	A	A	A	B	B	B	B	B	B	B	B	B	A	B	B	B	A	B	A	B	A	B	B	A	B	A	A	A	A	A	A	A	B	A	B	B	A	B	B	B
BS00084022_51	1A	38.6659	31374656	A	B	A	A	B	B	A	A	A	B	B	B	B	B	B	B	B	B	A	B	B	B	A	B	A	B	A	B	B	-	B	A	A	A	A	A	A	A	B	A	B	B	A	B	B	B
GENE-0002_856	1A	38.6659	32087536	A	B	A	A	B	B	A	A	A	B	B	B	B	B	B	B	B	B	A	B	B	B	A	B	A	B	A	B	B	A	B	A	A	A	A	A	A	A	B	A	-	B	A	B	B	B
Kukri_c82555_88	1A	39.2407	33375691	A	B	A	A	B	B	A	H	A	B	B	B	B	B	B	B	B	B	A	B	B	B	A	B	A	B	A	B	B	A	B	A	A	A	A	A	A	A	B	A	B	B	A	B	B	B
Tdurum_contig13946_241	1A	39.2407	32965327	A	B	A	A	B	B	A	A	A	B	B	B	B	B	B	B	B	B	A	B	B	B	A	B	A	B	A	B	B	A	B	A	A	A	A	A	A	A	B	A	B	B	A	B	B	B
Tdurum_contig13946_329	1A	39.2407	33372509	A	B	A	A	B	B	A	A	A	B	B	B	B	B	B	B	B	B	A	B	B	B	A	B	A	B	A	B	B	A	B	A	A	A	A	A	A	A	B	A	B	B	A	B	B	B
Tdurum_contig77289_179	1A	39.2407	33373162	A	B	A	A	B	B	A	A	A	B	B	B	B	B	B	B	B	B	A	B	B	B	A	B	A	B	A	B	B	A	B	A	A	A	A	A	A	A	B	A	B	B	A	B	B	B
BS00067339_51	1A	40.3772		B	B	A	A	B	B	A	-	A	B	B	B	B	B	B	B	B	B	B	B	B	B	A	B	A	B	A	B	B	A	B	A	A	A	A	A	A	A	B	A	B	B	A	B	B	B
Excalibur_c12215_352	1A	40.3772	45726979	B	B	A	A	B	B	A	A	A	B	B	B	B	B	B	B	B	B	B	B	B	B	A	B	A	B	A	B	B	A	B	A	A	A	A	A	A	A	B	A	B	B	A	B	B	B
IAAV5652	1A	40.3772		B	B	A	A	B	B	A	A	A	B	B	B	B	B	B	B	B	B	B	B	B	B	A	B	A	B	A	B	B	A	B	A	A	A	A	A	A	A	B	A	B	B	A	B	B	B
Kukri_rep_c107771_588	1A	40.3772	68250105	B	B	A	A	B	B	A	A	A	B	B	B	B	B	B	B	B	B	B	B	B	B	A	B	A	B	A	B	B	A	B	A	A	A	A	A	A	A	B	A	B	B	A	B	B	B
Ra_c27593_460	1A	40.3772	45728010	B	B	A	A	B	B	A	-	A	B	B	B	B	B	B	B	B	B	B	B	B	B	A	B	A	B	A	B	B	A	B	A	A	A	A	A	A	A	B	A	B	B	A	B	B	B
RAC875_c89908_105	1A	40.3772	38731840	B	B	A	A	B	B	A	A	A	B	B	B	B	B	B	B	B	B	B	B	B	B	A	B	A	B	A	B	B	A	B	A	A	A	A	A	A	A	B	A	B	B	A	B	B	B
RFL_Contig3232_1224	1A	40.3772	46169575	B	B	A	A	B	B	A	A	A	B	B	B	B	B	B	B	B	B	B	B	B	B	A	B	A	B	A	B	B	A	B	A	A	A	A	A	A	A	B	A	B	B	A	B	B	B
Tdurum_contig5008_556	1A	40.3772	47384253	B	B	A	A	B	B	A	A	A	B	B	B	B	B	B	B	B	B	B	B	B	B	A	B	A	B	A	B	B	A	B	A	A	A	A	A	A	A	B	A	B	B	A	B	B	B
Tdurum_contig5008_635	1A	40.3772	47384174	B	B	A	A	B	B	A	A	A	B	B	B	B	B	B	B	B	B	B	B	B	B	A	B	A	B	A	B	B	A	B	A	A	A	A	A	A	A	B	A	B	B	A	B	B	B
Tdurum_contig9199_714	1A	40.3772	46169664	B	B	A	A	B	B	A	A	A	B	B	B	B	B	B	B	B	B	B	B	B	B	A	B	A	B	A	B	B	A	B	A	A	A	A	A	A	A	B	A	B	B	A	B	B	B
wsnp_BE490041A_Ta_2_1	1A	40.3772	38729513	B	B	A	A	B	B	A	A	A	B	B	B	B	B	B	B	B	B	B	B	B	B	A	B	A	B	A	B	B	A	B	A	A	A	A	A	A	A	B	A	B	B	A	B	B	B
BobWhite_c4646_119	1A	40.9267	49153584	B	B	A	A	B	B	A	A	A	B	B	B	B	B	B	B	B	B	B	B	B	B	A	B	A	B	A	B	B	A	B	A	A	A	A	A	A	A	B	A	B	B	A	B	B	B
IACX5982	1A	40.9267	49153543	B	B	A	A	B	B	A	A	A	B	B	B	B	B	B	B	B	B	B	B	B	B	A	B	A	B	A	B	B	A	B	A	A	A	A	A	A	A	B	A	B	B	A	B	B	B
RAC875_c5544_4156	1A	40.9267	48880639	B	B	A	A	B	B	A	-	A	B	B	B	B	B	B	B	B	B	B	B	B	B	A	B	A	B	A	B	B	A	B	A	A	A	A	A	A	A	B	A	B	B	A	B	B	B
wsnp_Ex_c25628_34888439	1A	42.6319	380973462	B	B	A	A	B	B	A	A	A	B	B	B	B	B	B	B	B	B	B	B	B	B	A	B	A	B	A	B	B	A	B	A	A	A	A	A	A	A	B	A	B	B	A	B	B	B
Kukri_rep_c101946_496	1A	43.1814	338942188	B	B	A	A	B	B	A	B	A	B	B	B	B	B	B	B	B	B	B	B	B	B	A	B	A	B	A	B	B	A	B	A	A	A	A	A	A	A	B	A	B	B	A	B	B	B
BobWhite_c2506_332	1A	43.7309	297745370	B	B	A	A	-	B	A	A	A	B	B	B	B	B	B	B	B	B	B	B	B	B	A	B	A	B	A	B	B	A	-	A	A	A	A	A	A	A	B	A	B	B	A	B	B	B
BS00021730_51	1A	43.7309		B	B	A	A	H	B	A	-	A	B	B	B	B	B	B	B	B	B	B	B	B	B	A	B	A	B	A	B	B	A	H	A	A	A	A	A	A	A	B	A	B	B	A	B	B	B
BS00022201_51	1A	43.7309	298116028	B	B	A	A	H	B	A	A	A	B	B	B	B	B	B	B	B	B	B	B	B	B	A	B	A	B	A	B	B	A	H	A	A	A	A	A	A	A	B	A	B	B	A	B	B	B
BS00065146_51	1A	43.7309		B	B	A	A	H	B	A	A	A	B	B	B	B	B	B	B	B	B	B	B	B	B	A	B	A	B	A	B	B	A	H	A	A	A	A	A	A	A	B	A	B	B	A	B	B	B
BS00068358_51	1A	43.7309		B	B	A	A	H	B	A	A	A	B	B	B	B	B	B	B	B	B	B	B	B	B	A	B	A	B	A	B	B	A	H	A	A	A	A	A	A	A	B	A	B	B	A	B	-	-
BS00094681_51	1A	43.7309	374689384	B	B	A	A	H	B	A	A	A	B	B	B	B	B	B	B	B	B	B	B	B	B	A	B	A	B	A	B	B	A	H	A	A	A	A	A	A	A	B	A	B	B	A	B	B	B
BS00102492_51	1A	43.7309	298116057	B	B	A	A	H	B	A	A	A	B	B	B	B	B	B	B	B	B	B	B	B	B	A	B	A	B	A	B	B	A	H	A	A	A	A	A	A	A	B	A	B	B	A	B	B	B
CAP8_c806_297	1A	43.7309	297380842	B	B	A	A	H	B	A	A	A	B	B	B	B	B	B	B	B	B	B	B	B	B	A	B	A	B	A	B	B	A	H	A	A	A	A	A	A	A	B	A	B	B	A	B	B	B
Ex_c12584_2014	1A	43.7309	435061844	B	B	A	A	H	B	A	A	A	B	B	B	B	B	B	B	B	B	B	B	B	B	A	B	A	B	A	B	B	A	H	A	A	A	A	A	A	A	B	A	B	B	A	B	B	B
Ex_c21450_396	1A	43.7309	224826935	B	B	A	A	H	H	A	A	A	B	B	B	-	-	B	B	B	B	B	B	H	H	A	B	A	B	A	B	B	A	H	A	A	A	A	A	A	A	B	A	B	B	A	B	B	-
Ex_c25689_1606	1A	43.7309	432974917	B	B	A	A	H	B	A	A	A	B	B	B	B	B	B	B	B	B	B	B	B	B	A	B	A	B	A	B	B	A	H	A	A	A	A	A	A	A	B	A	B	B	A	B	B	B
Excalibur_c20133_87	1A	43.7309	298037397	B	B	A	A	H	B	A	A	A	B	B	B	B	B	B	B	B	B	B	B	B	B	A	B	A	B	A	B	B	A	H	A	A	A	A	A	A	A	B	A	B	B	A	B	B	B
Excalibur_c37474_179	1A	43.7309		B	B	A	A	H	B	A	H	A	B	B	B	B	B	B	B	B	B	B	B	B	B	A	B	A	B	A	B	B	A	H	A	A	A	A	A	A	A	B	A	B	B	A	B	B	B
Excalibur_c37474_242	1A	43.7309		B	B	A	A	-	B	A	H	A	B	B	B	B	B	B	B	B	B	B	B	B	B	A	B	A	B	A	B	B	A	H	A	A	A	A	A	A	A	B	A	B	B	A	B	B	B
Excalibur_c57766_92	1A	43.7309		B	B	A	A	H	B	A	A	A	B	B	B	B	B	B	B	B	B	B	B	B	B	A	B	A	B	A	B	B	A	H	A	A	A	A	A	A	A	B	A	B	B	A	B	B	B
Excalibur_rep_c88290_94	1A	43.7309	298108877	B	B	A	A	H	B	A	H	A	B	B	B	B	B	B	B	B	B	B	B	B	B	A	B	A	B	A	B	B	A	H	A	A	A	A	A	A	A	B	A	B	B	A	B	B	B
Excalibur_s107771_77	1A	43.7309	247301156	B	B	A	A	H	B	A	-	A	B	B	B	B	B	B	B	B	B	B	B	B	B	A	B	A	B	A	B	B	A	H	A	A	A	A	A	A	A	B	A	B	B	A	B	B	B
GENE-0075_140	1A	43.7309	304959661	B	B	A	A	-	B	A	A	A	B	B	B	B	B	B	B	B	B	B	B	B	B	A	B	A	B	A	B	B	A	-	A	A	A	A	A	A	A	B	A	B	B	A	B	B	B
GENE-0099_329	1A	43.7309	238069918	B	B	A	A	H	B	A	A	A	-	B	B	B	B	B	B	B	B	B	B	B	B	A	B	A	B	A	B	B	A	H	A	A	A	A	A	A	A	B	A	B	B	A	-	B	B
GENE-0446_243	1A	43.7309	308269723	B	B	A	A	H	B	A	A	A	B	B	B	B	B	B	B	B	B	B	B	B	B	A	B	A	B	A	B	B	A	H	A	A	A	A	A	A	A	B	A	B	B	A	B	B	B
IACX293	1A	43.7309	375468835	B	B	A	A	H	B	A	-	A	B	B	B	B	B	B	B	B	B	B	B	B	B	A	B	A	B	A	B	B	A	H	A	A	A	A	A	A	A	B	A	B	B	A	B	B	B
IACX7921	1A	43.7309		B	B	A	A	H	B	A	A	A	B	B	B	B	B	B	B	B	B	B	B	B	B	A	B	A	B	A	B	B	A	H	A	A	A	A	A	A	A	B	A	B	B	A	B	B	B
Ku_c23960_333	1A	43.7309	438366099	B	B	A	A	H	B	A	A	A	B	B	B	B	B	B	B	B	B	B	B	B	B	A	B	A	B	A	B	B	A	H	A	A	A	A	A	A	A	B	A	B	B	A	B	B	B
Kukri_c12165_1148	1A	43.7309	298693232	B	B	A	A	-	B	A	A	A	B	B	B	B	B	B	B	B	B	B	B	B	B	A	B	A	B	A	B	B	A	-	A	A	A	A	A	A	A	B	A	B	B	A	B	B	B
Kukri_c27717_316	1A	43.7309	238060333	B	B	A	A	H	B	A	H	A	B	B	B	B	B	B	B	B	B	B	B	B	B	A	B	A	B	A	B	B	A	H	A	A	A	A	A	A	A	B	A	B	B	A	B	B	B
Kukri_rep_c115954_137	1A	43.7309	301241161	B	B	A	A	H	B	A	A	A	B	B	B	B	B	B	B	B	B	B	B	B	B	A	B	A	B	A	B	B	A	H	A	A	A	A	A	A	A	B	A	B	B	A	B	B	B
Ra_c69908_1877	1A	43.7309		B	B	A	A	H	B	A	A	A	B	B	B	B	B	B	B	B	B	B	B	B	B	A	B	A	B	A	B	B	A	H	A	A	A	A	A	A	A	B	A	B	B	A	B	B	B
RAC875_c12808_182	1A	43.7309		B	B	A	A	H	B	A	A	A	B	B	B	B	B	B	B	B	B	B	B	B	B	A	B	A	B	A	B	B	A	H	A	A	A	A	A	A	A	B	A	B	B	A	B	B	B
RAC875_rep_c104557_1245	1A	43.7309	434425788	B	B	A	A	B	B	A	-	A	B	B	B	B	B	B	B	B	B	B	B	B	B	A	B	A	B	A	B	B	A	B	A	A	A	A	A	A	A	B	A	B	B	A	B	B	B
RFL_Contig530_2305	1A	43.7309	424398679	B	B	A	A	-	B	A	A	A	B	B	B	B	B	B	B	B	B	B	B	B	B	A	B	A	B	A	B	B	A	-	A	A	A	A	A	A	A	B	A	B	B	A	B	B	B
RFL_Contig5450_993	1A	43.7309	246651234	B	B	A	A	H	B	A	A	A	B	B	B	B	B	B	B	B	B	B	B	B	B	A	B	A	B	A	B	B	A	H	A	A	A	A	A	A	A	B	A	B	B	A	B	B	B
TA001772-0625	1A	43.7309	374216815	B	B	A	A	H	B	A	H	A	B	B	B	B	B	B	B	B	B	B	B	B	B	A	B	A	B	A	B	B	A	H	A	A	A	A	A	A	A	B	A	B	B	A	B	B	B
TA002594-0782	1A	43.7309		B	B	A	A	H	B	A	A	A	B	B	B	B	B	B	B	B	B	B	B	B	B	A	B	A	B	A	B	B	A	H	A	A	A	A	A	A	A	B	A	B	B	A	B	B	B
TA003382-0407	1A	43.7309		B	B	A	A	H	B	A	H	A	B	B	B	B	B	B	B	B	B	B	B	B	B	A	B	A	B	A	B	B	A	H	A	A	A	A	A	A	A	B	A	B	B	A	B	B	B
TA004365-0417	1A	43.7309	291255616	B	B	A	A	H	B	A	A	A	B	B	B	B	B	B	B	B	B	B	B	B	B	A	B	A	B	A	B	B	A	H	A	A	A	A	A	A	A	B	A	B	B	A	B	B	B
wsnp_BE403956A_Ta_2_3	1A	43.7309	375468477	B	B	A	A	H	B	A	H	A	B	B	B	B	B	B	B	B	B	B	B	B	B	A	B	A	B	A	B	B	A	H	A	A	A	A	A	A	A	B	A	B	B	A	B	B	B
wsnp_Ex_c10100_16600633	1A	43.7309	302819003	B	B	A	A	H	B	A	A	A	B	B	B	B	B	B	B	B	B	B	B	B	B	A	B	A	B	A	B	B	A	H	A	A	A	A	A	A	A	B	A	B	B	A	B	B	B
wsnp_Ex_c10257_16825240	1A	43.7309	436423039	B	B	A	A	H	B	A	H	A	B	B	B	B	B	B	B	B	B	B	B	B	B	A	B	A	B	A	B	B	A	H	A	A	A	A	A	A	A	B	A	B	B	A	B	B	B
wsnp_Ex_c10595_17291999	1A	43.7309		B	B	A	A	H	B	A	A	A	B	B	B	B	B	B	B	B	B	B	B	B	B	A	B	A	B	A	B	B	A	H	A	A	A	A	A	A	A	-	A	B	B	A	B	B	-
wsnp_Ex_c35563_43690084	1A	43.7309	377427976	B	B	A	A	H	B	A	A	A	B	B	B	B	B	B	B	B	B	B	B	B	B	A	B	A	B	A	B	B	A	H	A	A	A	A	A	A	A	B	A	B	B	A	B	B	B
wsnp_Ex_c6817_11761300	1A	43.7309		B	B	A	A	H	B	A	A	A	B	B	B	B	B	B	B	B	B	B	B	B	B	A	B	A	B	A	B	B	A	H	A	A	A	A	A	A	A	B	A	B	B	A	B	B	B
wsnp_Ex_c6817_11762714	1A	43.7309		B	B	A	A	H	B	A	A	A	B	B	B	B	B	B	B	B	B	B	B	B	B	A	B	A	B	A	B	B	A	H	A	A	A	A	A	A	A	B	A	B	B	A	B	B	B
wsnp_Ex_rep_c66846_65240088	1A	43.7309	441235985	B	B	A	A	H	B	A	A	A	B	B	B	B	B	B	B	B	B	B	B	B	B	A	B	A	B	A	B	B	A	H	A	A	A	A	A	A	A	B	A	B	B	A	B	B	B
wsnp_Ex_rep_c69738_68695568	1A	43.7309	376137575	B	B	A	A	H	B	A	H	A	B	B	B	B	B	B	B	B	B	B	B	B	B	A	B	A	B	A	B	B	A	H	A	A	A	A	A	A	A	B	A	B	B	A	B	B	B
wsnp_Ku_c37925_46679146	1A	43.7309		B	B	A	A	H	B	A	A	A	B	B	B	B	B	B	B	B	B	B	B	B	B	A	B	A	B	A	B	B	A	H	A	A	A	A	A	A	A	B	A	B	B	A	B	B	B
wsnp_Ra_c20126_29372577	1A	43.7309	114062296	B	B	A	A	H	B	A	A	A	B	B	B	B	B	B	B	B	B	B	B	B	B	A	B	A	B	A	B	B	A	H	A	A	A	A	A	A	A	B	A	B	B	A	B	B	B
wsnp_Ra_c24776_34331660	1A	43.7309		B	B	A	A	H	B	A	A	A	B	B	B	B	B	B	B	B	B	B	B	B	B	A	B	A	B	A	B	B	A	H	A	A	A	A	A	A	A	B	A	B	B	A	B	B	B
wsnp_Ra_c41581_48764320	1A	43.7309	240588877	B	B	A	A	H	B	A	A	A	B	B	B	B	B	B	B	B	B	B	B	B	B	A	B	A	B	A	B	B	A	H	A	A	A	A	A	A	A	B	A	B	B	A	B	B	B
BS00016654_51	1A	44.3056	463288438	B	B	A	A	H	B	A	A	A	B	B	B	B	B	B	B	B	B	B	B	B	B	A	B	A	B	A	B	B	A	H	A	A	A	A	A	A	A	B	A	B	B	A	B	B	B
Excalibur_c59894_97	1A	44.3056	463813646	B	B	A	A	H	B	A	A	A	B	B	B	B	B	B	B	B	B	B	B	B	B	A	B	A	B	A	B	B	A	H	A	A	A	A	A	A	A	B	A	B	B	A	B	B	B
IACX18883	1A	44.3056	365536293	B	B	A	A	H	B	A	A	A	B	B	B	B	B	B	B	B	B	B	B	B	B	A	B	A	B	A	B	B	A	H	A	A	A	A	A	A	A	B	A	B	B	A	B	B	B
Kukri_c88698_296	1A	44.3056	464431946	B	B	A	A	H	B	A	A	A	B	B	B	B	B	B	B	B	B	B	B	B	B	A	B	A	B	A	B	B	A	H	A	A	A	A	A	A	A	B	A	B	B	A	B	B	B
Ra_c2895_591	1A	44.3056	462435782	B	B	A	A	H	B	A	A	A	B	B	B	B	B	B	B	B	B	B	B	B	B	A	B	A	B	A	B	B	A	H	A	A	A	A	A	A	A	B	A	B	B	A	B	B	B
RAC875_c86680_391	1A	44.3056	464405239	B	B	A	A	H	B	A	A	A	B	B	B	B	B	B	B	B	B	B	B	B	B	A	B	A	B	A	B	B	A	H	A	A	A	A	A	A	A	B	A	B	B	A	B	B	B
wsnp_Ex_c572_1138339	1A	44.3056		B	B	A	A	H	B	A	A	A	B	B	B	B	B	B	B	B	B	B	B	B	B	A	B	A	B	A	B	B	A	H	A	A	A	A	A	A	A	B	A	B	B	A	B	B	B
wsnp_Ex_c572_1138503	1A	44.3056		B	B	A	A	H	B	A	A	A	B	B	B	B	B	B	B	B	B	B	B	B	B	A	B	A	B	A	B	B	A	H	A	A	A	A	A	A	A	B	A	B	B	A	B	B	B
wsnp_Ex_c572_1138770	1A	44.3056		B	B	A	A	H	B	A	A	A	B	B	B	B	B	B	B	B	B	B	B	B	B	A	B	A	B	A	B	B	A	H	A	A	A	A	A	A	A	B	A	B	B	A	B	B	B
wsnp_Ku_c4018_7333828	1A	44.3056		B	B	A	A	H	B	A	A	A	B	B	B	B	B	B	B	B	B	B	B	B	B	A	B	A	B	A	B	B	A	H	A	A	A	A	A	A	A	B	A	B	B	A	B	B	B
BobWhite_c38865_319	1A	44.8674	465283022	B	B	A	A	H	B	A	B	A	B	B	B	B	B	B	B	B	B	B	B	B	B	A	B	A	B	A	B	B	A	H	A	A	A	A	A	A	A	B	A	B	B	A	B	B	B
BobWhite_rep_c49207_243	1A	44.8674	498632403	B	B	A	A	H	B	H	A	A	B	B	B	B	B	B	B	B	B	B	B	B	B	A	B	A	B	A	B	B	A	H	A	A	A	A	A	A	A	B	A	B	B	A	B	B	B
Ex_c8514_1342	1A	44.8674	471700415	B	B	A	A	H	B	H	A	A	B	B	B	B	B	B	B	B	B	B	B	B	B	A	B	A	B	A	B	B	A	H	A	A	A	A	A	A	A	B	A	B	B	A	B	B	B
GENE-0112_64	1A	44.8674	375955420	H	B	A	A	H	B	H	A	A	B	B	B	B	B	B	B	B	B	B	B	B	B	A	B	A	B	A	B	B	A	H	A	A	A	A	A	A	A	B	A	B	B	A	B	B	B
IAAV7203	1A	44.8674		B	B	A	A	H	B	A	-	A	B	B	B	B	B	B	B	B	B	B	B	B	B	A	B	A	B	A	B	B	A	H	A	A	A	A	A	A	A	B	A	B	B	A	B	B	B
IACX3496	1A	44.8674	471083409	B	B	A	A	H	B	H	-	A	B	B	B	B	B	B	B	B	B	B	B	B	B	A	B	A	B	A	B	B	A	H	A	A	A	A	A	A	A	B	A	B	B	A	B	B	B
Kukri_c3582_87	1A	44.8674	474237083	H	B	A	A	H	B	H	A	A	B	B	B	B	B	B	B	B	B	B	B	B	B	A	B	A	B	A	B	B	A	H	A	A	A	A	A	A	A	B	A	B	B	A	B	B	B
Ra_c58315_265	1A	44.8674	473637156	B	B	A	A	H	B	H	A	A	B	B	B	B	B	B	B	B	B	B	B	B	B	A	B	A	B	A	B	B	A	H	A	A	A	A	A	A	A	B	A	B	B	A	B	B	B
RAC875_c25507_551	1A	44.8674		H	B	A	A	H	B	H	H	A	B	B	B	B	B	B	B	B	B	B	B	B	B	A	B	A	B	A	B	B	A	H	A	A	A	A	A	A	A	B	A	B	B	A	B	B	B
RAC875_c41275_131	1A	44.8674	473787232	B	B	A	A	H	B	H	A	A	B	B	B	B	B	B	B	B	B	B	B	B	B	A	B	A	B	A	B	B	A	H	A	A	A	A	A	A	A	B	A	B	B	A	B	B	B
wsnp_Ex_c25734_34995416	1A	44.8674	472169030	B	B	A	A	H	B	H	A	A	B	B	B	B	B	B	B	B	B	B	B	B	B	A	B	A	B	A	B	B	A	H	A	A	A	A	A	A	A	B	A	B	B	A	B	B	B
wsnp_Ex_c56097_58351893	1A	44.8674	473632631	B	B	A	A	H	B	H	-	A	B	B	B	B	B	B	B	B	B	B	B	B	B	A	B	A	B	A	B	B	A	-	A	A	A	A	A	A	A	B	A	B	B	A	B	B	B
wsnp_Ku_c557_1166684	1A	44.8674	472168091	B	B	A	A	H	B	H	A	A	B	B	B	B	B	B	B	B	B	B	B	B	B	A	B	A	B	A	B	B	A	H	A	A	A	A	A	A	A	B	A	B	B	A	B	B	B
BobWhite_rep_c63278_349	1A	45.4557	485647213	H	B	A	A	H	B	H	A	A	B	B	B	B	B	B	B	B	B	B	B	B	B	A	B	A	B	A	B	B	A	H	B	A	A	A	A	A	A	B	A	B	B	A	B	B	B
BS00002216_51	1A	45.4557	481930807	H	B	A	A	H	B	H	A	A	B	B	B	B	B	B	B	B	B	B	B	B	B	A	B	A	B	A	B	B	A	H	B	A	A	A	A	A	A	B	A	B	B	A	B	B	B
BS00021714_51	1A	45.4557		-	B	A	A	-	B	-	-	A	B	B	B	B	B	B	B	B	B	B	B	B	B	A	B	A	B	A	B	B	A	H	B	A	A	A	A	A	A	B	A	B	B	A	B	B	B
BS00032112_51	1A	45.4557	494446921	A	B	A	A	A	B	-	-	A	B	B	B	B	B	B	B	B	B	B	B	B	B	A	B	A	B	A	B	B	A	A	B	A	A	A	A	A	A	B	A	B	B	A	B	B	B
Excalibur_c10167_1028	1A	45.4557	376782672	H	B	A	A	H	B	H	A	A	B	B	B	B	B	B	B	B	B	B	B	B	B	A	B	A	B	A	B	B	A	H	B	A	A	A	A	A	A	B	A	B	B	A	B	B	B
Excalibur_c49421_443	1A	45.4557	487012029	H	B	A	A	H	B	H	A	A	B	B	B	B	B	B	B	B	B	B	B	B	B	A	B	A	B	A	B	B	A	H	B	A	A	A	A	A	A	B	A	B	B	A	B	B	B
GENE-0410_71	1A	45.4557	530472849	-	B	A	A	-	B	-	A	A	B	B	B	B	B	B	B	B	B	B	B	B	B	A	B	A	B	A	B	B	A	-	B	A	A	A	A	A	A	B	A	B	B	A	B	B	B
IAAV2072	1A	45.4557		H	B	A	A	H	B	H	A	A	B	B	B	B	B	B	B	B	B	B	B	B	B	A	B	A	B	A	B	B	A	H	B	A	A	A	A	A	A	B	A	B	B	A	B	B	B
IAAV5406	1A	45.4557	487311547	H	B	A	A	H	B	H	A	A	B	B	B	B	B	B	B	B	B	B	B	B	B	A	B	A	B	A	B	B	A	H	B	A	A	A	A	A	A	B	A	B	B	A	B	B	B
IACX11338	1A	45.4557		H	B	A	A	H	B	H	A	A	B	B	B	B	B	B	B	B	B	B	B	B	B	A	B	A	B	A	B	B	A	H	B	A	A	A	A	A	A	B	A	B	B	A	B	B	B
IACX4378	1A	45.4557	482335926	H	B	A	A	-	B	H	A	A	B	B	B	B	B	B	B	B	B	B	B	B	B	A	B	A	B	A	B	B	A	-	B	A	A	A	A	A	A	B	A	B	B	A	B	B	B
IACX742	1A	45.4557	483033755	H	B	A	A	H	B	H	A	A	B	B	B	B	B	B	B	B	B	B	B	B	B	A	B	A	B	A	B	B	A	H	B	A	A	A	A	A	A	B	A	B	B	A	B	B	B
Kukri_c10239_2186	1A	45.4557	477249562	H	B	A	A	H	B	H	-	A	B	B	B	B	B	B	B	B	B	B	B	B	B	A	B	A	B	A	B	B	A	H	B	A	A	A	A	A	A	B	A	B	B	A	B	B	B
Kukri_c25215_124	1A	45.4557	491721379	H	B	A	A	H	B	H	A	A	B	B	B	B	B	B	B	B	B	B	B	B	B	A	B	A	B	A	B	B	A	H	B	A	A	A	A	A	A	B	A	B	B	A	B	B	B
Kukri_c52952_315	1A	45.4557	520528306	H	B	A	A	H	B	H	A	A	B	B	B	B	B	B	B	B	B	B	B	B	B	A	B	A	B	A	B	B	A	H	B	A	A	A	A	A	A	B	A	B	B	A	B	B	B
Kukri_c60564_136	1A	45.4557	482245872	H	B	A	A	H	B	H	A	A	B	B	B	B	B	B	B	B	B	B	B	B	B	A	B	A	B	A	B	B	A	H	B	A	A	A	A	A	A	B	A	B	B	A	B	B	B
RAC875_c23081_141	1A	45.4557	491130184	H	B	A	A	H	B	H	A	A	B	B	B	B	B	B	B	B	B	B	B	B	B	A	B	A	B	A	B	B	A	H	B	A	A	A	A	A	A	B	A	B	B	A	B	B	B
RAC875_c31276_1128	1A	45.4557	483930125	H	B	A	A	H	B	H	A	A	B	B	B	B	B	B	B	B	B	B	B	B	B	A	B	A	B	A	B	B	A	H	B	A	A	A	A	A	A	B	A	B	B	A	B	B	B
RAC875_c54380_249	1A	45.4557		A	B	A	A	-	B	A	-	A	B	B	B	B	B	B	B	B	B	B	B	B	B	A	B	A	B	A	B	B	A	A	B	A	A	A	A	A	A	B	A	B	B	A	B	B	B
RFL_Contig3203_1971	1A	45.4557	482966563	H	B	A	A	H	B	H	A	A	B	B	B	B	B	B	B	B	B	B	B	B	B	A	B	A	B	A	B	B	A	H	B	A	A	A	A	A	A	B	A	B	B	A	B	B	B
wsnp_Ex_c21193_30320134	1A	45.4557	491149118	H	B	A	A	H	B	H	A	A	B	B	B	B	B	B	B	B	B	B	B	B	B	A	B	A	B	A	B	B	A	H	B	A	A	A	A	A	A	B	A	B	B	A	B	B	B
wsnp_Ex_c21336_30465618	1A	45.4557	492123959	H	B	A	A	H	B	H	H	A	B	B	B	B	B	B	B	B	B	B	B	B	B	A	B	A	B	A	B	B	A	H	B	A	A	A	A	A	A	B	A	B	B	A	B	B	B
wsnp_Ex_c5192_9203682	1A	45.4557	485002382	H	B	A	A	H	B	H	A	A	B	B	B	B	B	B	B	B	B	B	B	B	B	A	B	A	B	A	B	B	A	H	B	A	A	A	A	A	A	B	A	B	B	A	B	B	B
wsnp_Ex_c5216_9235964	1A	45.4557	381031651	H	B	A	A	H	B	H	A	A	B	B	B	B	B	B	B	B	B	B	B	B	B	A	B	A	B	A	B	B	A	H	B	A	A	A	A	A	A	B	A	B	B	A	B	B	B
wsnp_Ex_rep_c66628_64934660	1A	45.4557	485357401	H	B	A	A	H	B	H	A	A	B	B	B	B	B	B	B	B	B	B	B	B	B	A	B	A	B	A	B	B	A	H	B	A	A	A	A	A	A	B	A	B	B	A	B	B	B
wsnp_Ra_c12148_19539667	1A	45.4557	484335968	H	B	A	A	H	B	H	A	A	B	B	B	B	B	B	B	B	B	B	B	B	B	A	B	A	B	A	B	B	A	H	B	A	A	A	A	A	A	B	A	B	B	A	B	B	B
wsnp_Ra_c37745_45806931	1A	45.4557	485343139	H	B	A	A	H	B	H	A	A	B	B	B	B	B	B	B	B	B	B	B	B	B	A	B	A	B	A	B	B	A	H	B	A	A	A	A	A	A	B	A	B	B	A	B	B	B
wsnp_Ra_c7818_13376644	1A	45.4557		H	B	A	A	H	B	H	A	A	B	B	B	B	B	B	B	B	B	B	B	B	B	A	B	A	B	A	B	B	A	H	B	A	A	A	A	A	A	B	A	B	B	A	B	B	B
BS00021728_51	1A	49.2605	503841754	H	B	A	A	H	B	H	A	A	B	B	B	B	B	B	B	B	B	B	B	B	B	A	B	A	B	A	B	B	A	H	B	A	A	A	H	A	A	B	A	B	B	A	A	A	B
IACX5960	1A	49.2605	500158430	H	B	A	A	H	B	H	A	A	B	B	B	B	B	B	B	B	B	B	B	B	B	A	B	A	B	A	B	B	A	H	B	A	A	A	A	A	A	B	A	B	B	A	A	A	B
Kukri_rep_c117029_125	1A	49.2605	500988741	H	B	A	A	H	B	H	A	A	B	B	B	B	B	B	B	B	B	B	B	B	B	A	B	A	B	A	B	B	A	H	B	A	A	A	H	A	A	B	A	B	B	A	A	A	B
RAC875_c29540_1109	1A	49.2605		-	B	A	A	-	B	-	A	A	B	B	B	B	B	B	B	B	B	B	B	B	B	A	B	A	B	A	B	B	A	H	B	A	A	A	H	A	A	B	A	B	B	A	A	A	B
RAC875_c29540_413	1A	49.2605		H	B	A	A	H	B	H	A	A	B	B	B	B	B	B	B	B	B	B	B	B	B	A	B	A	B	A	B	B	A	H	B	A	A	A	H	A	A	B	A	B	B	A	A	A	B
wsnp_Ex_rep_c108951_91954190	1A	49.2605		H	B	A	A	H	B	H	A	A	B	B	B	B	B	B	B	B	B	B	B	B	B	A	B	A	B	A	B	B	A	H	B	A	A	A	H	A	A	B	A	B	B	A	A	A	B
wsnp_Ra_c3270_6136601	1A	49.2605		H	B	A	A	H	B	H	A	A	B	B	B	B	B	B	B	B	B	B	B	B	B	A	B	A	B	A	B	B	A	H	B	A	A	A	H	A	A	B	A	B	B	A	A	A	B
RAC875_c37545_289	1A	49.8703	505282998	B	B	A	A	H	B	H	A	A	B	B	B	B	B	B	B	B	B	B	B	B	B	A	B	A	B	A	B	B	A	H	B	A	A	A	-	A	A	B	A	B	B	A	A	A	B
BS00064638_51	1A	50.4876	20329256	H	B	A	A	-	B	-	-	A	B	B	B	B	B	B	B	B	B	B	B	B	B	A	B	A	B	A	B	B	A	-	B	A	A	A	H	A	A	B	A	B	B	A	A	A	B
Kukri_c29039_315	1A	50.4876	505672046	-	B	A	A	-	B	-	H	A	B	B	B	B	B	B	B	B	B	B	B	B	B	A	B	A	B	A	B	B	A	-	B	A	A	A	-	A	A	B	A	B	B	A	A	A	B
Kukri_c39377_286	1A	50.4876		H	B	A	A	H	B	H	A	A	B	B	B	B	B	B	B	B	B	B	B	B	B	A	B	A	B	A	B	B	A	H	B	A	A	A	H	A	A	B	A	B	B	A	A	A	B
TA003063-0097	1A	50.4876		H	B	A	A	H	B	H	H	A	B	B	B	B	B	B	B	B	B	B	B	B	B	A	B	A	B	A	B	B	A	H	B	A	A	A	H	A	A	B	A	B	B	A	A	A	B
wsnp_CAP12_c1960_972031	1A	50.4876	508527866	H	B	A	A	H	B	H	H	A	B	B	B	B	B	B	B	B	B	B	B	B	B	A	B	A	B	A	B	B	A	H	B	A	A	A	H	A	A	B	A	B	B	A	A	A	B
wsnp_Ku_c1642_3232242	1A	50.4876	507079282	H	B	A	A	B	B	H	-	A	B	B	B	B	B	B	B	B	B	B	B	B	B	A	B	A	B	A	B	B	A	H	B	A	A	A	H	A	A	B	A	B	B	A	A	A	B
wsnp_Ku_c10292_17066821	1A	51.09	506854690	A	B	A	A	-	B	H	A	A	B	B	B	B	B	B	B	B	B	B	B	B	B	A	B	A	B	A	B	B	A	H	B	A	A	A	H	A	A	B	A	B	B	A	A	A	B
Ku_c10813_1122	1A	53.5921	513891718	A	B	A	A	H	B	A	A	A	B	B	B	B	A	B	B	B	B	B	B	B	B	A	A	B	B	A	B	B	A	A	B	A	A	A	H	A	A	B	A	B	B	A	A	A	B
Ku_c1313_1673	1A	53.5921	513662375	A	B	A	A	H	B	A	A	A	B	B	B	B	A	B	B	B	B	B	B	B	B	A	A	B	B	A	B	B	A	A	B	A	A	A	H	A	A	B	A	B	B	A	A	A	B
Ra_c64515_242	1A	53.5921	513894012	A	B	A	A	H	B	A	A	A	B	B	B	B	A	B	B	B	B	B	B	B	B	A	A	B	B	A	B	B	A	A	B	A	A	A	H	A	A	B	A	B	B	A	A	A	B
Jagger_c5280_407	1A	54.1804	514138226	A	B	A	A	H	B	A	A	A	B	B	B	B	A	B	B	B	B	B	B	B	B	A	A	B	B	A	B	B	A	A	B	A	A	A	H	A	A	B	A	B	A	A	A	A	B
wsnp_Ex_c1997_3755945	1A	54.1804	514137720	A	B	A	A	H	B	A	A	A	B	B	B	B	A	B	B	B	B	B	B	B	B	A	A	B	B	A	B	B	A	A	B	A	A	A	H	A	A	B	A	B	A	A	A	A	B
wsnp_JD_c6544_7697578	1A	54.1804	514138060	A	B	A	A	H	B	A	A	A	B	B	B	B	A	B	B	B	B	B	B	B	B	A	A	B	B	A	B	B	A	A	B	A	A	A	-	A	A	B	A	B	A	A	A	A	B
Excalibur_c44668_382	1A	56.0104	516454526	A	B	A	A	H	B	A	H	A	B	B	B	B	A	B	B	B	B	B	B	A	B	A	A	B	B	A	B	B	A	A	B	A	A	A	H	A	A	B	A	B	A	A	A	A	B
TA002402-1350	1A	56.0104		A	B	A	A	H	B	A	A	A	B	B	B	B	A	B	B	B	B	B	B	A	B	A	A	B	B	A	B	B	A	A	B	A	A	A	H	A	A	B	A	B	A	A	A	A	B
BobWhite_c11946_277	1A	56.5919	516786329	A	B	A	A	H	A	A	A	A	B	B	B	B	A	B	B	B	B	B	B	A	B	A	A	B	B	A	B	B	A	A	B	A	A	A	H	A	A	B	A	B	A	A	A	A	B
BS00022788_51	1A	56.5919	516786308	A	B	A	A	H	A	A	A	A	B	B	B	B	A	B	B	B	B	B	B	A	B	A	A	B	B	A	B	B	A	A	B	A	A	A	H	A	A	B	A	B	A	A	A	A	B
BS00009808_51	1A	61.1499	530232680	A	B	A	A	A	A	A	H	A	B	B	B	B	A	A	B	B	B	B	B	A	B	A	A	H	B	A	A	B	A	A	B	A	A	A	B	A	A	B	A	B	A	A	A	A	B
BS00034278_51	1A	61.1499	530173432	A	B	A	A	A	A	A	H	A	B	B	B	B	A	A	B	B	B	B	B	A	B	A	A	H	B	A	A	B	A	A	B	A	A	A	B	A	A	B	A	B	A	A	A	A	B
BS00039378_51	1A	61.1499	522500993	A	B	A	A	A	A	A	A	A	B	B	B	B	A	A	B	B	B	B	B	A	B	A	A	H	B	A	A	B	A	A	B	A	A	A	B	A	A	B	A	B	A	A	A	A	B
BS00062876_51	1A	61.1499		A	B	A	A	A	A	A	A	A	B	B	B	B	A	A	B	B	B	B	B	A	B	A	A	H	B	A	A	B	A	A	B	A	A	A	B	A	A	B	A	B	A	A	A	A	B
CAP7_c1891_230	1A	61.1499	530177169	A	B	A	A	A	A	A	A	A	B	B	B	B	A	A	B	B	B	B	B	A	B	A	A	H	B	A	A	B	A	A	B	A	A	A	B	A	A	B	A	B	A	A	A	A	B
GENE-0392_97	1A	61.1499	529247883	A	B	A	A	A	A	A	A	A	B	B	B	B	A	A	B	B	B	B	B	A	B	A	A	-	B	A	A	B	A	A	B	A	A	A	B	A	A	B	A	B	A	A	A	A	B
Kukri_c67383_102	1A	61.1499	431799423	A	B	A	A	A	A	A	A	A	B	B	B	B	A	A	B	B	B	B	B	A	B	A	A	-	B	A	A	B	A	A	B	A	A	A	B	A	A	B	A	B	A	A	A	A	B
RAC875_c8482_160	1A	61.1499	431810514	A	B	A	A	-	A	A	A	A	B	B	B	B	A	A	B	B	B	B	B	A	B	A	A	H	B	A	A	B	A	A	B	A	A	A	B	A	A	B	A	B	A	A	A	A	B
wsnp_Ex_c43228_49605281	1A	61.1499		A	B	A	A	A	A	A	A	A	B	B	B	B	A	A	B	B	B	B	B	A	B	A	A	H	B	A	A	B	A	A	B	A	A	A	B	A	A	B	A	B	A	A	A	A	B
wsnp_Ex_rep_c68085_66839109	1A	61.1499	530214995	A	B	A	A	A	A	A	A	A	B	B	B	B	A	A	B	B	B	B	B	A	B	A	A	H	B	A	A	B	A	A	B	A	A	A	B	A	A	B	A	B	A	A	A	A	B
wsnp_Ku_c17322_26392311	1A	61.1499	528668864	A	B	A	A	A	A	A	A	A	B	B	B	B	A	A	B	B	B	B	B	A	B	A	A	H	B	A	A	B	A	A	B	A	A	A	B	A	A	B	A	B	A	A	A	A	B
wsnp_Ku_c5210_9289260	1A	61.1499	527952067	A	B	A	A	A	A	A	A	A	B	B	B	B	A	A	B	B	B	B	B	A	B	A	A	H	B	A	A	B	A	A	B	A	A	A	B	A	A	B	A	B	A	A	A	A	B
wsnp_Ra_c11594_18777085	1A	61.1499	530236430	A	B	A	A	A	A	A	A	A	B	B	B	B	A	A	B	B	B	B	B	A	B	A	A	H	B	A	A	B	A	A	B	A	A	A	B	A	A	B	A	B	A	A	A	A	B
BobWhite_c96_170	1A	62.98	531682521	A	B	A	A	A	A	A	A	A	B	B	B	B	A	A	B	B	B	B	B	A	B	A	A	H	B	A	A	B	A	A	B	A	A	A	B	A	A	B	A	B	B	A	A	A	B
wsnp_Ex_c5060_8985678	1A	62.98	531682521	A	B	A	A	A	A	A	A	A	B	B	B	B	A	A	B	B	B	B	B	A	B	A	A	H	B	A	A	B	A	A	B	A	A	A	B	A	A	B	A	B	B	A	A	A	B
Kukri_c45512_193	1A	71.1603		A	B	A	A	A	A	B	A	A	H	B	B	A	A	A	B	B	B	A	B	A	B	A	A	H	B	A	A	B	A	A	B	A	A	B	B	H	B	B	A	B	B	H	A	A	B
RAC875_c15975_1208	1A	71.1603		A	B	A	A	A	A	B	A	A	H	B	B	A	A	A	B	B	B	A	B	A	B	A	A	H	B	A	A	B	A	A	B	A	A	B	B	H	B	B	A	B	B	H	A	A	B
wsnp_CAP7_c3472_1623955	1A	71.7486	534265561	A	B	A	A	A	A	B	A	A	H	B	B	A	A	A	B	B	B	A	B	A	B	A	A	H	B	A	A	B	A	A	B	A	A	B	B	H	B	B	A	B	B	H	A	A	B
BS00012042_51	1A	72.3438	534242444	B	B	A	A	A	A	B	-	A	H	B	B	A	A	A	B	B	B	A	B	A	B	A	A	H	B	A	A	B	A	A	B	A	A	B	B	H	B	B	A	B	B	H	A	A	B
Kukri_c49463_154	1A	72.9391	438226915	B	B	A	A	A	A	A	A	A	B	B	B	A	A	A	B	B	B	A	B	A	B	A	A	A	B	A	A	B	A	A	B	A	A	B	B	B	B	B	A	B	B	-	A	A	B
BobWhite_c13761_242	1A	74.1298		B	B	A	A	A	A	A	A	A	H	B	B	A	A	A	B	B	B	A	B	A	B	A	A	H	B	A	A	A	A	A	B	A	A	B	B	H	B	B	A	B	B	H	A	A	B
BS00022396_51	1A	74.1298		B	B	A	A	A	A	A	A	A	H	B	B	A	A	A	B	B	B	A	B	A	B	A	A	H	B	A	A	A	A	A	B	A	A	B	B	H	B	B	A	B	B	H	A	A	B
Excalibur_c45861_189	1A	74.1298	438581726	B	B	A	A	A	A	A	A	A	H	B	B	A	A	A	B	B	B	A	B	A	B	A	A	H	B	A	A	A	A	A	B	A	A	B	B	H	B	B	A	B	B	H	A	A	B
wsnp_BG606986A_Ta_2_1	1A	74.1298	535315011	B	B	A	A	A	A	A	A	A	H	B	B	A	A	A	B	B	B	A	B	A	B	A	A	H	B	A	A	A	A	A	B	A	A	B	B	H	B	B	A	B	B	H	A	A	B
GENE-0069_468	1A	74.7251	537569153	B	B	A	A	A	A	A	A	A	H	B	B	A	A	A	B	B	B	A	B	A	B	A	A	H	B	A	A	A	A	A	B	A	A	B	B	H	B	B	A	B	B	H	B	A	B
RAC875_c120509_133	1A	74.7251	537355984	B	B	A	A	A	A	A	A	A	-	B	B	A	A	A	B	B	B	A	B	A	B	A	A	-	B	A	A	A	A	A	B	A	A	B	B	A	B	B	A	B	B	-	B	A	B
RAC875_c23168_480	1A	74.7251	537965047	B	B	A	A	A	A	A	A	A	H	B	B	A	A	A	B	B	B	A	B	A	B	A	A	H	B	A	A	A	A	A	B	A	A	B	B	H	B	B	A	B	B	H	B	A	B
Excalibur_c97157_65	1A	75.3275	539702744	B	B	A	A	A	A	A	A	A	H	B	B	A	A	A	B	B	B	A	B	A	B	A	A	H	B	A	A	A	A	A	B	A	A	B	B	H	B	B	A	B	B	H	B	A	B
IACX5994	1A	75.3275	540051810	B	B	A	A	A	A	A	A	A	H	B	B	A	A	A	B	B	B	A	B	A	B	A	A	H	B	A	A	A	A	A	B	A	A	B	B	H	B	B	A	B	B	H	B	A	B
Kukri_c24570_282	1A	75.3275	539559419	B	B	A	A	A	A	A	A	A	H	B	B	A	A	A	B	B	B	A	B	A	B	A	A	H	B	A	A	A	A	A	B	A	A	B	B	H	B	B	A	B	B	H	B	A	B
Kukri_c7119_392	1A	75.3275	540051171	B	B	A	A	A	A	A	A	A	H	B	B	A	A	A	B	B	B	A	B	A	B	A	A	H	B	A	A	A	A	A	B	A	A	B	B	H	B	B	A	B	B	H	B	A	B
RAC875_c21411_162	1A	75.3275	444335737	B	B	A	A	A	A	A	A	A	H	B	B	A	A	A	B	B	B	A	B	A	B	A	A	H	B	A	A	A	A	A	B	A	A	B	B	H	B	B	A	B	B	H	B	A	B
RAC875_rep_c72890_63	1A	75.3275	540145112	B	B	A	A	A	A	A	A	A	H	B	B	A	A	A	B	B	B	A	B	A	B	A	A	H	B	A	A	A	A	A	B	A	A	B	B	H	B	B	A	B	B	H	B	A	B
TA001600-1603	1A	75.3275		B	B	A	A	A	A	A	A	A	H	B	B	A	A	A	B	B	B	A	B	A	B	A	A	H	B	A	A	A	A	A	B	A	A	B	B	H	B	B	A	B	B	H	B	A	B
wsnp_Ex_c33452_41938013	1A	75.3275	540051810	B	B	A	A	A	A	A	A	A	H	B	B	A	A	A	B	B	B	A	B	A	B	A	A	H	B	A	A	A	A	A	B	A	A	B	B	H	B	B	A	B	B	H	B	A	B
wsnp_Ex_c33452_41938159	1A	75.3275	540051956	B	B	A	A	A	A	A	A	A	H	B	B	A	A	A	B	B	B	A	B	A	B	A	A	H	B	A	A	A	A	A	B	A	A	B	B	H	B	B	A	B	B	H	B	A	B
wsnp_Ex_c41953_48657850	1A	75.3275	540145112	B	B	A	A	A	A	A	A	A	H	B	B	A	A	A	B	B	B	A	B	A	B	A	A	H	B	A	A	A	A	A	B	A	A	B	B	H	B	B	A	B	B	H	B	A	B
wsnp_Ex_c41953_48658353	1A	75.3275	540146970	B	B	A	A	A	A	A	A	A	H	B	B	A	A	A	B	B	B	A	B	A	B	A	A	H	B	A	A	A	A	A	B	A	A	B	B	H	B	B	A	B	B	H	B	A	B
wsnp_JD_c3973_5044238	1A	75.3275	540143911	B	B	A	A	A	A	A	H	A	H	B	B	A	A	A	B	B	B	A	B	A	B	A	A	H	B	A	A	A	A	A	B	A	A	B	B	H	B	B	A	B	B	H	B	A	B
Ku_c8992_405	1A	75.9299	539998723	B	B	A	A	A	A	A	-	A	B	B	B	A	A	A	B	B	B	A	B	A	B	A	A	-	B	A	A	A	A	A	B	A	A	B	B	B	B	B	A	B	B	-	B	A	B
RAC875_c12348_720	1A	75.9299	541227617	B	H	A	A	A	A	A	A	A	H	B	B	A	A	A	B	B	B	A	B	A	B	A	A	H	B	A	A	A	A	A	B	A	A	B	B	H	B	B	A	B	B	H	B	A	B
RAC875_rep_c105766_652	1A	75.9299	541469213	B	H	A	A	A	A	A	A	A	H	B	B	A	A	A	B	B	B	A	B	A	B	A	A	H	B	A	A	A	A	A	B	A	A	B	B	H	B	B	A	B	B	H	B	A	B
wsnp_Ex_rep_c102067_87314043	1A	75.9299	541468767	B	H	A	A	A	A	A	A	A	H	B	B	A	A	A	B	B	B	A	B	A	B	A	A	H	B	A	A	A	A	A	B	A	A	B	B	H	B	B	A	B	B	H	B	A	B
BobWhite_c22134_398	1A	76.5324		B	H	A	A	A	A	A	A	A	B	B	B	A	A	A	B	B	B	A	B	A	B	B	A	H	B	A	A	A	A	A	B	A	A	B	B	H	B	B	A	B	B	H	B	A	B
BobWhite_c41272_159	1A	76.5324		B	H	A	A	A	A	A	A	A	H	B	B	A	A	A	B	B	B	A	B	A	B	B	A	H	B	A	A	A	A	A	B	A	A	B	B	H	B	B	A	B	B	H	B	A	B
BS00070580_51	1A	76.5324		B	H	A	A	A	A	A	A	A	B	B	B	A	A	A	B	B	B	A	B	A	B	B	A	H	B	A	A	A	A	A	B	A	A	B	B	H	B	B	A	B	B	H	B	A	B
Excalibur_c26688_138	1A	76.5324		B	H	A	A	A	A	A	A	A	H	B	B	A	A	A	B	B	B	A	B	A	B	B	A	H	B	A	A	A	A	A	B	A	A	B	B	H	B	B	A	B	B	H	B	A	B
GENE-0033_233	1A	76.5324	542003136	B	H	A	A	A	A	A	A	A	H	B	B	A	A	A	B	B	B	A	B	A	B	B	A	H	B	A	A	A	A	A	B	A	A	B	B	H	B	B	A	B	B	H	B	A	B
IAAV7172	1A	76.5324		B	-	A	A	A	A	A	A	A	-	B	B	A	A	A	B	B	B	A	B	A	B	B	A	-	B	A	A	A	A	A	B	A	A	B	B	-	B	B	A	B	B	-	B	A	B
RAC875_c32379_216	1A	76.5324		B	H	A	A	A	A	A	A	A	B	B	B	A	A	A	B	B	B	A	B	A	B	B	A	H	B	A	A	A	A	A	B	A	A	B	B	H	B	B	A	B	B	H	B	A	B
RFL_Contig5334_831	1A	76.5324	446265398	B	H	A	A	A	A	A	A	A	H	B	B	A	A	A	B	B	B	A	B	A	B	B	A	H	B	A	A	A	A	A	B	A	A	B	B	H	B	B	A	B	B	H	B	A	B
Tdurum_contig96086_74	1A	76.5324		B	H	A	A	A	A	A	A	A	H	B	B	A	A	A	B	B	B	A	B	A	B	B	A	H	B	A	A	A	A	A	B	A	A	B	B	H	B	B	A	B	B	H	B	A	B
wsnp_BE443588A_Ta_2_2	1A	76.5324	542136735	B	H	A	A	A	A	A	A	A	H	B	B	A	A	A	B	B	B	A	B	A	B	B	A	H	B	A	A	A	A	A	B	A	A	B	B	H	B	B	A	B	B	H	B	A	B
wsnp_CAP8_c4785_2322876	1A	76.5324	544054745	B	H	A	A	A	A	A	H	A	B	B	B	A	A	A	B	B	B	A	B	A	B	B	A	H	B	A	A	A	A	A	B	A	A	B	B	H	B	B	A	B	B	H	B	A	B
wsnp_Ex_c28900_37982485	1A	76.5324	542000033	B	H	A	A	A	A	A	A	A	H	B	B	A	A	A	B	B	B	A	B	A	B	B	A	H	B	A	A	A	A	A	B	A	A	B	B	H	B	B	A	B	B	H	B	A	B
wsnp_Ex_c4612_8254533	1A	76.5324	542438010	B	H	A	A	A	A	A	H	A	H	B	B	A	A	A	B	B	B	A	B	A	B	B	A	H	B	A	A	A	A	A	B	A	A	B	B	H	B	B	A	B	B	H	B	A	B
Ra_c29200_300	1A	80.9744		B	H	A	A	A	A	A	A	A	B	B	B	A	A	A	B	B	B	A	B	A	B	B	A	A	B	A	A	A	A	A	B	B	A	B	B	H	B	B	A	B	B	H	B	A	B
wsnp_CAP8_rep_c3938_1936666	1A	80.9744		B	H	A	A	A	A	A	A	A	B	B	B	A	A	A	B	B	B	A	B	A	B	B	A	A	B	A	A	A	A	A	B	B	A	B	B	H	B	B	A	B	B	H	B	A	B
Excalibur_c1936_1072	1A	82.111	564749321	B	H	A	A	A	A	A	A	A	B	B	B	A	A	A	B	B	B	A	B	A	B	A	A	A	B	A	A	A	A	A	B	B	A	B	B	H	B	B	A	B	B	H	B	A	B
Excalibur_c66_147	1A	82.111	572350838	B	H	A	A	A	A	A	A	A	B	B	B	A	A	A	B	B	B	A	B	A	B	A	A	A	B	A	A	A	A	A	B	B	A	B	B	H	B	B	A	B	B	H	B	A	B
Kukri_c51781_199	1A	82.111	568547561	B	H	A	A	A	A	A	A	A	B	B	B	A	A	A	B	B	B	A	B	A	B	A	A	A	B	A	A	A	A	A	B	B	A	B	B	H	B	B	A	B	B	H	B	A	B
Ra_c5683_1762	1A	82.111	551461696	B	H	A	A	A	A	A	A	A	B	B	B	A	A	A	B	B	B	A	B	A	B	A	A	A	B	A	A	A	A	A	B	B	A	B	B	H	B	B	A	B	B	H	B	A	B
Tdurum_contig18174_283	1A	82.111	566484733	B	H	A	A	A	A	A	A	A	B	B	B	A	A	A	B	B	B	A	B	A	B	A	A	A	B	A	A	A	A	A	B	B	A	B	B	-	B	B	A	B	B	-	B	A	B
Tdurum_contig81011_244	1A	82.111	572350933	B	H	A	A	A	A	A	A	A	B	B	B	A	A	A	B	B	B	A	B	A	B	A	A	A	B	A	A	A	A	A	B	B	A	B	B	H	B	B	A	B	B	H	B	A	B
wsnp_BF474340A_Ta_2_1	1A	82.111	556942126	B	H	A	A	A	A	A	A	A	B	B	B	A	A	A	B	B	B	A	B	A	B	A	A	A	B	A	A	A	A	A	B	B	A	B	B	H	B	B	A	B	B	H	B	A	B
wsnp_CAP11_c146_160903	1A	82.111	572350933	B	H	A	A	A	A	A	A	A	B	B	B	A	A	A	B	B	B	A	B	A	B	A	A	A	B	A	A	A	A	A	B	B	A	B	B	H	B	B	A	B	B	H	B	A	B
wsnp_Ex_c23598_32826926	1A	82.111		B	-	A	A	A	A	A	A	A	B	B	B	A	A	A	B	B	B	A	B	A	B	A	A	A	B	A	A	A	A	A	B	B	A	B	B	-	B	B	A	B	B	-	B	A	B
wsnp_Ex_c6488_11266589	1A	82.111	550613149	B	H	A	A	A	A	A	A	A	B	B	B	A	A	A	B	B	B	A	B	A	B	A	A	A	B	A	A	A	A	A	B	B	A	B	B	H	B	B	A	B	B	H	B	A	B
wsnp_Ku_rep_c109724_94227136	1A	82.111	564302528	B	H	A	A	A	A	A	A	A	B	B	B	A	A	A	B	B	B	A	B	A	B	A	A	A	B	A	A	A	A	A	B	B	A	B	B	H	B	B	A	B	B	H	B	A	B
BS00022824_51	1A	87.832	577474214	B	H	A	B	A	A	A	A	A	A	A	A	A	A	A	A	B	B	H	A	A	B	A	A	A	B	A	A	B	A	A	A	B	A	B	B	A	B	B	A	B	B	B	B	A	B
BS00023114_51	1A	87.832	576673913	B	H	A	B	A	A	A	A	A	A	A	A	A	A	A	A	B	B	H	A	A	B	A	A	A	B	A	A	B	A	A	A	B	A	B	B	A	B	B	A	B	B	H	B	A	B
BS00106641_51	1A	87.832	577079132	B	H	A	B	A	A	A	A	A	A	A	A	A	A	A	A	B	B	H	A	A	B	A	A	A	B	A	A	B	A	A	A	B	A	B	B	A	B	B	A	B	B	H	B	A	B
wsnp_Ex_c18499_27344859	1A	87.832	576896852	B	H	A	B	A	A	A	A	A	A	A	A	A	A	A	A	B	B	H	A	A	B	A	A	A	B	A	A	B	A	A	A	B	A	B	B	A	B	B	A	B	B	H	B	A	B
RAC875_c53725_217	1A	89.5974	577841655	B	H	A	B	A	A	A	H	A	A	A	A	A	A	A	A	B	B	H	A	A	B	A	A	A	B	A	A	B	A	A	A	B	A	B	B	A	B	B	A	H	B	B	B	A	A
wsnp_Ex_c9343_15514531	1A	89.5974	577841123	B	H	A	B	A	A	A	A	A	A	A	A	A	A	A	A	B	B	H	A	A	B	A	A	A	B	A	A	B	A	A	A	B	A	B	B	A	B	B	A	H	B	B	B	A	A
wsnp_Ex_c9343_15514687	1A	89.5974	577840967	B	H	A	B	A	A	A	A	A	A	A	A	A	A	A	A	B	B	H	A	A	B	A	A	A	B	A	A	B	A	A	A	B	A	B	B	A	B	B	A	H	B	B	B	A	A
wsnp_Ex_c3201_5910642	1A	90.1722	579299322	B	H	A	B	A	A	A	A	A	A	A	A	A	A	A	A	B	B	H	A	A	B	A	A	A	B	A	A	B	A	A	A	B	A	B	B	A	B	B	A	H	B	B	B	A	A
BS00065170_51	1A	91.9376	582749075	B	H	A	B	A	A	A	A	A	A	A	A	A	A	A	A	B	B	H	A	A	B	A	A	B	B	A	A	B	A	A	A	B	A	B	B	A	B	B	A	H	B	B	B	A	A
IAAV6100	1A	92.5124	582460183	B	H	A	B	A	A	A	-	A	A	A	A	A	A	A	A	B	B	H	A	A	B	A	A	B	B	A	A	B	A	A	A	B	A	B	B	A	B	B	A	H	B	B	B	A	A
wsnp_Ex_c15377_23637176	1A	92.5124	583291126	B	H	A	B	A	A	A	A	A	A	A	A	A	A	A	A	B	B	H	A	A	B	A	A	B	B	A	A	B	A	A	A	B	A	B	B	A	B	B	A	H	B	B	B	A	A
IAAV1930	1A	93.0806	486067813	B	H	A	B	A	A	A	A	A	A	A	A	A	A	A	A	B	B	H	A	A	B	A	A	B	B	A	A	B	A	A	A	B	A	B	B	A	B	B	A	H	B	B	B	A	A
RAC875_c62550_470	1A	93.0806	583489777	B	H	A	B	A	A	A	A	A	A	A	A	A	A	A	A	B	B	H	A	A	B	A	A	B	B	A	A	B	A	A	A	B	A	B	B	A	B	B	A	-	B	B	B	A	A
BS00056823_51	1A	93.6553	584478751	B	H	A	B	A	A	A	A	A	A	A	A	A	A	A	A	B	B	H	A	B	B	A	A	B	B	A	A	B	A	A	A	B	A	B	B	A	B	B	A	H	B	B	B	A	A
Excalibur_c29707_318	1B	0		B	A	H	B	A	H	B	B	A	A	A	H	A	A	B	B	B	B	A	B	B	B	A	A	A	B	B	B	B	B	B	B	B	A	A	B	B	A	A	B	B	B	B	A	A	B
RAC875_c400_1363	1B	0.0001		B	A	-	B	A	-	B	B	A	A	A	-	A	A	B	B	B	B	A	B	B	B	A	A	A	B	B	B	B	B	B	B	B	A	A	B	B	A	A	B	B	B	B	A	A	B
BS00050522_51	1B	0.5883	1433745	B	A	H	B	A	H	B	B	A	A	A	H	A	A	B	B	B	B	A	B	B	B	A	A	A	B	B	B	B	B	B	B	B	A	A	B	B	A	A	B	B	B	B	A	A	B
Kukri_c36151_170	1B	13.7638	9555753	A	A	H	A	H	B	B	B	A	B	A	B	A	A	B	B	A	B	B	B	B	B	A	A	A	B	B	B	B	B	B	B	H	A	A	B	B	A	A	B	B	B	H	A	B	B
wsnp_BE405749B_Ta_2_1	1B	13.7638	9078284	A	A	-	A	-	B	B	B	A	B	A	B	A	A	B	B	A	B	B	B	B	B	A	A	A	B	B	B	B	B	B	B	A	A	A	B	B	A	A	B	B	B	-	A	B	B
Kukri_c92979_195	1B	14.9268	9711621	A	A	-	A	B	B	B	B	A	B	A	B	A	A	B	B	A	B	B	B	B	B	A	A	A	B	B	B	B	B	B	B	B	A	A	B	B	A	A	B	B	B	A	A	B	B
BS00011205_51	1B	43.5159		A	A	B	A	B	B	B	B	A	B	B	A	A	A	B	H	A	B	A	A	B	B	A	A	A	B	A	A	A	A	A	A	H	A	A	H	A	A	B	B	B	B	B	A	A	H
BS00022902_51	1B	43.5159	67540776	A	A	B	A	B	B	B	-	A	B	B	A	A	A	B	H	A	B	A	A	B	B	A	A	A	B	A	A	A	A	A	A	H	A	A	H	A	A	B	B	B	B	B	A	A	H
BS00022916_51	1B	43.5159	87733219	A	A	B	A	B	B	B	B	A	B	B	A	A	A	B	H	A	B	A	A	B	B	A	A	A	B	A	A	A	A	A	A	H	A	A	-	A	A	B	B	B	B	B	A	A	-
BS00025736_51	1B	43.5159	24539878	A	A	B	A	B	B	B	B	A	B	B	A	A	A	B	H	A	B	A	A	B	B	A	A	A	B	A	A	A	A	A	A	-	A	A	A	A	A	B	B	B	B	B	A	A	-
BS00065053_51	1B	43.5159	38833879	A	A	B	A	B	B	B	B	A	B	B	A	A	A	B	H	A	B	A	A	B	B	A	A	A	B	A	A	A	A	A	A	H	A	A	H	A	A	B	B	B	B	B	A	A	H
BS00065844_51	1B	43.5159		A	A	B	A	B	B	B	B	A	B	B	A	A	A	B	H	A	B	A	A	B	B	A	A	A	B	A	A	A	A	A	A	H	A	A	H	A	A	B	B	B	B	B	A	A	H
BS00067003_51	1B	43.5159	39457185	A	A	B	A	B	B	B	B	A	B	B	A	A	A	B	H	A	B	A	A	B	B	A	A	A	B	A	A	A	A	A	A	H	A	A	H	A	A	B	B	B	B	B	A	A	H
BS00087784_51	1B	43.5159	50777978	A	A	B	A	B	B	B	B	A	B	B	A	A	A	B	H	A	B	A	A	B	B	A	A	A	B	A	A	A	A	A	A	H	A	A	H	A	A	B	B	B	B	B	A	A	H
CAP8_rep_c9642_82	1B	43.5159	37481346	A	A	B	A	B	B	B	B	A	B	B	A	A	A	B	H	A	B	A	A	B	B	A	A	A	B	A	A	A	A	A	A	H	A	A	H	A	A	B	B	B	B	B	A	A	H
D_contig25392_201	1B	43.5159	31425108	A	A	B	A	B	B	B	B	A	B	B	A	A	A	B	H	A	B	A	A	B	B	A	A	A	B	A	A	A	A	A	A	H	A	A	H	A	A	B	B	B	B	B	A	A	H
Excalibur_c17202_1833	1B	43.5159	58325006	A	A	B	A	B	B	B	B	A	B	B	A	A	A	B	H	A	B	A	A	B	B	A	A	A	B	A	A	A	A	A	A	H	A	A	H	A	A	B	B	B	B	B	A	A	H
GENE-0427_442	1B	43.5159		A	A	B	A	B	B	B	B	A	B	B	A	A	A	B	A	A	B	A	A	B	B	A	A	A	B	A	A	A	A	A	A	A	A	A	A	A	A	B	B	B	B	B	A	A	A
IAAV7915	1B	43.5159	36536642	A	A	B	A	B	B	B	B	A	B	B	A	A	A	B	-	A	B	A	A	B	B	A	A	A	B	A	A	A	A	A	A	-	A	A	-	A	A	B	B	B	B	B	A	A	-
IAAV8952	1B	43.5159		A	A	B	A	B	B	B	B	A	B	B	A	A	A	B	H	A	B	A	A	B	B	A	A	A	B	A	A	A	A	A	A	H	A	A	H	A	A	B	B	B	B	B	A	A	H
Kukri_c47342_73	1B	43.5159	22959310	A	A	B	A	B	B	B	B	A	B	B	A	A	A	B	H	A	B	A	A	B	B	A	A	A	B	A	A	A	A	A	A	H	A	A	-	A	A	B	B	B	B	B	A	A	H
Kukri_c5861_360	1B	43.5159	70327929	A	A	B	A	B	B	B	B	A	B	B	A	A	A	B	H	A	B	A	A	B	B	A	A	A	B	A	A	A	A	A	A	H	A	A	H	A	A	B	B	B	B	B	A	A	-
Kukri_rep_c100936_449	1B	43.5159	40199660	A	A	B	A	B	B	B	B	A	B	B	A	A	A	B	H	A	B	A	A	B	B	A	A	A	B	A	A	A	A	A	A	-	A	A	-	A	A	B	B	B	B	B	A	A	H
RAC875_c826_839	1B	43.5159	39946461	A	A	B	A	B	B	B	B	A	B	B	A	A	A	B	H	A	B	A	A	B	B	A	A	A	B	A	A	A	A	A	A	H	A	A	H	A	A	B	B	B	B	B	A	A	H
RAC875_c8271_1352	1B	43.5159		A	A	B	A	B	B	B	B	A	B	B	A	A	A	B	H	A	B	A	A	B	B	A	A	A	B	A	A	A	A	A	A	H	A	A	H	A	A	B	B	B	B	B	A	A	H
RAC875_c8271_1469	1B	43.5159	36534932	A	A	B	A	B	B	B	B	A	B	B	A	A	A	B	H	A	B	A	A	B	B	A	A	A	B	A	A	A	A	A	A	H	A	A	H	A	A	B	B	B	B	B	A	A	H
RAC875_rep_c96733_369	1B	43.5159	36536786	A	A	B	A	B	B	B	B	A	B	B	A	A	A	B	H	A	B	A	A	B	B	A	A	A	B	A	A	A	A	A	A	H	A	A	H	A	A	B	B	B	B	B	A	A	H
RFL_Contig2160_617	1B	43.5159	29482820	A	A	B	A	B	B	B	B	A	B	B	A	A	A	B	H	A	B	A	A	B	B	A	A	A	B	A	A	A	A	A	A	H	A	A	H	A	A	B	B	B	B	B	A	A	H
RFL_Contig529_963	1B	43.5159		A	A	B	A	B	B	B	B	A	B	B	A	A	A	B	-	A	B	A	A	B	B	A	A	A	B	A	A	A	A	A	A	-	A	A	-	A	A	B	B	B	B	B	A	A	-
TA004123-0331	1B	43.5159		A	A	B	A	B	B	B	B	A	B	B	A	A	A	B	H	A	B	A	A	B	B	A	A	A	B	A	A	A	A	A	A	H	A	A	H	A	A	B	B	B	B	B	A	A	H
Tdurum_contig75938_1546	1B	43.5159	57003478	A	A	B	A	B	B	B	B	A	B	B	A	A	A	B	H	A	B	A	A	B	B	A	A	A	B	A	A	A	A	A	A	H	A	A	H	A	A	B	B	B	B	B	A	A	H
wsnp_Ex_c12063_19310114	1B	43.5159	32894161	A	A	B	A	B	B	B	B	A	B	B	A	A	A	B	H	A	B	A	A	B	B	A	A	A	B	A	A	A	A	A	A	H	A	A	H	A	A	B	B	B	B	B	A	A	H
wsnp_Ex_c2111_3963161	1B	43.5159		A	A	B	A	B	B	B	-	A	B	B	A	A	A	B	H	A	B	A	A	B	B	A	A	A	B	A	A	A	A	A	A	H	A	A	H	A	A	B	B	B	B	B	A	A	H
wsnp_Ex_c25782_35041189	1B	43.5159	63054133	A	A	B	A	B	B	B	B	A	B	B	A	A	A	B	H	A	B	A	A	B	B	A	A	A	B	A	A	A	A	A	A	H	A	A	H	A	A	B	B	B	B	B	A	A	H
wsnp_Ex_c28287_37424983	1B	43.5159	34173497	A	A	B	A	B	B	B	B	A	B	B	A	A	A	B	-	A	B	A	A	B	B	A	A	A	B	A	A	A	A	A	A	-	A	A	-	A	A	B	B	B	B	B	A	A	-
wsnp_Ex_c6417_11155739	1B	43.5159	56314807	A	A	B	A	B	B	B	H	A	B	B	A	A	A	B	H	A	B	A	A	B	B	A	A	A	B	A	A	A	A	A	A	H	A	A	H	A	A	B	B	B	B	B	A	A	H
wsnp_Ku_c11987_19473636	1B	43.5159	56313047	A	A	B	A	B	B	B	-	A	B	B	A	A	A	B	H	A	B	A	A	B	B	A	A	A	B	A	A	A	A	A	A	H	A	A	H	A	A	B	B	B	B	B	A	A	H
BS00067247_51	1B	52.6438		A	A	B	A	A	B	B	A	B	A	B	A	A	A	B	A	B	B	A	A	B	B	A	A	B	B	B	A	A	A	A	A	A	A	A	A	A	A	B	B	B	B	B	A	B	A
Ku_c11813_215	1B	52.6438	307428422	A	A	B	A	A	B	B	A	B	H	B	A	A	A	B	H	B	B	A	A	B	B	A	A	B	B	B	A	A	A	A	A	H	A	A	A	A	A	B	B	B	B	B	A	B	H
IAAV1158	1B	53.2611	364419100	A	A	B	A	A	B	A	A	B	H	B	A	A	H	B	H	B	B	A	A	B	B	A	A	B	B	B	A	A	A	A	A	H	A	A	A	A	A	B	B	B	B	B	A	B	H
wsnp_Ex_c26419_35667216	1B	53.2611	364419460	A	A	B	A	A	B	A	A	B	H	B	A	A	H	B	H	B	B	A	A	B	B	A	A	B	B	B	A	A	A	A	A	H	A	A	A	A	A	B	B	B	B	B	A	B	H
BS00093841_51	1B	54.5113	428069270	A	A	B	A	A	B	A	A	B	H	B	A	A	H	B	H	B	B	A	H	B	A	A	A	B	B	B	A	A	A	A	A	H	A	A	A	B	A	B	B	B	B	B	A	B	A
BS00032364_51	1B	55.7462	447166794	A	A	A	A	A	B	A	-	B	H	B	A	A	H	B	H	B	B	A	H	B	A	B	A	B	B	B	A	A	A	A	A	H	A	A	A	B	A	B	B	B	B	B	A	B	A
BS00073132_51	1B	55.7462	446630745	A	A	A	A	A	B	A	A	B	H	B	A	A	H	B	H	B	B	A	H	B	A	B	A	B	B	B	A	A	A	A	A	H	A	A	A	B	A	B	B	B	B	B	A	B	A
BS00073530_51	1B	55.7462	444863033	A	A	A	A	A	B	A	A	B	H	B	A	A	H	B	H	B	B	A	H	B	A	B	A	B	B	B	A	A	A	A	A	H	A	A	A	B	A	B	B	B	B	B	A	B	A
Ku_c6201_2890	1B	55.7462	452316860	A	A	A	A	A	B	A	A	B	H	B	A	A	H	B	H	B	B	A	H	B	A	B	A	B	B	B	A	A	A	A	A	H	A	A	A	B	A	B	B	B	B	B	A	B	A
Kukri_c4951_503	1B	55.7462	449131796	A	A	A	A	A	B	A	A	B	H	B	A	A	H	B	H	B	B	A	H	B	A	B	A	B	B	B	A	A	A	A	A	H	A	A	A	B	A	B	B	B	B	B	A	B	A
wsnp_Ex_c17452_26163496	1B	55.7462		A	A	A	A	A	B	A	H	B	H	B	A	A	H	B	H	B	B	A	H	B	A	B	A	B	B	B	A	A	A	A	A	H	A	A	A	B	A	B	B	B	B	B	A	B	A
wsnp_Ex_c22006_31180883	1B	55.7462	451076976	A	A	A	A	A	B	A	A	B	H	B	A	A	H	B	H	B	B	A	H	B	A	B	A	B	B	B	A	A	A	A	A	H	A	A	A	B	A	B	B	B	B	B	A	B	A
wsnp_Ex_c22006_31181239	1B	55.7462	451077332	A	A	A	A	A	B	A	A	B	H	B	A	A	H	B	H	B	B	A	H	B	A	B	A	B	B	B	A	A	A	A	A	H	A	A	A	B	A	B	B	B	B	B	A	B	A
wsnp_Ex_c52474_56060204	1B	55.7462	450611029	A	A	A	A	A	B	A	A	B	H	B	A	A	H	B	H	B	B	A	H	B	A	B	A	B	B	B	A	A	A	A	A	H	A	A	A	B	A	B	B	B	B	B	A	B	A
BobWhite_c28635_785	1B	56.3635		A	A	A	A	A	B	A	A	B	B	B	A	A	-	B	-	B	B	A	-	B	A	B	A	B	B	B	A	A	A	A	A	-	A	A	A	B	A	B	B	B	B	B	A	B	A
BS00095568_51	1B	56.3635	470000745	A	A	A	A	A	B	A	A	B	H	B	A	A	H	B	H	B	B	A	H	B	A	B	A	B	B	B	A	A	A	A	A	H	A	A	A	B	A	B	B	B	B	B	A	B	A
IAAV5704	1B	56.3635	457460601	A	A	A	A	A	B	A	A	B	-	B	A	A	H	B	-	B	B	A	-	B	A	B	A	B	B	B	A	A	A	A	A	-	A	A	A	B	A	B	B	B	B	B	A	B	A
TA004407-0898	1B	56.3635	478055163	A	A	A	A	A	B	A	-	B	H	B	A	A	H	B	H	B	B	A	H	B	A	B	A	B	B	B	A	A	A	A	A	H	A	A	A	B	A	B	B	B	B	B	A	B	A
Tdurum_contig60052_184	1B	56.3635		A	A	A	A	A	B	A	H	B	H	B	A	A	H	B	H	B	B	A	H	B	A	B	A	B	B	B	A	A	A	A	A	H	A	A	A	B	A	B	B	B	B	B	A	B	A
wsnp_CAP7_c940_480745	1B	56.3635	457460601	A	A	A	A	A	B	A	A	B	H	B	A	A	H	B	H	B	B	A	H	B	A	B	A	B	B	B	A	A	A	A	A	H	A	A	A	B	A	B	B	B	B	B	A	B	A
wsnp_Ex_rep_c66883_65286958	1B	56.3635	464710589	A	A	A	A	A	B	A	A	B	-	B	A	A	B	B	B	B	B	A	B	B	A	B	A	B	B	B	A	A	A	A	A	B	A	A	A	B	A	B	B	B	B	B	A	B	A
wsnp_Ku_c24323_34285350	1B	56.3635	474118005	A	A	A	A	A	B	A	A	B	H	B	A	A	H	B	H	B	B	A	H	B	A	B	A	B	B	B	A	A	A	A	A	H	A	A	A	B	A	B	B	B	B	B	A	B	A
Ra_c68984_1882	1B	56.9733	480974301	A	A	A	A	A	B	A	A	B	H	B	A	A	H	B	H	B	B	A	H	B	A	B	A	B	B	B	A	A	A	A	A	H	A	A	A	B	A	B	B	B	B	B	A	B	A
BS00022920_51	1B	57.583	492224083	A	A	A	A	A	B	A	A	B	H	B	A	A	H	B	H	B	B	A	H	B	A	B	A	B	B	B	A	A	A	A	B	H	A	A	A	B	A	B	B	B	B	B	A	B	A
BS00041355_51	1B	57.583	489994213	A	A	A	A	A	B	A	A	B	H	B	A	A	H	B	H	B	B	A	H	B	A	B	A	B	B	B	A	A	A	A	B	H	A	A	A	B	A	B	B	B	B	B	A	B	A
CAP11_c2974_53	1B	57.583	505068590	A	A	A	A	A	B	A	A	B	H	B	A	A	H	B	H	B	B	A	H	B	A	B	A	B	B	B	A	A	A	A	B	H	A	A	A	B	A	B	B	B	B	B	A	B	A
CAP7_c12162_251	1B	57.583	521218985	A	A	A	A	A	B	A	A	B	H	B	A	A	H	B	H	B	B	A	H	B	A	B	A	B	B	B	A	A	A	A	B	H	A	A	A	B	A	B	B	B	B	B	A	B	A
Excalibur_c34625_281	1B	57.583	379475784	A	A	A	A	A	B	A	A	B	H	B	A	A	H	B	H	B	B	A	H	B	A	B	A	B	B	B	A	A	A	A	B	H	A	A	A	B	A	B	B	B	B	B	A	B	A
Excalibur_c5218_75	1B	57.583	497799279	A	A	A	A	A	B	A	A	B	-	B	A	A	H	B	-	B	B	A	-	B	A	B	A	B	B	B	A	A	A	A	B	H	A	A	A	B	A	B	B	B	B	B	A	B	A
Excalibur_rep_c103109_88	1B	57.583	520522472	A	A	A	A	A	B	A	A	B	H	B	A	A	H	B	H	B	B	A	H	B	A	B	A	B	B	B	A	A	A	A	B	H	A	A	A	B	A	B	B	B	B	B	A	B	A
GENE-0107_807	1B	57.583	488217103	A	A	A	A	A	B	A	A	B	H	B	A	A	H	B	H	B	B	A	H	B	A	B	A	B	B	B	A	A	A	A	B	H	A	A	A	B	A	B	B	B	B	B	A	B	A
IAAV6731	1B	57.583	493868052	A	A	A	A	A	B	A	A	B	H	B	A	A	H	B	H	B	B	A	H	B	A	B	A	B	B	B	A	A	A	A	B	H	A	A	A	B	A	B	B	B	B	B	A	B	A
IACX3408	1B	57.583	489134006	A	A	A	A	A	B	A	A	B	H	B	A	A	H	B	H	B	B	A	H	B	A	B	A	B	B	B	A	A	A	A	B	H	A	A	A	B	A	B	B	B	B	B	A	B	A
JD_c3116_778	1B	57.583	492789034	A	A	A	A	A	B	A	A	B	H	B	A	A	H	B	H	B	B	A	H	B	A	B	A	B	B	B	A	A	A	A	B	H	A	A	A	B	A	B	B	B	B	B	A	B	A
Kukri_c13188_256	1B	57.583	511213188	A	A	A	A	A	B	A	A	B	H	B	A	A	H	B	H	B	B	A	H	B	A	B	A	B	B	B	A	A	A	A	B	H	A	A	A	B	A	B	B	B	B	B	A	B	A
Kukri_c22155_1010	1B	57.583	520926006	A	A	A	A	A	B	A	A	B	-	B	A	A	H	B	H	B	B	A	H	B	A	B	A	B	B	B	A	A	A	A	B	H	A	A	A	B	A	B	B	B	B	B	A	B	A
Kukri_c4412_383	1B	57.583		A	A	A	A	A	B	A	A	B	-	B	A	A	H	B	H	B	B	A	-	B	A	B	A	B	B	B	A	A	A	A	B	-	A	A	A	B	A	B	B	B	B	B	A	B	A
Ra_c37969_549	1B	57.583	494159220	A	A	A	A	A	B	A	A	B	H	B	A	A	H	B	H	B	B	A	H	B	A	B	A	B	B	B	A	A	A	A	B	H	A	A	A	B	A	B	B	B	B	B	A	B	A
Ra_c6701_506	1B	57.583		A	A	A	A	A	B	A	A	B	H	B	A	A	H	B	H	B	B	A	H	B	A	B	A	B	B	B	A	A	A	A	B	H	A	A	A	B	A	B	B	B	B	B	A	B	A
RAC875_c6701_291	1B	57.583	520785574	A	A	A	A	A	B	A	A	B	H	B	A	A	H	B	H	B	B	A	-	B	A	B	A	B	B	B	A	A	A	A	B	H	A	A	A	B	A	B	B	B	B	B	A	B	A
RAC875_rep_c119728_146	1B	57.583	472142928	A	A	A	A	A	B	A	-	B	H	B	A	A	H	B	H	B	B	A	H	B	A	B	A	B	B	B	A	A	A	A	B	H	A	A	A	B	A	B	B	B	B	B	A	B	A
RAC875_rep_c98040_163	1B	57.583	482769470	A	A	A	A	A	B	A	A	B	H	B	A	A	H	B	H	B	B	A	H	B	A	B	A	B	B	B	A	A	A	A	B	H	A	A	A	B	A	B	B	B	B	B	A	B	A
TA003725-0553	1B	57.583	496095847	A	A	A	A	A	B	A	H	B	H	B	A	A	H	B	H	B	B	A	H	B	A	B	A	B	B	B	A	A	A	A	B	H	A	A	A	B	A	B	B	B	B	B	A	B	A
TA003900-0407	1B	57.583	501366195	A	A	A	A	A	B	A	A	B	H	B	A	A	H	B	H	B	B	A	H	B	A	B	A	B	B	B	A	A	A	A	B	H	A	A	A	B	A	B	B	B	B	B	A	B	A
Tdurum_contig50473_889	1B	57.583	521225061	A	A	A	A	A	B	A	A	B	H	B	A	A	H	B	H	B	B	A	H	B	A	B	A	B	B	B	A	A	A	A	B	H	A	A	A	B	A	B	B	B	B	B	A	B	A
Tdurum_contig60509_232	1B	57.583	510980575	A	A	A	A	A	B	A	A	B	H	B	A	A	H	B	H	B	B	A	H	B	A	B	A	B	B	B	A	A	A	A	B	H	A	A	A	B	A	B	B	B	B	B	A	B	A
Tdurum_contig81102_102	1B	57.583	497781690	A	A	A	A	A	B	A	A	B	H	B	A	A	H	B	H	B	B	A	H	B	A	B	A	B	B	B	A	A	A	A	B	H	A	A	A	B	A	B	B	B	B	B	A	B	A
tplb0024i15_1754	1B	57.583	491087439	A	A	A	A	A	B	A	A	B	H	B	A	A	H	B	H	B	B	A	H	B	A	B	A	B	B	B	A	A	A	A	B	H	A	A	A	B	A	B	B	B	B	B	A	B	A
wsnp_Ex_c53976_57027635	1B	57.583	520525807	A	A	A	A	A	B	A	H	B	H	B	A	A	H	B	H	B	B	A	H	B	A	B	A	B	B	B	A	A	A	A	B	H	A	A	A	B	A	B	B	B	B	B	A	B	A
wsnp_Ra_c19148_28288923	1B	57.583	511449170	A	A	A	A	A	B	A	A	B	H	B	A	A	H	B	H	B	B	A	H	B	A	B	A	B	B	B	A	A	A	A	B	H	A	A	A	B	A	B	B	B	B	B	A	B	A
wsnp_Ra_c29782_39115548	1B	57.583	510980841	A	A	A	A	A	B	A	A	B	H	B	A	A	H	B	H	B	B	A	H	B	A	B	A	B	B	B	A	A	A	A	B	H	A	A	A	B	A	B	B	B	B	B	A	B	A
wsnp_Ra_c5088_9081927	1B	57.583	520527951	A	A	A	A	A	B	A	A	B	H	B	A	A	H	B	H	B	B	A	H	B	A	B	A	B	B	B	A	A	A	A	B	H	A	A	A	B	A	B	B	B	B	B	A	B	A
Excalibur_c48379_461	1B	59.4357		A	A	A	A	A	B	A	A	B	B	B	B	A	H	B	H	B	B	A	H	B	A	B	A	B	B	B	A	A	B	B	B	A	A	A	A	B	A	B	B	B	B	B	A	B	A
GENE-0120_397	1B	60.6555	551013055	A	A	A	A	A	B	A	A	B	H	B	B	A	H	B	H	B	B	A	H	B	A	B	A	B	B	B	A	A	B	B	B	A	A	A	A	B	A	B	B	B	B	H	A	B	A
IAAV3567	1B	60.6555	545207215	A	A	A	A	A	B	A	A	B	H	B	B	A	H	B	H	B	B	A	H	B	A	B	A	B	B	B	A	A	B	B	B	A	A	A	A	B	A	B	B	B	B	H	A	B	A
RAC875_c95548_156	1B	60.6555	551033002	A	A	A	A	A	B	A	A	B	H	B	B	A	H	B	H	B	B	A	H	B	A	B	A	B	B	B	A	A	B	B	B	A	A	A	A	B	A	B	B	B	B	H	A	B	A
RAC875_rep_c109215_398	1B	60.6555		A	A	A	A	A	B	A	A	B	-	B	B	A	-	B	-	B	B	A	-	B	A	B	A	B	B	B	A	A	B	B	B	A	A	A	A	B	A	B	B	B	B	-	A	B	A
TA004081-0677	1B	60.6555		A	A	A	A	A	B	A	A	B	H	B	B	A	H	B	H	B	B	A	H	B	A	B	A	B	B	B	A	A	B	B	B	A	A	A	A	B	A	B	B	B	B	H	A	B	A
Tdurum_contig42749_3287	1B	60.6555		A	A	A	A	A	B	A	A	B	H	B	B	A	H	B	H	B	B	A	H	B	A	B	A	B	B	B	A	A	B	B	B	A	A	A	A	B	A	B	B	B	B	H	A	B	A
Tdurum_contig42797_2922	1B	60.6555		A	A	A	A	A	B	A	-	B	-	B	B	A	-	B	H	B	B	A	H	B	A	B	A	B	B	B	A	A	B	B	B	A	A	A	A	B	A	B	B	B	B	H	A	B	A
wsnp_Ex_c1440_2764867	1B	60.6555	551177522	A	A	A	A	A	B	A	A	B	H	B	B	A	H	B	H	B	B	A	H	B	A	B	A	B	B	B	A	A	B	B	B	A	A	A	A	B	A	B	B	B	B	H	A	B	A
wsnp_Ex_c18462_27305612	1B	60.6555	409793597	A	A	A	A	A	B	A	A	B	H	B	B	A	H	B	H	B	B	A	H	B	A	B	A	B	B	B	A	A	B	B	B	A	A	A	A	B	A	B	B	B	B	H	A	B	A
wsnp_Ku_c23096_32987510	1B	60.6555		A	A	A	A	A	B	A	H	B	H	B	B	A	H	B	H	B	B	A	H	B	A	B	A	B	B	B	A	A	B	B	B	A	A	A	A	B	A	B	B	B	B	H	A	B	A
Tdurum_contig30517_174	1B	64.5595	566838861	B	A	B	A	A	B	A	A	B	A	B	B	A	H	B	H	B	B	A	H	B	A	B	A	B	B	A	A	A	B	B	B	A	A	A	A	B	A	B	B	B	B	H	A	B	A
BobWhite_c14141_197	1B	65.7645	581209728	B	A	B	B	A	B	A	-	B	A	B	B	A	H	B	H	A	B	A	H	B	A	B	A	B	B	A	A	A	B	B	H	A	A	A	A	B	A	B	B	B	B	H	A	B	A
BS00022551_51	1B	65.7645	583446335	B	A	B	B	A	B	A	A	B	A	B	B	A	H	B	H	A	B	A	H	B	A	B	A	B	B	A	A	A	B	B	H	A	A	A	A	B	A	B	B	B	B	H	A	B	A
BS00067627_51	1B	65.7645	580538027	B	A	B	B	A	B	A	A	B	A	B	B	A	H	B	H	A	B	A	H	B	A	B	A	B	B	A	A	A	B	B	H	A	A	A	A	B	A	B	B	B	B	H	A	B	A
Excalibur_c64439_87	1B	65.7645		B	A	B	B	A	B	A	A	B	A	B	B	A	H	B	H	A	B	A	H	B	A	B	A	B	B	A	A	A	B	B	H	A	A	A	A	B	A	B	B	B	B	H	A	B	A
Kukri_c20486_255	1B	65.7645		B	A	B	B	A	B	A	A	B	A	B	B	A	H	B	H	A	B	A	H	B	A	B	A	B	B	A	A	A	B	B	H	A	A	A	A	B	A	B	B	B	B	H	A	B	A
Kukri_c25961_166	1B	65.7645	575863908	B	A	B	B	A	B	A	A	B	A	B	B	A	H	B	H	A	B	A	H	B	A	B	A	B	B	A	A	A	B	B	H	A	A	A	A	B	A	B	B	B	B	H	A	B	A
Kukri_c8143_355	1B	65.7645	581201928	B	A	B	B	A	B	A	A	B	A	B	B	A	H	B	H	A	B	A	H	B	A	B	A	B	B	A	A	A	B	B	H	A	A	A	A	B	A	B	B	B	B	H	A	B	A
Kukri_c9752_793	1B	65.7645	581205643	B	A	B	B	A	B	A	A	B	A	B	B	A	H	B	H	A	B	A	H	B	A	B	A	B	B	A	A	A	B	B	H	A	A	A	A	B	A	B	B	B	B	H	A	B	A
RAC875_rep_c106876_558	1B	65.7645		B	A	B	B	A	B	A	A	B	A	B	B	A	H	B	H	A	B	A	H	B	A	B	A	B	B	A	A	A	B	B	B	A	A	A	A	B	A	B	B	B	B	H	A	B	A
Tdurum_contig11896_550	1B	65.7645	527951876	B	A	B	B	A	B	A	A	B	A	B	B	A	H	B	H	A	B	A	H	B	A	B	A	B	B	A	A	A	B	B	H	A	A	A	A	B	A	B	B	B	B	H	A	B	A
Tdurum_contig13117_1316	1B	65.7645	573571920	B	A	B	B	A	B	A	A	B	A	B	B	A	H	B	H	A	B	A	H	B	A	B	A	B	B	A	A	A	B	B	B	A	A	A	A	B	A	B	B	B	B	H	A	B	A
Tdurum_contig69792_167	1B	65.7645	581205643	B	A	B	B	A	B	A	A	B	A	B	B	A	-	B	-	A	B	A	A	B	A	B	A	B	B	A	A	A	B	B	-	A	A	A	A	B	A	B	B	B	B	-	A	B	A
BS00022775_51	1B	72.3819	604553155	B	A	B	A	A	B	A	H	B	A	B	B	A	H	B	B	A	B	A	H	B	A	B	A	B	B	A	A	B	B	B	B	A	A	A	B	B	A	B	B	B	A	H	A	B	A
BS00064162_51	1B	72.3819		B	A	B	A	A	B	A	A	B	A	B	B	A	H	B	B	A	B	A	H	B	A	B	A	B	B	A	A	B	B	B	B	A	A	A	B	B	A	B	B	B	A	H	A	B	A
Excalibur_rep_c107047_469	1B	72.3819	603302106	B	A	B	A	A	B	A	A	B	A	B	B	A	H	B	B	A	B	A	H	B	A	B	A	B	B	A	A	B	B	B	B	A	A	A	B	B	A	B	B	B	A	H	A	B	A
Excalibur_rep_c107047_605	1B	72.3819	603302242	B	A	B	A	A	B	A	A	B	A	B	B	A	A	B	B	A	B	A	A	B	A	B	A	B	B	A	A	B	B	B	B	A	A	A	B	B	A	B	B	B	A	A	A	B	A
Excalibur_rep_c107047_742	1B	72.3819	603302379	B	A	B	A	A	B	A	A	B	A	B	B	A	H	B	B	A	B	A	H	B	A	B	A	B	B	A	A	B	B	B	B	A	A	A	B	B	A	B	B	B	A	H	A	B	A
Tdurum_contig96049_200	1B	72.3819	603753358	B	A	B	A	A	B	A	A	B	A	B	B	A	H	B	B	A	B	A	H	B	A	B	A	B	B	A	A	B	B	B	B	A	A	A	B	B	A	B	B	B	A	H	A	B	A
BobWhite_c42716_71	1B	72.9771		B	A	B	A	A	B	A	A	B	A	B	B	A	H	B	B	A	B	A	H	B	A	B	A	B	B	A	A	B	B	B	B	A	A	A	B	B	A	B	B	B	A	H	A	B	A
BobWhite_c48071_144	1B	72.9771	614455863	B	A	B	A	A	B	A	A	B	A	B	B	A	H	B	B	A	B	A	H	B	A	B	A	B	B	A	A	B	B	B	B	A	A	A	B	B	A	B	B	B	A	H	A	B	A
BS00064349_51	1B	72.9771	544431362	B	A	B	A	A	B	A	A	B	A	B	B	A	H	B	B	A	B	A	H	B	A	B	A	B	B	A	A	B	B	B	B	A	A	A	B	B	A	B	B	B	A	H	A	B	A
BS00066278_51	1B	72.9771	544431360	B	A	B	A	A	B	A	H	B	A	B	B	A	H	B	B	A	B	A	H	B	A	B	A	B	B	A	A	B	B	B	B	A	A	A	B	B	A	B	B	B	A	H	A	B	A
BS00067436_51	1B	72.9771		B	A	B	A	A	B	A	A	B	A	B	B	A	H	B	B	A	B	A	H	B	A	B	A	B	B	A	A	B	B	B	B	A	A	A	B	B	A	B	B	B	A	-	A	B	A
BS00110231_51	1B	72.9771		B	A	B	A	A	B	A	A	B	A	B	B	A	H	B	B	A	B	A	-	B	A	B	A	B	B	A	A	B	B	B	B	A	A	A	B	B	A	B	B	B	A	H	A	B	A
Excalibur_c28045_741	1B	72.9771		B	A	B	A	A	B	A	A	B	A	B	B	A	H	B	B	A	B	A	H	B	A	B	A	B	B	A	A	B	B	B	B	A	A	A	B	B	A	B	B	B	A	H	A	B	A
Excalibur_c93510_360	1B	72.9771	614789719	B	A	B	A	A	B	A	-	B	A	B	B	A	H	B	B	A	B	A	H	B	A	B	A	B	B	A	A	B	B	B	B	A	A	A	B	B	A	B	B	B	A	H	A	B	A
Excalibur_rep_c72368_68	1B	72.9771		B	A	B	A	A	B	A	A	B	A	B	B	A	-	B	B	A	B	A	B	B	A	B	A	B	B	A	A	B	B	B	B	A	A	A	B	B	A	B	B	B	A	-	A	B	A
GENE-0506_129	1B	72.9771	615126043	-	A	B	A	A	B	A	A	B	A	B	B	A	H	B	B	A	B	A	H	B	A	B	A	B	B	A	A	B	B	B	B	A	A	A	B	B	A	B	B	B	A	H	A	B	A
IACX1891	1B	72.9771		B	A	B	A	A	B	A	A	B	A	B	B	A	H	B	B	A	B	A	H	B	A	B	A	B	B	A	A	B	B	B	B	A	A	A	B	B	A	B	B	B	A	H	A	B	A
Kukri_c19247_711	1B	72.9771	614455731	B	A	B	A	A	B	A	A	B	A	B	B	A	H	B	B	A	B	A	H	B	A	B	A	B	B	A	A	B	B	B	B	A	A	A	B	B	A	B	B	B	A	H	A	B	A
Kukri_c30461_857	1B	72.9771	614791406	B	A	B	A	A	B	A	A	B	A	B	B	A	H	B	B	A	B	A	H	B	A	B	A	B	B	A	A	B	B	B	B	A	A	A	B	B	A	B	B	B	A	H	A	B	A
RAC875_c47427_75	1B	72.9771	547967907	B	A	B	A	A	B	A	A	B	A	B	B	A	H	B	B	A	B	A	H	B	A	B	A	B	B	A	A	B	B	B	B	A	A	A	B	B	A	B	B	B	A	H	A	B	A
RAC875_c78619_523	1B	72.9771		B	A	B	A	A	B	A	A	B	A	B	B	A	H	B	B	A	B	A	H	B	A	B	A	B	B	A	A	B	B	B	B	A	A	A	B	B	A	B	B	B	A	H	A	B	A
RFL_Contig2736_827	1B	72.9771	615112103	B	A	B	A	A	B	A	H	B	A	B	B	A	H	B	B	A	B	A	H	B	A	B	A	B	B	A	A	B	B	B	B	A	A	A	B	B	A	B	B	B	A	H	A	B	A
RFL_Contig5937_1677	1B	72.9771		B	A	B	A	A	B	A	-	B	A	B	B	A	H	B	B	A	B	A	H	B	A	B	A	B	B	A	A	B	B	B	B	A	A	A	B	B	A	B	B	B	A	H	A	B	A
Tdurum_contig10362_328	1B	72.9771	614331924	B	A	B	A	A	B	A	A	B	A	B	B	A	H	B	B	A	B	A	H	B	A	B	A	B	B	A	A	B	B	B	B	A	A	A	B	B	A	B	B	B	A	H	A	B	A
Tdurum_contig15015_883	1B	72.9771	615126905	B	A	B	A	A	B	A	A	B	A	B	B	A	H	B	B	A	B	A	H	B	A	B	A	B	B	A	A	B	B	B	B	A	A	A	B	B	A	B	B	B	A	H	A	B	A
wsnp_BE590634B_Ta_2_1	1B	72.9771	615126686	B	A	B	A	A	B	A	A	B	A	B	B	A	H	B	B	A	B	A	H	B	A	B	A	B	B	A	A	B	B	B	B	A	A	A	B	B	A	B	B	B	A	H	A	B	A
wsnp_BE590634B_Ta_2_5	1B	72.9771	615126800	B	A	B	A	A	B	A	A	B	A	B	B	A	H	B	B	A	B	A	H	B	A	B	A	B	B	A	A	B	B	B	B	A	A	A	B	B	A	B	B	B	A	H	A	B	A
wsnp_Ex_c3147_5816957	1B	72.9771	615110494	B	A	B	A	A	B	A	-	B	A	B	B	A	H	B	B	A	B	A	H	B	A	B	A	B	B	A	A	B	B	B	B	A	A	A	B	B	A	B	B	B	A	H	A	B	A
wsnp_Ex_rep_c66255_64400455	1B	72.9771	623729891	B	A	B	A	A	B	A	A	B	A	B	B	A	H	B	B	A	B	A	H	B	A	B	A	B	B	A	A	B	B	B	B	A	A	A	B	B	A	B	B	B	A	H	A	B	A
wsnp_Ku_c56140_59771244	1B	72.9771	615126401	B	A	B	A	A	B	A	A	B	A	B	B	A	H	B	B	A	B	A	H	B	A	B	A	B	B	A	A	B	B	B	B	A	A	A	B	B	A	B	B	B	A	H	A	B	A
BS00074911_51	1B	73.5869	626226163	B	A	B	A	A	B	A	A	B	A	B	B	B	H	B	B	A	B	A	H	B	A	B	A	B	B	A	A	B	B	B	B	A	A	A	B	B	A	B	B	B	A	H	A	B	A
BobWhite_c26569_190	1B	76.1207	637498289	B	A	B	A	B	B	A	A	B	A	B	B	H	B	B	B	A	B	A	B	B	A	B	A	B	B	A	A	B	B	B	B	A	B	A	B	B	A	B	B	B	A	H	B	B	A
Excalibur_rep_c70674_83	1B	78.395	462488458	B	A	B	A	B	B	A	H	B	A	B	B	-	B	B	B	A	B	A	B	B	A	B	A	B	B	A	A	B	B	B	B	A	B	A	B	B	A	B	B	B	A	H	B	B	A
RAC875_c46093_492	1B	78.395	633333021	B	A	B	A	B	B	A	H	B	A	B	B	H	B	B	B	A	B	A	B	B	A	B	A	B	B	A	A	B	B	B	B	A	B	A	B	B	A	B	B	B	A	H	B	B	A
Tdurum_contig777_260	1B	78.395		B	A	B	A	B	B	A	A	B	A	B	B	B	B	B	B	A	B	A	B	B	A	B	A	B	B	A	A	B	B	B	B	A	B	A	B	B	A	B	B	B	A	B	B	B	A
BobWhite_c4375_347	1B	79.6001		B	A	B	A	B	B	A	B	B	A	B	B	H	B	B	B	A	B	A	H	B	A	B	A	B	B	A	A	B	B	B	B	A	B	A	B	B	A	B	B	B	A	H	A	B	A
IACX4411	1B	79.6001	630831715	B	A	B	A	B	B	A	B	B	A	B	B	H	B	B	B	A	B	A	H	B	A	B	A	B	B	A	A	B	B	B	B	A	B	A	B	B	A	B	B	B	A	H	A	B	A
Ra_c17685_927	1B	79.6001	631718534	B	A	B	A	B	B	A	B	B	A	B	B	-	B	B	B	A	B	A	H	B	A	B	A	B	B	A	A	B	B	B	B	A	B	A	B	B	A	B	B	B	A	H	A	B	A
RAC875_c42275_224	1B	79.6001	459837190	B	A	B	A	B	B	A	B	B	A	B	B	H	B	B	B	A	B	A	H	B	A	B	A	B	B	A	A	B	B	B	B	A	B	A	B	B	A	B	B	B	A	H	A	B	A
tplb0043k02_463	1B	79.6001	631833744	B	A	B	A	B	B	A	B	B	A	B	B	-	B	B	B	A	B	A	A	B	A	B	A	B	B	A	A	B	B	B	B	A	B	A	B	B	A	B	B	B	A	-	A	-	A
wsnp_JD_c20621_18304110	1B	79.6001	630832551	B	A	B	A	B	B	A	B	B	A	B	B	H	B	B	B	A	B	A	H	B	A	B	A	B	B	A	A	B	B	B	B	A	B	A	B	B	A	B	B	B	A	H	A	B	A
BobWhite_c2844_569	1B	80.7908	636753103	B	A	B	A	B	B	A	A	B	A	B	B	H	B	B	B	A	B	A	B	B	A	B	A	B	B	A	A	B	B	B	B	A	B	A	B	B	A	B	B	B	A	H	B	B	A
BS00039135_51	1B	80.7908	636753103	B	A	B	A	B	B	A	A	B	A	B	B	H	B	B	B	A	B	A	B	B	A	B	A	B	B	A	A	B	B	B	B	A	B	A	B	B	A	B	B	B	A	H	B	B	A
BS00094237_51	1B	80.7908	638015205	B	A	B	A	B	B	A	A	B	A	B	B	H	B	B	B	A	B	A	B	B	A	B	A	B	B	A	A	B	B	B	B	A	B	A	B	B	A	B	B	B	A	H	B	B	A
Kukri_c18109_331	1B	80.7908	636263306	B	A	B	A	B	B	A	A	B	A	B	B	H	B	B	B	A	B	A	B	B	A	B	A	B	B	A	A	B	B	B	B	A	B	A	B	B	A	B	B	B	A	H	B	B	A
Kukri_c51735_79	1B	80.7908	552166194	B	A	B	A	B	B	A	A	B	A	B	B	H	B	B	B	A	B	A	B	B	A	B	A	B	B	A	A	B	B	B	B	A	B	A	B	B	A	B	B	B	A	H	B	B	A
tplb0043a07_880	1B	80.7908	637622627	B	A	B	A	B	B	A	A	B	A	B	B	H	B	B	B	A	B	A	B	B	A	B	A	B	B	A	A	B	B	B	B	A	B	A	B	B	A	B	B	B	A	H	B	B	A
Excalibur_c63885_115	1B	84.6446	641632868	B	A	B	A	B	B	A	A	B	A	A	B	H	B	B	B	A	B	A	B	B	A	B	A	B	B	A	-	B	B	B	B	A	B	A	B	B	A	B	B	B	H	H	B	B	A
BS00084895_51	1B	88.4983	643101627	B	A	B	A	B	B	A	A	B	A	A	B	H	A	B	B	A	B	A	B	B	A	A	A	B	B	A	B	B	B	B	B	A	B	A	B	B	A	B	B	B	H	H	A	B	A
Ex_c25733_348	1B	88.4983		B	A	B	A	B	B	A	A	B	A	A	B	H	A	B	B	A	B	A	B	B	A	A	A	B	B	A	B	B	B	B	B	A	B	A	B	B	A	B	B	B	H	H	A	B	A
TA004668-0687	1B	88.4983	466366088	B	A	B	A	B	B	A	A	B	A	A	B	H	A	B	B	A	B	A	B	B	A	A	A	B	B	A	B	B	B	B	B	A	B	A	B	B	A	B	B	B	H	H	A	B	A
wsnp_Ku_c51703_56915288	1B	88.4983	643096819	B	A	B	A	B	B	A	A	B	A	A	B	H	A	B	B	A	B	A	B	B	A	A	A	B	B	A	B	B	B	B	B	A	B	A	B	B	A	B	B	B	H	H	A	B	A
CAP8_c5043_190	1B	101.269		A	A	B	A	A	A	A	H	B	A	A	A	H	A	B	B	A	B	A	B	B	A	A	B	B	B	B	A	B	B	B	B	B	B	A	B	A	B	B	B	B	H	A	A	B	B
tplb0034p10_1134	1B	101.269	655628284	A	A	B	A	A	A	A	A	B	A	A	A	H	A	B	B	A	B	A	B	B	A	A	B	B	B	B	A	B	B	B	B	B	B	A	B	A	B	B	B	B	H	A	A	B	B
CAP12_c1085_283	1B	113.61	661414363	A	A	B	A	A	A	A	A	A	A	-	A	H	A	B	-	A	H	A	B	A	A	A	B	B	B	A	A	H	A	A	B	B	B	B	B	A	B	B	B	B	A	A	A	H	B
GENE-0416_480	1B	114.861	476257353	A	A	B	A	A	A	A	A	A	A	A	A	H	A	B	B	A	H	A	B	A	A	A	B	B	B	B	A	H	A	A	B	B	B	B	B	A	B	B	B	B	A	A	A	H	B
IACX8074	1B	114.861	662556369	A	A	B	A	A	A	A	A	A	A	A	A	H	A	B	B	A	H	A	B	A	A	A	B	B	B	B	A	H	A	A	B	B	B	B	B	A	B	B	B	B	A	A	A	H	B
IACX9290	1B	114.861	662558114	A	A	B	A	A	A	A	A	A	A	A	A	H	A	B	B	A	H	A	B	A	A	A	B	B	B	B	A	H	A	A	B	B	B	B	B	A	B	B	B	B	A	A	A	H	B
IAAV5776	1B	123.914		A	A	B	A	B	A	A	A	A	A	A	A	B	B	B	H	A	-	A	B	A	A	A	B	B	B	B	A	H	A	B	B	A	B	B	B	A	-	B	B	B	A	A	A	B	B
BobWhite_c4482_73	1B	126.447	679030805	A	A	B	A	B	A	A	A	A	A	A	A	B	B	B	H	A	A	A	B	A	A	A	B	B	B	B	A	H	A	A	B	A	B	B	B	A	H	B	B	B	A	A	A	B	B
BS00036189_51	1B	126.447	486877128	A	A	B	H	B	A	A	A	A	A	A	A	B	B	B	H	A	A	A	B	A	A	A	B	B	B	B	A	H	A	A	B	A	B	B	B	A	H	B	B	B	A	A	A	B	B
Excalibur_c35289_64	1B	126.447	679299635	A	A	B	A	B	A	A	A	A	A	A	A	B	B	B	A	A	A	A	B	A	A	A	B	B	B	B	A	H	A	A	B	A	B	B	B	A	H	B	B	B	A	A	A	B	B
RFL_Contig785_535	1B	126.447		A	A	B	A	B	A	A	A	A	A	A	A	B	B	B	H	A	A	A	B	A	A	A	B	B	B	B	A	H	A	A	B	A	B	B	B	A	H	B	B	B	A	A	A	H	B
Tdurum_contig13879_919	1B	126.447	680163586	A	A	B	A	B	A	A	A	A	A	A	A	B	B	B	H	A	A	A	B	A	A	A	B	B	B	B	A	H	A	A	B	A	B	B	B	A	H	B	B	B	A	A	A	H	B
D_contig03023_692	1B	127.022	487624238	A	A	B	A	B	A	A	A	A	A	A	A	B	B	B	B	A	A	A	B	A	A	A	B	B	B	B	A	B	A	A	B	A	B	B	B	A	B	B	B	B	A	A	A	B	B
Tdurum_contig13879_352	1B	127.022	680162696	A	A	B	A	B	A	A	A	A	A	A	A	B	B	B	B	A	A	A	B	A	A	A	B	B	B	B	A	B	A	A	B	A	B	B	B	A	B	B	B	B	A	A	A	B	B
Tdurum_contig45965_563	1B	127.022		A	A	B	A	B	A	A	A	A	A	A	A	B	B	B	H	A	A	A	B	A	A	A	B	B	B	B	A	B	A	A	B	A	B	B	B	A	B	B	B	B	A	A	A	-	B
BS00063537_51	1B	128.767	678762514	A	A	B	A	B	A	A	A	A	A	A	A	B	B	B	-	A	A	A	B	A	A	A	B	B	B	B	A	A	A	A	B	A	B	B	B	A	A	B	B	B	A	A	A	A	B
BS00027006_51	1B	133.848	687720416	A	A	B	A	B	B	A	A	B	A	A	A	B	B	B	H	A	A	A	B	A	A	A	H	B	B	B	A	H	A	A	H	A	B	A	B	A	A	B	B	B	A	A	A	A	B
Excalibur_c25640_110	1B	133.848		A	A	B	A	B	B	A	A	B	A	A	A	B	B	B	H	A	A	A	B	A	A	A	H	B	B	B	A	H	A	A	H	A	B	A	B	A	A	B	B	B	A	A	A	H	B
Excalibur_c92298_213	1B	133.848		A	A	B	A	B	B	A	A	B	A	A	A	B	B	B	H	A	A	A	B	A	A	A	H	B	B	B	A	H	A	A	H	A	B	A	B	A	A	B	B	B	A	A	A	A	B
Tdurum_contig92835_177	1B	133.848	687423766	A	A	B	A	B	B	A	A	B	A	A	A	B	B	B	H	A	A	A	B	A	A	A	H	B	B	B	A	H	A	A	H	A	B	A	B	A	A	B	B	B	A	A	A	A	B
wsnp_Ex_c1597_3045682	1B	133.848	688283156	A	A	B	A	B	B	A	A	B	A	A	A	B	B	B	H	A	A	A	B	A	A	A	H	B	B	B	A	H	A	A	H	A	B	A	B	A	A	B	B	B	A	A	A	A	B
wsnp_Ku_c13952_22097856	1B	133.848	494149362	A	A	B	A	B	B	A	A	B	A	A	A	B	B	B	H	A	A	A	B	A	A	A	H	B	B	B	A	H	A	A	H	A	B	A	B	A	A	B	B	B	A	A	A	A	B
wsnp_Ku_c13952_22097895	1B	133.848	494149323	A	A	B	A	B	B	A	A	B	A	A	A	B	B	B	-	A	A	A	B	A	A	A	H	B	B	B	A	-	A	A	-	A	B	A	B	A	A	B	B	B	A	A	A	A	B
RAC875_c2070_566	1D	0	417199	B	B	A	A	B	B	A	B	A	A	B	A	H	A	A	A	B	B	B	B	A	B	H	A	A	B	A	A	B	B	B	B	B	B	A	B	A	B	A	A	A	A	B	B	A	A
wsnp_Ex_c41048_47969948	1D	0		B	B	A	A	B	B	A	B	A	A	B	A	-	A	A	A	B	B	B	B	A	B	H	A	A	B	A	A	B	B	B	B	B	B	A	B	A	B	A	A	A	A	B	B	A	A
BobWhite_c1715_887	1D	12.3904	8185596	B	A	A	H	B	B	B	B	A	A	H	A	A	A	A	A	B	A	B	B	A	B	A	A	A	B	A	A	B	B	B	A	B	B	B	B	A	B	A	A	B	A	B	B	B	B
BobWhite_rep_c49356_237	1D	12.3904	7877632	B	A	A	H	B	B	B	-	A	A	H	A	A	A	A	A	B	A	B	B	A	B	A	A	A	B	A	A	B	B	B	A	B	B	B	B	A	B	A	A	B	A	B	B	B	B
Ex_c13421_2094	1D	12.3904		B	A	A	H	B	B	B	B	A	A	H	A	A	A	A	A	B	A	B	B	A	B	A	A	A	B	A	A	B	B	B	A	B	B	B	B	A	B	A	A	B	A	B	B	B	B
Kukri_c837_436	1D	12.3904	8609839	B	A	A	H	B	B	B	B	A	A	H	A	A	A	A	A	B	A	B	B	A	B	A	A	A	B	A	A	B	B	B	A	B	B	B	B	A	B	A	A	B	A	B	B	B	B
TA004380-0362	1D	12.3904		B	A	A	H	B	B	B	B	A	A	-	A	A	A	A	A	B	A	B	B	A	B	A	A	A	B	A	A	B	B	B	A	B	B	B	B	A	B	A	A	B	A	B	B	B	B
wsnp_BE637971D_Ta_2_3	1D	12.3904	7948599	B	A	A	H	B	B	B	B	A	A	H	A	A	A	A	A	B	A	B	B	A	B	A	A	A	B	A	A	B	B	B	A	B	B	B	B	A	B	A	A	B	A	B	B	B	B
wsnp_Ex_c1085_2078944	1D	12.3904	8185547	B	A	A	H	B	B	B	B	A	A	H	A	A	A	A	A	B	A	B	B	A	B	A	A	A	B	A	A	B	B	B	A	B	B	B	B	A	B	A	A	B	A	B	B	B	B
wsnp_Ex_c1358_2600929	1D	12.3904	8605331	B	A	A	H	B	B	B	B	A	A	H	A	A	A	A	A	B	A	B	B	A	B	A	A	A	B	A	A	B	B	B	A	B	B	B	B	A	B	A	A	B	A	B	B	B	B
wsnp_Ex_c1358_2602235	1D	12.3904	8606637	B	A	A	H	B	B	B	B	A	A	H	A	A	A	A	A	B	A	B	B	A	B	A	A	A	B	A	A	B	B	B	A	B	B	B	B	A	B	A	A	B	A	B	B	B	B
wsnp_Ex_c1969_3705930	1D	12.3904	7874703	B	A	A	H	B	B	B	B	A	A	H	A	A	A	A	A	B	A	B	B	A	B	A	A	A	B	A	A	B	B	B	A	B	B	B	B	A	B	A	A	B	A	B	B	B	B
wsnp_Ku_c3682_6786230	1D	12.3904	8184870	B	A	A	B	B	B	B	B	A	A	B	A	A	A	A	A	B	A	B	B	A	B	A	A	A	B	A	A	B	B	B	A	B	B	B	B	A	B	A	A	B	A	B	B	B	B
RAC875_c16352_594	1D	17.4711	10382164	B	A	A	A	A	B	B	B	H	A	H	A	A	A	A	A	B	A	B	B	A	B	A	A	A	B	A	A	B	B	B	A	B	B	A	B	A	B	A	A	B	A	B	B	B	B
Excalibur_c15692_532	1D	18.0594	10398734	B	A	A	-	A	B	B	B	-	A	-	A	A	A	A	A	B	A	B	B	A	B	A	A	A	B	A	A	B	B	B	A	B	B	A	B	A	B	A	A	B	A	H	B	B	B
BobWhite_c33756_74	1D	18.6477	10383071	B	A	A	H	A	B	B	B	H	A	H	A	A	A	A	A	B	A	B	B	A	B	A	A	A	B	A	A	B	B	B	A	B	B	A	B	A	B	A	A	B	A	B	B	B	B
CAP8_c2401_433	1D	30.2817	11879726	H	A	A	B	A	B	B	B	H	A	H	A	A	A	A	A	A	A	B	A	A	A	A	A	A	B	A	A	B	B	B	A	A	B	A	B	A	B	B	A	A	A	A	A	B	B
Ku_c12842_664	1D	31.4183	12303425	-	A	A	B	A	B	B	B	-	A	-	A	A	A	A	A	A	A	B	A	A	A	A	A	A	B	A	A	B	B	B	A	A	B	A	B	A	B	B	A	A	A	A	A	B	B
Excalibur_c24303_1145	1D	35.9764		H	A	A	B	A	B	B	B	H	A	A	A	A	A	A	A	A	A	B	H	A	A	A	A	A	B	A	A	B	B	B	A	A	B	A	A	A	B	B	A	A	H	A	A	-	A
Excalibur_c48750_124	1D	35.9764	18066335	H	A	A	B	A	B	B	B	H	A	A	A	A	A	A	A	A	A	B	H	A	A	A	A	A	B	A	A	B	B	B	A	A	B	A	A	A	B	B	A	A	H	A	A	B	A
Kukri_c33670_261	1D	44.7314	20056265	H	A	B	B	A	B	B	A	A	A	A	A	B	A	A	A	A	A	B	H	B	A	A	A	A	B	A	B	B	B	B	B	A	B	A	A	A	B	B	A	A	B	B	A	B	A
Kukri_c33670_506	1D	44.7314	20056510	-	A	B	B	A	B	B	A	A	A	A	A	B	A	A	A	A	A	B	H	B	A	A	A	A	B	A	B	B	B	B	B	A	B	A	A	A	B	B	A	A	B	B	A	B	A
BS00000721_51	1D	56.1958	32544374	-	B	B	B	A	B	B	H	A	H	A	H	B	A	A	A	A	A	B	B	B	A	A	A	A	B	B	B	B	A	A	B	A	B	A	A	B	A	B	B	A	A	B	B	B	A
BS00087783_51	1D	56.1958	33473052	H	B	B	B	A	B	B	H	A	H	A	H	B	A	A	A	A	A	B	B	B	A	A	A	A	B	B	B	B	A	A	B	A	B	A	A	B	A	B	B	A	A	B	B	B	A
IACX11290	1D	56.1958	33472487	B	B	B	B	A	B	B	B	A	B	A	A	B	A	A	A	A	A	B	B	B	A	A	A	A	B	B	B	B	A	A	B	A	B	A	A	B	A	B	B	A	A	B	B	B	A
IACX589	1D	56.1958	32544853	H	B	B	B	A	B	B	-	A	H	A	H	B	A	A	A	A	A	B	B	B	A	A	A	A	B	B	B	B	A	A	B	A	B	A	A	B	A	B	B	A	A	B	B	B	A
wsnp_BE586140D_Ta_2_2	1D	56.1958	32544853	H	B	B	B	A	B	B	A	A	H	A	H	B	A	A	A	A	A	B	B	B	A	A	A	A	B	B	B	B	A	A	B	A	B	A	A	B	A	B	B	A	A	B	B	B	A
wsnp_Ex_rep_c101500_86856089	1D	56.1958	31423200	H	B	B	B	A	B	B	H	A	H	A	H	B	A	A	A	A	A	B	B	B	A	A	A	A	B	B	B	B	A	A	B	A	B	A	A	B	A	B	B	A	A	B	B	B	A
wsnp_Ex_rep_c101500_86856679	1D	56.1958	31424364	H	B	B	B	A	B	B	H	A	H	A	H	B	A	A	A	A	A	B	B	B	A	A	A	A	B	B	B	B	A	A	B	A	B	A	A	B	A	B	B	A	A	B	B	B	A
BS00066847_51	1D	59.6898		A	B	B	B	A	B	B	A	A	A	A	A	B	A	A	A	A	A	B	B	B	A	A	A	A	B	A	B	B	A	A	B	A	B	A	A	B	A	B	B	A	A	B	B	B	A
tplb0044p22_2257	1D	59.6898		A	B	B	B	A	B	B	A	A	A	A	A	B	A	A	A	A	A	B	B	B	A	A	A	A	B	A	B	B	A	A	B	A	B	A	A	B	A	B	B	A	A	B	B	B	A
BS00051826_51	1D	60.8011		A	B	B	B	A	B	B	A	A	A	A	A	B	A	B	A	A	A	B	B	B	A	A	A	A	B	A	B	B	A	A	B	A	B	A	A	B	A	B	B	A	A	B	B	B	A
BobWhite_c555_1485	1D	63.1558		H	B	B	B	A	B	B	A	A	H	A	H	B	A	A	A	A	A	B	B	B	A	A	A	A	B	A	B	B	A	A	B	A	B	A	A	B	A	B	B	A	A	B	B	B	A
BS00011451_51	1D	63.1558	38788934	H	B	B	B	A	B	B	A	A	-	A	H	B	A	A	A	A	A	B	B	B	A	A	A	A	B	A	B	B	A	A	B	A	B	A	A	B	A	B	B	A	A	B	B	B	A
BS00065478_51	1D	63.1558		H	B	B	B	A	B	B	A	A	H	A	H	B	A	A	A	A	A	B	B	B	A	A	A	A	B	A	B	B	A	A	B	A	B	A	A	B	A	B	B	A	A	B	B	B	A
BS00086679_51	1D	63.1558	38781446	H	B	B	B	A	B	B	A	A	H	A	H	B	A	A	A	A	A	B	B	B	A	A	A	A	B	A	B	B	A	A	B	A	B	A	A	B	A	B	B	A	A	B	B	B	A
CAP7_c1609_203	1D	63.1558	38552368	H	B	B	B	A	B	B	A	A	H	A	H	B	A	A	A	A	A	B	B	B	A	A	A	A	B	A	B	B	A	A	B	A	B	A	A	B	A	B	B	A	A	B	B	B	A
D_contig74531_32	1D	63.1558	38657660	H	B	B	B	A	B	B	A	A	H	A	H	B	A	A	A	A	A	B	B	B	A	A	A	A	B	A	B	B	A	A	B	A	B	A	A	B	A	B	B	A	A	B	B	B	A
D_GBUVHFX01ANH44_230	1D	63.1558	39868806	H	B	B	B	A	B	B	A	A	H	A	H	B	A	A	A	A	A	B	B	B	A	A	A	A	B	A	B	B	A	A	B	A	B	A	A	B	A	B	B	A	A	B	B	B	A
Excalibur_c16662_300	1D	63.1558	39948500	B	B	B	B	A	B	B	A	A	B	A	-	B	A	A	A	A	A	B	B	B	A	A	A	A	B	A	B	B	A	A	B	A	B	A	A	B	A	B	B	A	A	B	B	B	A
Excalibur_c4058_1121	1D	63.1558		H	B	B	B	A	B	B	A	A	H	A	H	B	A	A	A	A	A	B	B	B	A	A	A	A	B	A	B	B	A	A	B	A	B	A	A	B	A	B	B	A	A	B	B	B	A
tplb0044p22_2330	1D	63.1558		H	B	B	B	A	B	B	A	A	H	A	H	B	A	A	A	A	A	B	B	B	A	A	A	A	B	A	B	B	A	A	B	A	B	A	A	B	A	B	B	A	A	B	B	B	A
wsnp_CAP11_c1043_618449	1D	63.1558	38552754	H	B	B	B	A	B	B	A	A	H	A	H	B	A	A	A	A	A	B	B	B	A	A	A	A	B	A	B	B	A	A	B	A	B	A	A	B	A	B	B	A	A	B	B	B	A
BobWhite_c5419_643	1D	63.7305	310392532	H	B	B	B	A	B	B	A	A	H	A	H	B	A	A	A	A	A	B	B	B	A	A	A	A	B	A	B	B	A	A	B	A	B	A	A	B	A	B	B	A	A	B	B	B	A
BobWhite_c5419_861	1D	63.7305		H	B	B	B	A	B	B	A	A	H	A	-	B	A	A	A	A	A	B	B	B	A	A	A	A	B	A	B	B	A	A	B	A	B	A	A	B	A	B	B	A	A	B	B	B	A
BobWhite_c816_289	1D	63.7305	42549757	H	B	B	B	A	B	B	A	A	H	A	H	B	A	A	A	A	A	B	B	B	A	A	A	A	B	A	B	B	A	A	B	A	B	A	A	B	A	B	B	A	A	B	B	B	A
BS00024262_51	1D	63.7305		H	B	B	B	A	B	B	A	A	H	A	H	B	A	A	A	A	A	B	B	B	A	A	A	A	B	A	B	B	A	A	B	A	B	A	A	B	A	B	B	A	A	B	B	B	A
BS00067620_51	1D	63.7305		H	B	B	B	A	B	B	A	A	H	A	H	B	A	A	A	A	A	B	B	B	A	A	A	A	B	A	B	B	A	A	B	A	B	A	A	B	A	B	B	A	A	B	B	B	A
Excalibur_c4030_1770	1D	63.7305	49935492	H	B	B	B	A	B	B	A	A	H	A	H	B	A	A	A	A	A	B	B	B	A	A	A	A	B	A	B	B	A	A	B	A	B	A	A	B	A	B	B	A	A	B	B	B	A
Excalibur_c46695_219	1D	63.7305	43281537	H	B	B	B	A	B	B	A	A	H	A	H	B	A	A	A	A	A	B	B	B	A	A	A	A	B	A	B	B	A	A	B	A	B	A	A	B	A	B	B	A	A	B	B	B	A
IAAV4760	1D	63.7305	41869071	H	B	B	B	A	B	B	A	A	H	A	H	B	A	A	A	A	A	B	B	B	A	A	A	A	B	A	B	B	A	A	B	A	B	A	A	B	A	B	B	A	A	B	B	B	A
IAAV5348	1D	63.7305	43276998	H	B	B	B	A	B	B	A	A	H	A	H	B	A	A	A	A	A	B	B	B	A	A	A	A	B	A	B	B	A	A	B	A	B	A	A	B	A	B	B	A	A	B	B	B	A
IAAV614	1D	63.7305		H	B	B	B	A	B	B	A	A	H	A	H	B	A	A	A	A	A	B	B	B	A	A	A	A	B	A	B	B	A	A	B	A	B	A	A	B	A	B	B	A	A	B	B	B	A
IACX11153	1D	63.7305	41823675	H	B	B	B	A	B	B	A	A	H	A	H	B	A	A	A	A	A	B	B	B	A	A	A	A	B	A	B	B	A	A	B	A	B	A	A	B	A	B	B	A	A	B	B	B	A
Kukri_c24648_262	1D	63.7305	47805489	H	B	B	B	A	B	B	A	A	H	A	H	B	A	A	A	A	A	B	B	B	A	A	A	A	B	A	B	B	A	A	B	A	B	A	A	B	A	B	B	A	A	B	B	B	A
Kukri_c49577_630	1D	63.7305	49586207	H	B	B	B	A	B	B	-	A	H	A	H	B	A	A	A	A	A	B	B	B	A	A	A	A	B	A	B	B	A	A	B	A	B	A	A	B	A	B	B	A	A	B	B	B	A
Kukri_c5113_1082	1D	63.7305	47878785	H	B	B	B	A	B	B	-	A	-	A	H	B	A	A	A	A	A	B	B	B	A	A	A	A	B	A	B	B	A	A	B	A	B	A	A	B	A	B	B	A	A	B	B	B	A
Kukri_c53398_200	1D	63.7305	47713864	H	B	B	B	A	B	B	A	A	H	A	H	B	A	A	A	A	A	B	B	B	A	A	A	A	B	A	B	B	A	A	B	A	B	A	A	B	A	B	B	A	A	B	B	B	A
Kukri_c6167_1271	1D	63.7305	49604348	H	B	B	B	A	B	B	A	A	H	A	H	B	A	A	A	A	A	B	B	B	A	A	A	A	B	A	B	B	A	A	B	A	B	A	A	B	A	B	B	A	A	B	B	B	A
RAC875_c3762_710	1D	63.7305		H	B	B	B	A	B	B	A	A	H	A	H	B	A	A	A	A	A	B	B	B	A	A	A	A	B	A	B	B	A	A	B	A	B	A	A	B	A	B	B	A	A	B	B	B	A
RAC875_c48997_1160	1D	63.7305		H	B	B	B	A	B	B	A	A	H	A	H	B	A	A	A	A	A	B	B	B	A	A	A	A	B	A	B	B	A	A	B	A	B	A	A	B	A	B	B	A	A	B	B	B	A
RAC875_c8932_740	1D	63.7305		H	B	B	B	A	B	B	A	A	H	A	H	B	A	A	A	A	A	B	B	B	A	A	A	A	B	A	B	B	A	A	B	A	B	A	A	B	A	B	B	A	A	B	B	B	A
RAC875_rep_c69508_215	1D	63.7305		H	B	B	B	A	B	B	A	A	H	A	H	B	A	A	A	A	A	B	B	B	A	A	A	A	B	A	B	B	A	A	B	A	B	A	A	B	A	B	B	A	A	B	B	B	A
RAC875_rep_c81479_191	1D	63.7305	47879551	H	B	B	B	A	B	B	A	A	H	A	H	B	A	A	A	A	A	B	B	B	A	A	A	A	B	A	B	B	A	A	B	A	B	A	A	B	A	B	B	A	A	B	B	B	A
wsnp_CAP8_c458_368125	1D	63.7305	49422605	H	B	B	B	A	B	B	A	A	H	A	H	B	A	A	A	A	A	B	B	B	A	A	A	A	B	A	B	B	A	A	B	A	B	A	A	B	A	B	B	A	A	B	B	B	A
wsnp_CAP8_c458_368155	1D	63.7305	49422575	H	B	B	B	A	B	B	A	A	H	A	H	B	A	A	A	A	A	B	B	B	A	A	A	A	B	A	B	B	A	A	B	A	B	A	A	B	A	B	B	A	A	B	B	B	A
BobWhite_c28133_87	1D	64.3053		H	B	B	B	A	B	B	A	A	H	A	H	B	A	B	A	A	A	B	B	B	A	A	A	A	B	A	B	B	A	A	B	A	B	A	A	B	A	B	B	A	A	B	B	B	A
BS00031658_51	1D	64.3053	55670996	H	B	B	B	A	B	B	A	A	H	A	H	B	A	B	A	A	A	B	B	B	A	A	A	A	B	A	B	B	A	A	B	A	B	A	A	B	A	B	B	A	A	B	B	B	A
BS00065722_51	1D	64.3053	50970019	-	B	B	B	A	B	B	A	A	H	A	H	B	A	B	A	A	A	B	B	B	A	A	A	A	B	A	B	B	A	A	B	A	B	A	A	B	A	B	B	A	A	B	B	B	A
BS00072193_51	1D	64.3053		H	B	B	B	A	B	B	H	A	H	A	H	B	A	B	A	A	A	B	B	B	A	A	A	A	B	A	B	B	A	A	B	A	B	A	A	B	A	B	B	A	A	B	B	B	A
BS00074817_51	1D	64.3053	52339516	H	B	B	B	A	B	B	A	A	H	A	H	B	A	B	A	A	A	B	B	B	A	A	A	A	B	A	B	B	A	A	B	A	B	A	A	B	A	B	B	A	A	B	B	B	A
CAP12_c2978_93	1D	64.3053		H	B	B	B	A	B	B	A	A	H	A	H	B	A	B	A	A	A	B	B	B	A	A	A	A	B	A	B	B	A	A	B	A	B	A	A	B	A	B	B	A	A	B	B	B	A
D_contig16934_681	1D	64.3053	52342624	H	B	B	B	A	B	B	A	A	H	A	H	B	A	B	A	A	A	B	B	B	A	A	A	A	B	A	B	B	A	A	B	A	B	A	A	B	A	B	B	A	A	B	B	B	A
Excalibur_c5958_1270	1D	64.3053		H	B	B	B	A	B	B	A	A	-	A	H	B	A	B	A	A	A	B	B	B	A	A	A	A	B	A	B	B	A	A	B	A	B	A	A	B	A	B	B	A	A	B	B	B	A
Excalibur_c5958_1398	1D	64.3053		H	B	B	B	A	B	B	A	A	H	A	H	B	A	B	A	A	A	B	B	B	A	A	A	A	B	A	B	B	A	A	B	A	B	A	A	B	A	B	B	A	A	B	B	B	A
Kukri_c20844_116	1D	64.3053		H	B	B	B	A	B	B	H	A	H	A	H	B	A	B	A	A	A	B	B	B	A	A	A	A	B	A	B	B	A	A	B	A	B	A	A	B	A	B	B	A	A	B	B	B	A
Kukri_c44738_477	1D	64.3053	50194647	H	B	B	B	A	B	B	A	A	H	A	H	B	A	B	A	A	A	B	B	B	A	A	A	A	B	A	B	B	A	A	B	A	B	A	A	B	A	B	B	A	A	B	B	B	A
RAC875_c17951_108	1D	64.3053		H	B	B	B	A	B	B	A	A	H	A	H	B	A	B	A	A	A	B	B	B	A	A	A	A	B	A	B	B	A	A	B	A	B	A	A	B	A	B	B	A	A	B	B	B	A
RAC875_c35094_476	1D	64.3053	50296821	H	B	B	B	A	B	B	A	A	H	A	H	B	A	B	A	A	A	B	B	B	A	A	A	A	B	A	B	B	A	A	B	A	B	A	A	B	A	B	B	A	A	B	B	B	A
RAC875_c82888_83	1D	64.3053	87971145	H	B	B	B	A	B	B	A	A	H	A	H	B	A	B	A	A	A	B	B	B	A	A	A	A	B	A	B	B	A	A	B	A	B	A	A	B	A	B	B	A	A	B	B	B	A
BobWhite_rep_c65565_359	1D	65.496		-	B	B	B	A	B	B	A	A	H	A	H	B	A	B	A	A	A	B	B	B	A	A	A	A	B	A	B	B	A	A	B	A	B	A	A	B	B	B	B	A	A	B	B	B	A
RAC875_rep_c105196_532	1D	71.291	325964464	B	B	B	B	B	B	A	A	A	H	A	H	B	A	B	A	B	A	B	B	B	A	A	A	A	B	B	B	B	A	A	B	A	A	A	A	B	B	B	B	A	A	B	B	B	B
BS00066446_51	1D	72.454		B	B	B	B	B	B	A	A	A	B	A	B	B	A	B	A	B	A	B	B	B	A	A	A	A	B	B	B	B	A	A	B	A	A	A	A	B	B	B	B	A	A	B	A	B	B
BobWhite_c10977_834	1D	81.4541		B	B	B	B	B	B	A	A	A	H	A	H	B	A	A	A	B	A	B	A	B	A	A	A	A	B	B	A	B	A	A	A	H	A	A	A	B	B	A	B	B	A	B	A	B	A
BobWhite_c6998_365	1D	81.4541		B	B	B	B	B	B	A	A	A	-	A	-	B	A	A	A	B	A	B	A	B	A	A	A	A	B	B	A	B	A	A	A	-	A	A	A	B	B	-	B	B	A	B	A	B	A
BS00021702_51	1D	81.4541	414565902	B	B	B	B	B	B	A	A	A	H	A	H	B	A	A	A	B	A	B	A	B	A	A	A	A	B	B	A	B	A	A	A	H	A	A	A	B	B	H	B	B	A	B	A	B	A
BS00022768_51	1D	81.4541	412224068	B	B	B	B	B	B	A	A	A	H	A	H	B	A	A	A	B	A	B	A	B	A	A	A	A	B	B	A	B	A	A	A	H	A	A	A	B	B	A	B	B	A	B	A	B	A
BS00058554_51	1D	81.4541	410792212	B	B	B	B	B	B	A	A	A	H	A	H	B	A	A	A	B	A	B	A	B	A	A	A	A	B	B	A	B	A	A	A	H	A	A	A	B	B	A	B	B	A	B	A	B	A
BS00075001_51	1D	81.4541	414303471	B	B	B	B	B	B	A	A	A	H	A	H	B	A	A	A	B	A	B	A	B	A	A	A	A	B	B	A	B	A	A	A	H	A	A	A	B	B	A	B	B	A	B	A	B	A
BS00079095_51	1D	81.4541		B	B	B	B	B	B	A	A	A	H	A	H	B	A	A	A	B	A	B	A	B	A	A	A	A	B	B	A	B	A	A	A	H	A	A	A	B	B	A	B	B	A	B	A	B	A
BS00082503_51	1D	81.4541	412219244	B	B	B	B	B	B	A	A	A	H	A	H	B	A	A	A	B	A	B	A	B	A	A	A	A	B	B	A	B	A	A	A	H	A	A	A	B	B	A	B	B	A	B	A	B	A
CAP11_c3464_68	1D	81.4541	511502175	B	B	B	B	B	B	A	A	A	-	A	H	B	A	A	A	B	A	B	A	B	A	A	A	A	B	B	A	B	A	A	A	H	A	A	A	B	B	-	B	B	A	B	A	B	A
D_contig06122_208	1D	81.4541	408408350	B	B	B	B	B	B	A	A	A	H	A	H	B	A	A	A	B	A	B	A	B	A	A	A	A	B	B	A	B	A	A	A	H	A	A	A	B	B	A	B	B	A	B	A	B	A
D_GA8KES401EYUM8_190	1D	81.4541	412081300	B	B	B	B	B	B	A	A	A	H	A	H	B	A	A	A	B	A	B	A	B	A	A	A	A	B	B	A	B	A	A	A	H	A	A	A	B	B	A	B	B	A	B	A	B	A
D_GBF1XID01DNWRS_378	1D	81.4541		B	B	B	B	B	B	A	A	A	H	A	H	B	A	A	A	B	A	B	A	B	A	A	A	A	B	B	A	B	A	A	A	H	A	A	A	B	B	A	B	B	A	B	A	B	A
Excalibur_c19237_895	1D	81.4541		B	B	B	B	B	B	A	A	A	H	A	H	B	A	A	A	B	A	B	A	B	A	A	A	A	B	B	A	B	A	A	A	H	A	A	A	B	B	A	B	B	A	B	A	B	A
Excalibur_c23155_327	1D	81.4541		B	B	B	B	B	B	A	A	A	H	A	H	B	A	A	A	B	A	B	A	B	A	A	A	A	B	B	A	B	A	A	A	H	A	A	A	B	B	A	B	B	A	B	A	B	A
Excalibur_c48317_242	1D	81.4541		B	B	B	B	B	B	A	A	A	H	A	H	B	A	A	A	B	A	B	A	B	A	A	A	A	B	B	A	B	A	A	A	H	A	A	A	B	B	H	B	B	A	B	A	B	A
Excalibur_c50856_63	1D	81.4541	416458439	B	B	B	B	B	B	A	A	A	H	A	H	B	A	A	A	B	A	B	A	B	A	A	A	A	B	B	A	B	A	A	A	H	A	A	A	B	B	H	B	B	A	B	A	B	A
Excalibur_c8188_243	1D	81.4541	410468003	B	B	B	B	B	B	A	-	A	H	A	H	B	A	A	A	B	A	B	A	B	A	A	A	A	B	B	A	B	A	A	A	H	A	A	A	B	B	A	B	B	A	B	A	B	A
Excalibur_c8188_693	1D	81.4541	553020410	B	B	B	B	B	B	A	H	A	H	A	H	B	A	A	A	B	A	B	A	B	A	A	A	A	B	B	A	B	A	A	A	H	A	A	A	B	B	A	B	B	A	B	A	B	A
GENE-0315_356	1D	81.4541	561506328	B	B	B	B	B	B	A	A	A	H	A	H	B	A	A	A	B	A	B	A	B	A	A	A	A	B	B	A	B	A	A	A	H	A	A	A	B	B	H	B	B	A	B	A	B	A
GENE-0511_161	1D	81.4541		B	B	B	B	B	B	A	-	A	H	A	H	B	A	A	A	B	A	B	A	B	A	A	A	A	B	B	A	B	A	A	A	H	A	A	A	B	B	A	B	B	A	B	A	B	A
GENE-0511_484	1D	81.4541	414301748	B	B	B	B	B	B	A	A	A	H	A	H	B	A	A	A	B	A	B	A	B	A	A	A	A	B	B	A	B	A	A	A	H	A	A	A	B	B	A	B	B	A	B	A	B	A
IAAV2840	1D	81.4541	408535181	B	B	B	B	B	B	A	-	A	H	A	H	B	A	A	A	B	A	B	A	B	A	A	A	A	B	B	A	B	A	A	A	H	A	A	A	B	B	A	B	B	A	B	A	B	A
IAAV5841	1D	81.4541	415393476	B	B	B	B	B	B	A	A	A	H	A	H	B	A	A	A	B	A	B	A	B	A	A	A	A	B	B	A	B	A	A	A	H	A	A	A	B	B	H	B	B	A	B	A	B	A
IAAV7473	1D	81.4541	416128514	B	B	B	B	B	B	A	A	A	H	A	H	B	A	A	A	B	A	B	A	B	A	A	A	A	B	B	A	B	A	A	A	H	A	A	A	B	B	H	B	B	A	B	A	B	A
IAAV7745	1D	81.4541		B	B	B	B	B	B	A	A	A	H	A	H	B	A	A	A	B	A	B	A	B	A	A	A	A	B	B	A	B	A	A	A	H	A	A	A	B	B	A	B	B	A	B	A	B	A
IAAV868	1D	81.4541	409500632	B	B	B	B	B	B	A	A	A	A	A	A	B	A	A	A	B	A	B	A	B	A	A	A	A	B	B	A	B	A	A	A	A	A	A	A	B	B	A	B	B	A	B	A	B	A
Kukri_c29121_654	1D	81.4541	410466892	B	B	B	B	B	B	A	A	A	H	A	H	B	A	A	A	B	A	B	A	B	A	A	A	A	B	B	A	B	A	A	A	H	A	A	A	B	B	A	B	B	A	B	A	B	A
Kukri_c6051_640	1D	81.4541	412158918	B	B	B	B	B	B	A	A	A	H	A	H	B	A	A	A	B	A	B	A	B	A	A	A	A	B	B	A	B	A	A	A	H	A	A	A	B	B	A	B	B	A	B	A	B	A
Ra_c21676_178	1D	81.4541	410464891	B	B	B	B	B	B	A	A	A	H	A	H	B	A	A	A	B	A	B	A	B	A	A	A	A	B	B	A	B	A	A	A	H	A	A	A	B	B	A	B	B	A	B	A	B	A
RAC875_c35846_671	1D	81.4541		B	B	B	B	B	B	A	A	A	-	A	-	B	A	A	A	B	A	B	A	B	A	A	A	A	B	B	A	B	A	A	A	-	A	A	A	B	B	-	B	B	A	B	A	B	A
RAC875_c3604_1527	1D	81.4541		B	B	B	B	B	B	A	A	A	H	A	H	B	A	A	A	B	A	B	A	B	A	A	A	A	B	B	A	B	A	A	A	H	A	A	A	B	B	A	B	B	A	B	A	B	A
RAC875_c4135_1028	1D	81.4541	409791232	B	B	B	B	B	B	A	A	A	H	A	H	B	A	A	A	B	A	B	A	B	A	A	A	A	B	B	A	B	A	A	A	H	A	A	A	B	B	A	B	B	A	B	A	B	A
RAC875_c43831_91	1D	81.4541		B	B	B	B	B	B	A	A	A	H	A	H	B	A	A	A	B	A	B	A	B	A	A	A	A	B	B	A	B	A	A	A	H	A	A	A	B	B	A	B	B	A	B	A	B	A
RAC875_c49612_102	1D	81.4541	412023762	B	B	B	B	B	B	A	A	A	H	A	H	B	A	A	A	B	A	B	A	B	A	A	A	A	B	B	A	B	A	A	A	H	A	A	A	B	B	A	B	B	A	B	A	B	A
RAC875_c54260_127	1D	81.4541		B	B	B	B	B	B	A	A	A	H	A	H	B	A	A	A	B	A	B	A	B	A	A	A	A	B	B	A	B	A	A	A	H	A	A	A	B	B	A	B	B	A	B	A	B	A
RFL_Contig3622_1217	1D	81.4541	407875598	B	B	B	B	B	B	A	A	A	H	A	H	B	A	A	A	B	A	B	A	B	A	A	A	A	B	B	A	B	A	A	A	H	A	A	A	B	B	A	B	B	A	B	A	B	A
TA004358-0724	1D	81.4541		B	B	B	B	B	B	A	A	A	H	A	H	B	A	A	A	B	A	B	A	B	A	A	A	A	B	B	A	B	A	A	A	H	A	A	A	B	B	A	B	B	A	B	A	B	A
TA004476-0719	1D	81.4541	411560421	B	B	B	B	B	B	A	-	A	-	A	-	B	A	A	A	B	A	B	A	B	A	A	A	A	B	B	A	B	A	A	A	-	A	A	A	B	B	A	B	B	A	B	A	B	A
TA012861-0741	1D	81.4541		B	B	B	B	B	B	A	H	A	H	A	H	B	A	A	A	B	A	B	A	B	A	A	A	A	B	B	A	B	A	A	A	H	A	A	A	B	B	H	B	B	A	B	A	B	A
wsnp_Ex_c12447_19847242	1D	81.4541	416456286	B	B	B	B	B	B	A	A	A	-	A	-	B	A	A	A	B	A	B	A	B	A	A	A	A	B	B	A	B	A	A	A	-	A	A	A	B	B	-	B	B	A	B	A	B	A
wsnp_Ex_c1318_2519998	1D	81.4541		B	B	B	B	B	B	A	A	A	H	A	H	B	A	A	A	B	A	B	A	B	A	A	A	A	B	B	A	B	A	A	A	H	A	A	A	B	B	A	B	B	A	B	A	B	A
wsnp_Ex_c15396_23659859	1D	81.4541	412023762	B	B	B	B	B	B	A	A	A	H	A	H	B	A	A	A	B	A	B	A	B	A	A	A	A	B	B	A	B	A	A	A	H	A	A	A	B	B	A	B	B	A	B	A	B	A
wsnp_Ex_c18665_27541568	1D	81.4541	416099472	B	B	B	B	B	B	A	A	A	H	A	H	B	A	A	A	B	A	B	A	B	A	A	A	A	B	B	A	B	A	A	A	H	A	A	A	B	B	H	B	B	A	B	A	B	A
wsnp_Ex_c25974_35235456	1D	81.4541		B	B	B	B	B	B	A	A	A	H	A	H	B	A	A	A	B	A	B	A	B	A	A	A	A	B	B	A	B	A	A	A	H	A	A	A	B	B	A	B	B	A	B	A	B	A
wsnp_Ex_c27290_36498462	1D	81.4541		B	B	B	B	B	B	A	A	A	H	A	H	B	A	A	A	B	A	B	A	B	A	A	A	A	B	B	A	B	A	A	A	H	A	A	A	B	B	A	B	B	A	B	A	B	A
wsnp_Ex_c27290_36498531	1D	81.4541		B	B	B	B	B	B	A	A	A	H	A	H	B	A	A	A	B	A	B	A	B	A	A	A	A	B	B	A	B	A	A	A	H	A	A	A	B	B	A	B	B	A	B	A	B	A
wsnp_Ex_c3831_6966926	1D	81.4541	409496882	B	B	B	B	B	B	A	A	A	H	A	H	B	A	A	A	B	A	B	A	B	A	A	A	A	B	B	A	B	A	A	A	H	A	A	A	B	B	A	B	B	A	B	A	B	A
wsnp_Ex_c8188_13842273	1D	81.4541	410464692	B	B	B	B	B	B	A	A	A	H	A	H	B	A	A	A	B	A	B	A	B	A	A	A	A	B	B	A	B	A	A	A	H	A	A	A	B	B	A	B	B	A	B	A	B	A
wsnp_Ex_rep_c66423_64641115	1D	81.4541	415415894	B	B	B	B	B	B	A	A	A	H	A	H	B	A	A	A	B	A	B	A	B	A	A	A	A	B	B	A	B	A	A	A	H	A	A	A	B	B	H	B	B	A	B	A	B	A
wsnp_Ex_rep_c69024_67924125	1D	81.4541		B	B	B	B	B	B	A	A	A	H	A	H	B	A	A	A	B	A	B	A	B	A	A	A	A	B	B	A	B	A	A	A	H	A	A	A	B	B	A	B	B	A	B	A	B	A
wsnp_JD_c8173_9207415	1D	81.4541		B	B	B	B	B	B	A	A	A	H	A	H	B	A	A	A	B	A	B	A	B	A	A	A	A	B	B	A	B	A	A	A	H	A	A	A	B	B	A	B	B	A	B	A	B	A
wsnp_Ku_c2624_4986980	1D	81.4541		B	B	B	B	B	B	A	A	A	H	A	H	B	A	A	A	B	A	B	A	B	A	A	A	A	B	B	A	B	A	A	A	H	A	A	A	B	B	A	B	B	A	B	A	B	A
wsnp_Ku_c5560_9851459	1D	81.4541	408404758	B	B	B	B	B	B	A	A	A	H	A	H	B	A	A	A	B	A	B	A	B	A	A	A	A	B	B	A	B	A	A	A	H	A	A	A	B	B	A	B	B	A	B	A	B	A
wsnp_Ku_c5560_9853214	1D	81.4541	408407933	B	B	B	B	B	B	A	A	A	H	A	H	B	A	A	A	B	A	B	A	B	A	A	A	A	B	B	A	B	A	A	A	H	A	A	A	B	B	A	B	B	A	B	A	B	A
wsnp_Ku_c7266_12551048	1D	81.4541		B	B	B	B	B	B	A	A	A	A	A	A	B	A	A	A	B	A	B	A	B	A	A	A	A	B	B	A	B	A	A	A	H	A	A	A	B	B	A	B	B	A	B	A	B	A
BS00066188_51	1D	82.0355		B	B	B	B	B	B	A	H	A	B	A	B	B	A	A	A	B	A	B	A	B	A	A	A	A	B	B	A	B	A	A	A	-	A	A	A	B	B	-	B	B	A	B	A	B	A
RAC875_c87321_108	1D	82.0355	416101167	B	B	B	B	B	B	A	A	A	B	A	B	B	A	A	A	B	A	B	A	B	A	A	A	A	B	B	A	B	A	A	A	B	A	A	A	B	B	B	B	B	A	B	A	B	A
IAAV3490	1D	87.2492	433213085	H	B	A	B	B	H	A	H	A	B	A	H	B	A	A	A	B	A	B	A	B	A	A	A	A	B	B	A	B	A	A	B	A	A	A	A	B	B	H	B	B	A	B	A	B	A
IAAV724	1D	87.2492	433254100	H	B	A	B	B	H	A	A	A	B	A	H	B	A	A	A	B	A	B	A	B	A	A	A	A	B	B	A	B	A	A	B	A	A	A	A	B	B	H	B	B	A	B	A	B	A
IACX574	1D	87.2492	433252900	-	B	A	B	B	H	A	-	A	B	A	H	B	A	A	A	B	A	B	A	B	A	A	A	A	B	B	A	B	A	A	B	A	A	A	A	B	B	H	B	B	A	B	A	B	A
Ra_c21472_1369	1D	87.2492	433213085	H	B	A	B	B	H	A	H	A	B	A	H	B	A	A	A	B	A	B	A	B	A	A	A	A	B	B	A	B	A	A	B	A	A	A	A	B	B	H	B	B	A	B	A	B	A
RAC875_c10083_154	1D	87.2492	432794518	H	B	A	B	B	H	A	A	A	B	A	H	B	A	A	A	B	A	B	A	B	A	A	A	A	B	B	A	B	A	A	B	A	A	A	A	B	B	H	B	B	A	B	A	B	A
RFL_Contig4705_3207	1D	87.2492	433213628	H	B	A	B	B	H	A	-	A	B	A	H	B	A	A	A	B	A	B	A	B	A	A	A	A	B	B	A	B	A	A	B	A	A	A	A	B	B	H	B	B	A	B	A	B	A
wsnp_Ex_rep_c111610_93458148	1D	87.2492	433212657	H	B	A	B	B	H	A	A	A	B	A	H	B	A	A	A	B	A	B	A	B	A	A	A	A	B	B	A	B	A	A	B	A	A	A	A	B	B	H	B	B	A	B	A	B	A
wsnp_Ku_c40309_48558476	1D	87.2492	433212969	H	B	A	B	B	H	A	H	A	B	A	H	B	A	A	A	B	A	B	A	B	A	A	A	A	B	B	A	B	A	A	B	A	A	A	A	B	B	H	B	B	A	B	A	B	A
D_GDS7LZN02GSCOW_131	1D	87.8374		H	B	A	A	B	H	A	H	A	B	A	H	B	A	A	A	B	A	B	A	B	A	A	A	A	B	B	A	B	A	A	B	A	A	A	A	B	B	H	B	B	A	B	A	B	A
Excalibur_c8231_398	1D	87.8374	433274570	H	B	A	A	B	H	A	A	A	B	A	H	B	A	A	A	B	A	B	A	B	A	A	A	A	B	B	A	B	A	A	B	A	A	A	A	B	B	H	B	B	A	B	A	B	A
Excalibur_c8301_1555	1D	87.8374	433276844	H	B	A	A	B	H	A	A	A	B	A	H	B	A	A	A	B	A	B	A	B	A	A	A	A	B	B	A	B	A	A	B	A	A	A	A	B	B	H	B	B	A	B	A	B	A
wsnp_Ex_c35886_43950102	1D	88.4188	436191905	A	B	A	A	B	H	A	A	A	B	A	H	B	A	A	A	B	A	B	A	B	A	A	A	A	B	B	A	B	A	A	B	A	A	A	A	B	B	H	B	B	A	B	A	B	A
BS00093390_51	1D	88.4189	436189752	A	B	A	A	B	H	A	A	A	B	A	H	B	A	A	A	B	A	B	A	B	A	A	A	A	B	B	A	B	A	A	B	A	A	A	A	B	B	H	B	B	A	B	A	B	A
TA002095-0637	2A	0	5526356	B	B	A	A	A	A	B	A	A	A	A	A	A	H	A	B	A	B	B	B	A	B	B	A	A	A	B	A	B	A	A	B	A	A	B	B	B	A	A	B	B	A	A	A	A	A
Kukri_c33374_1048	2A	0.5883	4790384	B	B	A	A	A	A	B	A	A	A	A	A	A	A	A	B	A	B	B	B	A	B	B	A	A	A	B	A	B	A	A	B	A	A	B	B	B	A	A	B	B	A	A	A	A	A
wsnp_Ku_c33374_42877546	2A	0.5883	4790098	B	B	A	A	A	A	B	A	A	A	A	A	A	A	A	B	A	B	B	B	A	B	B	A	A	A	B	A	B	A	A	B	A	A	B	B	B	A	A	B	B	A	A	A	A	A
BS00068050_51	2A	1.1907	8478664	B	B	A	A	A	A	B	A	A	A	A	A	A	A	A	B	A	B	B	B	A	B	B	A	A	A	B	A	B	A	A	B	A	A	B	B	H	A	A	B	-	A	A	A	A	A
wsnp_Ex_c11950_19164191	2A	2.4104	4216166	B	B	A	A	A	A	B	A	A	A	A	A	A	A	A	B	B	B	B	B	A	B	B	A	A	A	B	A	B	A	A	B	A	A	B	B	B	A	A	B	B	A	A	A	A	A
wsnp_Ku_c23598_33524490	2A	2.4104	3447494	B	-	A	A	A	A	B	A	A	A	A	A	A	A	A	B	B	B	B	B	A	B	B	A	A	A	B	A	-	A	A	B	A	A	B	B	B	A	A	B	B	A	A	A	A	A
BobWhite_c13373_250	2A	2.4105	3962431	B	B	A	A	A	A	B	A	A	A	A	A	A	A	A	B	B	B	B	B	A	B	B	A	A	A	B	A	B	A	A	B	A	A	B	B	B	A	A	B	B	A	A	A	A	A
RAC875_rep_c88665_52	2A	29.8758		A	-	A	B	A	A	B	A	B	A	A	A	A	A	A	B	B	B	B	B	B	B	B	A	A	B	A	B	A	A	A	B	B	B	B	B	B	A	B	A	A	A	A	A	B	A
BS00003867_51	2A	30.4252	18232241	A	H	A	B	A	A	B	B	B	A	A	A	A	A	A	B	B	B	B	B	B	B	B	A	A	B	A	B	A	A	A	B	B	B	B	B	B	A	B	A	A	A	A	A	B	A
Excalibur_c12177_285	2A	30.4252		A	-	A	B	A	A	B	B	B	A	A	A	A	A	A	B	B	B	B	B	B	B	B	A	A	B	A	B	A	A	A	B	B	B	B	B	B	A	B	A	A	A	A	A	B	A
Kukri_c3882_2021	2A	30.4252	17815713	A	H	A	B	A	A	B	B	B	A	A	A	A	A	A	B	B	B	B	B	B	B	B	A	A	B	A	B	A	A	A	B	B	B	B	B	B	A	B	A	A	A	A	A	B	A
RAC875_rep_c88665_100	2A	30.4252	19028926	A	-	A	B	A	A	B	-	B	A	A	A	A	A	A	B	B	B	B	B	B	B	B	A	A	B	A	-	A	A	A	B	B	-	-	-	B	A	-	A	A	A	A	A	B	A
wsnp_BF201235A_Ta_2_4	2A	30.4252		A	H	A	B	A	A	B	B	B	A	A	A	A	A	A	B	B	B	B	B	B	B	B	A	A	B	A	B	A	A	A	B	B	B	B	B	B	A	B	A	A	A	A	A	B	A
wsnp_RFL_Contig3790_4082085	2A	30.4252	330053684	A	-	A	B	A	A	B	B	B	A	A	A	A	A	A	B	B	B	B	B	B	B	B	A	A	B	A	B	A	A	A	B	B	B	B	B	B	A	B	A	A	A	A	A	B	A
RAC875_rep_c111906_144	2A	36.9556	27967266	A	B	A	B	A	A	B	B	A	B	A	B	A	A	A	B	B	B	B	B	B	B	B	A	A	B	A	B	A	H	H	B	B	H	B	B	B	A	B	A	A	A	A	A	B	A
Tdurum_contig42153_5854	2A	36.9556		A	B	A	B	A	A	B	B	A	B	A	B	A	A	A	B	B	B	B	B	B	B	B	A	A	B	A	B	A	-	-	B	B	-	B	B	B	A	B	A	A	A	A	A	B	A
Tdurum_contig42153_7329	2A	36.9556		A	B	A	B	A	A	B	B	A	B	A	B	A	A	A	B	B	B	B	B	B	B	B	A	A	B	A	B	A	H	H	B	B	H	B	B	B	A	B	A	A	A	A	A	B	A
CAP11_c2293_200	2A	42.0363	30147904	A	H	A	B	A	A	B	B	A	B	A	B	A	A	A	B	B	B	B	B	B	B	B	A	B	A	A	B	A	H	H	B	B	H	B	B	B	A	B	A	A	A	A	A	B	A
BS00004724_51	2A	43.227	31693374	A	H	A	B	B	A	B	B	A	B	A	B	A	A	A	B	B	B	B	B	B	B	B	A	B	A	A	A	A	H	H	B	B	H	B	B	B	A	B	A	A	A	A	A	B	A
BS00022487_51	2A	43.227	47169671	A	H	A	B	B	A	B	B	A	B	A	B	A	A	A	B	B	B	B	B	B	B	B	A	B	A	A	A	A	H	H	B	B	H	B	B	B	A	B	A	A	A	A	A	B	A
Kukri_c84087_154	2A	43.227	28771115	A	-	A	B	B	A	B	B	A	B	A	B	A	A	A	B	B	B	B	B	B	B	B	A	B	A	A	A	A	H	H	B	B	H	B	B	B	A	B	A	A	A	A	A	B	A
BS00022982_51	2A	43.8294	32139721	A	H	A	B	B	A	B	B	A	B	A	B	A	A	A	B	A	B	B	B	B	B	B	A	B	A	A	A	A	H	H	B	B	H	B	B	B	A	B	A	A	A	A	A	B	A
BS00073381_51	2A	43.8294	32153232	A	H	A	B	B	A	B	B	A	B	A	B	A	A	A	B	A	B	B	B	B	B	B	A	B	A	A	A	A	H	H	B	B	H	B	B	B	A	B	A	A	A	A	A	B	A
Excalibur_c92241_336	2A	43.8294	32139650	A	H	A	B	B	A	B	H	A	B	A	B	A	A	A	B	A	B	B	B	B	B	B	A	B	A	A	A	A	H	H	B	B	H	B	B	B	A	B	A	A	A	A	A	B	A
GENE-0749_215	2A	43.8294	32269330	A	H	A	B	B	A	B	B	A	B	A	B	A	A	A	B	A	B	B	B	B	B	B	A	B	A	A	A	A	H	H	B	B	H	B	B	B	A	B	A	A	A	A	A	B	A
RAC875_rep_c78744_228	2A	43.8294	31957725	A	H	A	B	B	A	B	B	A	B	A	B	A	A	A	B	A	B	B	B	B	B	B	A	B	A	A	A	A	H	H	B	B	H	B	B	B	A	B	A	A	A	A	A	B	A
wsnp_Ex_c15740_24096817	2A	43.8294	32149063	A	H	A	B	B	A	B	H	A	B	A	B	A	A	A	B	A	B	B	B	B	B	B	A	B	A	A	A	A	H	H	B	B	H	B	B	B	A	B	A	A	A	A	A	B	A
Tdurum_contig11803_475	2A	47.0807	32792279	B	H	A	B	B	A	B	B	A	B	A	B	A	B	A	B	A	B	B	B	B	B	B	A	B	A	A	A	A	H	-	B	B	B	B	B	B	A	B	A	A	A	A	A	B	A
Tdurum_contig11803_850	2A	47.0807	54531395	B	H	A	B	B	A	B	B	A	B	A	B	A	B	A	B	A	B	B	B	B	B	B	A	B	A	A	A	A	H	H	B	B	B	B	B	B	A	B	A	A	A	A	A	B	A
Tdurum_contig11803_306	2A	47.0808	36041133	B	H	A	B	B	A	B	B	A	B	A	B	A	B	A	B	A	B	B	B	B	B	B	A	B	A	A	A	A	H	H	B	B	B	B	B	B	A	B	A	A	A	A	A	B	A
Ra_c58279_684	2A	48.9566	63292382	B	H	A	B	B	A	B	B	A	B	A	B	A	B	A	B	A	B	B	B	B	B	B	A	B	A	A	A	H	A	A	B	B	B	B	B	B	A	B	A	A	A	A	B	B	A
Ra_c58279_702	2A	48.9566	41232515	B	H	A	B	B	A	B	B	A	B	A	B	A	B	A	B	A	B	B	B	B	B	B	A	B	A	A	A	H	A	A	B	B	B	B	B	B	A	B	A	A	A	A	B	B	A
wsnp_Ex_c5412_9564346	2A	48.9566	36793720	B	H	A	B	B	A	B	B	A	B	A	B	A	B	A	B	A	B	B	B	B	B	B	A	B	A	A	A	H	A	A	B	B	B	B	B	B	A	B	A	A	A	A	B	B	A
wsnp_Ex_c5412_9564478	2A	48.9566	41236061	B	H	A	B	B	A	B	B	A	B	A	B	A	B	A	B	A	B	B	B	B	B	B	A	B	A	A	A	H	A	A	B	B	B	B	B	B	A	B	A	A	A	A	B	B	A
Tdurum_contig55610_784	2A	49.5449	42475904	B	H	A	B	B	A	B	B	A	B	A	B	A	B	A	B	A	B	B	B	B	B	B	A	B	A	A	A	H	A	A	B	B	B	B	B	B	A	B	A	A	A	A	B	B	A
IAAV7468	2A	51.4208	46108391	B	H	A	B	B	A	B	B	A	B	A	B	A	B	B	B	A	B	B	B	B	B	B	A	B	A	A	H	H	A	A	A	B	B	B	B	B	A	B	A	A	A	A	B	B	A
wsnp_Ku_c1292_2572053	2A	51.4208	45120272	B	H	A	B	B	A	B	B	A	B	A	B	A	B	B	B	A	B	B	B	B	B	B	A	B	A	A	H	H	A	A	A	B	B	B	B	B	A	B	A	A	A	A	B	B	A
Excalibur_c26918_75	2A	57.5321		B	H	A	B	B	B	B	B	A	B	A	B	A	B	B	B	A	B	B	B	A	A	B	A	B	A	A	H	A	A	A	A	A	B	B	B	B	A	B	A	A	A	B	B	B	A
TA004602-1630	2A	63.4031		B	H	A	B	B	B	B	H	A	B	A	B	A	B	B	B	A	A	B	B	A	A	B	A	A	A	A	A	A	A	A	B	A	H	B	A	B	B	B	A	A	A	B	H	A	A
Tdurum_contig47258_1039	2A	63.4031	59558216	B	H	A	B	B	B	B	B	A	B	A	B	A	B	B	B	A	A	B	B	A	A	B	A	A	A	A	A	A	A	A	B	A	H	B	A	B	B	B	A	A	A	B	H	A	A
wsnp_Ku_c15567_24223777	2A	63.4031	60753175	B	-	A	B	B	B	B	-	A	B	A	B	A	B	B	B	A	A	B	B	A	A	B	A	A	A	A	A	A	A	A	B	A	-	B	A	B	B	B	A	A	A	B	-	A	A
wsnp_Ku_c15567_24224486	2A	63.4031	61287768	B	H	A	B	B	B	B	B	A	B	A	B	A	B	B	B	A	A	B	B	A	A	B	A	A	A	A	A	A	A	A	B	A	H	B	A	B	B	B	A	A	A	B	H	A	A
BS00036766_51	2A	63.9984	74107855	B	H	A	B	B	B	B	B	A	B	A	B	A	B	B	B	A	A	B	B	A	A	B	A	A	A	A	A	A	H	H	B	A	A	B	A	B	B	B	A	A	A	B	A	A	A
Excalibur_c37649_125	2A	63.9984	114045525	B	H	A	B	B	B	B	B	A	B	A	B	A	B	B	B	A	A	B	B	A	A	B	A	A	A	A	A	A	-	H	B	A	A	B	A	B	B	B	A	A	A	B	A	A	A
RAC875_rep_c119471_174	2A	67.6635	101994229	B	H	A	B	B	B	B	B	A	B	A	B	A	B	B	A	A	A	B	B	A	B	A	A	A	A	A	A	A	H	H	A	A	A	B	A	B	B	B	A	A	A	B	B	A	A
Kukri_c45015_145	2A	68.8265	117180877	B	H	A	B	B	B	B	B	A	B	A	B	A	B	B	A	A	A	B	B	A	B	A	A	A	A	A	A	A	H	H	A	A	A	B	A	B	B	A	A	A	A	B	B	A	A
wsnp_Ex_c12219_19526749	2A	68.8265	117390903	B	H	A	B	B	B	B	B	A	B	A	B	A	B	B	A	A	A	B	B	A	B	A	A	A	A	A	A	A	H	H	A	A	A	B	A	B	B	A	A	A	A	B	B	A	A
BobWhite_c23953_312	2A	69.4079	155833366	B	H	A	B	B	B	B	B	A	B	A	B	A	B	B	A	A	A	B	B	A	B	A	A	A	A	A	A	A	A	A	A	A	A	B	A	B	H	A	A	A	A	B	B	A	A
wsnp_BG263521A_Ta_2_2	2A	69.4079	165849424	B	H	A	B	B	B	B	B	A	B	A	B	A	B	B	A	A	A	B	B	A	B	A	A	A	A	A	A	A	A	A	A	A	A	B	A	B	H	A	A	A	A	B	B	A	A
wsnp_Ex_c22862_32074455	2A	69.4079	165848340	B	H	A	B	B	B	B	B	A	B	A	B	A	B	B	A	A	A	B	B	A	B	A	A	A	A	A	A	A	A	A	A	A	A	B	A	B	-	A	A	A	A	B	B	A	A
BS00031140_51	2A	69.9826		B	H	A	B	B	B	B	-	A	B	A	B	A	B	B	A	A	A	B	B	A	B	A	A	A	A	B	A	A	A	A	A	A	A	B	A	B	H	A	A	A	A	B	B	A	A
BS00039489_51	2A	69.9826	203004127	B	H	A	B	B	B	B	B	A	B	A	B	A	B	B	A	A	A	B	B	A	B	A	A	A	A	B	A	A	A	A	A	A	A	B	A	B	H	A	A	A	A	B	B	A	A
BS00052043_51	2A	69.9826	376080025	B	H	A	B	B	B	B	B	A	B	A	B	A	B	B	A	A	A	B	B	A	B	A	A	A	A	B	A	A	A	A	A	A	A	B	A	B	H	A	A	A	A	B	B	A	A
BS00056232_51	2A	69.9826		B	H	A	B	B	B	B	B	A	B	A	B	A	B	B	A	A	A	B	B	A	B	A	A	A	A	B	A	A	A	A	A	A	A	B	A	B	H	A	A	A	A	B	B	A	A
BS00067886_51	2A	69.9826		B	H	A	B	B	B	B	B	A	B	A	B	A	B	B	A	A	A	B	B	A	B	A	A	A	A	B	A	A	A	A	A	A	A	B	A	B	H	A	A	A	A	B	B	A	A
BS00073720_51	2A	69.9826		B	H	A	B	B	B	B	B	A	B	A	B	A	B	B	A	A	A	B	B	A	B	A	A	A	A	B	A	A	A	A	A	A	A	B	A	B	H	A	A	A	A	B	B	A	A
BS00091670_51	2A	69.9826	200056856	B	H	A	B	B	B	B	B	A	B	A	B	A	B	B	A	A	A	B	B	A	B	A	A	A	A	B	A	A	A	A	A	A	A	B	A	B	H	A	A	A	A	B	B	A	A
BS00097263_51	2A	69.9826	210470326	B	H	A	B	B	B	B	B	A	B	A	B	A	B	B	A	A	A	B	B	A	B	A	A	A	A	B	A	A	A	A	A	A	A	B	A	B	H	A	A	A	A	B	B	A	A
CAP12_c1437_261	2A	69.9826	276276570	B	H	A	B	B	B	B	B	A	B	A	B	A	B	B	A	A	A	B	B	A	B	A	A	A	A	B	A	A	A	A	A	A	A	B	A	B	H	A	A	A	A	B	B	A	A
CAP7_rep_c6939_197	2A	69.9826	379151189	B	H	A	B	B	B	B	B	A	B	A	B	A	B	B	A	A	A	B	B	A	B	A	A	A	A	B	A	A	A	A	A	A	A	B	A	B	H	A	A	A	A	B	B	A	A
Excalibur_rep_c67434_73	2A	69.9826		B	-	A	B	B	B	B	B	A	B	A	B	A	B	B	A	A	A	B	B	A	B	A	A	A	A	B	A	A	A	A	A	A	A	B	A	B	H	A	A	A	A	B	B	A	A
GENE-1326_350	2A	69.9826	282933779	B	H	A	B	B	B	B	B	A	B	A	B	A	B	B	A	A	A	B	B	A	B	A	A	A	A	B	A	A	A	A	A	A	A	B	A	B	H	A	A	A	A	B	B	A	A
IAAV1587	2A	69.9826	206858198	B	H	A	B	B	B	B	B	A	B	A	B	A	B	B	A	A	A	B	B	A	B	A	A	A	A	B	A	A	A	A	A	A	A	B	A	B	H	A	A	A	A	B	B	A	A
IAAV1691	2A	69.9826	324292455	B	H	A	B	B	B	B	B	A	B	A	B	A	B	B	A	A	A	B	B	A	B	A	A	A	A	B	A	A	A	A	A	A	A	B	A	B	H	A	A	A	A	B	B	A	A
IAAV3570	2A	69.9826		B	H	A	B	B	B	B	B	A	B	A	B	A	B	B	A	A	A	B	B	A	B	A	A	A	A	B	A	A	A	A	A	A	A	B	A	B	H	A	A	A	A	B	B	A	A
JD_c3358_1128	2A	69.9826	376081771	B	H	A	B	B	B	B	B	A	B	A	B	A	B	B	A	A	A	B	B	A	B	A	A	A	A	B	A	A	A	A	A	A	A	B	A	B	H	A	A	A	A	B	B	A	A
Ku_c36017_329	2A	69.9826		B	H	A	B	B	B	B	B	A	B	A	B	A	B	B	A	A	A	B	B	A	B	A	A	A	A	B	A	A	A	A	A	A	A	B	A	B	H	A	A	A	A	B	B	A	A
Ku_c70277_1276	2A	69.9826	368960757	B	H	A	B	B	B	B	B	A	B	A	B	A	B	B	A	A	A	B	B	A	B	A	A	A	A	B	A	A	A	A	A	A	A	B	A	B	H	A	A	A	A	B	B	A	A
Kukri_c41543_366	2A	69.9826		B	-	A	B	B	B	B	B	A	B	A	B	A	B	B	A	A	A	B	B	A	B	A	A	A	A	B	A	A	A	A	A	A	A	B	A	B	-	A	A	A	A	B	B	A	A
Kukri_rep_c70265_167	2A	69.9826	341921066	B	H	A	B	B	B	B	-	A	B	A	B	A	B	B	A	A	A	B	B	A	B	A	A	A	A	B	A	A	A	A	A	A	A	B	A	B	H	A	A	A	A	B	B	A	A
RAC875_c102123_159	2A	69.9826		B	H	A	B	B	B	B	B	A	B	A	B	A	B	B	A	A	A	B	B	A	B	A	A	A	A	B	A	A	A	A	A	A	A	B	A	B	H	A	A	A	A	B	B	A	A
RAC875_c102123_187	2A	69.9826		B	H	A	B	B	B	B	B	A	B	A	B	A	B	B	A	A	A	B	B	A	B	A	A	A	A	B	A	A	A	A	A	A	A	B	A	B	H	A	A	A	A	B	B	A	A
RAC875_c38750_86	2A	69.9826	275951989	B	H	A	B	B	B	B	B	A	B	A	B	A	B	B	A	A	A	B	B	A	B	A	A	A	A	B	A	A	A	A	A	A	A	B	A	B	H	A	A	A	A	B	B	A	A
RAC875_c57998_165	2A	69.9826	188806741	B	A	A	B	B	B	B	B	A	B	A	B	A	B	B	A	A	A	B	B	A	B	A	A	A	A	B	A	A	A	A	A	A	A	B	A	B	-	A	A	A	A	B	B	A	A
RAC875_c76620_361	2A	69.9826	376752608	B	H	A	B	B	B	B	B	A	B	A	B	A	B	B	A	A	A	B	B	A	B	A	A	A	A	B	A	A	A	A	A	A	A	B	A	B	H	A	A	A	A	B	B	A	A
RAC875_rep_c101082_855	2A	69.9826	337669742	B	H	A	B	B	B	B	-	A	B	A	B	A	B	B	A	A	A	B	B	A	B	A	A	A	A	B	A	A	A	A	A	A	A	B	A	B	H	A	A	A	A	B	B	A	A
RAC875_rep_c101788_71	2A	69.9826	371045950	B	H	A	B	B	B	B	B	A	B	A	B	A	B	B	A	A	A	B	B	A	B	A	A	A	A	B	A	A	A	A	A	A	A	B	A	B	H	A	A	A	A	B	B	A	A
Tdurum_contig10910_1662	2A	69.9826	368956484	B	H	A	B	B	B	B	B	A	B	A	B	A	B	B	A	A	A	B	B	A	B	A	A	A	A	B	A	A	A	A	A	A	A	B	A	B	H	A	A	A	A	B	B	A	A
wsnp_Ex_c23720_32957892	2A	69.9826	205201694	B	H	A	B	B	B	B	B	A	B	A	B	A	B	B	A	A	A	B	B	A	B	A	A	A	A	B	A	A	A	A	A	A	A	B	A	B	H	A	A	A	A	B	B	A	A
wsnp_Ex_c42815_49298013	2A	69.9826		B	H	A	B	B	B	B	B	A	B	A	B	A	B	B	A	A	A	B	B	A	B	A	A	A	A	B	A	A	A	A	A	A	A	B	A	B	H	A	A	A	A	B	B	A	A
wsnp_Ex_rep_c67264_65795361	2A	69.9826	176892097	B	H	A	B	B	B	B	B	A	B	A	B	A	B	B	A	A	A	B	B	A	B	A	A	A	A	B	A	A	A	A	A	A	A	B	A	B	H	A	A	A	A	B	B	A	A
wsnp_Ku_c38662_47257696	2A	69.9826	360419448	B	H	A	B	B	B	B	B	A	B	A	B	A	B	B	A	A	A	B	B	A	B	A	A	A	A	B	A	A	A	A	A	A	A	B	A	B	H	A	A	A	A	B	B	A	A
wsnp_Ra_c10861_17763060	2A	69.9826	379064493	B	H	A	B	B	B	B	B	A	B	A	B	A	B	B	A	A	A	B	B	A	B	A	A	A	A	B	A	A	A	A	A	A	A	B	A	B	H	A	A	A	A	B	B	A	A
BS00032606_51	2A	70.5444	507387284	B	B	A	B	B	B	B	B	A	B	A	B	A	B	B	A	A	A	B	B	A	B	A	A	A	A	B	A	A	A	A	A	A	A	B	A	B	B	A	A	A	A	B	B	A	A
BS00063599_51	2A	70.5444		B	-	A	B	B	B	B	B	A	B	A	B	A	B	B	A	A	A	B	B	A	B	A	A	A	A	B	A	A	A	A	A	A	A	B	A	B	-	A	A	A	A	B	B	A	A
Excalibur_c640_464	2A	71.1062		B	-	A	B	B	B	B	B	A	B	A	B	A	B	B	A	A	A	B	B	A	B	A	A	A	A	B	A	A	A	A	A	A	A	B	A	B	-	A	A	A	A	B	B	A	A
IAAV444	2A	71.1062		B	H	A	B	B	B	B	B	A	B	A	B	A	B	B	A	A	A	B	B	A	B	A	A	A	A	B	A	A	A	A	A	A	A	B	A	B	H	A	A	A	A	B	B	A	A
Kukri_c11327_977	2A	71.1062		B	H	A	B	B	B	B	-	A	B	A	B	A	B	B	A	A	A	B	B	A	B	A	A	A	A	B	A	A	A	A	A	A	A	B	A	B	H	A	A	A	A	B	B	A	A
Kukri_c15489_626	2A	71.1062		B	H	A	B	B	B	B	B	A	B	A	B	A	B	B	A	A	A	B	B	A	B	A	A	A	A	B	A	A	A	A	A	A	A	B	A	B	H	A	A	A	A	B	B	A	A
RAC875_c11956_477	2A	71.1062		B	B	A	B	B	B	B	B	A	B	A	B	A	B	B	A	A	A	B	B	A	B	A	A	A	A	B	A	A	A	A	A	A	A	B	A	B	H	A	A	A	A	B	B	A	A
wsnp_Ex_c25057_34318425	2A	71.1062	505086981	B	H	A	B	B	B	B	B	A	B	A	B	A	B	B	A	A	A	B	B	A	B	A	A	A	A	B	A	A	A	A	A	A	A	B	A	B	H	A	A	A	A	B	B	A	A
wsnp_Ex_c31900_40635609	2A	71.1062	504076276	B	H	A	B	B	B	B	B	A	B	A	B	A	B	B	A	A	A	B	B	A	B	A	A	A	A	B	A	A	A	A	A	A	A	B	A	B	H	A	A	A	A	B	B	A	A
Excalibur_c84687_162	2A	72.2428		B	H	A	B	B	B	B	B	A	B	A	B	A	B	B	A	A	A	B	B	A	B	A	A	A	A	B	A	A	A	A	A	A	A	B	A	B	H	A	A	A	A	A	B	A	A
BobWhite_c1049_338	2A	72.811	555884744	B	B	A	B	B	B	B	B	A	B	A	B	A	B	B	A	A	A	B	B	A	B	A	A	A	A	-	A	A	A	A	A	A	A	B	A	B	-	A	A	A	A	A	B	A	A
BS00078116_51	2A	72.811		B	-	A	B	B	B	B	B	A	B	A	B	A	B	B	A	A	A	B	B	A	B	A	A	A	A	-	A	A	A	A	A	A	A	B	A	B	-	A	A	A	A	A	B	A	A
wsnp_Ex_c28204_37349164	2A	72.811	558526626	B	H	A	B	B	B	B	B	A	B	A	B	A	B	B	A	A	A	B	B	A	B	A	A	A	A	H	A	A	A	A	A	A	A	B	A	B	H	A	A	A	A	A	B	A	A
wsnp_Ex_c2337_4379619	2A	73.3857	585662292	B	H	A	B	B	H	B	B	A	B	A	B	A	B	B	A	A	A	B	B	B	B	A	A	A	A	H	A	A	A	A	A	A	A	B	A	B	H	A	A	A	A	A	B	A	A
Excalibur_c28017_641	2A	73.9671	603560931	B	H	A	B	B	H	B	H	A	B	A	B	A	B	B	A	A	A	B	B	B	B	A	A	A	A	H	A	A	A	A	A	A	A	B	A	B	H	A	A	A	A	A	B	A	A
Excalibur_c47535_389	2A	73.9671	603548455	B	H	A	B	B	H	B	B	A	B	A	B	A	B	B	A	A	A	B	B	B	B	A	A	A	A	H	A	A	A	A	A	A	A	B	A	B	H	A	A	A	A	A	B	A	A
wsnp_CAP8_c2677_1394934	2A	73.9671	603524503	B	H	A	B	B	H	B	B	A	B	A	B	A	B	B	A	A	A	B	B	B	B	A	A	A	A	H	A	A	A	A	A	A	A	B	A	B	H	A	A	A	A	A	B	A	A
Ku_c5710_312	2A	74.5485	605800209	B	H	A	B	B	H	B	B	A	B	A	B	A	B	B	A	A	A	B	B	B	B	A	A	A	A	A	H	A	A	A	A	A	A	B	A	B	H	A	A	A	A	A	B	A	A
Ra_c42714_1137	2A	74.5485	605801495	B	H	A	B	B	H	B	B	A	B	A	B	A	B	B	A	A	A	B	B	B	B	A	A	A	A	A	H	A	A	A	A	A	A	B	A	B	H	A	A	A	A	A	B	A	A
BS00049644_51	2A	75.1233		B	H	A	B	B	H	B	B	A	B	A	B	A	B	B	A	A	A	B	B	B	B	A	A	A	A	A	H	A	A	A	A	A	A	B	A	B	H	A	A	A	A	A	B	A	A
BS00041816_51	2A	76.314	611316368	B	A	A	B	B	H	B	B	A	B	A	B	A	B	B	A	A	A	B	B	B	B	A	A	A	A	A	H	A	A	A	A	A	A	B	A	B	H	A	A	A	A	A	B	A	A
Ra_c34214_1320	2A	76.314	611297444	B	A	A	B	B	H	B	B	A	B	A	B	A	B	B	A	A	A	B	B	B	B	A	A	A	A	A	H	A	A	A	A	A	A	B	A	B	H	A	A	A	A	A	B	A	A
Excalibur_c34913_743	2A	79.443	624460552	B	A	A	B	B	-	B	-	A	B	A	B	A	A	B	B	A	A	B	B	A	B	B	A	A	A	A	-	A	A	A	A	A	A	B	A	B	A	A	A	A	A	A	B	A	A
Tdurum_contig13653_471	2A	79.4431	481054302	B	A	A	B	B	H	B	B	A	B	A	B	A	A	B	B	A	A	B	B	A	B	B	A	A	A	A	H	A	A	A	A	A	A	B	A	B	A	A	A	A	A	A	B	A	A
BobWhite_c6356_87	2A	80.6061	646627756	B	A	A	B	B	H	B	B	A	B	A	B	A	A	B	B	A	A	B	B	A	B	B	A	A	A	A	H	A	A	A	A	A	A	B	A	B	A	A	A	A	A	A	B	A	A
IAAV2718	2A	86.3271	681106757	A	A	A	B	B	B	A	A	A	B	A	B	A	A	B	B	A	A	B	A	A	B	B	A	A	A	A	A	A	A	A	B	A	A	B	A	B	A	A	A	A	A	A	B	A	A
BS00010696_51	2A	87.4509	688619386	A	A	A	B	B	B	A	A	A	B	A	B	A	A	B	B	A	A	B	A	A	B	B	A	A	A	B	A	A	A	A	B	A	A	B	A	B	A	A	A	A	A	A	B	A	A
GENE-1381_110	2A	88.5874	690932208	A	A	A	B	B	B	A	-	A	B	A	B	A	A	B	B	A	A	B	A	A	B	B	A	A	A	B	A	A	A	A	B	A	A	B	A	B	A	B	A	A	A	A	A	A	A
GENE-1381_132	2A	88.5874	690932190	A	A	A	B	B	B	A	A	A	B	A	B	A	A	B	B	A	A	B	A	A	B	B	A	A	A	B	A	A	A	A	B	A	A	B	A	B	A	B	A	A	A	A	A	A	A
Excalibur_c6660_746	2A	89.1492	691218436	A	A	A	B	B	B	A	H	A	B	A	B	A	A	B	B	A	A	B	A	A	B	B	A	A	A	B	A	A	A	A	B	A	A	B	A	B	A	B	A	A	A	A	A	A	A
wsnp_Ku_c8927_15048149	2A	89.1492	691219077	A	A	A	B	B	B	A	B	A	B	A	B	A	A	B	B	A	A	B	A	A	B	B	A	A	A	B	A	A	A	A	B	A	A	B	A	B	A	B	A	A	A	A	A	A	A
BobWhite_c3833_815	2A	89.6987	692850266	A	A	A	B	B	B	A	A	A	B	A	B	A	A	B	B	A	A	B	A	A	B	B	A	A	A	B	A	A	A	A	B	A	A	B	A	B	A	B	A	A	A	A	A	A	A
IAAV2218	2A	89.6987	691224022	A	A	A	B	B	B	A	A	A	B	A	B	A	A	B	B	A	A	B	A	A	B	B	A	A	A	B	A	A	A	A	B	A	A	B	A	B	A	B	A	A	A	A	A	A	A
Ku_c8927_2075	2A	89.6987	691217652	A	A	A	B	B	B	A	A	A	B	A	B	A	A	B	B	A	A	B	A	A	B	B	A	A	A	B	A	A	A	A	B	A	A	B	A	B	A	B	A	A	A	A	A	A	A
Kukri_c62142_683	2A	89.6987	657072860	A	A	A	B	B	B	A	A	A	B	A	B	A	A	B	B	A	A	B	A	A	B	B	A	A	A	B	A	A	A	A	B	A	A	B	A	B	A	B	A	A	A	A	A	A	A
Kukri_c7193_5892	2A	89.6987	547678658	A	A	A	B	B	B	A	A	A	B	A	B	A	A	B	B	A	A	B	A	A	B	B	A	A	A	B	A	A	A	A	B	A	A	B	A	B	A	B	A	A	A	A	A	A	A
BS00035883_51	2A	90.2481		A	A	A	B	B	B	A	A	A	B	A	B	A	A	B	B	A	A	B	A	A	B	B	A	A	A	B	A	A	A	A	B	A	A	B	A	B	A	B	A	A	A	A	A	A	A
BS00039422_51	2A	90.2481	693292904	A	A	A	B	B	B	A	A	A	B	A	B	A	A	B	B	A	A	B	A	A	B	B	A	A	A	B	A	A	A	A	B	A	A	B	A	B	A	B	A	A	A	A	A	A	A
BS00089497_51	2A	90.2481	694753594	A	A	A	B	B	B	A	A	A	B	A	B	A	A	B	B	A	A	B	A	A	B	B	A	A	A	B	A	A	A	A	B	A	A	B	A	B	A	B	A	A	A	A	A	A	A
CAP12_rep_c6956_169	2A	90.2481	697291164	A	A	A	B	B	B	-	A	A	B	A	B	A	A	B	B	A	A	B	A	A	B	B	A	A	A	B	A	A	A	A	B	A	A	B	A	B	A	B	A	A	A	A	A	A	A
IAAV1698	2A	90.2481	694451138	A	A	A	B	B	B	A	A	A	B	A	B	A	A	B	B	A	A	B	A	A	B	B	A	A	A	B	A	A	A	A	B	A	A	B	A	B	A	B	A	A	A	A	A	A	A
Kukri_c29170_680	2A	90.2481	693293477	A	A	A	B	B	B	A	A	A	B	A	B	A	A	B	B	A	A	B	A	A	B	B	A	A	A	B	A	A	A	A	B	A	A	B	A	B	A	B	A	A	A	A	A	A	A
RAC875_c8093_605	2A	90.2481		A	A	A	B	B	B	A	A	A	B	A	B	A	A	B	B	A	A	B	A	A	B	B	A	A	A	B	A	A	A	A	B	A	A	B	A	B	A	B	A	A	A	A	A	A	A
RAC875_rep_c73777_485	2A	90.2481	696922958	A	A	A	B	B	B	H	A	A	B	A	B	A	A	B	B	A	A	B	A	A	B	B	A	A	A	B	A	A	A	A	B	A	A	B	A	B	A	B	A	A	A	A	A	A	A
BS00022666_51	2A	90.2482	694754648	A	A	A	B	B	B	A	A	A	B	A	B	A	A	B	B	A	A	B	A	A	B	B	A	A	A	B	A	A	A	A	B	A	A	B	A	B	A	B	A	A	A	A	A	A	A
BS00096882_51	2A	91.3847	700955058	A	A	A	B	B	B	H	A	A	B	A	B	A	A	B	B	A	A	B	A	A	B	B	A	A	A	B	A	A	A	A	B	A	A	B	A	B	A	B	A	A	A	A	A	A	A
Kukri_c44255_832	2A	91.3847	701482493	A	A	A	B	B	B	H	A	A	B	A	B	A	A	B	B	A	A	B	A	A	B	B	A	A	A	B	A	A	A	A	B	A	A	B	A	B	A	B	A	A	A	A	A	A	A
BS00029332_51	2A	92.5754		A	A	A	B	B	B	H	A	A	A	A	A	A	A	B	B	A	A	B	A	A	B	B	A	A	A	B	A	A	A	A	B	A	A	B	A	B	A	B	A	A	A	A	A	A	A
BS00086329_51	2A	92.5754	711077642	A	A	A	B	B	B	H	A	A	A	A	A	A	A	B	B	A	A	B	A	A	B	B	A	A	A	B	A	A	A	A	B	A	A	B	A	B	A	B	A	A	A	A	A	A	A
Excalibur_c3171_416	2A	92.5754	709850320	A	A	A	B	B	B	H	A	A	A	A	A	A	A	B	B	A	A	B	A	A	B	B	A	A	A	B	A	A	A	A	B	A	A	B	A	B	A	B	A	A	A	A	A	A	A
Excalibur_c47219_186	2A	92.5754	711641773	A	A	A	B	B	B	H	-	A	A	A	A	A	A	B	B	A	A	B	A	A	B	B	A	A	A	B	A	A	A	A	B	A	A	B	A	B	A	B	A	A	A	A	A	A	A
Excalibur_c7282_285	2A	92.5754		A	A	A	B	B	B	H	A	A	A	A	A	A	A	B	B	A	A	B	A	A	B	B	A	A	A	B	A	A	A	A	B	A	A	B	A	B	A	B	A	A	A	A	A	A	A
IAAV6408	2A	92.5754	711976227	A	A	A	B	B	B	H	A	A	A	A	A	A	A	B	B	A	A	B	A	A	B	B	A	A	A	B	A	A	A	A	B	A	A	B	A	B	A	B	A	A	A	A	A	A	A
Ku_c69608_894	2A	92.5754	712577973	A	A	A	B	B	B	H	A	A	A	A	A	A	A	B	B	A	A	B	A	A	B	B	A	A	A	B	A	A	A	A	B	A	A	B	A	B	A	B	A	A	A	A	A	A	A
wsnp_Ex_c23768_33006588	2A	92.5754	710097673	A	A	A	B	B	B	H	A	A	A	A	A	A	A	B	B	A	A	B	A	A	B	B	A	A	A	B	A	A	A	A	B	A	A	B	A	B	A	B	A	A	A	A	A	A	A
wsnp_Ex_rep_c66358_64543089	2A	92.5754	709701746	A	A	A	B	B	B	H	A	A	A	A	A	A	A	B	B	A	A	B	A	A	B	B	A	A	A	B	A	A	A	A	B	A	A	B	A	B	A	B	A	A	A	A	A	A	A
wsnp_Ex_rep_c66358_64543401	2A	92.5754	709701322	A	A	A	B	B	B	H	A	A	A	A	A	A	A	B	B	A	A	B	A	A	B	B	A	A	A	B	A	A	A	A	B	A	A	B	A	B	A	B	A	A	A	A	A	A	A
wsnp_Ku_c54793_58953037	2A	92.5754	682040328	A	A	A	B	B	B	H	A	A	A	A	A	A	A	B	B	A	A	B	A	A	B	B	A	A	A	B	A	A	A	A	B	A	A	B	A	B	A	B	A	A	A	A	A	A	A
wsnp_Ra_c10658_17500498	2A	92.5754	689871439	A	A	A	B	B	B	H	A	A	A	A	A	A	A	B	B	A	A	B	A	A	B	B	A	A	A	B	A	A	A	A	B	A	A	B	A	B	A	B	A	A	A	A	A	H	A
GENE-2352_964	2A	93.1436		H	A	A	B	B	B	H	A	A	A	A	A	A	A	B	B	A	A	B	A	A	B	B	A	A	A	A	A	A	A	A	B	A	A	B	A	B	A	B	A	A	A	A	A	A	A
Jagger_c9554_114	2A	93.1436		B	A	A	B	B	B	-	-	A	A	A	A	A	A	B	B	A	A	B	A	A	B	B	A	A	A	A	A	A	A	A	B	A	A	B	A	B	A	B	A	A	A	A	A	A	A
wsnp_Ex_c10751_17505459	2A	93.1436	716903314	H	A	A	B	B	B	H	A	A	A	A	A	A	A	B	B	A	A	B	A	A	B	B	A	A	A	A	A	A	A	A	B	A	A	B	A	B	A	B	A	A	A	A	A	A	A
wsnp_Ex_c59095_60108185	2A	93.1436		H	A	A	B	B	B	H	A	A	A	A	A	A	A	B	B	A	A	B	A	A	B	B	A	A	A	A	A	A	A	A	B	A	A	B	A	B	A	B	A	A	A	A	A	A	A
wsnp_Ra_c32271_41304469	2A	93.1436		H	A	A	B	B	B	H	A	A	A	A	A	A	A	B	B	A	A	B	A	A	B	B	A	A	A	A	A	A	A	A	B	A	A	B	A	B	A	B	A	A	A	A	A	A	A
BS00093201_51	2A	94.909		H	A	A	B	B	B	H	A	A	A	A	A	A	A	B	B	A	A	B	A	A	B	B	B	A	A	A	A	A	A	A	B	A	A	B	A	B	A	B	A	A	A	A	A	A	B
Tdurum_contig33398_106	2A	96.0587	718885461	H	A	A	B	B	B	H	A	A	A	A	A	A	A	B	B	A	A	B	A	A	B	B	B	A	A	A	A	A	A	A	B	A	A	B	A	B	A	B	A	A	A	A	A	A	B
RAC875_rep_c107961_348	2A	110.871		H	B	B	B	B	B	B	A	A	A	B	A	A	A	B	A	B	A	B	A	A	B	B	H	A	A	A	A	A	B	B	B	B	A	B	A	B	H	B	A	A	B	A	A	A	A
BS00022813_51	2A	120.266	741371804	A	B	H	B	B	B	B	A	A	A	B	A	A	B	A	B	B	A	A	A	A	B	A	B	B	A	A	A	A	B	B	B	B	A	A	A	B	A	B	A	A	B	A	A	B	A
BS00077768_51	2A	120.266		A	B	H	B	B	B	B	A	A	A	B	A	A	B	A	B	B	A	A	A	A	B	A	B	B	A	A	A	A	B	B	B	B	A	A	A	B	A	B	A	A	B	A	A	B	A
BS00077769_51	2A	120.266		A	B	H	B	B	B	B	A	A	A	B	A	A	B	A	B	B	A	A	A	A	B	A	B	B	A	A	A	A	B	B	B	B	A	A	A	B	A	B	A	A	B	A	A	B	A
BS00110128_51	2A	120.266	608540121	A	B	H	B	B	B	B	A	A	A	B	A	A	B	A	B	B	A	A	A	A	B	A	B	B	A	A	A	A	B	B	B	B	A	A	A	B	A	B	A	A	B	A	A	B	A
Ex_c5740_1133	2A	120.266	740848583	A	B	H	B	B	B	B	A	A	A	B	A	A	B	A	B	B	A	A	A	A	B	A	B	B	A	A	A	A	B	B	B	B	A	A	A	B	A	B	A	A	B	A	A	B	A
Kukri_c25978_561	2A	120.266	740361058	A	B	H	B	B	B	B	A	A	A	B	A	A	B	A	B	B	A	A	A	A	B	A	B	B	A	A	A	A	B	B	B	B	A	A	A	B	A	B	A	A	B	A	A	B	A
RAC875_c33037_578	2A	120.266	742136425	A	B	H	B	B	B	B	A	A	A	B	A	A	B	A	B	B	A	A	A	A	B	A	B	B	A	A	A	A	B	B	B	B	A	A	A	B	A	B	A	A	B	A	A	B	A
wsnp_Ex_c5740_10081171	2A	120.266	740847864	A	B	H	B	B	B	B	A	A	A	B	A	A	B	A	B	B	A	A	A	A	B	A	B	B	A	A	A	A	B	B	B	B	A	A	A	B	A	B	A	A	B	A	A	B	A
wsnp_Ex_rep_c70299_69243401	2A	120.266	740361540	A	B	H	B	B	B	B	A	A	A	B	A	A	B	A	B	B	A	A	A	A	B	A	B	B	A	A	A	A	B	B	B	B	A	A	A	B	A	B	A	A	B	A	A	B	A
wsnp_Ex_rep_c70299_69243835	2A	120.266	740361107	A	B	H	B	B	B	B	A	A	A	B	A	A	B	A	B	B	A	A	A	A	B	A	B	B	A	A	A	A	B	B	B	B	A	A	A	B	A	B	A	A	B	A	A	B	A
wsnp_Ra_c66636_64922359	2A	120.266		A	B	H	B	B	B	B	A	A	A	B	A	A	B	A	B	B	A	A	A	A	B	A	B	B	A	A	A	A	B	B	B	B	A	A	A	B	A	B	A	A	B	A	A	B	A
IACX5800	2A	121.429	743096726	A	B	H	B	B	B	B	A	A	A	B	A	A	B	A	B	B	A	A	A	B	B	A	B	B	A	A	A	A	B	B	B	B	A	A	A	B	A	B	A	A	B	A	A	B	A
RAC875_c25848_122	2A	121.429	742720804	A	B	H	B	B	B	B	H	A	A	B	A	A	B	A	B	B	A	A	A	B	B	A	B	B	A	A	A	A	B	B	B	B	A	A	A	B	A	B	A	A	B	A	A	B	A
BobWhite_c31163_694	2A	125.871	746682372	A	B	H	B	B	B	B	A	A	A	B	A	A	H	A	B	B	B	A	B	B	B	A	B	A	A	A	A	A	B	B	B	A	A	A	A	B	A	B	A	A	B	A	A	B	A
RFL_Contig927_1591	2A	125.871	746682413	A	B	H	B	B	B	B	A	A	A	B	A	A	H	A	B	B	B	A	B	B	B	A	B	A	A	A	A	A	B	B	B	A	A	A	A	B	A	B	A	A	B	A	A	B	A
Tdurum_contig82404_354	2A	125.871	746682413	A	B	H	B	B	B	B	A	A	A	B	A	A	H	A	B	B	B	A	B	B	B	A	B	A	A	A	A	A	B	B	B	A	A	A	A	B	A	B	A	A	B	A	A	B	A
BS00000209_51	2A	126.452		A	B	B	B	B	B	B	A	A	A	A	A	A	H	A	B	B	B	A	B	B	B	A	B	A	A	A	A	A	B	B	B	A	A	A	A	B	A	B	A	A	B	A	A	B	A
Tdurum_contig84245_154	2A	126.452	746761671	A	B	B	B	B	B	B	H	A	A	A	A	A	H	A	B	B	B	A	B	B	B	A	B	A	A	A	A	A	B	B	B	A	A	A	A	B	A	B	A	A	B	A	A	B	A
BobWhite_c4517_120	2A	129.543	751663232	A	A	B	H	B	B	B	A	A	A	A	A	A	H	-	B	B	B	A	B	B	B	A	B	-	-	A	A	-	B	B	B	A	A	A	A	B	A	B	A	-	B	B	A	B	H
BobWhite_c5178_188	2A	129.543	751511217	A	A	B	H	B	B	B	A	A	A	A	A	A	H	A	B	B	B	A	B	B	B	A	B	A	A	A	A	A	B	B	B	A	A	A	A	B	A	B	A	A	B	B	A	B	H
BS00023202_51	2A	129.543	751420206	A	A	B	H	B	B	B	A	A	A	A	A	A	H	A	B	B	B	A	B	B	B	A	B	A	A	A	A	A	B	B	B	A	A	A	A	B	A	B	A	A	B	B	A	B	H
BobWhite_c15773_166	2A	130.176		A	A	B	H	B	B	B	A	A	A	A	A	A	H	A	B	B	B	A	B	B	B	A	B	A	A	A	A	A	B	B	B	A	A	A	A	B	A	B	A	A	B	B	A	B	H
CAP7_c4056_108	2A	130.176	760890405	A	A	B	-	B	B	B	A	A	A	A	A	A	-	A	B	B	B	A	B	B	B	A	B	A	A	A	A	A	B	B	B	A	A	A	A	B	A	B	A	A	B	B	A	B	-
Excalibur_c20439_825	2A	133.886	753987428	A	A	B	H	B	B	A	H	A	A	A	A	A	H	A	B	B	B	A	B	B	B	A	B	A	A	A	B	A	B	B	B	A	A	A	A	B	A	B	A	A	B	B	A	B	A
BS00063368_51	2A	134.461	754356931	A	A	B	H	B	B	A	B	A	A	A	A	A	H	A	B	B	B	A	B	B	B	A	B	A	A	A	B	A	B	B	B	A	A	A	A	B	A	B	A	A	B	B	A	B	A
RAC875_c1706_1888	2A	134.461	755776336	A	A	B	H	B	B	A	B	A	A	A	A	A	H	A	B	B	B	A	B	B	B	A	B	A	A	A	B	A	B	B	B	A	A	A	A	B	A	B	A	A	B	B	A	B	A
BS00096927_51	2A	135.042	755789414	A	A	B	H	B	B	A	B	A	A	A	A	A	H	A	B	B	B	A	B	B	B	A	B	A	A	A	B	A	B	B	B	A	A	A	A	B	A	B	A	A	B	B	A	B	A
CAP12_c575_105	2A	135.042	743238069	A	A	B	H	B	B	A	B	A	A	A	A	A	H	A	B	B	B	A	B	B	B	A	B	A	A	A	B	A	B	B	B	A	A	A	A	B	A	B	A	A	B	B	A	B	A
IAAV880	2A	135.042	755788434	A	A	B	H	B	B	A	B	A	A	A	A	A	H	A	B	B	B	A	B	B	B	A	B	A	A	A	B	A	B	B	B	A	A	A	A	B	A	B	A	A	B	B	A	B	A
Tdurum_contig56321_232	2A	136.247		A	A	B	H	B	B	A	-	A	A	A	A	A	H	A	B	B	H	A	B	B	B	H	B	A	A	A	B	A	B	B	B	A	A	A	A	B	A	B	B	A	B	B	A	B	A
RAC875_c27530_860	2A	138.719	630395071	A	A	B	H	B	B	A	-	A	B	A	B	A	H	H	A	B	H	A	B	B	B	H	B	A	A	A	B	A	B	B	B	A	A	A	A	B	A	B	B	A	B	B	A	B	A
Tdurum_contig8350_350	2A	141.887	633606394	A	A	B	H	B	A	A	B	B	B	A	B	A	H	-	A	B	-	A	B	B	B	H	B	A	A	A	B	A	B	B	B	A	A	A	A	B	A	B	B	A	B	B	A	B	A
RAC875_c5577_1682	2B	0	4950037	A	B	B	B	B	B	A	-	A	B	A	B	A	B	B	A	A	A	B	B	A	A	B	A	A	B	A	B	B	A	A	B	B	A	A	A	B	B	B	A	B	B	A	A	A	B
Excalibur_c39493_251	2B	0.5682	6210321	A	B	B	B	B	B	A	B	A	B	A	B	A	B	B	A	A	A	B	H	A	A	B	A	A	B	A	B	B	A	A	B	B	A	A	A	B	B	B	A	B	B	A	A	A	B
Kukri_rep_c97239_133	2B	0.5682	6210157	A	B	B	B	B	B	A	H	A	B	A	B	A	B	B	A	A	A	B	H	A	A	B	A	A	B	A	B	B	A	A	B	B	A	A	A	B	B	B	A	B	B	A	A	A	B
RAC875_c34512_493	2B	0.5682	3798071	A	B	B	B	B	B	A	H	A	B	A	B	A	B	B	A	A	A	B	H	A	A	B	A	A	B	A	B	B	A	A	B	B	A	A	A	B	B	B	A	B	B	A	A	A	B
RAC875_c34512_685	2B	0.5682	5234943	A	B	B	B	B	B	A	H	A	B	A	B	A	B	B	A	A	A	B	H	A	A	B	A	A	B	A	B	B	A	A	B	B	A	A	A	B	B	B	A	B	B	A	A	A	B
Excalibur_c34937_710	2B	1.1364	4988304	A	B	B	B	B	B	A	-	A	B	A	B	A	B	B	A	A	A	B	H	A	A	B	A	A	B	A	B	B	A	A	B	B	A	A	A	B	B	B	A	B	B	A	A	A	B
tplb0034e07_1869	2B	1.7111	6311327	A	B	B	B	B	B	A	A	A	B	A	B	A	B	B	A	A	A	B	H	A	A	B	A	A	B	A	B	B	A	A	B	B	A	A	A	B	B	B	A	B	B	A	A	A	B
tplb0034e07_718	2B	2.2925	6313903	A	B	B	B	B	B	A	H	A	B	A	B	A	B	B	A	A	A	B	H	A	A	B	A	A	B	A	B	B	A	A	B	B	A	A	A	B	B	B	A	B	B	A	A	A	B
BS00058815_51	2B	2.8739	7436731	A	B	B	B	B	B	A	-	A	B	A	B	A	B	B	A	A	A	B	H	A	A	B	A	A	B	B	B	B	A	A	B	B	A	A	A	B	B	B	A	B	B	A	A	A	B
Excalibur_c29417_499	2B	2.8739	7429446	A	B	B	B	B	B	A	A	A	B	A	B	A	B	B	A	A	A	B	H	A	A	B	A	A	B	B	B	B	A	A	B	B	A	A	A	B	B	B	A	B	B	A	A	A	B
Excalibur_c42248_663	2B	2.8739	6844561	A	B	B	B	B	B	A	H	A	B	A	B	A	B	B	A	A	A	B	H	A	A	B	A	A	B	B	B	B	A	A	B	B	A	A	A	B	B	B	A	B	B	A	A	A	B
IACX6340	2B	2.8739		A	B	B	B	B	B	A	H	A	B	A	B	A	B	B	A	A	A	B	H	A	A	B	A	A	B	B	B	B	A	A	B	B	A	A	A	B	B	B	A	B	B	A	A	A	B
tplb0054d13_2445	2B	2.8739	9740994	A	B	B	B	B	B	A	A	A	B	A	B	A	B	B	A	A	A	B	H	A	A	B	A	A	B	B	B	B	A	A	B	B	A	A	A	B	B	B	A	B	B	A	A	A	B
wsnp_Ku_c3663_6748611	2B	3.4421		A	B	B	B	B	B	A	B	A	B	A	B	A	B	B	A	A	A	B	H	A	A	B	A	A	B	B	B	B	A	A	B	B	A	A	A	B	B	B	A	B	B	A	A	A	B
BobWhite_c11397_231	2B	4.0103		A	B	B	B	B	B	A	H	A	B	A	B	A	B	B	A	A	A	B	H	A	A	B	A	A	B	B	B	B	A	A	B	B	A	A	A	B	B	B	A	B	B	A	A	A	B
BobWhite_c17047_268	2B	4.0103	11077371	A	B	B	B	B	B	A	A	A	B	A	B	A	B	B	A	A	A	B	-	A	A	B	A	A	B	B	B	B	A	A	B	B	A	A	A	B	B	B	A	B	B	A	A	A	B
BS00067280_51	2B	4.0103		A	B	B	B	B	B	A	B	A	B	A	B	A	B	B	A	A	A	B	H	A	A	B	A	A	B	B	B	B	A	A	B	B	A	A	A	B	B	B	A	B	B	A	A	A	B
Ex_c525_1401	2B	4.0103	6338781	A	B	B	B	B	B	A	H	A	B	A	B	A	B	B	A	A	A	B	H	A	A	B	A	A	B	B	B	B	A	A	B	B	A	A	A	B	B	B	A	B	B	A	A	A	B
Excalibur_c2656_3198	2B	4.0103	7430956	A	B	B	B	B	B	A	A	A	B	A	B	A	B	B	A	A	A	B	H	A	A	B	A	A	B	B	B	B	A	A	B	B	A	A	A	B	B	B	A	B	B	A	A	A	B
Excalibur_c29417_400	2B	4.0103	7429545	A	B	B	B	B	B	A	A	A	B	A	B	A	B	B	A	A	A	B	H	A	A	B	A	A	B	B	B	B	A	A	B	B	A	A	A	B	B	B	A	B	B	A	A	A	B
GENE-1442_78	2B	4.0103	6337735	A	B	B	B	B	B	A	H	A	B	A	B	A	B	B	A	A	A	B	H	A	A	B	A	A	B	B	B	B	A	A	B	B	A	A	A	B	B	B	A	B	B	A	A	A	B
Kukri_c3701_392	2B	4.0103		A	B	B	B	B	B	A	H	A	B	A	B	A	B	B	A	A	A	B	H	A	A	B	A	A	B	B	B	B	A	A	B	B	A	A	A	B	B	B	A	B	B	A	A	A	B
Kukri_c6306_1151	2B	4.0103	7436667	A	B	B	B	B	B	A	-	A	B	A	B	A	B	B	A	A	A	B	H	A	A	B	A	A	B	B	B	B	A	A	B	B	A	A	A	B	B	B	A	B	B	A	A	A	B
TA007378-0375	2B	4.0103		A	B	B	B	B	B	A	A	A	B	A	B	A	B	B	A	A	A	B	H	A	A	B	A	A	B	B	B	B	A	A	B	B	A	A	A	B	B	B	A	B	B	A	A	A	B
Tdurum_contig10208_447	2B	4.0103	275271	A	B	B	B	B	B	A	H	A	B	A	B	A	B	B	A	A	A	B	H	A	A	B	A	A	B	B	B	B	A	A	B	B	A	A	A	B	B	B	A	B	B	A	A	A	B
wsnp_Ex_c10961_17803258	2B	4.0103	8250178	A	B	B	B	B	B	A	H	A	B	A	B	A	B	B	A	A	A	B	H	A	A	B	A	A	B	B	B	B	A	A	B	B	A	A	A	B	B	B	A	B	B	A	A	A	B
wsnp_Ra_c1501_2991585	2B	4.0103	6338184	A	B	B	B	B	B	A	H	A	B	A	B	A	B	B	A	A	A	B	H	A	A	B	A	A	B	B	B	B	A	A	B	B	A	A	A	B	B	B	A	B	B	A	A	A	B
Excalibur_rep_c107769_116	2B	5.1469	5666766	A	B	B	B	B	B	A	B	A	B	A	B	A	B	B	A	A	A	B	A	A	A	B	A	A	B	A	B	B	A	A	B	B	A	A	A	B	B	B	A	B	B	A	A	A	B
RAC875_rep_c71112_400	2B	6.7958	4990423	A	B	B	B	B	B	A	A	A	B	A	B	A	B	B	A	A	A	B	A	A	A	B	A	A	B	A	B	B	A	A	B	B	A	A	A	B	B	B	A	B	B	A	A	A	B
Ra_c11464_294	2B	7.9865	1331375	A	B	B	B	B	B	A	B	A	B	A	B	A	B	B	A	A	A	B	A	A	A	A	H	A	B	A	B	B	A	A	B	B	A	A	A	B	B	B	A	B	B	A	A	A	B
Ra_c491_902	2B	7.9865		A	B	B	B	B	B	A	H	A	B	A	B	A	B	B	A	A	A	B	A	A	A	A	-	A	B	A	B	B	A	A	B	B	A	A	A	B	B	B	A	B	B	A	A	A	B
RAC875_rep_c115433_378	2B	7.9865	4284955	A	B	B	B	B	B	A	-	A	B	A	B	A	B	B	A	A	A	B	A	A	A	A	-	A	B	A	B	B	A	A	B	B	A	A	A	B	B	B	A	B	B	A	A	A	B
wsnp_Ex_c1996_3754394	2B	7.9865		A	B	B	B	B	B	A	-	A	B	A	B	A	B	B	A	A	A	B	A	A	A	A	-	A	B	A	B	B	A	A	B	B	A	A	A	B	B	B	A	B	B	A	A	A	B
wsnp_Ex_c326_636368	2B	7.9865		A	B	B	B	B	B	A	B	A	B	A	B	A	B	B	A	A	A	B	A	A	A	A	H	A	B	A	B	B	A	A	B	B	A	A	A	B	B	B	A	B	B	A	A	A	B
wsnp_Ra_c1660_3275687	2B	7.9865		A	B	B	B	B	B	A	H	A	B	A	B	A	B	B	A	A	A	B	A	A	A	A	H	A	B	A	B	B	A	A	B	B	A	A	A	B	B	B	A	B	B	A	A	A	B
wsnp_Ex_c7776_13247365	2B	8.5679	4637555	A	B	B	B	B	B	A	H	A	B	A	B	A	B	B	A	A	A	B	A	A	A	A	H	A	B	A	B	B	A	A	B	B	A	A	A	B	B	B	A	B	B	A	A	A	B
wsnp_JD_c640_960796	2B	8.5679	4644652	A	B	B	B	B	B	A	H	A	B	A	B	A	B	B	A	A	A	B	A	A	A	A	H	A	B	A	B	B	A	A	B	B	A	A	A	B	B	B	A	B	B	A	A	A	B
IACX8446	2B	9.1427	4665281	A	B	B	B	B	B	A	H	A	B	A	B	A	B	B	A	A	A	B	A	A	A	A	A	A	B	A	B	B	A	A	B	B	A	A	A	B	B	B	A	B	B	A	A	A	B
Kukri_c30847_551	2B	9.1427	4664535	A	B	B	B	B	B	A	H	A	B	A	B	A	B	B	A	A	A	B	A	A	A	A	H	A	B	A	B	B	A	A	B	B	A	A	A	B	B	B	A	B	B	A	A	A	B
Kukri_c1175_1577	2B	10.2664	11291126	A	B	B	B	B	B	A	B	A	B	A	B	A	B	B	A	A	A	B	A	B	A	A	A	A	B	A	B	B	A	A	A	B	A	A	A	B	B	B	A	B	B	A	A	A	B
Excalibur_c30167_243	2B	11.9337	11396081	A	B	B	B	B	B	A	A	A	B	A	B	A	B	B	A	A	A	B	A	B	B	A	B	A	B	A	B	B	-	A	A	B	A	A	A	B	B	B	A	B	B	A	A	A	B
Excalibur_c841_609	2B	11.9337	17390904	A	B	B	B	B	B	A	A	A	B	A	B	A	B	B	A	A	A	B	A	B	B	A	B	A	B	A	B	B	A	A	A	B	A	A	A	B	B	B	A	B	B	A	A	A	B
Kukri_c16758_443	2B	11.9337	17389176	A	B	B	B	B	B	A	A	A	B	A	B	A	B	B	A	A	A	B	A	B	B	A	B	A	B	A	B	B	A	A	A	B	A	A	A	B	B	B	A	B	B	A	A	A	B
GENE-1018_99	2B	12.5151	17783428	A	B	B	B	B	B	A	H	A	B	A	B	A	B	B	A	A	A	B	A	B	B	A	B	A	B	A	B	B	A	A	A	B	A	A	A	B	B	B	A	B	B	A	A	A	B
BS00081871_51	2B	13.7058	12076610	A	B	B	B	B	B	A	-	A	B	A	B	A	B	B	A	A	A	B	A	B	A	A	H	A	B	A	B	B	A	A	A	B	A	A	A	B	B	B	A	B	B	A	A	A	B
BS00061979_51	2B	14.2941	20077015	A	B	B	B	B	B	A	H	A	B	A	B	A	B	B	A	A	A	B	A	B	B	A	A	A	B	A	B	B	A	A	A	B	A	A	A	B	B	B	A	B	B	A	A	A	B
Excalibur_c41459_96	2B	14.2941	18263074	A	B	B	B	B	B	A	A	A	B	A	B	A	B	B	A	A	A	B	A	B	B	A	A	A	B	A	B	B	A	A	A	B	A	A	A	B	B	B	A	B	B	A	A	A	B
Excalibur_c4748_360	2B	14.2941		A	B	B	B	B	B	A	H	A	B	A	B	A	B	B	A	A	A	B	A	B	B	A	A	A	B	A	B	B	A	A	A	B	A	A	A	B	B	B	A	B	B	A	A	A	B
RAC875_c2300_1021	2B	14.2941	12340138	A	B	B	B	B	B	A	-	A	B	A	B	A	B	B	A	A	A	B	A	B	B	A	A	A	B	A	B	B	A	A	A	B	A	A	A	B	B	B	A	B	B	A	A	A	B
Tdurum_contig49928_424	2B	25.9281	11843287	A	B	B	B	B	B	A	H	A	B	B	B	A	B	B	B	A	B	B	A	B	B	A	A	B	B	H	B	B	B	B	A	B	A	H	A	B	B	B	A	B	B	A	B	A	B
Excalibur_c12135_100	2B	50.9281	97932969	B	A	B	A	B	A	A	H	B	A	B	A	B	A	H	B	A	A	A	B	B	A	B	A	B	B	A	A	B	B	H	B	A	B	A	B	B	B	A	B	A	H	B	A	A	B
Kukri_c5904_80	2B	50.9281	66580923	B	A	B	A	B	A	A	H	B	A	B	A	B	A	H	B	A	A	A	B	B	A	B	A	B	B	A	A	B	B	H	B	A	B	A	B	B	B	A	B	A	H	B	A	A	B
Excalibur_c21220_88	2B	57.7265	44922004	A	A	B	A	B	B	A	A	B	A	B	A	B	A	B	B	A	A	A	B	B	A	B	A	B	B	A	B	B	B	H	B	B	B	A	B	B	B	A	B	B	H	B	A	A	B
Excalibur_c53516_119	2B	57.7265	28633670	A	A	B	A	B	B	A	A	B	A	B	A	B	A	B	B	A	A	A	B	B	A	B	A	B	B	A	B	B	B	H	B	B	B	A	B	B	B	A	B	B	H	B	A	A	B
Excalibur_c7963_1722	2B	57.7265	31085334	A	A	B	A	B	B	A	-	B	A	B	A	B	A	B	B	A	A	A	B	B	A	B	A	B	B	A	B	B	B	-	B	B	B	A	B	B	B	A	B	B	H	B	A	A	B
Ku_c41677_924	2B	57.7265	45537579	A	A	B	A	B	B	A	A	B	A	B	A	B	A	B	B	A	A	A	B	B	A	B	A	B	B	A	B	B	B	H	B	B	B	A	B	B	B	A	B	B	H	B	A	A	B
Kukri_c29640_92	2B	57.7265	47168996	A	A	B	A	B	B	A	-	B	A	B	A	B	A	B	B	A	A	A	B	B	A	B	A	B	B	A	B	B	B	-	B	B	B	A	B	B	B	A	B	B	H	B	A	A	B
Kukri_rep_c106290_204	2B	57.7265	31086270	A	A	B	A	B	B	A	H	B	A	B	A	B	A	B	B	A	A	A	B	B	A	B	A	B	B	A	B	B	B	H	B	B	B	A	B	B	B	A	B	B	H	B	A	A	B
RAC875_c21868_792	2B	57.7265	45788614	A	A	B	A	B	B	A	A	B	A	B	A	B	A	B	B	A	A	A	B	B	A	B	A	B	B	A	B	B	B	H	B	B	B	A	B	B	B	A	B	B	H	B	A	A	B
wsnp_Ex_c163_321026	2B	57.7265	44426840	A	A	B	A	B	B	A	A	B	A	B	A	B	A	B	B	A	A	A	B	B	A	B	A	B	B	A	B	B	B	H	B	B	B	A	B	B	B	A	B	B	H	B	A	A	B
wsnp_Ex_c56027_58308093	2B	57.7265	45790305	A	A	B	A	B	B	A	A	B	A	B	A	B	A	B	B	A	A	A	B	B	A	B	A	B	B	A	B	B	B	H	B	B	B	A	B	B	B	A	B	B	H	B	A	A	B
BS00077914_51	2B	58.3079	42281570	A	A	B	A	B	B	A	A	B	A	B	A	B	A	B	B	A	A	A	B	B	A	B	A	B	B	A	B	B	B	H	B	B	B	A	B	B	B	A	B	B	H	B	A	A	-
Excalibur_c100910_239	2B	60.1159	40510392	A	A	B	A	B	B	A	A	B	A	B	A	B	A	B	B	A	A	A	B	B	A	B	A	B	B	A	B	B	B	H	B	B	B	A	B	B	B	A	B	B	A	B	A	A	B
wsnp_Ex_c1962_3696265	2B	60.1159	40067881	A	A	B	A	B	B	A	A	B	A	B	A	B	A	B	B	A	A	A	B	B	A	B	A	B	B	A	B	B	B	H	B	B	B	A	B	B	B	A	B	B	A	B	A	A	B
wsnp_Ex_rep_c72511_70872203	2B	60.1159		A	A	B	A	B	B	A	A	B	A	B	A	B	A	B	B	A	A	A	B	B	A	B	A	B	B	A	B	B	B	H	B	B	B	A	B	B	B	A	B	B	A	B	A	A	B
wsnp_Ku_c4962_8872507	2B	60.1159	40448044	A	A	B	A	B	B	A	A	B	A	B	A	B	A	B	B	A	A	A	B	B	A	B	A	B	B	A	B	B	B	H	B	B	B	A	B	B	B	A	B	B	A	B	A	A	B
BS00055665_51	2B	61.2789		A	A	B	A	B	B	A	A	B	A	B	A	B	A	B	B	A	A	A	B	B	A	B	A	B	B	A	B	B	B	H	B	B	B	A	B	B	B	A	B	B	A	B	A	A	B
RAC875_c31358_214	2B	61.2789	41145744	A	A	B	A	B	B	A	H	B	A	B	A	B	A	B	B	A	A	A	B	B	A	B	A	B	B	A	B	B	B	H	B	B	B	A	B	B	B	A	B	B	A	B	A	A	B
BobWhite_rep_c63363_160	2B	61.8603	43615989	A	A	B	A	B	B	A	A	B	A	B	A	B	A	B	B	A	A	A	B	B	A	B	A	B	B	A	B	B	B	H	B	B	B	A	B	B	B	A	B	B	H	B	A	A	B
BobWhite_rep_c65082_84	2B	61.8603		A	A	B	A	B	B	A	A	B	A	B	A	B	A	B	B	A	A	A	B	B	A	B	A	B	B	A	B	B	B	H	B	B	B	A	B	B	B	A	B	B	H	B	A	A	B
Excalibur_c20050_133	2B	61.8603	28732539	A	A	B	A	B	B	A	A	B	A	B	A	B	A	B	B	A	A	A	B	B	A	B	A	B	B	A	B	B	B	A	B	B	B	A	B	B	B	A	B	B	A	B	A	A	B
Kukri_c28478_750	2B	61.8603	46090280	A	A	B	A	B	B	A	A	B	A	B	A	B	A	B	B	A	A	A	B	B	A	B	A	B	B	A	B	B	B	A	B	B	B	A	B	B	B	A	B	B	A	B	A	A	B
Kukri_rep_c103893_875	2B	61.8603	42953625	A	A	B	A	B	B	A	A	B	A	B	A	B	A	B	B	A	A	A	B	B	A	B	A	B	B	A	B	B	B	H	B	B	B	A	B	B	B	A	B	B	H	B	A	A	B
wsnp_JD_c42879_30043973	2B	61.8603	43629665	A	A	B	A	B	B	A	A	B	A	B	A	B	A	B	B	A	A	A	B	B	A	B	A	B	B	A	B	B	B	H	B	B	B	A	B	B	B	A	B	B	H	B	A	A	B
wsnp_JD_c8085_9129899	2B	61.8603	29166968	A	A	B	A	B	B	A	A	B	A	B	A	B	A	B	B	A	A	A	B	B	A	B	A	B	B	A	B	B	B	H	B	B	B	A	B	B	B	A	B	B	H	B	A	A	B
BobWhite_c5072_107	2B	61.8604	44191094	A	A	B	A	B	B	A	A	B	A	B	A	B	A	B	B	A	A	A	B	B	A	B	A	B	B	A	B	B	B	H	B	B	B	A	B	B	B	A	B	B	-	B	A	A	B
RAC875_c17720_436	2B	63.037	47181316	A	A	B	A	B	A	A	A	B	A	B	A	B	A	B	B	A	A	A	B	B	A	B	A	B	B	A	B	B	B	-	B	B	B	A	B	B	B	A	B	B	H	B	A	A	B
TA005292-0114	2B	64.2137		A	A	B	A	B	A	A	-	B	A	B	A	B	A	B	B	A	A	A	B	B	A	B	A	B	B	A	B	B	B	H	B	A	B	A	B	B	B	A	B	B	H	B	A	A	B
wsnp_Ra_c407_862316	2B	64.2137	53464964	A	A	B	A	B	A	A	A	B	A	B	A	B	A	B	B	A	A	A	B	B	A	B	A	B	B	A	B	B	B	H	B	A	B	A	B	B	B	A	B	B	H	B	A	A	B
IACX1098	2B	64.8162	58324675	A	A	B	A	B	A	A	H	B	A	B	A	B	A	B	B	A	A	A	B	B	A	B	A	B	B	A	B	B	B	H	B	A	B	A	B	B	B	A	B	B	H	B	A	A	B
Kukri_c26288_419	2B	64.8162	56784859	A	A	B	A	B	A	A	H	B	A	B	A	B	A	B	B	A	A	A	B	B	A	B	A	B	B	A	B	B	B	H	B	A	B	A	B	B	B	A	B	B	H	B	A	A	B
BobWhite_c41535_52	2B	65.4114	58979395	A	A	B	A	B	A	A	H	B	A	B	A	B	A	B	B	A	A	A	B	B	A	B	A	B	B	A	B	B	A	A	B	A	B	A	B	B	B	A	B	B	H	B	A	A	B
Kukri_c5497_312	2B	65.4114	38914290	A	A	B	A	B	A	A	A	B	A	B	A	B	A	B	B	A	A	A	B	B	A	B	A	B	B	A	B	B	A	A	B	A	B	A	B	B	B	A	B	B	H	B	A	A	B
TG0051	2B	65.4114		A	A	B	A	B	A	A	-	B	A	B	A	B	A	B	B	A	A	A	B	B	A	B	A	B	B	A	B	B	-	-	B	A	B	A	B	B	B	A	B	B	H	B	A	A	-
wsnp_Ex_c21092_30220342	2B	65.4114	58978466	A	A	B	A	B	A	A	A	B	A	B	A	B	A	B	B	A	A	A	B	B	A	B	A	B	B	A	B	B	A	A	B	A	B	A	B	B	B	A	B	B	H	B	A	A	B
BS00010055_51	2B	68.5405	72610551	A	A	B	A	B	A	A	-	B	A	B	A	B	A	B	B	A	A	A	B	B	A	B	A	B	B	A	A	B	A	A	B	A	B	A	B	B	B	A	B	A	H	B	A	A	B
BS00110490_51	2B	68.5405	77170646	A	A	B	A	B	A	A	B	B	A	B	A	B	A	B	B	A	A	A	B	B	A	B	A	B	B	A	A	B	A	A	B	A	B	A	B	B	B	A	B	A	H	B	A	A	B
Excalibur_c7136_1260	2B	68.5405	77781683	A	A	B	A	B	A	A	H	B	A	B	A	B	A	B	B	A	A	A	B	B	A	B	A	B	B	A	A	B	A	A	B	A	B	A	B	B	B	A	B	A	H	B	A	A	B
GENE-0581_156	2B	68.5405	49881785	A	A	B	A	B	A	A	A	B	A	B	A	B	A	B	B	A	A	A	B	B	A	B	A	B	B	A	A	B	A	A	B	A	B	A	B	B	B	A	B	A	H	B	A	A	B
IAAV8040	2B	68.5405	77174828	A	A	B	A	B	A	A	H	B	A	B	A	B	A	B	B	A	A	A	B	B	A	B	A	B	B	A	A	B	A	A	B	A	B	A	B	B	B	A	B	A	H	B	A	A	B
RAC875_c46516_443	2B	68.5405	77174105	A	A	B	A	B	A	A	B	B	A	B	A	B	A	B	B	A	A	A	B	B	A	B	A	B	B	A	A	B	A	A	B	A	B	A	B	B	B	A	B	A	A	B	A	A	B
wsnp_JD_c3732_4781170	2B	68.5405		A	A	B	A	B	A	A	-	B	A	B	A	B	A	B	B	A	A	A	B	B	A	B	A	B	B	A	A	B	A	A	B	A	B	A	B	B	B	A	B	A	H	B	A	A	B
wsnp_Ku_c31_62657	2B	68.5405		A	A	B	A	B	A	A	H	B	A	B	A	B	A	B	B	A	A	A	B	B	A	B	A	B	B	A	A	B	A	A	B	A	B	A	B	B	B	A	B	A	-	B	A	A	B
RAC875_c86069_65	2B	70.8148		B	A	B	A	B	A	A	A	B	A	B	A	B	A	B	B	A	A	A	B	B	A	B	A	B	B	A	A	B	A	A	B	A	B	A	B	B	B	A	B	A	H	B	A	A	B
BS00022422_51	2B	71.3766	89491655	B	A	B	A	B	A	A	A	B	A	B	A	B	A	H	B	A	A	A	B	B	A	B	A	B	B	A	A	B	A	A	B	A	B	A	B	B	B	A	B	A	H	B	A	A	B
Excalibur_rep_c68899_1400	2B	71.3766	91836588	B	A	B	A	B	A	A	A	B	A	B	A	B	A	H	B	A	A	A	B	B	A	B	A	B	B	A	A	B	A	A	B	A	B	A	B	B	B	A	B	A	H	B	A	A	B
GENE-1741_103	2B	71.3766	58655424	B	A	B	A	B	A	A	A	B	A	B	A	B	A	H	B	A	A	A	B	B	A	B	A	B	B	A	A	B	A	A	B	A	B	A	B	B	B	A	B	A	-	B	A	A	B
IACX6239	2B	71.3766	59008004	B	A	B	A	B	A	A	A	B	A	B	A	B	A	A	B	A	A	A	B	B	A	B	A	B	B	A	A	B	A	A	B	A	B	A	B	B	B	A	B	A	-	B	A	A	B
Kukri_c4710_991	2B	71.3766	58005486	B	A	B	A	B	A	A	A	B	A	B	A	B	A	H	B	A	A	A	B	B	A	B	A	B	B	A	A	B	A	A	B	A	B	A	B	B	B	A	B	A	H	B	A	A	B
RAC875_c41476_217	2B	71.3766		B	A	B	A	B	A	A	A	B	A	B	A	B	A	-	B	A	A	A	B	B	A	B	A	B	B	A	A	B	A	A	B	A	B	A	B	B	B	A	B	A	A	B	A	A	B
BobWhite_c30622_180	2B	71.9448	129303374	B	A	B	A	B	A	A	A	B	A	B	A	B	A	H	B	A	A	A	B	B	A	B	A	B	B	A	A	B	B	H	B	A	B	A	B	B	B	A	B	A	H	B	A	A	B
BS00038217_51	2B	71.9448	99961084	B	A	B	A	B	A	A	A	B	A	B	A	B	A	H	B	A	A	A	B	B	A	B	A	B	B	A	A	B	B	H	B	A	B	A	B	B	B	A	B	A	H	B	A	A	B
BS00038218_51	2B	71.9448	99961088	B	A	B	A	B	A	A	A	B	A	B	A	B	A	H	B	A	A	A	B	B	A	B	A	B	B	A	A	B	B	H	B	A	B	A	B	B	B	A	B	A	H	B	A	A	B
BS00043099_51	2B	71.9448	99756510	B	A	B	A	B	A	A	A	B	A	B	A	B	A	H	B	A	A	A	B	B	A	B	A	B	B	A	A	B	B	H	B	A	B	A	B	B	B	A	B	A	H	B	A	A	B
BS00067337_51	2B	71.9448	97188902	B	A	B	A	B	A	A	A	B	A	B	A	B	A	H	B	A	A	A	B	B	A	B	A	B	B	A	A	B	B	H	B	A	B	A	B	B	B	A	B	A	H	B	A	A	B
BS00079213_51	2B	71.9448	104237413	B	A	B	A	B	A	A	A	B	A	B	A	B	A	H	B	A	A	A	B	B	A	B	A	B	B	A	A	B	B	H	B	A	B	A	B	B	B	A	B	A	H	B	-	-	B
BS00103461_51	2B	71.9448	104580548	B	A	B	A	B	A	A	A	B	A	B	A	B	A	H	B	A	A	A	B	B	A	B	A	B	B	A	A	B	B	H	B	A	B	A	B	B	B	A	B	A	H	B	A	A	B
CAP7_c1018_75	2B	71.9448	97442031	B	A	B	A	B	A	A	A	B	A	B	A	B	A	H	B	A	A	A	B	B	A	B	A	B	B	A	A	B	B	H	B	A	B	A	B	B	B	A	B	A	H	B	A	A	B
Excalibur_c25430_183	2B	71.9448	104063845	B	A	B	A	B	A	A	A	B	A	B	A	B	A	H	B	A	A	A	B	B	A	B	A	B	B	A	A	B	B	H	B	A	B	A	B	B	B	A	B	A	H	B	A	A	B
Excalibur_c43482_141	2B	71.9448		B	A	B	A	B	A	A	A	B	A	B	A	B	A	A	B	A	A	A	B	B	A	B	A	B	B	A	A	B	B	-	B	A	B	A	B	B	B	A	B	A	-	B	A	A	B
IACX6223	2B	71.9448	93409767	B	A	B	A	B	A	A	A	B	A	B	A	B	A	H	B	A	A	A	B	B	A	B	A	B	B	A	A	B	B	H	B	A	B	A	B	B	B	A	B	A	H	B	A	A	B
Kukri_c36879_83	2B	71.9448	95761959	B	A	B	A	B	A	A	A	B	A	B	A	B	A	H	B	A	A	A	B	B	A	B	A	B	B	A	A	B	B	H	B	A	B	A	B	B	B	A	B	A	H	B	A	A	B
RAC875_c11609_62	2B	71.9448	67231162	B	A	B	A	-	A	A	A	B	A	B	A	B	A	H	B	A	A	A	B	B	A	B	A	B	B	A	A	B	B	H	B	A	B	A	B	B	B	A	B	A	H	B	A	A	B
RAC875_c26415_350	2B	71.9448	98298288	B	A	B	A	B	A	A	A	B	A	B	A	B	A	H	B	A	A	A	B	B	A	B	A	B	B	A	A	B	B	H	B	A	B	A	B	B	B	A	B	A	H	B	A	A	B
RAC875_c3302_1411	2B	71.9448	102977102	B	A	B	A	B	A	A	A	B	A	B	A	B	A	H	B	A	A	A	B	B	A	B	A	B	B	A	A	B	B	H	B	A	B	A	B	B	B	A	B	A	H	B	A	A	B
RAC875_c37837_889	2B	71.9448	94223974	B	A	B	A	B	A	A	A	B	A	B	A	B	A	H	B	A	A	A	B	B	A	B	A	B	B	A	A	B	B	H	B	A	B	A	B	B	B	A	B	A	H	B	A	A	B
RAC875_c76533_442	2B	71.9448	98360670	B	A	B	A	B	A	A	A	B	A	B	A	B	A	H	B	A	A	A	B	B	A	B	A	B	B	A	A	B	B	H	B	A	B	A	B	B	B	A	B	A	H	B	A	A	B
RFL_Contig2231_346	2B	71.9448	104574455	B	A	B	A	B	A	A	A	B	A	B	A	B	A	H	B	A	A	A	B	B	A	B	A	B	B	A	A	B	B	H	B	A	B	A	B	B	B	A	B	A	H	B	A	A	B
Tdurum_contig1653_190	2B	71.9448		B	A	B	A	B	A	A	A	B	A	B	A	B	A	H	B	A	A	A	B	B	A	B	A	B	B	A	A	B	B	H	B	A	B	A	B	B	B	A	B	A	H	B	A	A	B
Tdurum_contig59780_988	2B	71.9448	98365757	B	A	B	A	B	A	A	-	B	A	B	A	B	A	H	B	A	A	A	B	B	A	B	A	B	B	A	A	B	B	H	B	A	B	A	B	B	B	A	B	A	H	B	A	A	B
Tdurum_contig62852_302	2B	71.9448	104062890	B	A	B	A	B	A	A	A	B	A	B	A	B	A	H	B	A	A	A	B	B	A	B	A	B	B	A	A	B	B	H	B	A	B	A	B	B	B	A	B	A	H	B	A	A	B
Tdurum_contig62852_538	2B	71.9448	104063791	B	A	B	A	B	A	A	A	B	A	B	A	B	A	-	B	A	A	A	B	B	A	B	A	B	B	A	A	B	B	-	B	A	B	A	B	B	B	A	B	A	-	B	A	A	B
Tdurum_contig68806_677	2B	71.9448	104577595	B	A	B	A	B	A	A	-	B	A	B	A	B	A	-	B	A	A	A	B	B	A	B	A	B	B	A	A	B	B	-	B	A	B	A	B	B	B	A	B	A	-	B	A	A	B
tplb0045o20_1168	2B	71.9448		B	A	B	A	B	A	A	A	B	A	B	A	B	A	H	B	A	A	A	B	B	A	B	A	B	B	A	A	B	B	H	B	A	B	A	B	B	B	A	B	A	H	B	A	A	B
tplb0045o20_699	2B	71.9448	99765448	B	A	B	A	B	A	A	A	B	A	B	A	B	A	H	B	A	A	A	B	B	A	B	A	B	B	A	A	B	B	H	B	A	B	A	B	B	B	A	B	A	H	B	A	A	B
wsnp_Ex_c5239_9272511	2B	71.9448	102977549	B	A	B	A	B	A	A	A	B	A	B	A	B	A	H	B	A	A	A	B	B	A	B	A	B	B	A	A	B	B	H	B	A	B	A	B	B	B	A	B	A	H	B	A	A	B
wsnp_Ex_c741_1456698	2B	71.9448		B	A	B	A	B	A	A	A	B	A	B	A	B	A	H	B	A	A	A	B	B	A	B	A	B	B	A	A	B	B	H	B	A	B	A	B	B	B	A	B	A	H	B	A	A	B
wsnp_JD_c12687_12877994	2B	71.9448	99759678	B	A	B	A	B	A	A	A	B	A	B	A	B	A	H	B	A	A	A	B	B	A	B	A	B	B	A	A	B	B	H	B	A	B	A	B	B	B	A	B	A	H	B	A	A	B
wsnp_JD_c6350_7516597	2B	74.8894	128456741	B	A	B	A	B	A	A	A	B	A	B	A	B	A	A	B	A	A	A	B	B	A	B	B	B	B	A	A	B	B	-	B	A	B	A	B	B	B	A	B	A	A	B	B	A	B
BS00041323_51	2B	76.5946	180543442	B	A	B	A	B	A	A	A	B	A	B	A	B	A	B	B	A	A	A	B	B	A	B	B	B	B	A	A	B	B	B	B	A	B	A	B	B	B	A	B	A	B	B	B	A	B
Ra_c4397_542	2B	77.1441	157694647	B	A	B	A	B	A	A	A	B	A	B	A	B	A	B	B	A	A	A	B	B	A	B	B	B	B	A	A	B	B	B	B	B	B	A	B	B	B	A	B	A	B	B	B	A	B
RAC875_c1226_652	2B	77.1441	157693584	B	A	B	A	B	A	A	A	B	A	B	A	B	A	-	B	A	A	A	B	B	A	B	B	B	B	A	A	B	B	-	B	B	B	A	B	B	B	A	B	A	B	B	B	A	B
BS00043103_51	2B	77.6996	183200569	B	A	B	A	B	A	A	A	B	A	B	A	B	A	H	B	A	A	A	B	B	A	B	B	B	B	A	A	B	B	H	B	H	B	A	B	B	B	A	B	A	H	B	B	A	B
IAAV5331	2B	77.6996		B	A	B	A	B	A	A	A	B	A	B	A	B	A	H	B	A	A	A	B	B	A	B	B	B	B	A	A	B	B	H	B	H	B	A	B	B	B	A	B	A	H	B	B	A	B
Kukri_rep_c94009_116	2B	77.6996	182361037	B	A	B	A	B	A	A	A	B	A	B	A	B	A	H	B	A	A	A	B	B	A	B	B	B	B	A	A	B	B	H	B	H	B	A	B	B	B	A	B	A	H	B	B	A	B
TA001322-1176	2B	77.6996		B	A	B	A	B	A	A	A	B	A	B	A	B	A	H	B	A	A	A	B	B	A	B	B	B	B	A	A	B	B	H	B	H	B	A	B	B	B	A	B	A	H	B	B	A	B
wsnp_Ex_c3764_6853627	2B	77.6996	185761189	B	A	B	A	B	A	A	A	B	A	B	A	B	A	B	B	A	A	A	B	B	A	B	B	B	B	A	A	B	B	B	B	B	B	A	B	B	B	A	B	A	B	B	B	A	B
wsnp_Ex_rep_c101906_87187119	2B	77.6996	182012095	B	A	B	A	B	A	A	A	B	A	B	A	B	A	H	B	A	A	A	B	B	A	B	B	B	B	A	A	B	B	H	B	H	B	A	B	B	B	A	B	A	H	B	B	A	B
BobWhite_c7786_376	2B	78.281		B	A	B	A	B	A	A	A	B	A	B	A	B	A	H	B	A	A	A	B	B	A	B	B	B	B	A	A	B	B	H	B	H	B	A	B	B	B	A	B	A	H	B	B	A	B
BobWhite_c948_52	2B	78.281		B	A	B	A	B	A	A	A	B	A	B	A	B	A	H	B	A	A	A	B	B	A	B	B	B	B	A	A	B	B	H	B	H	B	A	B	B	B	A	B	A	H	B	B	A	B
BS00011039_51	2B	78.281	126971870	B	A	B	A	B	A	A	A	B	A	B	A	B	A	H	B	A	A	A	B	B	A	B	B	B	B	A	A	B	B	H	B	H	B	A	B	B	B	A	B	A	H	B	B	A	B
BS00031814_51	2B	78.281	167798344	B	A	B	A	B	A	A	A	B	A	B	A	B	A	H	B	A	A	A	B	B	A	B	B	B	B	A	A	B	B	H	B	H	B	A	B	B	B	A	B	A	H	B	B	A	B
BS00035894_51	2B	78.281	164107334	B	A	B	A	B	A	A	A	B	A	B	A	B	A	H	B	A	A	A	B	B	A	B	B	B	B	A	A	B	B	H	B	H	B	A	B	B	B	A	B	A	H	B	B	A	B
BS00041921_51	2B	78.281	162928030	B	A	B	A	B	A	A	A	B	A	B	A	B	A	H	B	A	A	A	B	B	A	B	B	B	B	A	A	B	B	H	B	H	B	A	B	B	B	A	B	A	H	B	B	A	B
BS00070091_51	2B	78.281	163714341	B	A	B	A	B	A	A	A	B	A	B	A	B	A	H	B	A	A	A	B	B	A	B	B	B	B	A	A	B	B	H	B	H	B	A	B	-	B	A	B	A	H	B	B	A	B
Excalibur_c23723_141	2B	78.281	161409259	B	A	B	A	B	A	A	H	B	A	B	A	B	A	H	B	A	A	A	B	B	A	B	B	B	B	A	A	B	B	H	B	H	B	A	B	B	B	A	B	A	H	B	B	A	B
Excalibur_c46143_143	2B	78.281		B	A	B	A	B	A	A	A	B	A	B	A	B	A	H	B	A	A	A	B	B	A	B	B	B	B	A	A	B	B	H	B	H	B	A	B	B	B	A	B	A	H	B	B	A	B
IAAV4434	2B	78.281	151643468	B	A	B	A	B	A	A	A	B	A	B	A	B	A	H	B	A	A	A	B	B	A	B	B	B	B	A	A	B	B	-	B	-	B	A	B	B	B	A	B	A	-	B	B	A	B
IAAV539	2B	78.281	97842216	B	A	B	A	B	A	A	A	B	A	B	A	B	A	H	B	A	A	A	B	B	A	B	B	B	B	A	A	B	B	H	B	H	B	A	B	B	B	A	B	A	H	B	B	A	B
IAAV6156	2B	78.281		B	A	B	A	B	A	A	A	B	A	B	A	B	A	H	B	A	A	A	B	B	A	B	B	B	B	A	A	B	B	H	B	H	B	A	B	B	B	A	B	A	H	B	B	A	B
IAAV7129	2B	78.281	98268204	B	A	B	A	B	A	A	A	B	A	B	A	B	A	H	B	A	A	A	B	B	A	B	B	B	B	A	A	B	B	H	B	H	B	A	B	B	B	A	B	A	H	B	B	A	B
Kukri_c34353_821	2B	78.281		B	A	B	A	B	A	A	-	B	A	B	A	B	A	H	B	A	A	A	B	B	A	B	B	B	B	A	A	B	B	H	B	H	B	A	B	B	B	A	B	A	H	B	B	A	B
Kukri_c42244_809	2B	78.281	174930204	B	A	B	A	B	A	A	A	B	A	B	A	B	A	H	B	A	A	A	B	B	A	B	B	B	B	A	A	B	B	H	B	H	B	A	B	B	B	A	B	A	H	B	B	A	B
Kukri_c53629_239	2B	78.281	168610742	B	A	B	A	B	A	A	A	B	A	B	A	B	A	-	B	A	A	A	B	B	A	B	B	B	B	A	A	B	B	-	B	H	B	A	B	B	B	A	B	A	-	B	B	A	B
Kukri_c6973_344	2B	78.281	154251253	B	A	B	A	B	A	A	A	B	A	B	A	B	A	H	B	A	A	A	B	B	A	B	B	B	B	A	A	B	B	H	B	H	B	A	B	B	B	A	B	A	H	B	B	A	B
RAC875_c19210_348	2B	78.281		B	A	B	A	B	A	A	A	B	A	B	A	B	A	H	B	A	A	A	B	B	A	B	B	B	B	A	A	B	B	H	B	H	B	A	B	B	B	A	B	A	H	B	B	A	B
RAC875_c47353_350	2B	78.281	153859877	B	A	B	A	B	A	A	A	B	A	B	A	B	A	H	B	A	A	A	B	B	A	B	B	B	B	A	A	B	B	H	B	H	B	A	B	B	B	A	B	A	H	B	B	A	B
RAC875_c50245_120	2B	78.281	127208704	B	A	B	A	B	A	A	A	B	A	B	A	B	A	H	B	A	A	A	B	B	A	B	B	B	B	A	A	B	B	H	B	H	B	A	B	B	B	A	B	A	H	B	B	A	B
RAC875_c7827_218	2B	78.281		B	A	B	A	B	A	A	-	B	A	B	A	B	A	H	B	A	A	A	B	B	A	B	B	B	B	A	A	B	B	H	B	H	B	A	B	B	B	A	B	A	H	B	B	A	B
RFL_Contig1483_1765	2B	78.281	151644876	B	A	B	A	B	A	A	A	B	A	B	A	B	A	H	B	A	A	A	B	B	A	B	B	B	B	A	A	B	B	H	B	H	B	A	B	B	B	A	B	A	H	B	B	A	B
RFL_Contig189_894	2B	78.281		B	A	B	A	B	A	A	A	B	A	B	A	B	A	H	B	A	A	A	B	B	A	B	B	B	B	A	A	B	B	H	B	H	B	A	B	B	B	A	B	A	H	B	B	A	B
TA005635-0459	2B	78.281	161406179	B	A	B	A	B	A	A	A	B	A	B	A	B	A	H	B	A	A	A	B	B	A	B	B	B	B	A	A	B	B	H	B	H	B	A	B	B	B	A	B	A	H	B	B	A	B
Tdurum_contig71387_65	2B	78.281	152175265	B	A	B	A	B	A	A	A	B	A	B	A	B	A	-	B	A	A	A	B	B	A	B	B	B	B	A	A	B	B	-	B	-	B	A	B	B	B	A	B	A	-	B	B	A	B
tplb0031k24_254	2B	78.281	153227086	B	A	B	A	B	A	A	A	B	A	B	A	B	A	H	B	A	A	A	B	B	A	B	B	B	B	A	A	B	B	H	B	H	B	A	B	B	B	A	B	A	H	B	B	A	B
wsnp_CAP11_rep_c9018_3888047	2B	78.281	165115459	B	A	B	A	B	A	A	A	B	A	B	A	B	A	H	B	A	A	A	B	B	A	B	B	B	B	A	A	B	B	H	B	H	B	A	B	B	B	A	B	A	H	B	B	A	B
wsnp_Ex_c13351_21042379	2B	78.281	150707767	B	A	B	A	B	A	A	A	B	A	B	A	B	A	H	B	A	A	A	B	B	A	B	B	B	B	A	A	B	B	H	B	H	B	A	B	B	B	A	B	A	H	B	B	A	B
wsnp_Ex_c22018_31193171	2B	78.281	164088649	B	A	B	A	B	A	A	A	B	A	B	A	B	A	H	B	A	A	A	B	B	A	B	B	B	B	A	A	B	B	H	B	H	B	A	B	B	B	A	B	A	H	B	B	A	B
wsnp_Ex_c3044_5620102	2B	78.281	166472440	B	A	B	A	B	A	A	H	B	A	B	A	B	A	H	B	A	A	A	B	B	A	B	B	B	B	A	A	B	B	H	B	H	B	A	B	B	B	A	B	A	H	B	B	A	B
wsnp_Ex_c51461_55394646	2B	78.281	177649957	B	A	B	A	B	A	A	A	B	A	B	A	B	A	H	B	A	A	A	B	B	A	B	B	B	B	A	A	B	B	H	B	H	B	A	B	B	B	A	B	A	H	B	B	A	B
wsnp_Ex_c62844_62315607	2B	78.281	164939927	B	A	B	A	B	A	A	A	B	A	B	A	B	A	H	B	A	A	A	B	B	A	B	B	B	B	A	A	B	B	H	B	H	B	A	B	B	B	A	B	A	H	B	B	A	B
wsnp_JD_c1236_1789566	2B	78.281	124874207	B	A	B	A	B	A	A	H	B	A	B	A	B	A	H	B	A	A	A	B	B	A	B	B	B	B	A	A	B	B	H	B	H	B	A	B	B	B	A	B	A	H	B	B	A	B
wsnp_JD_c4699_5834958	2B	78.281	176706026	B	A	B	A	B	A	A	-	B	A	B	A	B	A	H	B	A	A	A	B	B	A	B	B	B	B	A	A	B	B	H	B	H	B	A	B	B	B	A	B	A	H	B	B	A	B
wsnp_Ku_c13905_22034406	2B	78.281	153223758	B	A	B	A	B	A	A	A	B	A	B	A	B	A	H	B	A	A	A	B	B	A	B	B	B	B	A	A	B	B	H	B	H	B	A	B	B	B	A	B	A	H	B	B	A	B
wsnp_Ra_c16822_25566950	2B	78.281	153762119	B	A	B	A	B	A	A	A	B	A	B	A	B	A	H	B	A	A	A	B	B	A	B	B	B	B	A	A	B	B	H	B	H	B	A	B	B	B	A	B	A	H	B	B	A	B
RAC875_c32503_134	2B	78.2811	167469340	B	A	B	A	B	A	A	A	B	A	B	A	B	A	H	B	A	A	A	B	B	A	B	B	B	B	A	A	B	B	H	B	H	B	A	B	B	B	A	B	A	H	B	B	A	B
Excalibur_rep_c107558_367	2B	78.8624	133752263	B	A	B	A	B	A	A	A	B	A	B	A	B	A	H	B	A	A	A	B	B	A	B	B	B	B	A	A	B	B	H	B	H	B	A	B	B	B	A	B	A	H	B	B	A	B
wsnp_Ex_rep_c102216_87433489	2B	78.8624	189619966	B	A	B	A	B	A	A	A	B	A	B	A	B	A	H	B	A	A	A	B	B	A	B	B	B	B	A	A	B	B	H	B	H	B	A	B	B	B	A	B	A	H	B	B	A	B
wsnp_Ex_rep_c106085_90293854	2B	78.8624	189594754	B	A	B	A	B	A	A	A	B	A	B	A	B	A	H	B	A	A	A	B	B	A	B	B	B	B	A	A	B	B	H	B	H	B	A	B	B	B	A	B	A	H	B	B	A	B
wsnp_Ku_c2725_5163091	2B	78.8624	189617131	B	A	B	A	B	A	A	-	B	A	B	A	B	A	H	B	A	A	A	B	B	A	B	B	B	B	A	A	B	B	H	B	H	B	A	B	B	B	A	B	A	H	B	B	A	B
wsnp_Ra_c46023_52004149	2B	78.8624	189619259	B	A	B	A	B	A	A	A	B	A	B	A	B	A	H	B	A	A	A	B	B	A	B	B	B	B	A	A	B	B	H	B	H	B	A	B	B	B	A	B	A	H	B	B	A	B
Ex_c8832_2521	2B	78.8625	190015995	B	A	B	A	B	A	A	H	B	A	B	A	B	A	H	B	A	A	A	B	B	A	B	B	B	B	A	A	B	B	H	B	H	B	A	B	B	B	A	B	A	H	B	B	A	B
RFL_Contig5290_1493	2B	79.4306	200385482	B	A	B	A	B	A	A	A	B	A	B	A	B	A	H	B	A	A	A	B	B	A	B	B	B	B	A	B	B	B	H	B	B	B	A	B	B	B	A	B	A	H	B	B	A	B
wsnp_CAP8_c1240_753371	2B	79.4306	201769241	B	A	B	A	B	A	A	A	B	A	B	A	B	A	H	B	A	A	A	B	B	A	B	B	B	B	A	B	B	B	H	B	B	B	A	B	B	B	A	B	A	H	B	B	A	B
RAC875_c8045_231	2B	79.4307	199763074	B	A	B	A	B	A	A	A	B	A	B	A	B	A	H	B	A	A	A	B	B	A	B	B	B	B	A	B	B	B	H	B	B	B	A	B	B	B	A	B	A	H	B	B	A	B
BobWhite_c5852_103	2B	80.5802	234636794	B	A	B	A	B	A	A	A	B	A	B	A	B	A	H	B	A	A	A	B	B	A	B	B	B	B	A	B	B	B	H	B	B	B	A	B	B	B	A	B	A	H	B	B	A	B
BobWhite_c5852_685	2B	80.5802	234636215	B	A	B	A	B	A	A	A	B	A	B	A	B	A	H	B	A	A	A	B	B	A	B	B	B	B	A	B	B	B	H	B	B	B	A	B	B	B	A	B	A	H	B	B	A	B
BobWhite_rep_c61602_139	2B	80.5802	237967261	B	A	B	A	B	A	A	A	B	A	B	A	B	A	H	B	A	A	A	B	B	A	B	B	B	B	A	B	B	B	H	B	B	B	A	B	B	B	A	B	A	H	B	B	A	B
BS00037345_51	2B	80.5802	144444030	B	A	B	A	B	A	A	A	B	A	B	A	B	A	H	B	A	A	A	B	B	A	B	B	B	B	A	B	B	B	H	B	B	B	A	B	B	B	A	B	A	H	B	B	A	B
BS00066119_51	2B	80.5802		B	A	B	A	B	A	A	A	B	A	B	A	B	A	-	B	A	A	A	B	B	A	B	B	B	B	A	B	B	B	-	B	B	B	A	B	B	B	A	B	A	H	B	B	A	B
BS00075410_51	2B	80.5802	245129264	B	A	B	A	B	A	A	A	B	A	B	A	B	A	H	B	A	A	A	B	B	A	B	B	B	B	A	B	B	B	H	B	B	B	A	B	B	B	A	B	A	H	B	B	A	B
CAP12_c2565_239	2B	80.5802	243790172	B	A	B	A	B	A	A	A	B	A	B	A	B	A	H	B	A	A	A	B	B	A	B	B	B	B	A	B	B	B	H	B	B	B	A	B	B	B	A	B	A	H	B	B	A	B
CAP7_c3814_303	2B	80.5802		B	A	B	A	B	A	A	A	B	A	B	A	B	A	-	B	A	A	A	B	B	A	B	B	B	B	A	B	B	B	H	B	B	B	A	B	B	B	A	B	A	H	B	B	A	B
Excalibur_c15696_1280	2B	80.5802	202740028	B	A	B	A	B	A	A	A	B	A	B	A	B	A	H	B	A	A	A	B	B	A	B	B	B	B	A	B	B	B	H	B	B	B	A	B	B	B	A	B	A	H	B	B	A	B
Excalibur_c18417_285	2B	80.5802	194472892	B	A	B	A	B	A	A	A	B	A	B	A	B	A	H	B	A	A	A	B	B	A	B	B	B	B	A	B	B	B	H	B	B	B	A	B	B	B	A	B	A	H	B	B	A	B
Excalibur_c20647_643	2B	80.5802		B	A	B	A	B	A	A	A	B	A	B	A	B	A	H	B	A	A	A	B	B	A	B	B	B	B	A	B	B	B	H	B	B	B	A	B	B	B	A	B	A	H	B	B	A	B
Excalibur_c25921_230	2B	80.5802	237583579	B	A	B	A	B	A	A	A	B	A	B	A	B	A	H	B	A	A	A	B	B	A	B	B	B	B	A	B	B	B	H	B	B	B	A	B	B	B	A	B	A	H	B	B	A	B
Excalibur_c584_726	2B	80.5802	245888218	B	A	B	A	B	A	A	A	B	A	B	A	B	A	H	B	A	A	A	B	B	A	B	B	B	B	A	B	B	B	H	B	B	B	A	B	B	B	A	B	A	H	B	B	A	B
Excalibur_c58566_284	2B	80.5802	233554407	B	A	B	A	B	A	A	A	B	A	B	A	B	A	H	B	A	A	A	B	B	A	B	B	B	B	A	B	B	B	H	B	B	B	A	B	B	B	A	B	A	H	B	B	A	B
GENE-0968_155	2B	80.5802		B	A	B	A	B	A	A	A	B	A	B	A	B	A	H	B	A	A	A	B	B	A	B	B	B	B	A	B	B	B	H	B	B	B	A	B	B	B	A	B	A	H	B	B	A	B
Kukri_c26474_540	2B	80.5802	245790742	B	A	B	A	B	A	A	A	B	A	B	A	B	A	H	B	A	A	A	B	B	A	B	B	B	B	A	B	B	B	H	B	B	B	A	B	B	B	A	B	A	H	B	B	A	B
Kukri_c27532_148	2B	80.5802	316744021	B	A	B	A	B	A	A	A	B	A	B	A	B	A	H	B	A	A	A	B	B	A	B	B	B	B	A	B	B	B	H	B	B	B	A	B	B	B	A	B	A	-	B	B	A	B
Kukri_c32980_552	2B	80.5802		B	H	B	H	B	H	H	A	B	H	B	H	B	H	H	B	-	A	H	B	B	H	B	B	B	B	H	B	B	B	H	B	B	B	H	B	B	B	H	B	H	H	B	B	A	B
Kukri_c32980_680	2B	80.5802		B	H	B	H	B	H	H	A	B	H	B	H	B	H	-	B	-	A	H	B	B	H	B	B	B	B	H	B	B	B	H	B	B	B	H	B	B	B	H	B	H	H	B	B	A	B
Kukri_c48787_108	2B	80.5802		B	A	B	A	B	A	A	A	B	A	B	A	B	A	H	B	A	A	A	B	B	A	B	B	B	B	A	B	B	B	H	B	B	B	A	B	B	B	A	B	A	H	B	B	A	B
Kukri_c5711_112	2B	80.5802	234636098	B	A	B	A	B	A	A	A	B	A	B	A	B	A	H	B	A	A	A	B	B	A	B	B	B	B	A	B	B	B	H	B	B	B	A	B	B	B	A	B	A	H	B	B	A	B
RAC875_c30936_411	2B	80.5802	234634389	B	A	B	A	B	A	A	A	B	A	B	A	B	A	H	B	A	A	A	B	B	A	B	B	B	B	A	B	B	B	H	B	B	B	A	B	B	B	A	B	A	H	B	B	A	B
RAC875_c3752_890	2B	80.5802	210262587	B	A	B	A	B	A	A	A	B	A	B	A	B	A	H	B	A	A	A	B	B	A	B	B	B	B	A	B	B	B	H	B	B	B	A	B	B	B	A	B	A	H	B	B	A	B
RAC875_c4203_382	2B	80.5802	232348210	B	A	B	A	B	A	A	A	B	A	B	A	B	A	H	B	A	A	A	B	B	A	B	B	B	B	A	B	B	B	H	B	B	B	A	B	B	B	A	B	A	H	B	B	A	B
RAC875_c57938_94	2B	80.5802		B	A	B	A	B	A	A	A	B	A	B	A	B	A	H	B	A	A	A	B	B	A	B	B	B	B	A	B	B	B	-	B	B	B	A	B	B	B	A	B	A	H	B	B	A	B
RAC875_c63545_85	2B	80.5802	244572477	B	A	B	A	B	A	A	A	B	A	B	A	B	A	H	B	A	A	A	B	B	A	B	B	B	B	A	B	B	B	H	B	B	B	A	B	B	B	A	B	A	H	B	B	A	B
RAC875_rep_c109975_192	2B	80.5802	236805761	B	A	B	A	B	A	A	A	B	A	B	A	B	A	H	B	A	A	A	B	B	A	B	B	B	B	A	B	B	B	H	B	B	B	A	B	B	B	A	B	A	H	B	B	A	B
TA001505-1171	2B	80.5802		B	A	B	A	B	A	A	A	B	A	B	A	B	A	H	B	A	A	A	B	B	A	B	B	B	B	A	B	B	B	H	B	B	B	A	B	B	B	A	B	A	H	B	B	A	B
TA004199-0831	2B	80.5802		B	A	B	A	B	A	A	A	B	A	B	A	B	A	H	B	A	A	A	B	B	A	B	B	B	B	A	B	B	B	H	B	B	B	A	B	B	B	A	B	A	H	B	B	A	B
tplb0040e02_1293	2B	80.5802	240318304	B	A	B	A	B	A	A	A	B	A	B	A	B	A	H	B	A	A	A	B	B	A	B	B	B	B	A	B	B	B	-	B	B	B	A	B	B	B	A	B	A	H	B	B	A	B
wsnp_Ex_c7003_12065567	2B	80.5802	210259866	B	A	B	A	B	A	A	A	B	A	B	A	B	A	H	B	A	A	A	B	B	A	B	B	B	B	A	B	B	B	H	B	B	B	A	B	B	B	A	B	A	H	B	B	A	B
wsnp_Ex_c7003_12065828	2B	80.5802	210259511	B	A	B	A	B	A	A	A	B	A	B	A	B	A	H	B	A	A	A	B	B	A	B	B	B	B	A	B	B	B	H	B	B	B	A	B	B	B	A	B	A	H	B	B	A	B
wsnp_RFL_Contig3802_4108582	2B	80.5802	206854121	B	A	B	A	B	A	A	A	B	A	B	A	B	A	H	B	A	A	A	B	B	A	B	B	B	B	A	B	B	B	H	B	B	B	A	B	B	B	A	B	A	H	B	B	A	B
RAC875_s109189_188	2B	80.5803	248149824	B	A	B	A	B	A	A	H	B	A	B	A	B	A	H	B	A	A	A	B	B	A	B	B	B	B	A	B	B	B	H	B	B	B	A	B	B	B	A	B	A	H	B	B	A	B
Kukri_c9507_95	2B	81.1485		B	A	B	A	B	A	A	B	B	A	B	A	B	A	-	B	A	A	A	B	B	A	B	B	B	B	A	B	B	B	B	B	B	B	A	B	B	B	A	B	A	B	B	B	A	B
RAC875_c18463_156	2B	81.7103		B	A	B	A	B	A	A	A	B	A	B	A	B	A	B	B	A	A	A	B	B	A	B	B	B	B	A	B	B	B	-	B	B	B	A	B	B	B	A	B	A	-	B	B	A	B
Tdurum_contig91519_224	2B	82.2658	451809403	B	A	B	A	B	A	A	A	B	A	B	A	B	A	B	B	A	A	A	B	B	A	B	B	B	B	A	B	B	B	-	B	B	B	A	B	B	A	A	B	A	A	B	B	A	B
BobWhite_c10215_242	2B	82.8214	441079831	B	A	B	A	B	A	A	A	B	A	B	A	B	A	B	B	A	A	A	B	B	A	B	B	B	B	A	B	B	B	H	B	B	B	A	B	B	A	A	B	A	H	B	B	A	B
BobWhite_c3693_85	2B	82.8214	429261148	B	A	B	A	B	A	A	A	B	A	B	A	B	A	B	B	A	A	A	B	B	A	B	B	B	B	A	B	B	B	H	B	B	B	A	B	B	A	A	B	A	H	B	B	A	B
Excalibur_c33079_199	2B	82.8214	361396819	B	A	B	A	B	A	A	A	B	A	B	A	B	A	B	B	A	A	A	B	B	A	B	B	B	B	A	B	B	B	H	B	B	B	A	B	B	A	A	B	A	H	B	B	A	B
Excalibur_rep_c106537_63	2B	82.8214	424331287	B	A	B	A	B	A	A	A	B	A	B	A	B	A	B	B	A	A	A	B	B	A	B	B	B	B	A	B	B	B	H	B	B	B	A	B	B	A	A	B	A	H	B	B	A	B
Excalibur_rep_c107546_206	2B	82.8214	437008599	B	A	B	A	B	A	A	A	B	A	B	A	B	A	B	B	A	A	A	B	B	A	B	B	B	B	A	B	B	B	H	B	B	B	A	B	B	A	A	B	A	H	B	B	A	B
Excalibur_rep_c111672_114	2B	82.8214	423661778	B	A	B	A	B	A	A	A	B	A	B	A	B	A	B	B	A	A	A	B	B	A	B	B	B	B	A	B	B	B	H	B	B	B	A	B	B	A	A	B	A	H	B	B	A	B
IAAV8980	2B	82.8214		B	A	B	A	B	A	A	A	B	A	B	A	B	A	B	B	A	A	A	B	B	A	B	B	B	B	A	B	B	B	H	B	B	B	A	B	B	A	A	B	A	H	B	B	A	B
Ku_c14053_772	2B	82.8214	437009757	B	A	B	A	B	A	A	A	B	A	B	A	B	A	B	B	A	A	A	B	B	A	B	B	B	B	A	B	B	B	H	B	B	B	A	B	B	A	A	B	A	H	B	B	A	B
Kukri_c26645_254	2B	82.8214		B	A	B	A	B	A	A	A	B	A	B	A	B	A	B	B	A	A	A	B	B	A	B	B	B	B	A	B	B	B	H	B	B	B	A	B	B	A	A	B	A	H	B	B	A	B
RAC875_c60230_122	2B	82.8214	440825282	B	A	B	A	B	A	A	A	B	A	B	A	B	A	B	B	A	A	A	B	B	A	B	B	B	B	A	B	B	B	H	B	B	B	A	B	B	A	A	B	A	H	B	B	A	B
RAC875_c9122_395	2B	82.8214	429147181	B	A	B	A	B	A	A	A	B	A	B	A	B	A	B	B	A	A	A	B	B	A	B	B	B	B	A	B	B	B	-	B	B	B	A	B	B	A	A	B	A	H	B	B	A	B
tplb0034a02_1566	2B	82.8214	441078843	B	A	B	A	B	A	A	A	B	A	B	A	B	A	B	B	A	A	A	B	B	A	B	B	B	B	A	B	B	B	H	B	B	B	A	B	B	A	A	B	A	H	B	B	A	B
wsnp_CAP11_c307_255609	2B	82.8214	423904696	B	A	B	A	B	A	A	A	B	A	B	A	B	A	B	B	A	A	A	B	B	A	B	B	B	B	A	B	B	B	H	B	B	B	A	B	B	A	A	B	A	H	B	B	A	B
wsnp_Ex_c51661_55533018	2B	82.8214	432134960	B	A	B	A	B	A	A	A	B	A	B	A	B	A	B	B	A	A	A	B	B	A	B	B	B	B	A	B	B	B	H	B	B	B	A	B	B	A	A	B	A	H	B	B	A	B
wsnp_Ex_c52405_56014689	2B	82.8214	424332371	B	A	B	A	B	A	A	A	B	A	B	A	B	A	B	B	A	A	A	B	B	A	B	B	B	B	A	B	B	B	H	B	B	B	A	B	B	A	A	B	A	H	B	B	A	B
wsnp_Ex_c8641_14485630	2B	82.8214	433540161	B	A	B	A	B	A	A	A	B	A	B	A	B	A	B	B	A	A	A	B	B	A	B	B	B	B	A	B	B	B	H	B	B	B	A	B	B	A	A	B	A	H	B	B	A	B
wsnp_Ex_rep_c103248_88252209	2B	82.8214	423661778	B	A	B	A	B	A	A	A	B	A	B	A	B	A	B	B	A	A	A	B	B	A	B	B	B	B	A	B	B	B	H	B	B	B	A	B	B	A	A	B	A	H	B	B	A	B
wsnp_Ex_rep_c103248_88252281	2B	82.8214	423661850	B	A	B	A	B	A	A	A	B	A	B	A	B	A	B	B	A	A	A	B	B	A	B	B	B	B	A	B	B	B	-	B	B	B	A	B	B	A	A	B	A	-	B	B	A	B
wsnp_Ex_rep_c69928_68889568	2B	82.8214	355986868	B	A	B	A	B	A	A	A	B	A	B	A	B	A	B	B	A	A	A	B	B	A	B	B	B	B	A	B	B	B	H	B	B	B	A	B	B	A	A	B	A	H	B	B	A	B
wsnp_Ku_rep_c71678_71421327	2B	82.8214		B	A	B	A	B	A	A	A	B	A	B	A	B	A	B	B	A	A	A	B	B	A	B	B	B	B	A	B	B	B	H	B	B	B	A	B	B	A	A	B	A	H	B	B	A	B
wsnp_Ex_c20529_29608872	2B	83.4096	423663733	B	A	B	A	B	A	A	B	B	A	B	A	B	A	B	B	A	A	A	B	B	A	B	B	B	B	A	B	B	B	-	B	B	B	A	B	B	A	A	B	A	H	B	B	H	B
BobWhite_c1654_440	2B	83.4097	434691710	B	A	B	A	B	A	A	H	B	A	B	A	B	A	B	B	A	A	A	B	B	A	B	B	B	B	A	B	B	B	H	B	B	B	A	B	B	A	A	B	A	H	B	B	A	B
Kukri_c49219_76	2B	83.4097	368003112	B	A	B	A	B	A	A	H	B	A	B	A	B	A	B	B	A	A	A	B	B	A	B	B	B	B	A	B	B	B	H	B	B	B	A	B	B	A	A	B	A	H	B	B	A	B
Kukri_rep_c70962_1545	2B	83.4097	436961186	B	A	B	A	B	A	A	H	B	A	B	A	B	A	B	B	A	A	A	B	B	A	B	B	B	B	A	B	B	B	H	B	B	B	A	B	B	A	A	B	A	H	B	B	A	B
wsnp_Ex_rep_c108679_91802578	2B	83.9779	441866972	B	A	B	A	B	A	A	A	B	A	B	A	B	A	B	B	A	A	A	B	B	A	B	B	B	B	A	B	B	B	H	B	A	B	A	B	B	A	A	B	A	H	B	B	A	B
wsnp_Ex_rep_c66524_64799410	2B	83.9779	441860148	B	A	B	A	B	A	A	A	B	A	B	A	B	A	B	B	A	A	A	B	B	A	B	B	B	B	A	B	B	B	H	B	A	B	A	B	B	A	A	B	A	-	B	B	A	B
BobWhite_c16735_131	2B	84.5461	442569592	B	A	B	A	B	A	A	A	A	A	B	A	B	A	B	B	A	A	A	B	B	A	B	B	B	B	A	B	B	B	H	B	A	B	A	B	B	A	A	B	A	H	B	B	A	B
wsnp_JD_c9251_10121369	2B	84.5461	442796872	B	A	B	A	B	A	A	A	A	A	B	A	B	A	B	B	A	A	A	B	B	A	B	B	B	B	A	B	B	B	H	B	A	B	A	B	B	A	A	B	A	H	B	B	A	B
BobWhite_c14686_86	2B	85.1079	463771117	B	A	B	A	B	A	A	A	A	A	B	A	B	A	B	B	A	A	A	B	B	A	B	B	B	B	A	B	B	B	H	B	A	B	A	B	B	A	A	B	A	H	B	B	A	B
BobWhite_c31523_130	2B	85.1079	457343204	B	A	B	A	B	A	A	A	A	A	B	A	B	A	B	B	A	A	A	B	B	A	B	B	B	B	A	B	B	B	H	B	A	B	A	B	B	A	A	B	A	H	B	B	A	B
BobWhite_c34233_205	2B	85.1079	453272780	B	A	B	A	B	A	A	A	A	A	B	A	B	A	B	B	A	A	A	B	B	A	B	B	B	B	A	B	B	B	H	B	A	B	A	B	B	A	A	B	A	H	B	B	A	B
BobWhite_c40428_349	2B	85.1079		B	A	B	A	B	A	A	A	A	A	B	A	B	A	B	B	A	A	A	B	B	A	B	B	B	B	A	B	B	B	H	B	A	B	A	B	B	A	A	B	A	H	B	B	A	B
BobWhite_c46028_206	2B	85.1079		B	A	B	A	B	A	A	A	A	A	B	A	B	A	B	B	A	A	A	B	B	A	B	B	B	B	A	B	B	B	H	B	A	B	A	B	B	A	A	B	A	H	B	B	A	B
Ex_c10478_746	2B	85.1079	382176993	B	A	B	A	B	A	A	A	A	A	B	A	B	A	B	B	A	A	A	B	B	A	B	B	B	B	A	B	B	B	H	B	A	B	A	B	B	A	A	B	A	H	B	B	A	B
Excalibur_c18275_211	2B	85.1079	454326756	B	A	B	A	B	A	A	A	A	A	B	A	B	A	B	B	A	A	A	B	B	A	B	B	B	B	A	B	B	B	H	B	A	B	A	B	B	A	A	B	A	H	B	B	A	B
Kukri_c17062_618	2B	85.1079	391722753	B	A	B	A	B	A	A	A	A	A	B	A	B	A	B	B	A	A	A	B	B	A	B	B	B	B	A	B	B	B	H	B	A	B	A	B	B	A	A	B	A	-	B	B	A	B
Kukri_c57811_86	2B	85.1079	462947184	B	A	B	A	B	A	A	A	A	A	B	A	B	A	B	B	A	A	A	B	B	A	B	B	B	B	A	B	B	B	H	B	A	B	A	B	B	A	A	B	A	H	B	B	A	B
RAC875_c41224_72	2B	85.1079	461523481	B	A	B	A	B	A	A	A	A	A	B	A	B	A	B	B	A	A	A	B	B	A	B	B	B	B	A	B	B	B	H	B	A	B	A	B	B	A	A	B	A	H	B	B	A	B
RFL_Contig4849_702	2B	85.1079	464290407	B	A	B	A	B	A	A	A	A	A	B	A	B	A	B	B	A	A	A	B	B	A	B	B	B	B	A	B	B	B	H	B	A	B	A	B	B	A	A	B	A	H	B	B	A	B
TA002013-0438	2B	85.1079	458622067	B	A	B	A	B	A	A	A	A	A	B	A	B	A	B	B	A	A	A	B	B	A	B	B	B	B	A	B	B	B	H	B	A	B	A	B	B	A	A	B	A	H	B	B	A	B
wsnp_Ex_c15985_24399118	2B	85.1079	445683703	B	A	B	A	B	A	A	A	A	A	B	A	B	A	B	B	A	A	A	B	B	A	B	B	B	B	A	B	B	B	H	B	A	B	A	B	B	A	A	B	A	H	B	B	A	B
wsnp_Ex_c6471_11241582	2B	85.1079	461739390	B	A	B	A	B	A	A	A	A	A	B	A	B	A	B	B	A	A	A	B	B	A	B	B	B	B	A	B	B	B	H	B	A	B	A	B	B	A	A	B	A	H	B	B	A	B
wsnp_Ex_c65790_64067038	2B	85.1079	462887258	B	A	B	A	B	A	A	A	A	A	B	A	B	A	B	B	A	A	A	B	B	A	B	B	B	B	A	B	B	B	H	B	A	B	A	B	B	A	A	B	A	H	B	B	A	B
wsnp_JD_c29301_23358365	2B	85.1079	460823288	B	A	B	A	B	A	A	-	A	A	B	A	B	A	B	B	A	A	A	B	B	A	B	B	B	B	A	B	B	B	H	B	A	B	A	B	B	A	A	B	A	H	B	B	A	B
wsnp_Ku_c37269_46153087	2B	85.1079	449842049	B	A	B	A	B	A	A	A	A	A	B	A	B	A	B	B	A	A	A	B	B	A	B	B	B	B	A	B	B	B	H	B	A	B	A	B	B	A	A	B	A	H	B	B	A	B
wsnp_Ku_c58640_61287250	2B	85.1079	456176564	B	A	B	A	B	A	A	A	A	A	B	A	B	A	B	B	A	A	A	B	B	A	B	B	B	B	A	B	B	B	H	B	A	B	A	B	B	A	A	B	A	H	B	B	A	B
BobWhite_c9351_274	2B	85.6761	522835671	B	A	B	A	B	A	A	A	A	A	B	A	B	A	A	B	A	A	A	B	B	A	B	B	B	B	A	B	B	B	H	B	A	B	A	B	B	A	A	B	A	H	B	B	A	B
CAP11_c1476_128	2B	85.6761	543704833	B	A	B	A	B	A	A	A	A	A	B	A	B	A	A	B	A	A	A	B	B	A	B	B	B	B	A	B	B	B	H	B	A	B	A	B	B	A	A	B	A	H	B	B	A	B
IACX7505	2B	85.6761	546202095	B	A	B	A	B	A	A	A	A	A	B	A	B	A	A	B	A	A	A	B	B	A	B	B	B	B	A	B	B	B	H	B	A	B	A	B	B	A	A	B	A	H	B	B	A	B
Jagger_c6853_60	2B	85.6761	547058575	B	A	B	A	B	A	A	A	A	A	B	A	B	A	A	B	A	A	A	B	B	A	B	B	B	B	A	B	B	B	H	B	A	B	A	B	B	A	A	B	A	H	B	B	A	B
Ku_c6050_678	2B	85.6761		B	A	B	A	B	A	A	A	A	A	B	A	B	A	A	B	A	A	A	B	B	A	B	B	B	B	A	B	B	B	H	B	A	B	A	B	B	A	A	B	A	H	B	B	A	B
Ra_c111671_555	2B	85.6761	546202015	B	A	B	A	B	A	A	H	A	A	B	A	B	A	A	B	A	A	A	B	B	A	B	B	B	B	A	B	B	B	H	B	A	B	A	B	B	A	A	B	A	H	B	B	A	B
Ra_c15365_530	2B	85.6761		B	A	B	A	B	A	A	A	A	A	B	A	B	A	A	B	A	A	A	B	B	A	B	B	B	B	A	B	B	B	H	B	A	B	A	B	B	A	A	B	A	H	B	B	A	B
Ra_c9190_1384	2B	85.6761	529103765	B	A	B	A	B	A	A	A	A	A	B	A	B	A	A	B	A	A	A	B	B	A	B	B	B	B	A	B	B	B	H	B	A	B	A	B	B	A	A	B	A	H	B	B	A	B
RAC875_c29716_871	2B	85.6761	546203286	B	A	B	A	B	A	A	A	A	A	B	A	B	A	A	B	A	A	A	B	B	A	B	B	B	B	A	B	B	B	H	B	A	B	A	B	B	A	A	B	A	H	B	B	A	B
RAC875_c67311_429	2B	85.6761	545757311	B	A	B	A	B	A	A	A	A	A	B	A	B	A	A	B	A	A	A	B	B	A	B	B	B	B	A	B	B	B	-	B	A	B	A	B	B	A	A	B	A	H	B	B	A	B
Tdurum_contig12836_418	2B	85.6761	527874512	B	A	B	A	B	A	A	A	A	A	B	A	B	A	A	B	A	A	A	B	B	A	B	B	B	B	A	B	B	B	H	B	A	B	A	B	B	A	A	B	A	H	B	B	A	B
wsnp_Ex_c25217_34481787	2B	85.6761	542759443	B	A	B	A	B	A	A	A	A	A	B	A	B	A	A	B	A	A	A	B	B	A	B	B	B	B	A	B	B	B	H	B	A	B	A	B	B	A	A	B	A	H	B	B	A	B
wsnp_Ex_c41558_48356814	2B	85.6761	544765659	B	A	B	A	B	A	A	A	A	A	B	A	B	A	A	B	A	A	A	B	B	A	B	B	B	B	A	B	B	B	H	B	A	B	A	B	B	A	A	B	A	H	B	B	A	B
wsnp_Ex_c41558_48356869	2B	85.6761	544765714	B	A	B	A	B	A	A	A	A	A	B	A	B	A	A	B	A	A	A	B	B	A	B	B	B	B	A	B	B	B	H	B	A	B	A	B	B	A	A	B	A	H	B	B	A	B
wsnp_Ex_rep_c105129_89641882	2B	85.6761	444762467	B	A	B	A	B	A	A	H	A	A	B	A	B	A	A	B	A	A	A	B	B	A	B	B	B	B	A	B	B	B	H	B	A	B	A	B	B	A	A	B	A	H	B	B	A	B
Excalibur_rep_c67360_303	2B	86.2508	456173891	B	A	B	A	B	A	A	A	A	A	B	A	B	A	B	B	A	A	A	B	B	A	B	B	B	B	A	B	B	B	H	B	A	B	A	B	B	A	A	B	A	H	B	B	A	B
wsnp_BG608232B_Ta_2_2	2B	86.2508	467225366	B	A	B	A	B	A	A	A	A	A	B	A	B	A	B	B	A	A	A	B	B	A	B	B	B	B	A	B	B	B	H	B	A	B	A	B	B	A	A	B	A	H	B	B	A	B
Tdurum_contig30930_184	2B	89.2305		B	A	B	A	B	A	A	A	A	A	B	A	A	A	A	B	A	B	A	B	B	A	B	B	B	A	A	B	B	B	B	B	A	B	A	B	B	B	A	B	A	A	B	B	A	B
RAC875_c36614_344	2B	90.3418		B	A	B	A	B	A	A	A	A	A	B	A	A	A	A	B	A	B	B	B	A	A	B	B	B	A	A	B	B	B	B	B	A	B	A	B	B	B	A	B	A	A	B	B	-	B
wsnp_Ex_rep_c67543_66165372	2B	91.4784	593675130	B	A	B	A	B	A	A	A	A	A	B	A	A	A	A	B	A	B	A	B	B	A	B	B	B	A	A	B	B	B	B	B	A	B	A	B	B	B	A	B	A	-	B	B	H	B
BS00022800_51	2B	92.0402	595126655	B	A	B	-	B	A	A	A	A	A	B	A	H	A	A	B	A	B	A	B	B	A	B	B	B	A	A	B	B	B	B	B	A	B	A	B	B	B	A	B	A	H	B	B	H	B
BS00035335_51	2B	92.0402	591915666	B	A	B	A	B	A	A	A	A	A	B	A	H	A	A	B	A	B	A	B	B	A	B	B	B	A	A	B	B	B	B	B	A	B	A	B	B	B	A	B	A	H	B	B	H	B
BS00064448_51	2B	92.0402		B	A	B	A	B	A	A	A	A	A	B	A	H	A	A	B	A	B	A	B	B	A	B	B	B	A	A	B	B	B	B	B	A	B	A	B	B	B	A	B	A	H	B	B	H	B
BS00091068_51	2B	92.0402	593658737	B	A	B	A	B	A	A	A	A	A	B	A	H	A	A	B	A	B	A	B	B	A	B	B	B	A	A	B	B	B	B	B	A	B	A	B	B	B	A	B	A	H	B	B	H	B
BS00093992_51	2B	92.0402		B	A	B	A	B	A	A	A	A	A	B	A	H	A	A	B	A	B	A	B	B	A	B	B	B	A	A	B	B	B	B	B	A	B	A	B	B	B	A	B	A	H	B	B	H	B
Excalibur_rep_c66577_159	2B	92.0402	572591367	B	A	B	A	B	A	A	A	A	A	B	A	H	A	A	B	A	B	A	B	B	A	B	B	B	A	A	B	B	B	B	B	A	B	A	B	B	B	A	B	A	H	B	B	H	B
IAAV5350	2B	92.0402		B	A	B	A	B	A	A	A	A	A	B	A	H	A	A	B	A	B	A	B	B	A	B	B	B	A	A	B	B	B	B	B	A	B	A	B	B	B	A	B	A	H	B	B	H	B
IAAV717	2B	92.0402		B	A	B	A	B	A	A	A	A	A	B	A	H	A	A	B	A	B	A	B	B	A	B	B	B	A	A	B	B	B	B	B	A	B	A	B	B	B	A	B	A	H	B	B	H	B
Kukri_c19751_873	2B	92.0402	594172437	B	A	B	A	B	A	A	A	A	A	B	A	H	A	A	B	A	B	A	B	B	A	B	B	B	A	A	B	B	B	B	B	A	B	A	B	B	B	A	B	A	H	B	B	H	B
Kukri_c79815_483	2B	92.0402	589879943	B	A	B	A	B	A	A	A	A	A	B	A	-	A	A	B	A	B	A	B	B	A	B	B	B	A	A	B	B	B	B	B	A	B	A	B	B	B	A	B	A	-	B	B	-	B
RFL_Contig4856_71	2B	92.0402	586120536	B	A	B	A	B	A	A	A	A	A	B	A	H	A	A	B	A	B	A	B	B	A	B	B	B	A	A	B	B	B	B	B	A	B	A	B	B	B	A	B	A	H	B	B	H	B
wsnp_BE490267A_Ta_2_1	2B	92.0402	587247965	B	A	B	A	B	A	A	A	A	A	B	A	H	A	A	B	A	B	A	B	B	A	B	B	B	A	A	B	B	B	B	B	A	B	A	B	B	B	A	B	A	H	B	B	H	B
wsnp_Ex_c114_230248	2B	92.0402	580020456	B	A	B	A	B	A	A	A	A	A	B	A	H	A	A	B	A	B	A	B	B	A	B	B	B	A	A	B	B	B	B	B	A	B	A	B	B	B	A	B	A	H	B	B	H	B
wsnp_Ex_c7203_12370983	2B	92.0402	593658530	B	A	B	A	B	A	A	-	A	A	B	A	H	A	A	B	A	B	A	B	B	A	B	B	B	A	A	B	B	B	B	B	A	B	A	B	B	B	A	B	A	H	B	B	H	B
wsnp_JD_rep_c67103_42432235	2B	92.0402	578601422	B	A	B	A	B	A	A	A	A	A	B	A	B	A	A	B	A	B	A	B	B	A	B	B	B	A	A	B	B	B	B	B	A	B	A	B	B	B	A	B	A	H	B	B	H	B
BobWhite_c26981_66	2B	92.6149	563045881	B	A	B	A	B	A	A	A	A	A	B	A	H	A	A	B	A	B	A	B	B	A	B	B	B	B	A	B	B	B	B	B	A	B	A	B	B	B	A	B	A	H	B	B	B	B
wsnp_BE490763B_Ta_2_1	2B	92.6149	563859677	B	A	B	A	B	A	A	A	A	A	B	A	-	A	A	B	A	B	A	B	B	A	B	B	B	B	A	B	B	B	B	B	A	B	A	B	B	B	A	B	A	-	B	B	B	B
wsnp_BE490763B_Ta_2_2	2B	92.6149	563859708	B	A	B	A	B	A	A	-	A	A	B	A	H	A	A	B	A	B	A	B	B	A	B	B	B	B	A	B	B	B	B	B	A	B	A	B	B	B	A	B	A	H	B	B	B	B
Ex_c55735_1012	2B	93.7645	605000674	B	A	B	A	B	A	A	A	A	A	B	A	H	A	A	B	A	B	B	B	B	A	B	B	B	A	A	B	B	B	B	B	A	B	A	B	B	B	A	B	A	H	B	B	B	B
GENE-0872_343	2B	93.7645	604999257	B	A	B	A	B	A	A	A	A	A	B	A	H	A	A	B	A	B	B	B	B	A	B	B	B	A	A	B	B	B	B	B	A	B	A	B	B	B	A	B	A	H	B	B	H	B
IACX5850	2B	93.7645	599813155	B	A	B	A	B	A	A	A	A	A	B	A	H	A	A	B	A	B	B	B	B	A	B	B	B	A	A	B	B	B	B	B	A	B	A	B	B	B	A	B	A	H	B	B	H	B
Kukri_c32700_104	2B	93.7645	601334051	B	A	B	A	B	A	A	A	A	A	B	A	H	A	A	B	A	B	B	B	B	A	B	B	B	A	A	B	B	B	B	B	A	B	A	B	B	B	A	B	A	H	B	B	H	B
RAC875_c14775_1048	2B	93.7645	600705155	B	A	B	A	B	A	A	H	A	A	B	A	H	A	A	B	A	B	B	B	B	A	B	B	B	A	A	B	B	B	B	B	A	B	A	B	B	B	A	B	A	H	B	B	H	B
wsnp_Ex_c55735_58127324	2B	93.7645	605001459	B	A	B	A	B	A	A	A	A	A	B	A	H	A	A	B	A	B	B	B	B	A	B	B	B	A	A	B	B	B	B	B	A	B	A	B	B	B	A	B	A	H	B	B	H	B
CAP12_c2472_60	2B	94.3392	611282888	B	A	B	A	B	A	A	H	A	A	B	A	H	A	A	B	A	B	B	B	A	A	B	B	B	A	A	B	B	B	B	B	A	B	A	B	B	B	A	B	A	H	B	B	H	B
Ex_c2510_477	2B	94.3392	612066162	B	A	B	A	B	A	A	A	A	A	B	A	H	A	A	B	A	B	B	B	A	A	B	B	B	A	A	B	B	B	B	B	A	B	A	B	B	B	A	B	A	H	B	B	H	B
IAAV3303	2B	94.3392	615365740	B	A	B	A	B	A	A	A	A	A	B	A	H	A	A	B	A	B	B	B	A	A	B	B	B	A	A	B	B	B	B	B	A	B	A	B	B	B	A	B	A	H	B	B	-	B
wsnp_Ex_c1758_3326792	2B	94.3392	612686934	B	A	B	A	B	A	A	A	A	A	B	A	H	A	A	B	A	B	B	B	A	A	B	B	B	A	A	B	B	B	B	B	A	B	A	B	B	B	A	B	A	H	B	B	H	B
wsnp_Ra_c28955_38371323	2B	94.3392		B	A	B	A	B	A	A	A	A	A	B	A	H	A	A	B	A	B	B	B	A	A	B	B	B	A	A	B	B	B	B	B	A	B	A	B	B	B	A	B	A	H	B	B	H	B
wsnp_Ex_c46576_52042185	2B	94.914		B	A	B	A	B	A	A	A	A	A	B	A	B	A	A	B	H	B	B	B	A	A	B	B	B	A	A	A	B	B	B	B	A	B	A	B	B	B	A	B	A	H	B	B	H	B
wsnp_JD_c47318_32176833	2B	94.914		B	A	B	A	B	A	A	A	A	A	B	A	B	A	A	B	H	B	B	B	A	A	B	B	B	A	A	A	B	B	B	B	A	B	A	B	B	B	A	B	A	H	B	B	H	B
BS00064528_51	2B	96.077	638955436	B	A	B	A	B	A	A	H	A	A	B	A	B	A	A	B	H	B	A	B	A	A	B	B	B	A	A	A	B	B	B	B	A	B	A	B	B	B	A	B	A	H	B	B	H	B
wsnp_Ex_rep_c67561_66188180	2B	96.6722		B	A	B	H	B	A	A	H	A	A	B	A	B	A	A	B	H	B	A	B	A	A	B	B	B	A	A	A	B	B	B	B	A	B	A	B	B	B	-	B	A	H	B	B	-	B
BS00012071_51	2B	97.2675	635023684	B	A	B	A	B	A	A	A	A	A	B	A	B	A	A	B	-	B	A	B	A	A	B	B	B	A	A	A	B	B	B	B	A	B	A	B	B	B	A	B	A	H	B	B	-	B
BS00041922_51	2B	97.2675	640489948	B	A	B	A	B	A	A	A	A	A	B	A	B	A	A	B	H	B	A	B	A	A	B	B	B	A	A	A	B	B	B	B	A	B	A	B	B	B	A	B	A	H	B	B	H	B
BS00069685_51	2B	97.2675		-	A	B	A	B	A	A	A	A	A	B	A	B	A	A	B	H	B	A	B	A	A	B	B	B	A	A	A	B	B	B	B	A	B	A	B	B	B	A	B	A	H	B	B	H	B
BS00070861_51	2B	97.2675		B	A	B	A	B	A	A	A	A	A	B	A	B	A	A	B	H	B	A	B	A	A	B	B	B	A	A	A	B	B	B	B	A	B	A	B	B	B	A	B	A	H	B	B	H	B
CAP7_rep_c5636_102	2B	97.2675	640103095	B	A	B	A	B	A	A	-	A	A	B	A	B	A	A	B	H	B	A	B	A	A	B	B	B	A	A	A	B	B	B	B	A	B	A	B	B	B	A	B	A	H	B	B	H	B
Excalibur_c11392_1193	2B	97.2675	641943184	B	A	B	A	B	A	A	A	A	A	B	A	B	A	A	B	H	B	A	B	A	A	B	B	B	A	A	A	B	B	B	B	A	B	A	B	B	B	A	B	A	H	B	B	H	B
GENE-0609_166	2B	97.2675	537217619	B	A	B	A	B	A	A	A	A	A	B	A	B	A	A	B	-	B	A	B	A	A	B	B	B	A	A	A	B	B	B	B	A	B	A	B	B	B	A	B	A	-	B	B	H	B
GENE-0910_153	2B	97.2675	679887395	B	A	B	A	B	A	A	-	A	A	B	A	B	A	A	B	H	B	A	B	A	A	B	B	B	A	A	A	B	B	B	B	A	B	A	B	B	B	A	B	A	H	B	B	H	B
GENE-1125_32	2B	97.2675	536150845	B	A	B	A	B	A	A	A	A	A	B	A	B	A	A	B	H	B	A	B	A	A	B	B	B	A	A	A	B	B	B	B	A	B	A	B	B	B	A	B	A	H	B	B	H	B
GENE-1375_20	2B	97.2675	640104224	B	A	B	A	B	A	A	-	A	A	B	A	B	A	A	B	-	B	A	B	A	A	B	B	B	A	A	A	B	B	B	B	A	B	A	B	B	B	A	B	A	H	B	B	H	B
IAAV9183	2B	97.2675		B	A	B	A	B	A	A	A	A	A	B	A	B	A	A	B	H	B	A	B	A	A	B	B	B	A	A	A	B	B	B	B	A	B	A	B	B	B	A	B	A	H	B	B	H	B
Kukri_c40621_513	2B	97.2675	538281347	B	A	B	A	B	A	A	-	A	A	B	A	B	A	A	B	H	B	A	B	A	A	B	B	B	A	A	A	B	B	B	B	A	B	A	B	B	B	A	B	A	H	B	B	H	B
Ra_c4051_1010	2B	97.2675	638261899	B	A	B	A	B	A	A	A	A	A	B	A	B	A	A	B	H	B	A	B	A	A	B	B	B	A	A	A	B	B	B	B	A	B	A	B	B	B	A	B	A	H	B	B	H	B
RFL_Contig337_1645	2B	97.2675	637574450	B	A	B	A	B	A	A	A	A	A	B	A	B	A	A	B	H	B	A	B	A	A	B	B	B	A	A	A	B	B	B	B	A	B	A	B	B	B	A	B	A	H	B	B	H	B
TA002671-0128-w	2B	97.2675	638630217	B	A	B	A	B	A	A	A	A	A	B	A	B	A	A	B	H	B	A	B	A	A	B	B	B	A	A	A	B	B	B	B	A	B	A	B	B	B	A	B	A	H	B	B	H	B
Tdurum_contig42112_2432	2B	97.2675		B	A	B	A	B	A	A	A	A	A	B	A	B	A	A	B	H	B	A	B	A	A	B	B	B	A	A	A	B	B	B	B	A	B	A	B	B	B	A	B	A	H	B	B	H	-
Tdurum_contig46389_1459	2B	97.2675		B	A	B	A	B	A	A	A	A	A	B	A	B	A	A	B	B	B	A	B	A	A	B	B	B	A	A	A	B	B	B	B	A	B	A	B	B	B	A	B	A	B	B	B	B	B
Tdurum_contig46389_1540	2B	97.2675		B	A	B	A	B	A	A	A	A	A	B	A	B	A	A	B	B	B	A	B	A	A	B	B	B	A	A	A	B	B	B	B	A	B	A	B	B	B	A	B	A	B	B	B	B	B
Tdurum_contig54925_202	2B	97.2675	637574450	B	A	B	A	B	A	A	A	A	A	B	A	B	A	A	B	H	B	A	B	A	A	B	B	B	A	A	A	B	B	B	B	A	B	A	B	B	B	A	B	A	H	B	B	H	B
Tdurum_contig54925_225	2B	97.2675	637574427	B	A	B	A	B	A	A	A	A	A	B	A	B	A	A	B	-	B	A	B	A	A	B	B	B	A	A	A	B	B	B	B	A	B	A	B	B	B	A	B	A	H	B	B	H	B
Tdurum_contig54925_415	2B	97.2675	637574237	B	A	B	A	B	A	A	A	A	A	B	A	B	A	A	B	H	B	A	B	A	A	B	B	B	A	A	A	B	B	B	B	A	B	A	B	B	B	A	B	A	H	B	B	H	B
Tdurum_contig7144_602	2B	97.2675		B	A	B	A	B	A	A	A	A	A	B	A	B	A	A	B	H	B	A	B	A	A	B	B	B	A	A	A	B	B	B	B	A	B	A	B	B	B	A	B	A	H	B	B	H	B
Tdurum_contig82770_296	2B	97.2675		B	A	B	A	B	A	A	A	A	A	B	A	B	A	A	B	-	B	A	B	A	A	B	B	B	A	A	A	B	B	B	B	A	B	A	B	B	B	A	B	A	-	B	B	-	B
wsnp_Ex_c24711_33964543	2B	97.2675	640341216	B	A	B	A	B	A	A	A	A	A	B	A	B	A	A	B	H	B	A	B	A	A	B	B	B	A	A	A	B	B	B	B	A	B	A	B	B	B	A	B	A	H	B	B	H	B
wsnp_JD_c52_87219	2B	97.2675	640689118	B	A	B	A	B	A	A	-	A	A	B	A	B	A	A	B	H	B	A	B	A	A	B	B	B	A	A	A	B	B	B	B	A	B	A	B	B	B	A	B	A	H	B	B	H	B
BobWhite_c10539_201	2B	99.6503	741856756	B	A	B	A	B	A	A	B	A	A	B	A	B	A	A	B	H	B	A	B	A	A	B	B	B	A	A	A	A	B	B	B	A	B	A	B	B	B	A	B	A	B	B	B	B	B
BS00068310_51	2B	99.6503		B	A	B	A	B	A	A	B	A	A	B	A	B	A	A	B	B	B	A	B	A	A	B	B	B	A	A	A	A	B	B	B	A	B	A	B	B	B	A	B	A	B	B	B	B	B
Excalibur_c65341_303	2B	99.6503	695581355	B	A	B	A	B	A	A	B	A	A	B	A	B	A	A	B	-	B	A	B	A	A	B	B	B	A	A	A	A	B	B	B	A	B	A	B	B	B	A	-	A	-	B	B	-	B
Excalibur_c8720_297	2B	99.6503	610277824	B	A	B	A	B	A	A	H	A	A	B	A	B	A	A	B	-	B	A	B	A	A	B	B	B	A	A	A	A	B	B	B	A	B	A	B	B	B	A	B	A	-	B	B	B	B
Excalibur_rep_c68985_110	2B	99.6503	568080946	B	A	B	A	B	A	A	B	A	A	B	A	B	A	A	B	-	B	A	B	A	A	B	B	B	A	A	A	A	B	B	B	A	B	A	B	B	B	A	-	A	-	B	B	-	B
Excalibur_rep_c77221_93	2B	99.6503	680768673	B	A	B	A	B	A	A	H	A	A	B	A	B	A	A	B	A	B	A	B	A	A	B	B	B	A	A	A	A	B	B	B	A	B	A	B	B	B	A	A	A	A	B	B	A	B
Kukri_c30659_91	2B	99.6503	740315248	B	A	B	A	B	A	A	B	A	A	B	A	B	A	A	B	-	B	A	B	A	A	B	B	B	A	A	A	A	B	B	B	A	B	A	B	B	B	A	-	A	-	B	B	B	B
Ra_c27641_452	2B	99.6503		B	A	B	A	B	A	A	-	A	A	B	A	B	A	A	B	-	B	A	B	A	A	B	B	B	A	A	A	A	B	B	B	A	B	A	B	B	B	A	-	A	-	B	B	B	B
RAC875_c110838_165	2B	99.6503	690217550	B	A	B	A	B	A	A	B	A	A	B	A	B	A	A	B	A	B	A	B	A	A	B	B	B	A	A	A	A	B	B	B	A	B	A	B	B	B	A	-	A	A	B	B	A	B
RAC875_c14885_1184	2B	99.6503	696371900	B	A	B	A	B	A	A	B	A	A	B	A	B	A	A	B	-	B	A	B	A	A	B	B	B	A	A	A	A	B	B	B	A	B	A	B	B	B	A	-	A	B	B	B	B	B
RAC875_c29913_139	2B	99.6503		B	A	B	A	B	A	A	B	A	A	B	A	B	A	A	B	-	B	A	B	A	A	B	B	B	A	A	A	A	B	B	B	A	B	A	B	B	B	A	H	A	-	B	B	A	B
RAC875_c32447_187	2B	99.6503		B	A	B	A	B	A	A	B	A	A	B	A	B	A	A	B	B	B	A	B	A	A	B	B	B	A	A	A	A	B	B	B	A	B	A	B	B	B	A	B	A	-	B	B	B	B
wsnp_Ex_c5619_9884202	2B	99.6503	689871569	B	A	B	A	B	A	A	B	A	A	B	A	B	A	A	B	B	B	A	B	A	A	B	B	B	A	A	A	A	B	B	B	A	B	A	B	B	B	A	B	A	B	B	B	B	B
wsnp_Ra_c13679_21569624	2B	99.6503	687205398	B	A	B	A	B	A	A	-	A	A	B	A	B	A	A	B	A	B	A	B	A	A	B	B	B	A	A	A	A	B	B	B	A	B	A	B	B	B	A	-	A	A	B	B	-	B
wsnp_Ra_rep_c74497_72390803	2B	99.6503		B	A	B	A	B	A	A	B	A	A	B	A	B	A	A	B	A	B	A	B	A	A	B	B	B	A	A	A	A	B	B	B	A	B	A	B	B	B	A	A	A	-	B	B	-	B
Kukri_c3024_1268	2B	100.787	657791005	B	A	B	A	B	A	A	A	A	A	B	A	B	A	A	B	-	B	A	B	A	A	B	B	B	A	A	A	A	B	B	B	A	B	A	B	B	B	A	B	A	A	B	B	A	B
BobWhite_c12134_1140	2B	101.349		B	A	B	A	B	A	A	A	A	A	B	A	B	A	A	B	H	B	A	B	A	A	B	B	B	A	A	A	A	B	B	B	A	B	A	B	B	B	A	B	A	H	B	B	H	B
Excalibur_rep_c108225_302	2B	101.349	692834280	B	A	B	A	B	A	A	-	A	A	B	A	B	A	A	B	H	B	A	B	A	A	B	B	B	A	A	A	A	B	B	B	A	B	A	B	B	B	A	B	A	H	B	B	-	B
GENE-1444_162	2B	101.349	657844054	B	A	B	A	B	A	A	A	A	A	B	A	B	A	A	B	H	B	A	B	A	A	B	B	B	A	A	A	A	B	B	B	A	B	A	B	B	B	A	B	A	H	B	B	H	B
IAAV7841	2B	101.349	657790878	B	A	B	A	B	A	A	A	A	A	B	A	B	A	A	B	H	B	A	B	A	A	B	B	B	A	A	A	A	B	B	B	A	B	A	B	B	B	A	B	A	-	B	B	-	B
Kukri_c75902_132	2B	101.349	662684808	B	A	B	A	B	A	A	A	A	A	B	A	B	A	A	B	H	B	A	B	A	A	B	B	B	A	A	A	A	B	B	B	A	B	A	B	B	B	A	B	A	H	B	B	H	B
RAC875_c3947_441	2B	101.349	660461012	B	A	B	A	B	A	A	A	A	A	B	A	B	A	A	B	H	B	A	B	A	A	B	B	B	A	A	A	A	B	B	B	A	B	A	B	B	B	A	B	A	H	B	B	H	B
RAC875_rep_c91134_949	2B	101.349	552194567	B	A	B	A	B	A	A	A	A	A	B	A	B	A	A	B	-	B	A	B	A	A	B	B	B	A	A	A	A	B	B	B	A	B	A	B	B	B	A	B	A	-	B	B	-	B
Tdurum_contig45468_674	2B	101.349		B	A	B	A	B	A	A	A	A	A	B	A	B	A	A	B	-	B	A	B	A	A	B	B	B	A	A	A	A	B	B	B	A	B	A	B	B	B	A	-	A	-	B	B	-	B
wsnp_Ex_c922_1775246	2B	101.349	661777190	B	A	B	A	B	A	A	A	A	A	B	A	B	A	A	B	H	B	A	B	A	A	B	B	B	A	A	A	A	B	B	B	A	B	A	B	B	B	A	B	A	H	B	B	H	B
wsnp_RFL_Contig3522_3685860	2B	101.349		B	A	B	A	B	A	A	A	A	A	B	A	B	A	A	B	-	B	A	B	A	A	B	B	B	A	A	A	A	B	B	B	A	B	A	B	B	B	A	B	A	-	B	B	B	B
BS00012036_51	2B	101.937	646215599	B	A	B	A	B	A	A	-	A	A	B	A	B	A	A	B	H	B	A	B	A	A	B	B	B	A	A	A	B	B	B	B	A	B	A	B	B	B	A	B	A	-	B	B	H	B
Excalibur_c71500_231	2B	101.937	648482734	B	A	B	A	B	A	A	A	A	A	B	A	B	A	A	B	H	B	A	B	A	A	B	B	B	A	A	A	B	B	B	B	A	B	A	B	B	B	A	B	A	H	B	B	H	B
Excalibur_c73922_109	2B	101.937	644146979	B	A	B	A	B	A	A	A	A	A	B	A	B	A	A	B	-	B	A	B	A	A	B	B	B	A	A	A	B	B	B	B	A	B	A	B	B	B	A	B	A	-	B	B	-	B
Excalibur_c73922_55	2B	101.937	644147033	B	A	B	A	B	A	A	A	A	A	B	A	B	A	A	B	H	B	A	B	A	A	B	B	B	A	A	A	B	B	B	B	A	B	A	B	B	B	A	B	A	H	B	B	H	B
GENE-0675_104	2B	101.937	647105402	B	A	B	A	B	A	A	A	A	A	B	A	B	A	A	B	H	B	A	B	A	A	B	B	B	A	A	A	B	B	B	B	A	B	A	B	B	B	A	B	A	H	B	B	H	B
IAAV5675	2B	101.937	645309795	B	A	B	A	B	A	A	A	A	A	B	A	B	A	A	B	H	B	A	B	A	A	B	B	B	A	A	A	B	B	B	B	A	B	A	B	B	B	A	B	A	H	B	B	H	B
Kukri_c1460_1032	2B	101.937	539881608	B	A	B	A	B	A	A	H	A	A	B	A	B	A	A	B	H	B	A	B	A	A	B	B	B	A	A	A	B	B	B	B	A	B	A	B	B	B	A	B	A	H	B	B	H	B
Kukri_c4294_371	2B	101.937	648920801	B	A	B	A	B	A	A	A	A	A	B	A	B	A	A	B	H	B	A	B	A	A	B	B	B	A	A	A	B	B	B	B	A	B	A	B	B	B	A	B	A	H	B	B	H	B
Kukri_c97631_275	2B	101.937		B	A	B	A	B	A	A	A	A	A	B	A	B	A	A	B	H	B	A	B	A	A	B	B	B	A	A	A	B	B	B	B	A	B	A	B	B	B	A	B	A	H	B	B	H	B
Kukri_c9785_62	2B	101.937	643682925	B	A	B	A	B	A	A	A	A	A	B	A	B	A	A	B	-	B	A	B	A	A	B	B	B	A	A	A	B	B	B	B	A	B	A	B	B	B	A	B	A	H	B	B	H	B
Ra_c68109_376	2B	101.937	647108830	B	A	B	A	B	A	A	A	A	A	B	A	B	A	A	B	H	B	A	B	A	A	B	B	B	A	A	A	B	B	B	B	A	B	A	B	B	B	A	B	A	H	B	B	H	B
Ra_c71978_532	2B	101.937		B	A	B	A	B	A	A	A	A	A	B	A	B	A	A	B	H	B	A	B	A	A	B	B	B	A	A	A	B	B	B	B	A	B	A	B	B	B	A	B	A	H	B	B	H	B
RAC875_rep_c72879_435	2B	101.937	647114207	B	A	B	A	B	A	A	A	A	A	B	A	B	A	A	B	H	B	A	B	A	A	B	B	B	A	A	A	B	B	B	B	A	B	A	B	B	B	A	B	A	H	B	B	H	B
TA001720-0874	2B	101.937		B	A	B	A	B	A	A	A	A	A	B	A	B	A	A	B	H	B	A	B	A	A	B	B	B	A	A	A	B	B	B	B	A	B	A	B	B	B	A	B	A	H	B	B	H	B
TA002269-1202	2B	101.937	647316286	B	A	B	A	B	A	A	A	A	A	B	A	B	A	A	B	H	B	A	B	A	A	B	B	B	A	A	A	B	B	B	B	A	B	A	B	B	B	A	B	A	H	B	B	H	B
Tdurum_contig12459_491	2B	101.937	651932447	B	A	B	A	B	A	A	A	A	A	B	A	B	A	A	B	H	B	A	B	A	A	B	B	B	A	A	A	B	B	B	B	A	B	A	B	B	B	A	B	A	H	B	B	H	B
Tdurum_contig12831_69	2B	101.937	647104611	B	A	B	A	B	A	A	A	A	A	B	A	B	A	A	B	H	B	A	B	A	A	B	B	B	A	A	A	B	B	B	B	A	B	A	B	B	B	A	B	A	H	B	B	H	B
wsnp_BF473744B_Ta_2_2	2B	101.937	648082015	B	A	B	A	B	A	A	A	A	A	B	A	B	A	A	B	H	B	A	B	A	A	B	B	B	A	A	A	B	B	B	B	A	B	A	B	B	B	A	B	A	H	B	B	H	B
wsnp_Ex_c17845_26604587	2B	101.937	650285480	B	A	B	A	B	A	A	A	A	A	B	A	B	A	A	B	H	B	A	B	A	A	B	B	B	A	A	A	B	B	B	B	A	B	A	B	B	B	A	B	A	H	B	B	H	B
wsnp_Ex_c9729_16071358	2B	101.937	643685086	B	A	B	A	B	A	A	A	A	A	B	A	B	A	A	B	H	B	A	B	A	A	B	B	B	A	A	A	B	B	B	B	A	B	A	B	B	B	A	B	A	H	B	B	H	B
BS00009247_51	2B	102.518	664219711	B	A	B	A	B	A	A	A	A	A	B	A	B	A	A	B	H	B	A	B	A	A	B	B	B	A	A	A	A	B	B	B	A	B	A	B	B	B	A	B	A	H	B	B	H	B
BS00079013_51	2B	102.518	660114463	B	A	B	A	B	A	A	H	A	A	B	A	B	A	A	B	H	B	A	B	A	A	B	B	B	A	A	A	A	B	B	B	A	B	A	B	B	B	A	B	A	H	B	B	H	B
Kukri_c49010_266	2B	102.518	664219545	B	A	B	A	B	A	A	A	A	A	B	A	B	A	A	B	H	B	A	B	A	A	B	B	B	A	A	A	A	B	B	B	A	B	A	B	B	B	A	B	A	H	B	B	H	B
Kukri_rep_c101529_1199	2B	102.518	664219837	B	A	B	A	B	A	A	A	A	A	B	A	B	A	A	B	H	B	A	B	A	A	B	B	B	A	A	A	A	B	B	B	A	B	A	B	B	B	A	B	A	H	B	B	H	B
Tdurum_contig68666_570	2B	102.518	664214089	B	A	B	A	B	A	A	-	A	A	B	A	B	A	A	B	H	B	A	B	A	A	B	B	B	A	A	A	A	B	B	B	A	B	A	B	B	B	A	B	A	H	B	B	H	B
BobWhite_c13525_262	2B	103.107	735787622	B	A	B	A	B	A	A	B	A	A	B	A	B	A	A	B	H	B	A	B	A	A	B	B	B	A	A	A	A	B	B	B	A	B	A	B	B	B	A	H	A	-	B	B	B	B
BobWhite_c32938_264	2B	103.107	715599509	B	A	B	A	B	A	A	B	A	A	B	A	B	A	A	B	H	B	A	B	A	A	B	B	B	A	A	A	A	B	B	B	A	B	A	B	B	B	A	H	A	H	B	B	-	B
BobWhite_c38001_528	2B	103.107	589496498	B	A	B	A	B	A	A	B	A	A	B	A	B	A	A	B	H	B	A	B	A	A	B	B	B	A	A	A	A	B	B	B	A	B	A	B	B	B	A	H	A	H	B	B	H	B
BobWhite_c55700_273	2B	103.107	736247209	B	A	B	A	B	A	A	B	A	A	B	A	B	A	A	B	H	B	A	B	A	A	B	B	B	A	A	A	A	B	B	B	A	B	A	B	B	B	A	H	A	H	B	B	B	B
BobWhite_c9690_94	2B	103.107	743729225	B	A	B	A	B	A	A	B	A	A	B	A	B	A	A	B	H	B	A	B	A	A	B	B	B	A	A	A	A	B	B	B	A	B	A	B	B	B	A	H	A	H	B	B	B	B
BobWhite_rep_c65414_125	2B	103.107	608761624	B	A	B	A	B	A	A	B	A	A	B	A	B	A	A	B	H	B	A	B	A	A	B	B	B	A	A	A	A	B	B	B	A	B	A	B	B	B	A	H	A	H	B	B	B	B
BS00003606_51	2B	103.107	718885377	B	A	B	A	B	A	A	B	A	A	B	A	B	A	A	B	H	B	A	B	A	A	B	B	B	A	A	A	A	B	B	B	A	B	A	B	B	B	A	H	A	H	B	B	H	B
BS00004224_51	2B	103.107	730563020	B	A	B	A	B	A	A	B	A	A	B	A	B	A	A	B	H	B	A	B	A	A	B	B	B	A	A	A	A	B	B	B	A	B	A	B	B	B	A	H	A	H	B	B	H	B
BS00011630_51	2B	103.107	688459169	B	A	B	A	B	A	A	B	A	A	B	A	B	A	A	B	H	B	A	B	A	A	B	B	B	A	A	A	A	B	B	B	A	B	A	B	B	B	A	H	A	H	B	B	H	B
BS00016650_51	2B	103.107	683029170	B	A	B	A	B	A	A	B	A	A	B	A	B	A	A	B	H	B	A	B	A	A	B	B	B	A	A	A	A	B	B	B	A	B	A	B	B	B	A	H	A	H	B	B	H	B
BS00022674_51	2B	103.107	726547785	B	A	B	A	B	A	A	B	A	A	B	A	B	A	A	B	H	B	A	B	A	A	B	B	B	A	A	A	A	B	B	B	A	B	A	B	B	B	A	H	A	H	B	B	H	B
BS00022717_51	2B	103.107	680573506	B	A	B	A	B	A	A	B	A	A	B	A	B	A	A	B	H	B	A	B	A	A	B	B	B	A	A	A	A	B	B	B	A	B	A	B	B	B	A	H	A	H	B	B	H	B
BS00023124_51	2B	103.107	683046930	B	A	B	A	B	A	A	B	A	A	B	A	B	A	A	B	H	B	A	B	A	A	B	B	B	A	A	A	A	B	B	B	A	B	A	B	B	B	A	H	A	H	B	B	H	B
BS00025650_51	2B	103.107	716780342	B	A	B	A	B	A	A	B	A	A	B	A	B	A	A	B	H	B	A	B	A	A	B	B	B	A	A	A	A	B	B	B	A	B	A	B	B	B	A	H	A	H	B	B	H	B
BS00031253_51	2B	103.107	696373573	B	A	B	A	B	A	A	B	A	A	B	A	B	A	A	B	H	B	A	B	A	A	B	B	B	A	A	A	A	B	B	B	A	B	A	B	B	B	A	H	A	H	B	B	H	B
BS00035380_51	2B	103.107	740313563	B	A	B	A	B	A	A	B	A	A	B	A	B	A	A	B	H	B	A	B	A	A	B	B	B	A	A	A	A	B	B	B	A	B	A	B	B	B	A	H	A	H	B	B	B	B
BS00039686_51	2B	103.107	694055814	B	A	B	A	B	A	A	B	A	A	B	A	B	A	A	B	H	B	A	B	A	A	B	B	B	A	A	A	A	B	B	B	A	B	A	B	B	B	A	H	A	H	B	B	H	B
BS00046165_51	2B	103.107	697510335	B	A	B	A	B	A	A	B	A	A	B	A	B	A	A	B	H	B	A	B	A	A	B	B	B	A	A	A	A	B	B	B	A	B	A	B	B	B	A	H	A	H	B	B	H	B
BS00059896_51	2B	103.107	683030868	B	A	B	A	B	A	A	B	A	A	B	A	B	A	A	B	H	B	A	B	A	A	B	B	B	A	A	A	A	B	B	B	A	B	A	B	B	B	A	H	A	H	B	B	H	B
BS00063727_51	2B	103.107		B	A	B	A	B	A	A	B	A	A	B	A	B	A	A	B	B	B	A	B	A	A	B	B	B	A	A	A	A	B	B	B	A	B	A	B	B	B	A	H	A	H	B	B	H	B
BS00065327_51	2B	103.107	731481895	B	A	B	A	B	A	A	B	A	A	B	A	B	A	A	B	H	B	A	B	A	A	B	B	B	A	A	A	A	B	B	B	A	B	A	B	B	B	A	H	A	H	B	B	H	B
BS00067572_51	2B	103.107		B	A	B	A	B	A	A	H	A	A	B	A	B	A	A	B	-	B	A	B	A	A	B	B	B	A	A	A	A	B	B	B	A	B	A	B	B	B	A	H	A	H	B	B	H	B
BS00081109_51	2B	103.107	734453472	B	A	B	A	B	A	A	H	A	A	B	A	B	A	A	B	H	B	A	B	A	A	B	B	B	A	A	A	A	B	B	B	A	B	A	B	B	B	A	H	A	H	B	B	B	B
BS00092031_51	2B	103.107	740805231	B	A	B	A	B	A	A	-	A	A	B	A	B	A	A	B	H	B	A	B	A	A	B	B	B	A	A	A	A	B	B	B	A	B	A	B	B	B	A	H	A	H	B	B	B	B
BS00092869_51	2B	103.107	696677187	B	A	B	A	B	A	A	B	A	A	B	A	B	A	A	B	H	B	A	B	A	A	B	B	B	A	A	A	A	B	B	B	A	B	A	B	B	B	A	-	A	-	B	B	-	B
BS00094330_51	2B	103.107	743693480	B	A	B	A	B	A	A	B	A	A	B	A	B	A	A	B	H	B	A	B	A	A	B	B	B	A	A	A	A	B	B	B	A	B	A	B	B	B	A	H	A	H	B	B	B	B
BS00100981_51	2B	103.107		B	A	B	A	B	A	A	B	A	A	B	A	B	A	A	B	H	B	A	B	A	A	B	B	B	A	A	A	A	B	B	B	A	B	A	B	B	B	A	H	A	H	B	B	B	B
BS00107235_51	2B	103.107		B	A	B	A	B	A	A	B	A	A	B	A	B	A	A	B	H	B	A	B	A	A	B	B	B	A	A	A	A	B	B	B	A	B	A	B	B	B	-	H	A	H	B	B	H	B
BS00110588_51	2B	103.107	719965157	B	A	B	A	B	A	A	-	A	A	B	A	B	A	A	B	H	B	A	B	A	A	B	B	B	A	A	A	A	B	B	B	A	B	A	B	B	B	A	H	A	H	B	B	H	B
CAP8_c5161_541	2B	103.107	725960659	B	A	B	A	B	A	A	B	A	A	B	A	B	A	A	B	-	B	A	B	A	A	B	B	B	A	A	A	A	B	B	B	A	B	A	B	B	B	A	H	A	H	B	B	H	B
CAP8_rep_c6372_264	2B	103.107		B	A	B	A	B	A	A	H	A	A	B	A	B	A	A	B	H	B	A	B	A	A	B	B	B	A	A	A	A	B	B	B	A	B	A	B	B	B	A	H	A	H	B	B	H	B
CAP8_rep_c8162_101	2B	103.107		B	A	B	A	B	A	A	H	A	A	B	A	B	A	A	B	H	B	A	B	A	A	B	B	B	A	A	A	A	B	B	B	A	B	A	B	B	B	A	H	A	H	B	B	H	B
Excalibur_c13180_67	2B	103.107	593271360	B	A	B	A	B	A	A	H	A	A	B	A	B	A	A	B	H	B	A	B	A	A	B	B	B	A	A	A	A	B	B	B	A	B	A	B	B	B	A	H	A	H	B	B	H	B
Excalibur_c14201_111	2B	103.107	600343636	B	A	B	A	B	A	A	B	A	A	B	A	B	A	A	B	H	B	A	B	A	A	B	B	B	A	A	A	A	B	B	B	A	B	A	B	B	B	A	H	A	H	B	B	H	B
Excalibur_c18165_395	2B	103.107	741860392	B	A	B	A	B	A	A	B	A	A	B	A	B	A	A	B	H	B	A	B	A	A	B	B	B	A	A	A	A	B	B	B	A	B	A	B	B	B	A	H	A	H	B	B	B	B
Excalibur_c2157_173	2B	103.107		B	A	B	A	B	A	A	-	A	A	B	A	B	A	A	B	H	B	A	B	A	A	B	B	B	A	A	A	A	B	B	B	A	B	A	B	B	B	A	H	A	H	B	B	B	B
Excalibur_c2484_1329	2B	103.107	717475528	B	A	B	-	B	A	-	B	A	H	B	-	B	-	A	B	B	B	-	B	A	A	B	B	B	-	H	A	A	B	B	B	A	B	A	B	B	B	A	-	-	H	B	B	B	B
Excalibur_c2484_2113	2B	103.107	717474744	B	A	B	A	B	A	A	B	A	A	B	A	B	A	A	B	H	B	A	B	A	A	B	B	B	A	A	A	A	B	B	B	A	B	A	B	B	B	A	H	A	H	B	B	H	B
Excalibur_c35074_106	2B	103.107	734495493	B	A	B	A	B	A	A	B	A	A	B	A	B	A	A	B	H	B	A	B	A	A	B	B	B	A	A	A	A	B	B	B	A	B	A	B	B	B	A	H	A	H	B	B	B	B
Excalibur_c35074_257	2B	103.107	734495342	B	A	B	A	B	A	A	B	A	A	B	A	B	A	A	B	H	B	A	B	A	A	B	B	B	A	A	A	A	B	B	B	A	B	A	B	B	B	A	H	A	H	B	B	B	B
Excalibur_c37753_655	2B	103.107		B	A	B	A	B	A	A	H	A	A	B	A	B	A	A	B	H	B	A	B	A	A	B	B	B	A	A	A	A	B	B	B	A	B	A	B	B	B	A	H	A	H	B	B	B	B
Excalibur_c40976_111	2B	103.107	571077902	B	A	B	A	B	A	A	-	A	A	B	A	B	A	A	B	H	B	A	B	A	A	B	B	B	A	A	A	A	B	B	B	A	B	A	B	B	B	A	H	A	H	B	B	H	B
Excalibur_c40976_87	2B	103.107	571077878	B	A	B	A	B	A	A	-	A	A	B	A	B	A	A	B	H	B	A	B	A	A	B	B	B	A	A	A	A	B	B	B	A	B	A	B	B	B	A	H	A	H	B	B	H	B
Excalibur_c57590_187	2B	103.107	710897682	B	A	B	A	B	A	A	B	A	A	B	A	B	A	A	B	H	B	A	B	A	A	B	B	B	A	A	A	A	B	B	B	A	B	A	B	B	B	A	-	A	H	B	B	H	B
Excalibur_c6735_214	2B	103.107	593274158	B	A	B	A	B	A	A	H	A	A	B	A	B	A	A	B	B	B	A	B	A	A	B	B	B	A	A	A	A	B	B	B	A	B	A	B	B	B	A	H	A	H	B	B	H	B
Excalibur_c80601_278	2B	103.107	713676010	B	A	B	A	B	A	A	B	A	A	B	A	B	A	A	B	H	B	A	B	A	A	B	B	B	A	A	A	A	B	B	B	A	B	A	B	B	B	A	H	A	H	B	B	H	B
Excalibur_c80601_308	2B	103.107	713676040	B	A	B	A	B	A	A	B	A	A	B	A	B	A	A	B	-	B	A	B	A	A	B	B	B	A	A	A	A	B	B	B	A	B	A	B	B	B	A	H	A	H	B	B	B	B
Excalibur_c95944_641	2B	103.107		B	A	B	A	B	A	A	B	A	A	B	A	B	A	A	B	-	B	A	B	A	A	B	B	B	A	A	A	A	B	B	B	A	B	A	B	B	B	A	H	A	H	B	B	-	B
Excalibur_rep_c101581_184	2B	103.107	721113783	B	A	B	A	B	A	A	B	A	A	B	A	B	A	A	B	H	B	A	B	A	A	B	B	B	A	A	A	A	B	B	B	A	B	A	B	B	B	A	H	A	H	B	B	H	B
Excalibur_rep_c110697_196	2B	103.107		B	A	B	A	B	A	A	B	A	A	B	A	B	A	A	B	H	B	A	B	A	A	B	B	B	A	A	A	A	B	B	B	A	B	A	B	B	B	A	H	A	H	B	B	H	B
GENE-1232_258	2B	103.107	743693304	B	A	B	A	B	A	A	B	A	A	B	A	B	A	A	B	H	B	A	B	A	A	B	B	B	A	A	A	A	B	B	B	A	B	A	B	B	B	A	H	A	H	B	B	B	B
IAAV1401	2B	103.107	594545655	B	A	B	A	B	A	A	B	A	A	B	A	B	A	A	B	H	B	A	B	A	A	B	B	B	A	A	A	A	B	B	B	A	B	A	B	B	B	A	H	A	H	B	B	H	B
IAAV3984	2B	103.107	271295210	B	A	B	A	B	A	A	-	A	A	B	A	B	A	A	B	H	B	A	B	A	A	B	B	B	A	A	A	A	B	B	B	A	B	A	B	B	B	A	H	A	H	B	B	B	B
IACX6309	2B	103.107	577149399	B	A	B	A	B	A	A	B	A	A	B	A	B	A	A	B	H	B	A	B	A	A	B	B	B	A	A	A	A	B	B	B	A	B	A	B	B	B	A	H	A	H	B	B	H	B
Jagger_c6543_220	2B	103.107	725961161	B	A	B	A	B	A	A	B	A	A	B	A	B	A	A	B	H	B	A	B	A	A	B	B	B	A	A	A	A	B	B	B	A	B	A	B	B	B	A	H	A	H	B	B	H	B
Ku_c3479_1035	2B	103.107	743331273	B	A	B	A	B	A	A	-	A	A	B	A	B	A	A	B	H	B	A	B	A	A	B	B	B	A	A	A	A	B	B	B	A	B	A	B	B	B	A	H	A	H	B	B	B	B
Kukri_c101063_740	2B	103.107	721113033	B	A	B	A	B	A	A	-	A	A	B	A	B	A	A	B	H	B	A	B	A	A	B	B	B	A	A	A	A	B	B	B	A	B	A	B	B	B	A	H	A	H	B	B	H	B
Kukri_c19198_379	2B	103.107		B	A	B	A	B	A	A	B	A	A	B	A	B	A	A	B	H	B	A	B	A	A	B	B	B	A	A	A	A	B	B	B	A	B	A	B	B	B	A	H	A	H	B	B	H	B
Kukri_c31059_130	2B	103.107		B	A	B	A	B	A	A	B	A	A	B	A	B	A	A	B	H	B	A	B	A	A	B	B	B	A	A	A	A	B	B	B	A	B	A	B	B	B	A	H	A	H	B	B	H	B
Kukri_c38497_174	2B	103.107	736790823	B	A	B	A	B	A	A	B	A	A	B	A	B	A	A	B	H	B	A	B	A	A	B	B	B	A	A	A	A	B	B	B	A	B	A	B	B	B	A	H	A	H	B	B	B	B
Kukri_c52356_96	2B	103.107	693314967	B	A	B	A	B	A	A	B	A	A	B	A	B	A	A	B	H	B	A	B	A	A	B	B	B	A	A	A	A	B	B	B	A	B	A	B	B	B	A	H	A	H	B	B	H	B
Kukri_c57014_168	2B	103.107	734127065	B	A	B	A	B	A	A	B	A	A	B	A	B	A	A	B	-	B	A	B	A	A	B	B	B	A	A	A	A	B	B	B	A	B	A	B	B	B	A	H	A	H	B	B	B	B
Kukri_c7953_513	2B	103.107		B	A	B	A	B	A	A	B	A	A	B	A	B	A	A	B	H	B	A	B	A	A	B	B	B	A	A	A	A	B	B	B	A	B	A	B	B	B	A	H	A	H	B	B	H	B
Kukri_c84629_315	2B	103.107	695508999	B	A	B	A	B	A	A	B	A	A	B	A	B	A	A	B	H	B	A	B	A	A	B	B	B	A	A	A	A	B	B	B	A	B	A	B	B	B	A	H	A	H	B	B	H	B
Kukri_rep_c68903_301	2B	103.107	730188559	B	A	B	A	B	A	A	B	A	A	B	A	B	A	A	B	H	B	A	B	A	A	B	B	B	A	A	A	A	B	B	B	A	B	A	B	B	B	A	H	A	H	B	B	H	B
Kukri_rep_c68903_708	2B	103.107	730189372	B	A	B	A	B	A	A	H	A	A	B	A	B	A	A	B	H	B	A	B	A	A	B	B	B	A	A	A	A	B	B	B	A	B	A	B	B	B	A	H	A	H	B	B	H	B
RAC875_c10132_462	2B	103.107	700208672	B	A	B	A	B	A	A	H	A	A	B	A	B	A	A	B	H	B	A	B	A	A	B	B	B	A	A	A	A	B	B	B	A	B	A	B	B	B	A	H	A	H	B	B	H	B
RAC875_c17455_152	2B	103.107		B	A	B	A	B	A	A	-	A	A	B	A	B	A	A	B	-	B	A	B	A	A	B	B	B	A	A	A	A	B	B	B	A	B	A	B	B	B	A	H	A	H	B	B	-	B
RAC875_c17459_566	2B	103.107		B	A	B	A	B	A	A	B	A	A	B	A	B	A	A	B	H	B	A	B	A	A	B	B	B	A	A	A	A	B	B	B	A	B	A	B	B	B	A	H	A	H	B	B	H	B
RAC875_c3397_1492	2B	103.107	577151911	B	A	B	A	B	A	A	B	A	A	B	A	B	A	A	B	H	B	A	B	A	A	B	B	B	A	A	A	A	B	B	B	A	B	A	B	B	B	A	H	A	H	B	B	H	B
RAC875_c8197_810	2B	103.107	571077610	B	A	B	A	B	A	A	H	A	A	B	A	B	A	A	B	H	B	A	B	A	A	B	B	B	A	A	A	A	B	B	B	A	B	A	B	B	B	A	H	A	H	B	B	H	B
RAC875_rep_c106542_272	2B	103.107		B	A	B	A	B	A	A	B	A	A	B	A	B	A	A	B	H	B	A	B	A	A	B	B	B	A	A	A	A	B	B	B	A	B	A	B	B	B	A	H	A	H	B	B	H	B
RFL_Contig3172_1752	2B	103.107	577154328	B	A	B	A	B	A	A	B	A	A	B	A	B	A	A	B	H	B	A	B	A	A	B	B	B	A	A	A	A	B	B	B	A	B	A	B	B	B	A	H	A	H	B	B	H	B
RFL_Contig4499_1145	2B	103.107	738682101	B	A	B	A	B	A	A	B	A	A	B	A	B	A	A	B	H	B	A	B	A	A	B	B	B	A	A	A	A	B	B	B	A	B	A	B	B	B	A	H	A	H	B	B	B	B
RFL_Contig4499_204	2B	103.107	738681209	B	A	B	A	B	A	A	B	A	A	B	A	B	A	A	B	-	B	A	B	A	A	B	B	B	A	A	A	A	B	B	B	A	B	A	B	B	B	A	H	A	-	B	B	B	B
TA002338-0901	2B	103.107	719520294	B	A	B	A	B	A	A	B	A	A	B	A	B	A	A	B	H	B	A	B	A	A	B	B	B	A	A	A	A	B	B	B	A	B	A	B	B	B	A	H	A	H	B	B	H	B
TA011763-0791	2B	103.107		B	A	B	A	B	A	A	B	A	A	B	A	B	A	A	B	H	B	A	B	A	A	B	B	B	A	A	A	A	B	B	B	A	B	A	B	B	B	A	H	A	H	B	B	H	B
TA013902-0228	2B	103.107	729287020	B	A	B	A	B	A	A	B	A	A	B	A	B	A	A	B	H	B	A	B	A	A	B	B	B	A	A	A	A	B	B	B	A	B	A	B	B	B	A	H	A	H	B	B	H	B
Tdurum_contig28980_211	2B	103.107	608198760	B	A	B	A	B	A	A	B	A	A	B	A	B	A	A	B	H	B	A	B	A	A	B	B	B	A	A	A	A	B	B	B	A	B	A	B	B	B	A	H	A	H	B	B	B	B
Tdurum_contig32221_462	2B	103.107		B	A	B	A	B	A	A	B	A	A	B	A	B	A	A	B	H	B	A	B	A	A	B	B	B	A	A	A	A	B	B	B	A	B	A	B	B	B	A	H	A	H	B	B	H	B
Tdurum_contig54784_485	2B	103.107	718967996	B	A	B	A	B	A	A	B	A	A	B	A	B	A	A	B	H	B	A	B	A	A	B	B	B	A	A	A	A	B	B	B	A	B	A	B	B	B	A	H	A	H	B	B	H	B
Tdurum_contig55699_246	2B	103.107	683028860	B	A	B	A	B	A	A	B	A	A	B	A	B	A	A	B	H	B	A	B	A	A	B	B	B	A	A	A	A	B	B	B	A	B	A	B	B	B	A	H	A	H	B	B	H	B
Tdurum_contig56876_365	2B	103.107	726547689	B	A	B	A	B	A	A	B	A	A	B	A	B	A	A	-	-	B	A	B	A	A	B	B	B	A	A	A	A	B	B	B	A	B	A	B	B	B	A	H	A	H	B	B	H	B
Tdurum_contig71365_233	2B	103.107	738410414	B	A	B	A	B	A	A	B	A	A	B	A	B	A	A	B	H	B	A	B	A	A	B	B	B	A	A	A	A	B	B	B	A	B	A	B	B	B	A	H	A	H	B	B	B	B
Tdurum_contig82393_581	2B	103.107		B	A	B	A	B	A	A	B	A	A	B	A	B	A	A	B	H	B	A	B	A	A	B	B	B	A	A	A	A	B	B	B	A	B	A	B	B	B	A	H	A	H	B	B	H	B
tplb0024l03_910	2B	103.107	713675758	B	A	B	A	B	A	A	B	A	A	B	A	B	A	A	B	H	B	A	B	A	A	B	B	B	A	A	A	A	B	B	B	A	B	A	B	B	B	A	H	A	H	B	B	H	B
wsnp_CAP7_c1592_791887	2B	103.107	725960423	B	A	B	A	B	A	A	-	A	A	B	A	B	A	A	B	H	B	A	B	A	A	B	B	B	A	A	A	A	B	B	B	A	B	A	B	B	B	A	H	A	H	B	B	H	B
wsnp_CAP7_c317_172502	2B	103.107	731000003	B	A	B	A	B	A	A	B	A	A	B	A	B	A	A	B	H	B	A	B	A	A	B	B	B	A	A	A	A	B	B	B	A	B	A	B	B	B	A	H	A	H	B	B	H	B
wsnp_Ex_c4024_7278036	2B	103.107	742525456	B	A	B	A	B	A	A	-	A	A	B	A	B	A	A	B	H	B	A	B	A	A	B	B	B	A	A	A	A	B	B	B	A	B	A	B	B	B	A	H	A	H	B	B	B	B
wsnp_Ex_c40976_47910672	2B	103.107	709836642	B	A	B	A	B	A	A	B	A	A	B	A	B	A	A	B	H	B	A	B	A	A	B	B	B	A	A	A	A	B	B	B	A	B	A	B	B	B	A	H	A	H	B	B	H	B
wsnp_Ex_c45468_51254978	2B	103.107	732606339	B	A	B	A	B	A	A	B	A	A	B	A	B	A	A	B	H	B	A	B	A	A	B	B	B	A	A	A	A	B	B	B	A	B	A	B	B	B	A	H	A	H	B	B	H	B
wsnp_Ex_c5123_9087869	2B	103.107	696677326	B	A	B	A	B	A	A	B	A	A	B	A	B	A	A	B	H	B	A	B	A	A	B	B	B	A	A	A	A	B	B	B	A	B	A	B	B	B	A	H	A	H	B	B	H	B
wsnp_Ex_c5123_9089025	2B	103.107	696678792	B	A	B	A	B	A	A	-	A	A	B	A	B	A	A	B	H	B	A	B	A	A	B	B	B	A	A	A	A	B	B	B	A	B	A	B	B	B	A	H	A	H	B	B	H	B
wsnp_Ex_rep_c102127_87360034	2B	103.107	709821690	B	A	B	A	B	A	A	B	A	A	B	A	B	-	A	B	H	B	A	B	A	H	B	B	B	A	A	-	A	B	B	B	A	B	A	B	B	B	A	H	A	H	B	B	B	B
wsnp_RFL_Contig3917_4326857	2B	103.107	609488700	B	A	B	A	B	A	A	B	A	A	B	A	B	A	A	B	H	B	A	B	A	A	B	B	B	A	A	A	A	B	B	B	A	B	A	B	B	B	A	H	A	H	B	B	B	B
IAAV283	2B	104.515	617894238	B	A	B	A	B	A	A	B	A	A	B	A	B	A	A	B	B	B	A	B	A	A	B	A	B	A	A	A	A	B	B	B	A	B	A	B	B	B	A	-	A	-	B	B	B	B
Tdurum_contig10108_246	2B	104.515	27063831	B	A	B	A	B	A	A	B	A	A	B	A	B	A	A	B	B	B	A	B	A	A	B	A	B	A	A	A	A	B	B	B	A	B	A	B	B	B	A	H	A	H	B	B	B	B
BobWhite_rep_c64068_241	2B	108.957		B	A	B	A	B	A	A	B	A	A	B	A	B	H	A	B	A	B	A	B	A	A	B	A	B	A	A	A	B	B	B	B	A	B	A	B	B	B	A	A	A	A	A	B	B	A
Ex_c52711_584	2B	108.957		B	A	B	A	B	A	A	B	A	A	B	A	B	H	A	B	A	B	A	B	A	A	B	A	B	A	A	A	B	B	B	B	A	B	A	B	B	B	A	A	A	A	A	B	B	A
Excalibur_c56550_71	2B	108.957	775169387	B	A	B	A	B	A	A	H	A	A	B	A	B	H	A	B	A	B	A	B	A	A	B	A	B	A	A	A	B	B	B	B	A	B	A	B	B	B	A	A	A	A	A	B	B	A
Kukri_c10869_1591	2B	108.957	775169349	B	A	B	A	B	A	A	-	A	A	B	A	B	-	A	B	A	B	A	B	A	A	B	A	B	A	A	A	B	B	B	B	A	B	A	B	B	B	A	A	A	A	A	B	B	A
RFL_Contig2751_1562	2B	108.957	774945112	B	A	B	A	B	A	A	B	A	A	B	A	B	H	A	B	A	B	A	B	A	A	B	A	B	A	A	A	B	B	B	B	A	B	A	B	B	B	A	A	A	A	A	B	B	A
BobWhite_c33464_133	2B	110.094	767176664	B	A	B	A	B	A	A	B	A	A	B	A	B	H	A	B	A	B	A	B	A	A	B	A	B	A	A	A	B	B	B	B	A	B	A	B	B	B	A	A	A	A	A	B	B	A
BobWhite_c5191_362	2B	110.094	767169901	B	A	B	A	B	A	A	B	A	A	B	A	B	H	A	B	A	B	A	B	A	A	B	A	B	A	A	A	B	B	B	B	A	B	A	B	B	B	A	A	A	A	A	B	B	A
BobWhite_c5191_563	2B	110.094	755975155	B	A	B	A	B	A	A	B	A	A	B	A	B	H	A	B	A	B	A	B	A	A	B	A	B	A	A	A	B	B	B	B	A	B	A	B	B	B	A	A	A	A	A	B	B	A
BS00009882_51	2B	110.094	767651618	B	A	B	A	B	A	A	B	A	A	B	A	B	H	A	B	A	B	A	B	A	A	B	A	B	A	A	A	B	B	B	B	A	B	A	B	B	B	A	A	A	A	A	B	B	A
BS00011047_51	2B	110.094	765278696	B	A	B	A	B	A	A	B	A	A	B	A	B	H	A	B	A	B	A	B	A	A	B	A	B	A	A	A	B	B	B	B	A	B	A	B	B	B	A	A	A	A	A	B	B	A
BS00046601_51	2B	110.094	767375355	B	A	B	A	B	A	A	B	A	A	B	A	B	H	A	B	A	B	A	B	A	A	B	A	B	A	A	A	B	B	B	B	A	B	A	B	B	B	A	A	A	A	A	B	B	A
BS00106695_51	2B	110.094	767171587	B	A	B	A	B	A	A	B	A	A	B	A	B	H	A	B	A	B	A	B	A	A	B	A	B	A	A	A	B	B	B	B	A	B	A	B	B	B	A	A	A	A	A	B	B	A
CAP12_s9114_61	2B	110.094	767132251	B	A	B	A	B	A	A	-	A	A	B	A	B	H	A	B	A	B	A	B	A	A	B	A	B	A	A	A	B	B	B	B	A	B	A	B	B	B	A	A	A	A	A	B	B	A
Excalibur_c1883_340	2B	110.094	768548794	B	A	B	A	B	A	A	B	A	A	B	A	B	H	A	B	A	B	A	B	A	A	B	A	B	A	A	A	B	B	B	B	A	B	A	B	B	B	A	A	A	A	A	B	B	A
Excalibur_c31864_713	2B	110.094	758532082	B	A	B	A	B	A	A	B	A	A	B	A	B	H	A	B	A	B	A	B	A	A	B	A	B	A	A	A	B	B	B	B	A	B	A	B	B	B	A	A	A	A	A	B	B	A
Excalibur_c65466_714	2B	110.094		B	A	B	A	B	A	A	B	A	A	B	A	B	H	A	B	A	B	A	B	A	A	B	A	B	A	A	A	B	B	B	B	A	B	A	B	B	B	A	A	A	A	A	B	B	A
Excalibur_c7051_1027	2B	110.094	624553645	B	A	B	A	B	A	A	B	A	A	B	A	B	H	A	B	A	B	A	B	A	A	B	A	B	A	A	A	B	B	B	B	A	B	A	B	B	B	A	A	A	A	A	B	B	A
IAAV1502	2B	110.094	769949884	B	A	B	A	B	A	A	B	A	A	B	A	B	H	A	B	A	B	A	B	A	A	B	A	B	A	A	A	B	B	B	B	A	B	A	B	B	B	A	A	A	A	A	B	B	A
IACX8828	2B	110.094		B	A	B	A	B	A	A	B	A	A	B	A	B	H	A	B	A	B	A	B	A	A	B	A	B	A	A	A	B	B	B	B	A	B	A	B	B	B	A	A	A	A	A	B	B	A
Kukri_c27631_1329	2B	110.094	767018159	B	A	B	A	B	A	A	B	A	A	B	A	B	H	A	B	A	B	A	B	A	A	B	A	B	A	A	A	B	B	B	B	A	B	A	B	B	B	A	A	A	A	A	B	B	A
Kukri_c34553_89	2B	110.094	766234248	B	A	B	A	B	A	A	B	A	A	B	A	B	H	A	B	A	B	A	B	A	A	B	A	B	A	A	A	B	B	B	B	A	B	A	B	B	B	A	A	A	A	A	B	B	A
Kukri_c55909_1109	2B	110.094	770681399	B	A	B	A	B	A	A	B	A	A	B	A	B	H	A	B	A	B	A	B	-	A	B	A	B	A	A	A	B	B	B	B	A	B	A	B	B	B	A	A	A	A	A	B	B	A
RAC875_c1858_2693	2B	110.094	627926191	B	A	B	A	B	A	A	B	A	A	B	A	B	H	A	B	A	B	A	B	A	A	B	A	B	A	A	A	B	B	B	B	A	B	A	B	B	B	A	A	A	A	A	B	B	A
RAC875_c22463_494	2B	110.094	767170221	B	A	B	A	B	A	A	B	A	A	B	A	B	H	A	B	A	B	A	B	A	A	B	A	B	A	A	A	B	B	B	B	A	B	A	B	B	B	A	A	A	A	A	B	B	A
RAC875_c31328_381	2B	110.094	629208150	B	A	B	A	B	A	A	B	A	A	B	A	B	H	A	B	A	B	A	B	A	A	B	A	B	A	A	A	B	B	B	B	A	B	A	B	B	B	A	A	A	A	A	B	B	A
RAC875_c37540_583	2B	110.094	769072246	B	A	B	A	B	A	A	B	A	A	B	A	B	H	A	B	A	B	A	B	A	A	B	A	B	A	A	A	B	B	B	B	A	B	A	B	B	B	A	A	A	A	A	B	B	A
RFL_Contig3713_316	2B	110.094	767021373	B	A	B	A	B	A	A	B	A	A	B	A	B	H	A	B	A	B	A	B	A	A	B	A	B	A	A	A	B	B	B	B	A	B	A	B	B	B	A	A	A	A	A	B	B	A
TA004710-0394	2B	110.094		B	A	B	A	B	A	A	B	A	A	B	A	B	H	A	B	A	B	A	B	A	A	B	A	B	A	A	A	B	B	B	B	A	B	A	B	B	B	A	A	A	A	A	B	B	A
BS00080318_51	2B	110.65	763842555	B	A	B	A	B	A	A	B	A	A	B	A	B	H	A	B	A	B	A	B	A	A	B	A	B	A	A	A	B	B	B	B	A	B	A	B	B	B	A	A	A	A	A	B	B	A
BS00084417_51	2B	110.65	763633070	B	A	B	A	B	A	A	B	A	A	B	A	B	H	A	B	A	B	A	B	A	A	B	A	B	A	A	A	B	B	B	B	A	B	A	B	B	B	A	A	A	A	A	B	B	A
Excalibur_c10441_984	2B	110.65	763630822	B	A	B	A	B	A	A	B	A	A	B	A	B	H	A	B	A	B	A	B	A	A	B	A	B	A	A	A	B	B	B	B	A	B	A	B	B	B	A	A	A	A	A	B	B	A
Excalibur_c224_1383	2B	110.65	621965417	B	A	B	A	B	A	A	B	A	A	B	A	B	H	A	B	A	B	A	B	A	A	B	A	B	A	A	A	B	B	B	B	A	B	A	B	B	B	A	A	A	A	A	B	B	A
GENE-1355_130	2B	110.65	621845138	B	A	B	A	B	A	A	B	A	A	B	A	B	-	A	B	A	B	A	B	A	A	B	A	B	A	A	A	B	B	B	B	A	B	A	B	B	B	A	A	A	A	A	B	B	A
Jagger_c7688_98	2B	110.65	765072211	B	A	B	A	B	A	A	B	A	A	B	A	B	H	A	B	A	B	A	B	A	A	B	A	B	A	A	A	B	B	B	B	A	B	A	B	B	B	A	A	A	A	A	B	B	A
Kukri_c18754_67	2B	110.65	622925418	B	A	B	A	B	A	A	B	A	A	B	A	B	H	A	B	A	B	A	B	A	A	B	A	B	A	A	A	B	B	B	B	A	B	A	B	B	B	A	A	A	A	A	B	B	A
Kukri_c55996_63	2B	110.65	765069399	B	A	B	A	B	A	A	B	A	A	B	A	B	H	A	B	A	B	A	B	A	A	B	A	B	A	A	A	B	B	B	B	A	B	A	B	B	B	A	A	A	A	A	B	B	A
RAC875_c5673_1209	2B	110.65	622382798	B	A	B	A	B	A	A	B	A	A	B	A	B	H	A	B	A	B	A	B	A	A	B	A	B	A	A	A	B	B	B	B	A	B	A	B	B	B	A	A	A	A	A	B	B	A
RAC875_c57353_245	2B	110.65	765072016	B	A	B	A	B	A	A	B	A	A	B	A	B	-	A	B	A	B	A	B	A	A	B	A	B	A	A	A	B	B	B	B	A	B	A	B	B	B	A	A	A	A	A	B	B	A
BS00069756_51	2B	111.211		B	A	B	A	B	A	A	H	A	A	B	A	B	H	A	B	A	B	A	B	A	A	B	A	B	A	A	A	B	B	B	B	A	B	A	B	B	B	A	A	A	A	A	B	B	A
IACX5726	2B	111.211		B	A	B	A	B	A	A	B	A	A	B	A	B	A	A	B	A	B	A	B	A	A	B	A	B	A	A	A	B	B	B	B	A	B	A	B	B	B	A	A	A	A	A	B	B	A
RFL_Contig385_761	2B	111.755	767169958	B	A	B	A	B	A	A	B	A	A	B	A	B	B	A	B	A	B	A	B	A	A	B	A	B	A	A	A	B	B	B	B	A	B	A	B	B	B	A	A	A	A	A	B	B	A
Tdurum_contig12159_468	2B	112.298	772053242	B	A	B	A	B	A	A	B	A	A	B	A	B	B	A	B	A	B	A	B	A	A	B	A	B	A	A	A	B	B	B	B	A	B	A	B	B	B	A	A	A	A	A	B	B	A
BS00011276_51	2B	112.854	768548839	H	A	B	A	H	A	A	A	A	A	B	A	B	H	A	B	A	B	A	B	A	A	B	A	H	A	A	A	B	B	-	H	A	B	A	H	B	B	A	A	A	A	A	B	B	A
RAC875_c98387_130	2B	112.854	766233838	B	A	B	A	B	A	A	A	A	A	B	A	B	H	A	B	A	B	A	B	A	A	B	A	B	A	A	A	B	B	B	B	A	B	A	B	B	B	A	A	A	A	A	B	B	A
CAP7_c16_483	2B	122.68	777384902	B	A	B	A	A	B	A	B	A	A	B	A	B	A	A	B	A	B	A	B	A	A	B	A	B	A	A	A	B	A	A	B	A	B	A	B	B	B	A	A	A	B	A	B	B	A
RAC875_c19685_944	2B	122.68	634296165	B	A	B	A	A	B	A	-	A	A	B	A	B	A	A	B	A	B	A	B	A	A	B	A	B	A	A	A	B	A	A	B	A	B	A	B	B	B	A	A	A	B	A	B	B	A
wsnp_Ex_c34303_42642389	2B	122.68	777514133	B	A	B	A	A	B	A	B	A	A	B	A	B	A	A	B	A	B	A	B	A	A	B	A	B	A	A	A	B	A	A	B	A	B	A	B	B	B	A	A	A	B	A	B	B	A
BobWhite_c7274_333	2B	125.59	779344647	B	A	B	A	A	B	A	B	B	A	B	B	B	A	A	B	A	B	A	B	A	A	B	A	B	A	A	A	B	A	A	B	A	B	A	B	B	B	A	A	A	B	A	B	B	A
GENE-1056_55	2B	125.59	635228865	B	A	B	A	A	B	A	B	B	A	B	B	B	A	A	B	A	B	A	B	A	A	B	A	B	A	A	A	B	A	A	B	A	B	A	B	B	B	A	A	A	B	A	B	B	A
Tdurum_contig10048_447	2B	125.59	635229168	B	A	B	A	A	B	A	B	B	A	B	B	B	A	A	B	A	B	A	B	A	A	B	A	B	A	A	A	B	A	A	B	A	B	A	B	B	B	A	A	A	B	A	B	B	A
Tdurum_contig10048_61	2B	125.59	779341273	B	A	B	A	A	B	A	B	B	A	B	B	B	A	A	B	A	B	A	B	A	A	B	A	B	A	A	A	B	A	A	B	A	B	A	B	B	B	A	A	A	B	A	B	B	A
Tdurum_contig52627_496	2B	125.59	779344885	B	A	B	A	A	B	A	B	B	A	B	B	B	A	A	B	A	B	A	B	A	A	B	A	B	A	A	A	B	A	A	B	A	B	A	B	B	B	A	A	A	B	A	B	B	A
IACX7717	2B	127.918		B	A	B	A	A	B	A	H	B	A	B	B	B	A	A	B	A	B	A	B	A	A	B	B	B	A	A	A	B	A	A	B	A	B	A	B	B	B	A	B	A	B	A	B	B	A
wsnp_CAP11_c3226_1588070	2B	127.918		B	A	B	A	A	B	A	B	B	A	B	B	B	A	A	B	A	B	A	B	A	A	B	B	B	A	A	A	B	A	A	B	A	B	A	B	B	B	A	B	A	B	A	B	B	A
BobWhite_c12911_788	2B	129.067		B	A	B	A	A	B	A	B	B	A	B	B	B	A	A	B	A	B	A	B	A	A	B	B	B	A	A	A	A	A	A	B	A	B	A	B	B	B	A	B	A	B	A	A	B	A
CAP11_c1820_244	2B	129.629	782534064	B	A	B	A	A	B	A	B	B	A	B	B	B	A	A	B	A	B	A	B	A	A	B	B	B	A	A	A	A	A	A	B	A	B	A	B	B	B	A	B	A	B	A	A	B	A
Ex_c67202_741	2B	129.629		B	A	B	A	A	B	A	B	B	A	B	B	B	A	A	B	A	B	A	B	A	A	B	B	B	A	A	A	A	A	A	B	A	B	A	B	B	B	A	B	A	B	A	A	B	A
GENE-0918_159	2B	129.629	783446587	B	A	B	A	A	B	A	B	B	A	B	B	B	A	A	B	A	B	A	B	A	A	B	B	B	A	A	A	A	A	A	B	A	B	A	B	B	B	A	B	A	B	A	A	B	A
RAC875_c31214_58	2B	129.629		B	A	B	A	A	B	A	B	B	A	B	B	B	A	A	B	A	B	A	B	A	A	B	B	B	A	A	A	A	A	A	B	A	B	A	B	B	B	A	B	A	B	A	A	B	A
TA002989-0535	2B	129.629	783227417	B	A	B	A	A	B	A	B	B	A	B	B	B	A	A	B	A	B	A	B	A	A	B	B	B	A	A	A	A	A	A	B	A	B	A	B	B	B	A	B	A	B	A	A	B	A
wsnp_Ex_c298_580660	2B	129.629	785138741	B	A	B	A	A	B	A	B	B	A	B	B	B	A	A	B	A	B	A	B	A	A	B	B	B	A	A	A	A	A	A	B	A	B	A	B	B	B	A	B	A	B	A	A	B	A
wsnp_Ex_rep_c103381_88353000	2B	129.629	783228849	B	A	B	A	A	B	A	B	B	A	B	B	B	A	A	B	A	B	A	B	A	A	B	B	B	A	A	A	A	A	A	B	A	B	A	B	B	B	A	B	A	B	A	A	B	A
Excalibur_c8919_345	2B	138.041	789437154	B	A	B	A	A	B	A	A	B	A	B	B	B	A	A	B	A	B	B	B	B	A	B	B	B	A	A	A	A	A	A	B	A	A	A	A	B	B	A	B	A	B	B	B	B	A
Excalibur_c94383_157	2B	138.041	789438902	B	A	B	A	A	B	A	A	B	A	H	B	B	A	A	B	A	B	H	B	B	A	B	B	B	A	A	A	A	A	A	B	A	A	A	A	B	B	A	B	A	B	H	B	B	A
Kukri_c3501_1175	2B	138.041	789437020	B	A	B	A	A	B	A	A	B	A	H	B	B	A	A	B	A	B	H	B	B	A	B	B	B	A	A	A	A	A	A	B	A	A	A	A	B	B	A	B	A	B	H	B	B	A
BS00065264_51	2B	150.03	765665491	A	A	A	A	A	B	A	A	H	B	A	B	B	A	H	B	A	B	H	B	B	A	B	B	B	A	A	A	A	B	B	B	B	A	A	A	B	B	A	B	A	B	H	A	B	A
Excalibur_rep_c105614_172	2B	150.632	764100713	A	A	A	A	A	B	A	A	H	B	A	B	B	A	H	B	A	B	H	B	B	A	B	B	B	A	A	A	A	B	B	B	B	A	A	A	B	B	A	B	A	B	H	A	B	A
Kukri_c900_1334	2B	150.632	796807546	A	A	A	A	A	B	A	A	H	B	A	B	B	A	H	B	A	B	H	B	B	A	B	B	B	A	A	A	A	B	B	B	B	A	A	A	B	B	A	B	A	B	H	A	B	A
RAC875_c19042_2102	2B	150.632	638134282	A	A	A	A	A	B	A	A	H	B	A	B	B	A	H	B	A	B	H	B	B	A	B	B	B	A	A	A	A	B	B	B	B	A	A	A	B	B	A	B	A	B	H	A	B	A
wsnp_Ex_c25043_34305764	2B	150.632	797334004	A	A	A	A	A	B	A	A	H	B	A	B	B	A	H	B	A	B	-	B	B	A	B	B	B	A	A	A	A	B	B	B	B	A	A	A	B	B	A	B	A	B	H	A	B	A
wsnp_Ex_rep_c80588_75758453	2D	0	8717330	A	A	B	B	A	A	A	A	A	B	B	B	A	A	A	B	A	B	B	A	B	A	B	B	B	A	A	A	B	B	B	A	A	A	A	A	B	A	A	A	A	B	A	B	A	B
TA010191-1338	2D	3.6208		A	A	B	B	A	A	A	A	A	B	B	B	A	A	A	B	A	B	B	A	B	A	A	A	B	A	H	A	A	B	B	A	A	A	H	A	B	A	A	A	A	B	A	B	A	H
BS00023099_51	2D	4.1764	11477071	A	A	B	B	A	A	A	A	A	B	B	B	A	A	A	B	A	B	B	A	B	A	A	A	B	A	H	A	A	B	B	A	A	A	H	A	B	A	A	A	A	B	A	B	A	H
TA022134-0255	2D	4.1764		A	A	B	B	A	A	A	A	A	B	B	B	A	A	A	B	A	B	B	A	B	A	A	A	B	A	H	A	A	B	B	A	A	A	H	A	B	A	A	A	A	B	A	B	A	H
BobWhite_c11022_78	2D	4.7382	12291432	A	A	B	B	A	A	A	A	A	B	B	B	A	A	A	B	A	B	B	A	B	A	A	A	B	A	A	A	A	B	B	A	A	A	A	A	B	A	A	A	A	B	A	B	A	H
Kukri_c30439_2407	2D	4.7382	12329606	A	A	B	B	A	A	A	A	A	B	B	B	A	A	A	B	A	B	B	A	B	A	A	A	B	A	A	A	A	B	B	A	A	A	A	A	B	A	A	A	A	B	A	B	A	A
Kukri_c36139_292	2D	4.7382	12692911	A	A	B	B	A	A	A	A	A	B	B	B	A	A	A	B	A	B	B	A	B	A	A	A	B	A	H	A	A	B	B	A	A	A	A	A	B	A	A	A	A	B	A	B	A	H
Tdurum_contig77522_310	2D	4.7382	12697325	A	A	B	B	A	A	A	A	A	B	B	B	A	A	A	B	A	B	B	A	B	A	A	A	B	A	-	A	A	B	B	A	A	A	-	A	B	A	A	A	A	B	A	B	A	-
BS00022957_51	2D	5.2937	12786080	A	A	B	B	A	A	A	A	A	B	B	B	A	A	A	B	A	B	B	A	B	A	A	A	B	A	H	A	A	B	B	A	A	A	H	A	B	A	A	A	A	B	A	B	A	H
Excalibur_c60081_474	2D	5.2937	21912494	A	A	B	B	A	A	A	A	A	B	B	B	A	A	A	B	A	B	B	A	B	A	A	A	B	A	H	A	A	B	B	A	A	A	H	A	B	A	A	A	A	B	A	B	A	H
GENE-1298_98	2D	5.2937	12689645	A	A	B	B	A	A	A	A	A	B	B	B	A	A	A	B	A	B	B	A	B	A	A	A	B	A	H	A	A	B	B	A	A	A	H	A	B	A	A	A	A	B	A	B	A	H
TA001604-0648	2D	5.2938		A	A	B	B	A	A	A	-	A	B	B	B	A	A	A	B	A	B	B	A	B	A	A	A	B	A	-	A	A	B	B	A	A	A	-	A	B	A	A	A	A	B	A	B	A	B
BS00071755_51	2D	8.829	15115181	A	A	A	B	A	A	A	A	A	B	B	B	A	A	A	B	A	B	B	A	B	A	A	A	B	A	H	A	A	A	A	A	A	A	H	A	B	A	A	A	A	B	A	B	A	-
D_F1BEJMU02GB94Z_188	2D	8.829	15194290	A	A	A	B	A	A	A	-	A	B	B	B	A	A	A	B	A	B	B	A	B	A	A	A	B	A	H	A	A	A	A	A	A	A	H	A	B	A	A	A	A	B	A	B	A	H
RAC875_c52926_871	2D	8.829	27728467	A	A	A	B	A	A	A	A	A	B	B	B	A	A	A	B	A	B	B	A	B	A	A	A	B	A	H	A	A	A	A	A	A	A	H	A	B	A	A	A	A	B	A	B	A	H
TA006853-0521	2D	8.829		A	A	A	B	A	A	A	A	A	B	B	B	A	A	A	B	A	B	B	A	B	A	A	A	B	A	B	A	A	A	A	A	A	A	B	A	B	A	A	A	A	B	A	B	A	B
TA006853-0531	2D	8.829		A	A	A	B	A	A	A	A	A	B	B	B	A	A	A	B	A	B	B	A	B	A	A	A	B	A	H	A	A	A	A	A	A	A	H	A	B	A	A	A	A	B	A	B	A	H
D_F1BEJMU01A0OMY_356	2D	9.9528		A	A	A	B	A	A	A	H	A	B	B	B	A	A	A	B	A	B	B	A	B	A	A	A	B	A	H	A	A	A	A	A	A	A	A	A	B	A	A	A	A	B	A	B	A	H
Kukri_c19434_936	2D	9.9528		A	A	A	B	A	A	A	A	A	B	B	B	A	A	A	B	A	B	B	A	B	A	A	A	B	A	A	A	A	A	A	A	A	A	A	A	B	A	A	A	A	B	A	B	A	-
wsnp_Ex_c58019_59494143	2D	9.9528		A	A	A	B	A	A	A	A	A	B	B	B	A	A	A	B	A	B	B	A	B	A	A	A	B	A	H	A	A	A	A	A	A	A	A	A	B	A	A	A	A	B	A	B	A	H
wsnp_Ex_c7908_13430703	2D	9.9528		A	A	A	B	A	A	A	H	A	B	B	B	A	A	A	B	A	B	B	A	B	A	A	A	B	A	H	A	A	A	A	A	A	A	A	A	B	A	A	A	A	B	A	B	A	H
BS00029208_51	2D	11.1024	14897946	A	A	A	B	A	A	A	A	A	B	B	B	A	A	A	B	A	B	B	A	B	A	A	A	B	A	H	A	A	A	A	A	A	A	A	A	B	A	A	A	A	B	A	B	A	H
BS00067698_51	2D	11.1024	14860398	A	A	A	B	A	A	A	A	A	B	B	B	A	A	A	B	A	B	B	A	B	A	A	A	B	A	H	A	A	A	A	A	A	A	A	A	B	A	A	A	A	B	A	B	A	H
D_contig16084_234	2D	11.1024	14779053	A	A	A	B	A	A	A	A	A	B	B	B	A	A	A	B	A	B	B	A	B	A	A	A	B	A	H	-	A	A	A	A	A	A	A	A	B	A	A	A	A	B	A	B	A	H
wsnp_CAP7_c888_455397	2D	11.1024	14778714	A	A	A	B	A	A	A	A	A	B	B	B	A	A	A	B	A	B	B	A	B	A	A	A	B	A	H	A	A	A	A	A	A	A	A	A	B	A	A	A	A	B	A	B	A	H
BS00047901_51	2D	11.6642	15967398	A	A	A	B	A	A	A	A	A	B	B	B	A	A	A	B	A	B	B	A	B	A	A	A	B	A	H	A	A	A	A	A	A	A	H	A	B	A	A	A	A	B	A	B	A	-
Tdurum_contig29563_257	2D	11.6642	28339840	A	A	A	B	A	A	A	A	A	B	B	B	A	A	A	B	A	B	B	A	B	A	A	A	B	A	H	A	A	A	A	H	A	A	H	A	B	A	A	A	A	B	A	B	A	H
JD_c63957_1176	2D	16.8778	20769354	A	A	A	B	A	A	A	A	A	B	B	B	A	B	A	B	B	B	B	A	A	A	A	A	H	A	H	A	A	A	H	H	A	A	H	A	B	A	A	A	A	A	A	A	A	H
BS00022900_51	2D	22.8268	27651274	A	A	A	B	B	B	A	A	A	B	H	B	A	B	A	A	B	B	B	A	A	A	A	A	A	B	H	A	A	A	A	B	A	A	H	A	B	A	A	B	A	A	A	A	A	H
BS00097126_51	2D	22.8268	27651376	A	A	A	B	B	B	A	-	A	B	H	B	A	B	A	A	B	B	B	A	A	A	A	A	A	B	H	A	A	A	A	B	A	A	H	A	B	A	A	B	A	A	A	A	A	H
GENE-0717_28	2D	22.8268	29104393	A	A	A	B	B	B	A	A	A	B	-	B	A	B	A	A	B	B	B	A	A	A	A	A	A	B	-	A	A	A	A	B	A	A	-	A	B	A	A	B	A	A	A	A	A	-
IAAV3173	2D	69.7694		B	B	B	A	B	B	A	A	A	A	A	A	A	B	B	B	B	A	B	A	B	A	A	B	B	B	A	-	A	A	A	A	A	B	B	B	A	B	B	B	A	A	A	B	B	A
BS00063674_51	2D	70.3441		B	B	B	A	B	B	A	A	A	A	A	A	A	B	B	B	B	A	B	A	B	A	A	B	B	B	A	B	A	A	A	A	A	B	B	B	A	B	B	B	A	A	A	B	B	A
BS00069899_51	2D	70.3441	66461532	B	B	B	A	B	B	A	-	A	A	A	A	A	B	B	B	B	A	B	A	B	A	A	B	B	B	A	B	A	A	A	A	A	B	B	B	A	B	B	B	A	A	A	B	B	A
BS00073230_51	2D	70.3441		B	B	B	A	B	B	A	A	A	A	A	A	A	B	B	B	B	A	B	A	B	A	A	B	B	B	A	B	A	A	A	A	A	B	B	B	A	B	B	B	A	A	A	B	B	A
GENE-0787_549	2D	70.3441	104239416	B	B	B	A	B	B	A	A	A	A	A	A	A	B	B	B	B	A	B	A	B	A	A	B	B	B	A	-	A	A	A	A	A	B	B	B	A	B	B	B	A	A	A	B	B	A
Excalibur_c4303_206	2D	70.9059	101236629	B	B	B	A	B	B	A	A	A	A	A	A	A	B	B	B	B	A	B	A	B	A	A	B	B	B	A	A	A	A	A	A	A	B	B	B	A	B	B	B	A	A	A	B	B	A
D_contig31797_313	2D	71.4741	63555521	B	B	B	A	B	B	A	A	A	A	A	A	A	B	B	B	B	A	B	B	B	A	A	B	B	B	A	H	A	A	A	A	A	B	B	B	A	B	B	B	A	A	A	B	B	A
wsnp_Ex_c6400_11123059	2D	71.4741	62957090	B	B	B	A	B	B	A	A	A	A	A	A	A	B	B	B	B	A	B	B	B	A	A	B	B	B	A	H	A	A	A	A	A	B	B	B	A	B	B	B	A	A	A	B	B	A
BobWhite_c36072_272	2D	72.0489		B	B	B	A	B	B	A	A	A	A	A	A	A	B	B	B	B	A	B	A	B	A	A	B	B	B	A	H	A	A	A	A	A	B	B	B	A	B	B	B	A	A	A	B	B	A
BobWhite_c47086_539	2D	72.0489	105913246	B	B	B	A	B	B	A	A	A	A	A	A	A	B	B	B	B	A	B	A	B	A	A	B	B	B	A	H	A	A	A	A	A	B	B	B	A	B	B	B	A	A	A	B	B	A
BS00010514_51	2D	72.0489	104579560	B	B	B	A	B	B	A	-	A	A	A	A	A	B	B	B	B	A	B	A	B	A	A	B	B	B	A	H	A	A	A	A	A	B	B	B	A	B	B	B	A	A	A	B	B	A
BS00021923_51	2D	72.0489	104578598	B	B	B	A	B	B	A	A	A	A	A	A	A	B	B	B	B	A	B	A	B	A	A	B	B	B	A	H	A	A	A	A	A	B	B	B	A	B	B	B	A	A	A	B	B	A
BS00062864_51	2D	72.0489		B	B	B	A	B	B	A	A	A	A	A	A	A	B	B	B	B	A	B	A	B	A	A	B	B	B	A	H	A	A	A	A	A	B	B	B	A	B	B	B	A	A	A	B	B	A
BS00065147_51	2D	72.0489		B	B	B	A	B	B	A	A	A	A	A	A	A	B	B	B	B	A	B	A	B	A	A	B	B	B	A	H	A	A	A	A	A	B	B	B	A	B	B	B	A	A	A	B	B	A
BS00065701_51	2D	72.0489		B	B	B	A	B	B	A	A	A	A	A	A	A	B	B	B	B	A	B	A	B	A	A	B	B	B	A	H	A	A	A	A	A	B	B	B	A	B	B	B	A	A	A	B	B	A
BS00073229_51	2D	72.0489		B	B	B	A	B	B	A	A	A	A	A	A	A	B	B	B	B	A	B	A	B	A	A	B	B	B	A	H	A	A	A	A	A	B	B	B	A	B	B	B	A	A	A	B	B	A
BS00080749_51	2D	72.0489	72171466	B	B	B	A	B	B	A	-	A	A	A	A	A	B	B	B	B	A	B	A	B	A	A	B	B	B	A	H	A	A	A	A	A	B	B	B	A	B	B	B	A	A	A	B	B	A
BS00081578_51	2D	72.0489	67552821	B	B	B	A	B	B	A	A	A	A	A	A	A	B	B	B	B	A	B	A	B	A	A	B	B	B	A	H	A	A	A	A	A	B	B	B	A	B	B	B	A	A	A	B	B	A
BS00106937_51	2D	72.0489	68733925	B	B	B	A	B	B	A	A	A	A	A	A	A	B	B	B	B	A	B	A	B	A	A	B	B	B	A	H	A	A	A	A	A	B	B	B	A	B	B	B	A	A	A	B	B	A
IAAV691	2D	72.0489	107380136	B	B	B	A	B	B	A	A	A	A	A	A	A	B	B	B	B	A	B	A	B	A	A	B	B	B	A	-	A	A	A	A	A	B	B	B	A	B	B	B	A	A	A	B	B	A
Kukri_c1016_2269	2D	72.0489	67231105	B	B	B	A	B	B	A	A	A	A	A	A	A	B	B	B	B	A	B	A	B	A	A	B	B	B	A	H	A	A	A	A	A	B	B	B	A	B	B	B	A	A	A	B	B	A
Kukri_c4790_1174	2D	72.0489	69504871	B	B	B	A	B	B	A	A	A	A	A	A	A	B	B	B	B	A	B	A	B	A	A	B	B	B	A	H	A	A	A	A	A	B	B	B	A	B	B	B	A	A	A	B	B	A
Kukri_rep_c114322_506	2D	72.0489	67967527	B	B	B	A	B	B	A	A	A	A	A	A	A	B	B	B	B	A	B	A	B	A	A	B	B	B	A	H	A	A	A	A	A	B	B	B	A	B	B	B	A	A	A	B	B	A
RAC875_rep_c116200_396	2D	72.0489		B	B	B	A	B	B	A	H	A	A	A	A	A	B	B	B	B	A	B	A	B	-	A	B	B	B	A	H	A	A	A	A	A	B	B	B	A	B	B	B	A	A	A	B	B	-
BS00022211_51	2D	72.6442	73023918	B	B	B	A	B	B	A	A	A	A	A	A	A	B	A	B	B	A	B	A	B	A	A	B	B	B	A	H	A	A	A	A	A	B	B	B	A	B	B	B	A	A	A	B	B	A
BS00063710_51	2D	72.6442	111663938	B	B	B	A	B	B	A	A	A	A	A	A	A	B	A	B	B	A	B	A	B	A	A	B	B	B	A	H	A	A	A	A	A	B	B	B	A	B	B	B	A	A	A	B	B	A
Excalibur_c22315_894	2D	72.6442	110481540	B	B	B	A	B	B	A	H	A	A	A	A	A	B	A	B	B	A	B	A	B	A	A	B	B	B	A	H	A	A	A	A	A	B	B	B	A	B	B	B	A	A	A	B	B	A
Excalibur_c2887_131	2D	72.6442	73019422	B	B	B	A	B	B	A	A	A	A	A	A	A	B	A	B	B	A	B	A	B	A	A	B	B	B	A	H	A	A	A	A	A	B	B	B	A	B	B	B	A	A	A	B	B	A
RAC875_rep_c114236_188	2D	72.6442	73572961	B	B	B	A	B	B	A	A	A	A	A	A	A	B	A	B	B	A	B	A	B	A	A	B	B	B	A	H	A	A	A	A	A	B	B	B	A	B	B	B	A	A	A	B	B	A
TA008254-1297	2D	72.6442		B	B	B	A	B	B	A	-	A	A	A	A	A	B	A	B	B	A	B	A	B	A	A	B	B	B	A	H	A	A	A	A	A	B	B	B	A	B	B	B	A	A	A	B	B	A
BS00063517_51	2D	73.2189	74938353	B	B	B	A	B	B	A	A	A	A	A	A	A	B	A	B	B	A	B	A	B	A	A	B	B	B	A	H	A	A	A	A	A	B	B	B	A	B	B	B	A	A	A	B	B	A
BobWhite_rep_c51612_864	2D	73.7937	77132677	B	B	B	A	B	B	A	A	A	A	A	A	A	B	A	B	B	A	B	A	B	A	A	B	B	A	A	H	A	A	A	A	A	B	B	B	A	B	B	B	A	A	A	B	B	A
BS00044720_51	2D	73.7937		B	B	B	A	B	B	A	A	A	A	A	A	A	B	A	B	B	A	B	A	B	A	A	B	B	A	A	H	A	A	A	A	A	B	B	B	A	B	B	B	A	A	A	B	B	A
BS00063225_51	2D	73.7937	78379853	B	B	B	A	B	B	A	H	A	A	A	A	A	B	A	B	B	A	B	A	B	A	A	B	B	A	A	H	A	A	A	A	A	B	B	B	A	B	B	B	A	A	A	B	B	A
BS00063748_51	2D	73.7937		B	B	B	A	B	B	A	A	A	A	A	A	A	B	A	B	B	A	B	A	B	A	A	B	B	A	A	H	A	A	A	A	A	B	B	B	A	B	B	B	A	A	A	B	B	A
BS00076261_51	2D	73.7937		B	B	B	A	B	B	A	A	A	A	A	A	A	B	A	B	B	A	B	A	B	A	A	B	B	A	A	H	A	A	A	A	A	B	B	B	A	B	B	B	A	A	A	B	B	A
BS00082604_51	2D	73.7937	78392291	B	B	B	A	B	B	A	A	A	A	A	A	A	B	A	B	B	A	B	A	B	A	A	B	B	A	A	H	A	A	A	A	A	B	B	B	A	B	B	B	A	A	A	B	B	A
BS00082605_51	2D	73.7937		-	B	B	A	B	B	A	A	A	A	A	A	A	B	A	B	B	A	B	A	B	A	A	B	B	A	A	H	A	A	A	A	A	B	B	B	A	B	B	B	A	A	A	B	B	A
D_contig77859_59	2D	73.7937	78692295	B	B	B	A	B	B	A	A	A	A	A	A	A	B	A	B	B	A	B	A	B	A	A	B	B	A	A	H	A	A	A	A	A	B	B	B	A	B	B	B	A	A	A	B	B	A
IAAV6312	2D	73.7937	122695624	B	B	B	A	B	B	A	A	A	A	A	A	A	B	A	B	B	A	B	A	B	A	A	B	B	A	A	H	A	A	A	A	A	B	B	B	A	B	B	B	A	A	A	B	B	A
Kukri_c16557_855	2D	73.7937	76007955	B	B	B	A	B	B	A	A	A	A	A	A	A	B	A	B	B	A	B	A	B	A	A	B	B	A	A	H	A	A	A	A	A	B	B	B	A	B	B	B	A	A	A	B	B	A
Kukri_rep_c72558_961	2D	73.7937	76897086	B	B	B	A	B	B	A	A	A	A	A	A	A	B	A	B	B	A	B	A	B	A	A	B	B	A	A	H	A	A	A	A	A	B	B	B	A	B	B	B	A	A	A	B	B	A
RAC875_c26896_339	2D	73.7937	76899647	B	B	B	A	B	B	A	A	A	A	A	A	A	B	A	B	B	A	B	A	B	A	A	B	B	A	A	H	A	A	A	A	A	B	B	B	A	B	B	B	A	A	A	B	B	A
RAC875_c31493_120	2D	73.7937	78692489	B	B	B	A	B	B	A	A	A	A	A	A	A	B	A	B	B	A	B	A	B	A	A	B	B	A	A	H	A	A	A	A	A	B	B	B	A	B	B	B	A	A	A	B	B	A
RAC875_c31560_141	2D	73.7937	76761267	B	B	B	A	B	B	A	A	A	A	A	A	A	B	A	B	B	A	B	A	B	A	A	B	B	A	A	H	A	A	A	A	A	B	B	B	A	B	B	B	A	A	A	B	B	A
RAC875_c45702_412	2D	73.7937		B	B	B	A	B	B	A	A	A	A	A	A	A	B	A	B	B	A	B	A	B	A	A	B	B	A	A	H	A	A	A	A	A	B	B	B	A	B	B	B	A	A	A	B	B	A
RAC875_rep_c103893_601	2D	73.7937	76860548	B	B	B	A	B	B	A	-	A	A	A	A	A	B	A	B	B	A	B	A	B	A	A	B	B	A	A	H	A	A	A	A	A	B	B	B	A	B	B	B	A	A	A	B	B	A
RAC875_rep_c72220_143	2D	73.7937	78562339	B	B	B	A	B	B	A	A	A	A	A	A	A	B	A	B	B	A	B	A	B	A	A	B	B	A	A	H	A	A	A	A	A	B	B	B	A	B	B	B	A	A	A	B	B	A
wsnp_BE488779D_Ta_1_2	2D	73.7937	76639778	B	B	B	A	B	B	A	A	A	A	A	A	A	B	A	B	B	A	B	A	B	A	A	B	B	A	A	H	A	A	A	A	A	B	B	B	A	B	B	B	A	A	A	B	B	A
BS00021718_51	2D	78.8744		B	B	B	A	B	B	A	A	A	A	A	A	A	B	A	B	B	B	B	A	B	B	B	B	B	A	A	H	A	A	A	A	A	B	B	A	A	B	B	B	B	A	A	B	B	A
BS00043082_51	2D	78.8744	83827394	B	B	B	A	B	B	A	A	A	A	A	A	A	B	A	B	B	B	B	A	B	B	B	B	B	A	A	H	A	A	A	A	A	B	B	A	A	B	B	B	B	A	A	B	B	A
BS00065946_51	2D	78.8744	81942716	B	B	B	A	B	B	A	A	A	A	A	A	A	B	A	B	B	B	B	A	B	B	B	B	B	A	A	H	A	A	A	A	A	B	B	A	A	B	B	B	B	A	A	B	B	A
BS00080239_51	2D	78.8744	82185677	B	B	B	A	B	B	A	A	A	A	A	A	A	B	A	B	B	B	B	A	B	B	B	B	B	A	A	H	A	A	A	A	A	B	B	A	A	B	B	B	B	A	A	B	B	A
BS00083504_51	2D	78.8744	81327490	B	B	B	A	B	B	A	A	A	A	A	A	A	B	A	B	B	B	B	A	B	B	B	B	B	A	A	H	A	A	A	A	A	B	B	A	A	B	B	B	B	A	A	B	B	A
D_contig25212_98	2D	78.8744	83931269	B	B	B	A	B	B	A	A	A	A	A	A	A	B	A	B	B	B	B	A	B	B	B	B	B	A	A	H	A	A	A	A	A	B	B	A	A	B	B	B	B	A	A	B	B	A
IAAV4282	2D	78.8744	82108241	B	B	B	A	B	B	A	A	A	A	A	A	A	B	A	B	B	B	B	A	B	B	B	B	B	A	A	-	A	A	A	A	A	B	B	A	A	B	B	B	B	A	A	B	B	A
IACX5670	2D	78.8744	83142083	B	B	B	A	B	B	A	A	A	A	A	A	A	B	A	B	B	B	B	A	B	B	B	B	B	A	A	H	A	A	A	A	A	B	B	A	A	B	B	B	B	A	A	B	B	A
Kukri_c49670_857	2D	78.8744	81299077	B	B	B	A	B	B	A	A	A	A	A	A	A	B	A	B	B	B	B	A	B	B	B	B	B	A	A	H	A	A	A	A	A	B	B	A	A	B	B	B	B	A	A	B	B	A
RAC875_c46007_340	2D	78.8744	81305621	B	B	B	A	B	B	A	A	A	A	A	A	A	B	A	B	B	B	B	A	B	B	B	B	B	A	A	H	A	A	A	A	A	B	B	A	A	B	B	B	B	A	A	B	B	A
RFL_Contig5917_2433	2D	78.8744	83165430	B	B	B	A	B	B	A	H	A	A	A	A	A	B	A	B	B	B	B	A	B	B	B	B	B	A	A	H	A	A	A	A	A	B	B	A	A	B	B	B	B	A	A	B	B	A
RFL_Contig5917_3026	2D	78.8744		B	B	B	A	B	B	A	A	A	A	A	A	A	B	A	B	B	B	B	A	B	B	B	B	B	A	A	H	A	A	A	A	A	B	B	A	A	B	B	B	B	A	A	B	B	A
TA001366-0072	2D	78.8744	81767694	B	B	B	A	B	B	A	A	A	A	A	A	A	B	A	B	B	B	B	A	B	B	B	B	B	A	A	A	A	A	A	A	A	B	B	A	A	B	B	B	B	A	A	B	B	A
wsnp_BE444144D_Ta_1_1	2D	78.8744	80730927	B	B	B	A	B	B	A	A	A	A	A	A	A	B	A	B	B	B	B	A	B	B	B	B	B	A	A	H	A	A	A	A	A	B	B	A	A	B	B	B	B	A	A	B	B	A
Excalibur_c16329_493	2D	127.522	634296684	B	A	B	A	B	A	A	B	A	B	B	B	B	B	B	A	A	B	B	B	A	B	A	A	B	A	B	B	A	B	B	A	A	A	A	A	B	A	B	A	B	A	A	B	B	A
RFL_Contig2862_1287	2D	130.399	648284611	B	A	B	A	B	A	A	B	A	B	B	B	B	B	B	A	A	B	B	B	A	B	A	A	B	A	B	B	A	B	A	A	B	A	A	A	B	A	B	A	B	B	A	B	B	A
BS00015680_51	2D	133.276	650322728	B	A	B	A	B	B	A	B	A	B	B	B	B	B	B	A	A	B	A	B	A	A	A	A	B	B	B	B	A	H	A	A	H	A	A	A	B	A	B	A	B	B	A	B	B	A
Excalibur_rep_c67599_2154	2D	133.276	650325273	B	A	B	A	B	B	A	H	A	B	B	B	B	B	B	A	A	B	A	B	A	A	A	A	B	B	B	B	A	H	A	A	-	A	A	A	B	A	B	A	B	B	A	B	B	A
Excalibur_rep_c67599_242	2D	133.276	650327136	B	A	B	A	B	B	A	H	A	B	B	B	B	B	B	A	A	B	A	B	A	A	A	A	B	B	B	B	A	H	A	A	H	A	A	A	B	A	B	A	B	B	A	B	B	A
IAAV6032	2D	133.276	786229351	B	A	B	A	B	B	A	H	A	B	B	B	B	B	B	A	A	B	A	B	A	A	A	A	B	B	B	B	A	H	A	A	H	A	A	A	B	A	B	A	B	B	A	B	B	A
RAC875_c3187_873	2D	133.276		B	A	B	A	B	B	A	B	A	B	B	B	B	B	B	A	A	B	A	B	A	A	A	A	B	B	B	B	A	B	A	A	-	A	A	A	B	A	B	A	B	B	A	B	B	A
IAAV9128	2D	136.256	647970525	B	A	B	A	B	A	A	B	A	B	B	B	B	B	B	A	A	B	B	B	A	B	A	A	B	A	B	B	A	H	A	A	H	A	A	A	B	A	B	A	B	H	A	B	B	A
RAC875_c4851_1600	2D	136.256	648112753	B	A	B	A	B	A	A	B	A	B	B	B	B	B	B	A	A	B	B	B	A	B	A	A	B	A	B	B	A	H	A	A	H	A	A	A	B	A	B	A	B	H	A	B	B	A
Ex_c27573_760	2D	137.432	634472526	B	A	B	A	B	A	A	H	A	B	B	B	B	B	B	A	A	B	B	B	A	B	A	A	B	A	B	B	A	B	B	A	H	A	A	A	B	A	B	A	B	H	A	B	B	A
Kukri_c26697_366	2D	137.432	779674053	B	A	B	A	B	A	A	-	-	B	B	B	B	B	B	A	A	B	B	B	A	B	A	A	B	A	B	B	A	B	B	A	H	A	-	H	B	A	B	A	B	H	-	B	B	A
RAC875_c9897_638	2D	137.432	634433553	B	A	B	A	B	A	A	B	A	B	B	B	B	B	B	A	A	B	B	B	A	B	A	A	B	A	B	B	A	B	B	A	H	A	A	A	B	A	B	A	B	H	A	B	B	A
D_contig36004_217	2D	137.432	634870057	B	A	B	A	B	A	A	B	A	B	B	B	B	B	B	A	A	B	B	B	A	B	A	A	B	A	B	B	A	B	B	A	H	A	A	A	B	A	B	A	B	H	A	B	B	A
Excalibur_c6681_580	2D	141.922	628937584	B	A	B	B	B	A	A	B	A	B	A	B	B	B	B	A	A	B	B	B	A	B	A	A	B	A	B	B	A	B	B	A	B	A	A	B	B	A	B	-	B	-	A	A	B	A
RFL_Contig2656_871	2D	148.294	753540797	B	A	B	B	B	A	A	H	A	B	A	B	B	B	A	B	B	B	B	B	A	B	A	A	B	B	B	B	A	B	B	A	B	A	A	B	B	A	H	A	B	B	B	A	B	H
RAC875_c52165_241	2D	150.243	613104188	B	A	B	B	B	A	A	H	A	H	B	B	A	B	A	B	-	B	-	B	A	B	A	A	B	B	B	-	A	B	B	A	B	A	A	B	B	A	H	A	B	A	B	A	B	B
BobWhite_c32336_198	2D	150.919	605711406	B	A	B	B	B	A	A	H	A	B	B	B	A	B	A	B	B	B	B	B	A	B	A	A	B	B	B	B	A	B	B	A	B	A	A	B	B	A	H	A	B	A	B	A	B	B
BobWhite_c32336_504	2D	150.919	605711803	B	A	B	B	B	A	A	H	A	B	B	B	A	B	A	B	B	B	B	B	A	B	A	A	B	B	B	B	A	B	B	A	B	A	A	B	B	A	H	A	B	A	B	A	B	B
Kukri_c14696_214	2D	150.919	600298361	B	A	B	B	B	A	A	H	A	B	B	B	A	B	A	B	B	B	B	B	A	B	A	A	B	B	B	B	A	B	B	A	B	A	A	B	B	A	H	A	B	A	B	A	B	B
RAC875_c10218_944	2D	150.919	722633928	B	A	B	B	B	A	A	H	A	B	B	B	A	B	A	B	B	B	B	B	A	B	A	A	B	B	B	B	A	B	B	A	B	A	A	B	B	A	H	A	B	A	B	A	B	B
RAC875_c32340_462	2D	150.919	710979311	B	A	B	B	B	A	A	H	A	B	B	B	A	B	A	B	B	B	B	B	A	B	A	A	B	B	B	B	A	B	B	A	B	A	A	B	B	A	H	A	B	A	B	A	B	B
RAC875_c48856_177	2D	150.919	580005127	B	A	B	B	B	A	A	H	A	B	B	B	A	B	A	B	B	B	B	B	A	B	A	A	B	B	B	B	A	B	B	A	B	A	A	B	B	A	H	A	B	A	B	A	B	B
TA001249-1083	2D	150.919	595164961	B	A	B	B	B	A	A	H	A	B	B	B	A	B	A	B	B	B	B	B	A	B	A	A	B	B	B	B	A	B	B	A	B	A	A	B	B	A	H	A	B	A	B	A	B	B
wsnp_BE517946D_Ta_1_2	2D	150.919	588797887	B	A	B	B	B	A	A	H	A	B	B	B	A	B	A	B	B	B	B	B	A	B	A	A	B	B	B	B	A	B	B	A	B	A	A	B	B	A	H	A	B	A	B	A	B	B
GENE-1016_565	2D	150.919	587292505	B	A	B	B	B	A	A	-	A	B	B	B	A	B	A	B	B	B	B	B	A	B	A	A	B	B	B	-	A	B	B	A	-	A	A	-	B	A	H	A	-	A	B	A	-	B
Excalibur_c44325_92	2D	151.481	608198626	B	A	B	B	B	A	A	H	A	B	B	B	A	B	A	B	B	B	B	B	A	B	A	A	B	B	B	B	A	B	B	A	B	A	A	B	B	A	H	A	B	A	B	A	B	B
RFL_Contig2460_547	2D	151.481	612341552	B	A	B	B	B	A	A	A	A	B	B	B	A	B	A	B	B	B	B	B	A	B	A	A	B	B	B	B	A	B	B	A	B	A	A	B	B	A	H	A	B	A	B	A	B	B
TA006409-1296	2D	151.481		B	A	B	B	B	A	A	H	A	B	B	B	A	B	A	B	B	B	B	B	A	B	A	A	B	B	B	B	A	B	B	A	B	A	A	B	B	A	H	A	B	A	B	A	B	B
wsnp_BE426620D_Ta_2_2	2D	151.481	610289339	B	A	B	B	B	A	A	H	A	B	B	B	A	B	A	B	B	B	B	B	A	B	A	A	B	B	B	B	A	B	B	A	B	A	A	B	B	A	H	A	B	A	B	A	B	B
Kukri_rep_c73433_61	2D	152.036	598714669	B	A	B	B	B	A	A	A	A	B	B	B	A	B	A	B	B	B	B	B	A	B	A	A	B	B	B	B	A	B	B	A	B	A	A	B	B	A	-	A	B	A	B	A	B	B
Tdurum_contig10246_1749	2D	152.036	720576358	B	A	B	B	B	A	A	A	A	B	B	B	A	B	A	B	B	B	B	B	A	B	A	A	B	B	B	B	A	B	B	A	B	A	A	B	B	A	H	A	B	A	B	A	B	B
BS00065717_51	2D	152.592	582490175	B	A	B	B	B	A	A	B	A	B	B	B	A	B	A	B	B	B	B	B	A	B	A	A	B	B	B	B	A	B	B	A	B	A	A	B	B	A	A	A	B	A	B	A	B	B
GENE-0684_1611	2D	152.592		B	A	B	B	B	A	A	B	A	B	B	B	A	B	A	B	B	B	B	B	A	B	A	A	B	B	B	B	A	B	B	A	B	A	A	B	B	A	A	A	B	A	B	A	B	B
RAC875_s116170_295	2D	152.592	600977578	B	A	B	B	B	A	A	B	A	B	B	B	A	B	A	B	B	B	B	B	A	B	A	A	B	B	B	B	A	B	B	A	B	A	A	B	B	A	A	A	B	A	B	A	B	B
TA014111-0612	2D	152.592	122266002	B	A	B	B	B	A	A	B	A	B	B	B	A	B	A	B	B	B	B	B	A	B	A	A	B	B	B	B	A	B	B	A	B	A	A	B	B	A	A	A	B	A	B	A	B	B
GENE-0638_732	2D	153.728	593274763	B	A	B	B	B	A	A	A	A	B	B	B	A	B	A	B	B	B	B	B	A	B	A	A	B	B	B	-	A	B	B	A	B	A	A	B	B	A	A	A	B	A	B	A	B	B
BobWhite_c12090_117	2D	155.453	725346975	B	A	B	B	B	A	A	B	A	B	B	B	A	B	A	B	B	B	B	B	A	B	A	A	B	B	B	B	A	B	B	A	B	A	A	B	B	A	H	A	B	A	B	A	B	B
BobWhite_c16917_732	2D	155.453	702726046	B	A	B	B	B	A	A	B	A	B	B	B	A	B	A	B	B	B	B	B	A	B	A	A	B	B	B	B	A	B	B	A	B	A	A	B	B	A	H	A	B	A	B	A	B	B
BobWhite_c27617_294	2D	155.453	590242165	B	A	B	B	B	A	A	B	A	B	B	B	A	B	A	B	B	B	B	B	A	B	A	A	B	B	B	B	A	B	B	A	B	A	A	B	B	A	-	A	B	A	B	A	B	B
BobWhite_c28250_220	2D	155.453	596911721	B	A	B	B	B	A	A	B	A	B	B	B	A	B	A	B	B	B	B	B	A	B	A	A	B	B	B	B	A	B	B	A	B	A	A	B	B	A	H	A	B	A	B	A	B	B
BobWhite_c38419_677	2D	155.453	595162958	B	A	B	B	B	A	A	B	A	B	B	B	A	B	A	B	B	B	B	B	A	B	A	A	B	B	B	B	A	B	B	A	B	A	A	B	B	A	B	A	B	A	B	A	B	B
BobWhite_c8982_226	2D	155.453		B	A	B	B	B	A	A	B	A	B	B	B	A	B	A	B	B	B	B	B	A	B	A	A	B	B	B	B	A	B	B	A	B	A	A	B	B	A	H	A	B	A	B	A	B	B
BobWhite_rep_c50186_469	2D	155.453	596914588	B	A	B	B	B	A	A	B	A	B	B	B	A	B	A	B	B	B	B	B	A	B	A	A	B	B	B	B	A	B	B	A	B	A	A	B	B	A	H	A	B	A	B	A	B	B
BobWhite_rep_c51247_189	2D	155.453	725963042	B	A	B	B	B	A	A	B	A	B	B	B	A	B	A	B	B	B	B	B	A	B	A	A	B	B	B	B	A	B	B	A	B	A	A	B	B	A	H	A	B	A	B	A	B	B
BobWhite_rep_c53418_120	2D	155.453	600344121	B	A	B	B	B	A	A	B	A	B	B	B	A	B	A	B	B	B	B	B	A	B	A	A	B	B	B	B	A	B	B	A	B	A	A	B	B	A	H	A	B	A	B	A	B	B
CAP12_rep_c5547_123	2D	155.453	601601854	B	A	B	B	B	A	A	B	A	B	B	B	A	B	A	B	B	B	B	B	A	B	A	A	B	B	B	B	A	B	B	A	B	A	A	B	B	A	H	A	B	A	B	A	B	B
Excalibur_c1027_927	2D	155.453	590678517	B	A	B	B	B	A	A	-	A	B	B	B	A	B	A	B	B	B	B	B	A	B	A	A	B	B	B	B	A	B	B	A	B	A	A	B	B	A	H	A	B	A	B	A	B	B
Excalibur_c11133_209	2D	155.453	598717726	B	A	B	B	B	A	A	B	A	B	B	B	A	B	A	B	B	B	B	B	A	B	A	A	B	B	B	B	A	B	B	A	B	A	A	B	B	A	H	A	B	A	B	A	B	B
Excalibur_c21486_352	2D	155.453	580011582	B	A	B	B	B	A	A	B	A	B	B	B	A	B	A	B	B	B	B	B	A	B	A	A	B	B	B	B	A	B	B	A	B	A	A	B	B	A	H	A	B	A	B	A	B	B
Excalibur_c23239_718	2D	155.453	602513709	B	A	B	B	B	A	A	B	A	B	B	B	A	B	A	B	B	B	B	B	A	B	A	A	B	B	B	B	A	B	B	A	B	A	A	B	B	A	H	A	B	A	B	A	B	B
Excalibur_c23239_961	2D	155.453	602513220	B	A	B	B	B	A	A	B	A	B	B	B	A	B	A	B	B	B	B	B	A	B	A	A	B	B	B	B	A	B	B	A	B	A	A	B	B	A	H	A	B	A	B	A	B	B
Excalibur_c30328_713	2D	155.453	596912194	B	A	B	B	B	A	A	B	A	B	B	B	A	B	A	B	B	B	B	B	A	B	A	A	B	B	B	B	A	B	B	A	B	A	A	B	B	A	H	A	B	A	B	A	B	B
Excalibur_c74714_108	2D	155.453	587699172	B	A	B	B	B	A	A	B	A	B	B	B	A	B	A	B	B	B	B	B	A	B	A	A	B	B	B	B	A	B	B	A	B	A	A	B	B	A	H	A	B	A	B	A	B	B
Excalibur_c77484_60	2D	155.453	587702124	B	A	B	B	B	A	A	B	A	B	B	B	A	B	A	B	B	B	B	B	A	B	A	A	B	B	B	B	A	B	B	A	B	A	A	B	B	A	H	A	B	A	B	A	B	B
Excalibur_c95944_72	2D	155.453		B	A	B	B	B	A	A	B	A	B	B	B	A	B	A	B	B	B	B	B	A	B	A	A	B	B	B	B	A	B	B	A	B	A	A	B	B	A	H	A	B	A	B	A	B	B
Excalibur_rep_c86288_514	2D	155.453	600295858	B	A	B	B	B	A	A	B	A	B	B	B	A	B	A	B	B	B	B	B	A	B	A	A	B	B	B	B	A	B	B	A	B	A	A	B	B	A	H	A	B	A	B	A	B	B
GENE-0638_1119	2D	155.453	728071406	B	A	B	B	B	A	A	-	A	B	B	B	A	B	A	B	B	B	B	B	A	B	A	A	B	B	B	B	A	B	B	A	B	A	A	B	B	A	H	A	B	A	B	A	B	B
GENE-0638_677	2D	155.453	593274814	B	A	B	B	B	A	A	B	A	B	B	B	A	B	A	B	B	B	B	B	A	B	A	A	B	B	B	B	A	B	B	A	B	A	A	B	B	A	B	A	B	A	B	A	B	B
GENE-0684_1033	2D	155.453		B	A	B	B	B	A	A	B	A	B	B	B	A	B	A	B	B	B	B	B	A	B	A	A	B	B	B	B	A	B	B	A	B	A	A	B	B	A	H	A	B	A	B	A	B	B
GENE-0998_815	2D	155.453	600343714	B	A	B	B	B	A	A	B	A	B	B	B	A	B	A	B	B	B	B	B	A	B	A	A	B	B	B	B	A	B	B	A	B	A	A	B	B	A	-	A	B	A	B	A	B	B
GENE-1908_884	2D	155.453	594546815	B	A	B	B	B	A	A	B	A	B	B	B	A	B	A	B	B	B	B	B	A	B	A	A	B	B	B	B	A	B	B	A	B	A	A	B	B	A	H	A	B	A	B	A	B	B
IAAV8053	2D	155.453	384767131	B	A	B	B	B	A	A	B	A	B	B	B	A	B	A	B	B	B	B	B	A	B	A	A	B	B	B	B	A	B	B	A	B	A	A	B	B	A	-	A	B	A	B	A	B	B
Kukri_c29592_559	2D	155.453	724622599	B	A	B	B	B	A	A	B	A	B	B	B	A	B	A	B	B	B	B	B	A	B	A	A	B	B	B	B	A	B	B	A	B	A	A	B	B	A	-	A	B	A	B	A	B	B
Kukri_c3115_279	2D	155.453	722141663	B	A	B	B	B	A	A	B	A	B	B	B	A	B	A	B	B	B	B	B	A	B	A	A	B	B	B	B	A	B	B	A	B	A	A	B	B	A	H	A	B	A	B	A	B	B
Kukri_c32355_1027	2D	155.453	592787542	B	A	B	B	B	A	A	B	A	B	B	B	A	B	A	B	B	B	B	B	A	B	A	A	B	B	B	B	A	B	B	A	B	A	A	B	B	A	H	A	B	A	B	A	B	B
Kukri_c32355_1089	2D	155.453	592787604	B	A	B	B	B	A	A	B	A	B	B	B	A	B	A	B	B	B	B	B	A	B	A	A	B	B	B	B	A	B	B	A	B	A	A	B	B	A	H	A	B	A	B	A	B	B
Kukri_c34647_218	2D	155.453	723334015	B	A	B	B	B	A	A	B	A	B	B	B	A	B	A	B	B	B	B	B	A	B	A	A	B	B	B	B	A	B	B	A	B	A	A	B	B	A	H	A	B	A	B	A	B	B
Kukri_c51309_198	2D	155.453	714791611	B	A	B	B	B	A	A	B	A	B	B	B	A	B	A	B	B	B	B	B	A	B	A	A	B	B	B	B	A	B	B	A	B	A	A	B	B	A	H	A	B	A	B	A	B	B
Kukri_c65380_490	2D	155.453	736549098	B	A	B	B	B	A	A	B	A	B	B	B	A	B	A	B	B	B	B	B	A	B	A	A	B	B	B	B	A	B	B	A	B	A	A	B	B	A	H	A	B	A	B	A	B	B
Kukri_rep_c103890_185	2D	155.453	718120789	B	A	B	B	B	A	A	B	A	B	B	B	A	B	A	B	B	B	B	B	A	B	A	A	B	B	B	B	A	B	B	A	B	A	A	B	B	A	H	A	B	A	B	A	B	B
Kukri_rep_c68903_1100	2D	155.453	730190673	B	A	B	B	B	A	A	B	A	B	B	B	A	B	A	B	B	B	B	B	A	B	A	A	B	B	B	B	A	B	B	A	B	A	A	B	B	A	H	A	B	A	B	A	B	B
Kukri_rep_c72666_625	2D	155.453	601184144	B	A	B	B	B	A	A	-	A	B	B	B	A	B	A	B	B	B	B	B	A	B	A	A	B	B	B	B	A	B	B	A	B	A	A	B	B	A	H	A	B	A	B	A	B	B
Kukri_rep_c72959_145	2D	155.453	594102095	B	A	B	B	B	A	A	B	A	B	B	B	A	B	A	B	B	B	B	B	A	B	A	A	B	B	B	B	A	B	B	A	B	A	A	B	B	A	H	A	B	A	B	A	B	B
RAC875_c14797_658	2D	155.453	584607738	B	A	B	B	B	A	A	B	A	B	B	B	A	B	A	B	B	B	B	B	A	B	A	A	B	B	B	B	A	B	B	A	B	A	A	B	B	A	H	A	B	A	B	A	B	B
RAC875_c16967_68	2D	155.453	729286752	B	A	B	B	B	A	A	B	A	B	B	B	A	B	A	B	B	B	B	B	A	B	A	A	B	B	B	B	A	B	B	A	B	A	A	B	B	A	H	A	B	A	B	A	B	B
RAC875_c2176_2416	2D	155.453	601600667	B	A	B	B	B	A	A	B	A	B	B	B	A	B	A	B	B	B	B	B	A	B	A	A	B	B	B	B	A	B	B	A	B	A	A	B	B	A	H	A	B	A	B	A	B	B
RAC875_c24876_388	2D	155.453	594581418	B	A	B	B	B	A	A	B	A	B	B	B	A	B	A	B	B	B	B	B	A	B	A	A	B	B	B	B	A	B	B	A	B	A	A	B	B	A	H	A	B	A	B	A	B	B
RAC875_c5342_1312	2D	155.453	594190125	B	A	B	B	B	A	A	B	A	B	B	B	A	B	A	B	B	B	B	B	A	B	A	A	B	B	B	B	A	B	B	A	B	A	A	B	B	A	H	A	B	A	B	A	B	B
RAC875_c78404_242	2D	155.453	601212782	B	A	B	B	B	A	A	B	A	B	B	B	A	B	A	B	B	B	B	B	A	B	A	A	B	B	B	B	A	B	B	A	B	A	A	B	B	A	H	A	B	A	B	A	B	B
RAC875_rep_c69194_867	2D	155.453	700206508	B	A	B	B	B	A	A	B	A	B	B	B	A	B	A	B	B	B	B	B	A	B	A	A	B	B	B	B	A	B	B	A	B	A	A	B	B	A	H	A	B	A	B	A	B	B
RAC875_rep_c69388_134	2D	155.453	580387061	B	A	B	B	B	A	A	B	A	B	B	B	A	B	A	B	B	B	B	B	A	B	A	A	B	B	B	B	A	B	B	A	B	A	A	B	B	A	H	A	B	A	B	A	B	B
RAC875_rep_c69388_512	2D	155.453	580386318	B	A	B	B	B	A	A	B	A	B	B	B	A	B	A	B	B	B	B	B	A	B	A	A	B	B	B	B	A	B	B	A	B	A	A	B	B	A	H	A	B	A	B	A	B	B
RAC875_rep_c69388_778	2D	155.453	580386052	B	A	B	B	B	A	A	B	A	B	B	B	A	B	A	B	B	B	B	B	A	B	A	A	B	B	B	B	A	B	B	A	B	A	A	B	B	A	H	A	B	A	B	A	B	B
RAC875_rep_c69619_260	2D	155.453	734349056	B	A	B	B	B	A	A	B	A	B	B	B	A	B	A	B	B	B	B	B	A	B	A	A	B	B	B	B	A	B	B	A	B	A	A	B	B	A	H	A	B	A	B	A	B	B
RAC875_rep_c72115_351	2D	155.453	590240825	B	A	B	B	B	A	A	B	A	B	B	B	A	B	A	B	B	B	B	B	A	B	A	A	B	B	B	B	A	B	B	A	B	A	A	B	B	A	H	A	B	A	B	A	B	B
tplb0050m09_1890	2D	155.453	722841670	B	A	B	B	B	A	A	B	A	B	B	B	A	B	A	B	B	B	B	B	A	B	A	A	B	B	B	B	A	B	B	A	B	A	A	B	B	A	H	A	B	A	B	A	B	B
tplb0058k20_1741	2D	155.453	593734338	B	A	B	B	B	A	A	B	A	B	B	B	A	B	A	B	B	B	B	B	A	B	A	A	B	B	B	B	A	B	B	A	B	A	A	B	B	A	H	A	B	A	B	A	B	B
tplb0062d15_1382	2D	155.453	584864028	B	A	B	B	B	A	A	B	A	B	B	B	A	B	A	B	B	B	B	B	A	B	A	A	B	B	B	B	A	B	B	A	B	A	A	B	B	A	H	A	B	A	B	A	B	B
wsnp_BE445431D_Ta_2_1	2D	155.453	579902131	B	A	B	B	B	A	A	B	A	B	B	B	A	B	A	B	B	B	B	B	A	B	A	A	B	B	B	B	A	B	B	A	B	A	A	B	B	A	H	A	B	A	B	A	B	B
D_contig80448_280	2D	156.003		B	A	B	B	B	A	A	B	A	B	B	B	A	B	A	B	B	B	B	B	A	B	A	A	B	B	B	B	A	B	B	A	B	A	A	B	B	A	B	A	B	A	B	A	B	B
Excalibur_rep_c70308_701	2D	156.003	716594308	B	A	B	B	B	A	A	-	A	B	B	B	A	B	A	B	B	B	B	B	A	B	A	A	B	B	B	B	A	B	B	A	B	A	A	B	B	A	-	A	B	A	B	A	B	B
GENE-3066_157	2D	156.003	726024993	B	A	B	B	B	A	A	B	A	B	B	B	A	B	A	B	B	B	B	B	A	B	A	A	B	B	B	B	A	B	B	A	B	A	A	B	B	A	B	A	B	A	B	A	B	B
GENE-3157_174	2D	156.003	730613799	B	A	B	B	B	A	A	B	A	B	B	B	A	B	A	B	B	B	B	B	A	B	A	A	B	B	B	B	A	B	B	A	B	A	A	B	B	A	B	A	B	A	B	A	B	B
Ku_c674_915	2D	156.003	719522108	B	A	B	B	B	A	A	B	A	B	B	B	A	B	A	B	B	B	B	B	A	B	A	A	B	B	B	B	A	B	B	A	B	A	A	B	B	A	B	A	B	A	B	A	B	B
RAC875_c7201_229	2D	156.003	580194697	B	A	B	B	B	A	A	B	A	B	B	B	A	B	A	B	B	B	B	B	A	B	A	A	B	B	B	B	A	B	B	A	B	A	A	B	B	A	B	A	B	A	B	A	B	B
RFL_Contig3550_457	2D	156.003	590337130	B	A	B	B	B	A	A	B	A	B	B	B	A	B	A	B	B	B	B	B	A	B	A	A	B	B	B	B	A	B	B	A	B	A	A	B	B	A	B	A	B	A	B	A	B	B
BobWhite_c13924_707	2D	156.546	607423030	B	A	B	B	B	A	A	B	A	B	B	B	A	B	A	B	B	B	B	B	A	B	A	A	B	B	B	B	A	B	B	A	B	A	A	B	B	A	H	A	B	A	B	A	B	B
BobWhite_rep_c65414_271	2D	156.546	742471902	B	A	B	B	B	A	A	B	A	B	B	B	A	B	A	B	B	B	B	B	A	B	A	A	B	B	B	B	A	B	B	A	B	A	A	B	B	A	H	A	B	A	B	A	B	B
BS00024884_51	2D	156.546	617089339	B	A	B	B	B	A	A	B	A	B	B	B	A	B	A	B	B	B	B	B	A	B	A	A	B	B	B	B	A	B	B	A	B	A	A	B	B	A	H	A	B	A	B	A	B	B
D_contig14237_449	2D	156.546	611223072	B	A	B	B	B	A	A	B	A	B	B	B	A	B	A	B	B	B	B	B	A	B	A	A	B	B	B	B	A	B	B	A	B	A	A	B	B	A	B	A	B	A	B	A	B	B
Ex_c10068_1509	2D	156.546	619416307	B	A	B	B	B	A	A	B	A	B	B	B	A	B	A	B	B	B	B	B	A	B	A	A	B	B	B	B	A	B	B	A	B	A	A	B	B	A	H	A	B	A	B	A	B	B
Excalibur_c13046_700	2D	156.546	608756796	B	A	B	B	B	A	A	-	A	B	B	B	A	B	A	B	B	B	B	B	A	B	A	A	B	B	B	B	A	B	B	A	B	A	A	B	B	A	H	A	B	A	B	A	B	B
Excalibur_c1451_660	2D	156.546	612342729	B	A	B	B	B	A	A	B	A	B	B	B	A	B	A	B	B	B	B	B	A	B	A	A	B	B	B	B	A	B	B	A	B	A	A	B	B	A	H	A	B	A	B	A	B	B
Excalibur_c15426_661	2D	156.546	606718123	B	A	B	B	B	A	A	B	A	B	B	B	A	B	A	B	B	B	B	B	A	B	A	A	B	B	B	B	A	B	B	A	B	A	A	B	B	A	-	A	B	A	B	A	B	B
Excalibur_c18353_55	2D	156.546	608755604	B	A	B	B	B	A	A	B	A	B	B	B	A	B	A	B	B	B	B	B	A	B	A	A	B	B	B	B	A	B	B	A	B	A	A	B	B	A	-	A	B	A	B	A	B	B
Excalibur_c21749_470	2D	156.546	613322353	B	A	B	B	B	A	A	B	A	B	B	B	A	B	A	B	B	B	B	B	A	B	A	A	B	B	B	B	A	B	B	A	B	A	A	B	B	A	H	A	B	A	B	A	B	B
Excalibur_c8720_1073	2D	156.546	610276968	B	A	B	B	B	A	A	B	A	B	B	B	A	B	A	B	B	B	B	B	A	B	A	A	B	B	B	B	A	B	B	A	B	A	A	B	B	A	H	A	B	A	B	A	B	B
Excalibur_rep_c104620_183	2D	156.546	740360704	B	A	B	B	B	A	A	-	A	B	B	B	A	B	A	B	B	B	B	B	A	B	A	A	B	B	B	B	A	B	B	A	B	A	A	B	B	A	-	A	B	A	B	A	B	B
GENE-4595_130	2D	156.546	743387531	B	A	B	B	B	A	A	B	A	B	B	B	A	B	A	B	B	B	B	B	A	B	A	A	B	B	B	B	A	B	B	A	B	A	A	B	B	A	H	A	B	A	B	A	B	B
Kukri_c31121_1011	2D	156.546	607422971	B	A	B	B	B	A	A	B	A	B	B	B	A	B	A	B	B	B	B	B	A	B	A	A	B	B	B	B	A	B	B	A	B	A	A	B	B	A	H	A	B	A	B	A	B	B
Kukri_c31121_1460	2D	156.546	607423371	B	A	B	B	B	A	A	B	A	B	B	B	A	B	A	B	B	B	B	B	A	B	A	A	B	B	B	B	A	B	B	A	B	A	A	B	B	A	H	A	B	A	B	A	B	B
Kukri_c8752_281	2D	156.546	743097070	B	A	B	B	B	A	-	B	A	B	B	B	A	B	-	B	B	B	B	B	A	B	A	A	B	B	B	B	-	B	B	A	B	A	A	B	B	A	-	A	B	A	B	A	B	B
Kukri_rep_c101148_401	2D	156.546	611159777	B	A	B	B	B	A	A	B	A	B	B	B	A	B	A	B	B	B	B	B	A	B	A	A	B	B	B	B	A	B	B	A	B	A	A	B	B	A	H	A	B	A	B	A	B	B
Kukri_rep_c70958_1044	2D	156.546	607418730	B	A	B	B	B	A	A	B	A	B	B	B	A	B	A	B	B	B	B	B	A	B	A	A	B	B	B	B	A	B	B	A	B	A	A	B	B	A	H	A	B	A	B	A	B	B
Kukri_rep_c70958_916	2D	156.546	607418858	B	A	B	B	B	A	A	B	A	B	B	B	A	B	A	B	B	B	B	B	A	B	A	A	B	B	B	B	A	B	B	A	B	A	A	B	B	A	B	A	B	A	B	A	B	B
RAC875_c17722_1704	2D	156.546	611159777	B	A	B	B	B	A	A	B	A	B	B	B	A	B	A	B	B	B	B	B	A	B	A	A	B	B	B	B	A	B	B	A	B	A	A	B	B	A	H	A	B	A	B	A	B	B
RAC875_c20076_907	2D	156.546		B	A	B	B	B	A	A	B	A	B	B	B	A	B	A	B	B	B	B	B	A	B	A	A	B	B	B	B	A	B	B	A	B	A	A	B	B	A	H	A	B	A	B	A	B	B
RAC875_c29079_177	2D	156.546	619576316	B	A	B	B	B	A	A	B	A	B	B	B	A	B	A	B	B	B	B	B	A	B	A	A	B	B	B	B	A	B	B	A	B	A	A	B	B	A	H	A	B	H	B	A	B	B
RAC875_c54391_236	2D	156.546		B	A	B	B	B	A	A	B	A	B	B	B	A	B	A	B	B	B	B	B	A	B	A	A	B	B	B	B	A	B	B	A	B	A	A	B	B	A	B	A	B	A	B	A	B	B
RAC875_rep_c120698_93	2D	156.546	742465385	B	A	B	B	B	A	A	B	A	B	B	B	A	B	A	B	B	B	B	B	A	B	A	A	B	B	B	B	A	B	B	A	B	A	A	B	B	A	H	A	B	A	B	A	B	B
TA021271-0482	2D	156.546		B	A	B	B	B	A	A	B	A	B	B	B	A	B	A	B	B	B	B	B	A	B	A	A	B	B	B	B	A	B	B	A	B	A	A	B	B	A	H	A	B	A	B	A	B	B
tplb0021e03_713	2D	156.546	609775957	B	A	B	B	B	A	A	B	A	B	B	B	A	B	A	B	B	B	B	B	A	B	A	A	B	B	B	B	A	B	B	A	B	A	A	B	B	A	H	A	B	A	B	A	B	B
wsnp_BE490384D_Ta_1_1	2D	156.546	619559886	B	A	B	B	B	A	A	B	A	B	B	B	A	B	A	B	B	B	B	B	A	B	A	A	B	B	B	B	A	B	B	A	B	A	A	B	B	A	H	A	B	A	B	A	B	B
wsnp_BE490384D_Ta_1_2	2D	156.546	619560063	B	A	B	B	B	A	A	B	A	B	B	B	A	B	A	B	B	B	B	B	A	B	A	A	B	B	B	B	A	B	B	A	B	A	A	B	B	A	H	A	B	A	B	A	B	B
wsnp_Ex_c42970_49408712	2D	156.546	619558727	B	A	B	B	B	A	A	-	A	B	B	B	A	B	A	B	B	B	B	B	A	B	A	A	B	B	B	B	A	B	B	A	B	A	A	B	B	A	H	A	B	A	B	A	B	B
wsnp_Ku_c9269_15583444	2D	156.546	609485721	B	A	B	B	B	A	A	B	A	B	B	B	A	B	A	B	B	B	B	B	A	B	A	A	B	B	B	B	A	B	B	A	B	A	A	B	B	A	H	A	B	A	B	A	B	B
BS00067927_51	2D	157.34	618697011	H	A	H	B	H	A	A	H	A	B	H	B	A	B	A	H	H	H	B	H	A	B	A	A	H	B	B	B	A	H	H	A	B	A	A	H	H	A	H	A	B	A	H	A	H	H
Excalibur_c23239_783	2D	157.34	602513644	-	A	H	B	H	A	A	B	A	B	-	B	A	B	A	H	-	H	B	H	A	B	A	A	H	B	B	B	A	H	H	A	B	A	A	H	H	A	H	A	B	A	H	A	B	H
Kukri_c28650_111	3A	0	7920709	B	B	B	B	B	A	B	B	B	A	A	A	B	B	A	B	A	A	A	A	B	B	A	A	A	A	B	B	B	A	A	B	A	A	B	B	B	A	A	A	B	B	B	A	B	A
Kukri_rep_c89183_282	3A	0	8686047	H	H	B	B	B	A	B	B	H	A	A	A	B	B	A	B	A	A	A	A	B	B	A	A	A	A	B	B	H	A	A	H	A	A	B	B	B	A	A	A	B	B	B	A	B	A
wsnp_Ku_c10362_17156084	3A	3.7105	12781485	A	B	B	B	B	A	B	-	B	A	A	A	A	B	A	B	A	A	A	A	B	B	A	A	A	A	B	B	A	A	A	B	A	A	B	B	B	A	A	A	B	B	B	B	B	A
BobWhite_c17021_297	3A	6.0932	6730408	A	B	B	B	B	A	B	B	H	A	A	A	A	B	A	B	A	H	A	A	B	B	A	A	A	A	B	B	A	A	A	B	A	A	B	B	B	A	A	A	B	B	B	B	B	A
BS00055211_51	3A	6.0932	12998762	A	B	B	B	B	A	B	B	H	A	A	A	A	B	A	B	A	H	A	A	B	B	A	A	A	A	B	B	A	A	A	B	A	A	B	B	B	A	A	A	B	B	B	B	B	A
Excalibur_c74666_291	3A	6.0932	13909226	A	B	B	B	B	A	B	B	-	A	A	A	A	B	A	B	A	-	A	A	B	B	A	A	A	A	B	B	A	A	A	B	A	A	B	B	B	A	A	A	B	B	B	B	B	A
Jagger_c8039_67	3A	6.0932	13035944	A	B	B	B	B	A	B	B	H	A	A	A	A	B	A	B	A	H	A	A	B	B	A	A	A	A	B	B	A	A	A	B	A	A	B	B	B	A	A	A	B	B	B	B	B	A
wsnp_Ex_c22683_31887799	3A	6.0932	13901501	A	B	B	B	B	A	B	B	H	A	A	A	A	B	A	B	A	H	A	A	B	B	A	A	A	A	B	B	A	A	A	B	A	A	B	B	B	A	A	A	B	B	B	B	B	A
Excalibur_c10383_432	3A	6.668	6334467	A	B	B	B	B	A	B	B	H	A	A	A	A	B	A	B	A	H	A	A	B	B	A	A	A	A	B	B	A	A	A	B	A	A	B	B	B	A	A	A	B	B	B	B	B	A
IAAV1155	3A	6.668	14851251	A	B	B	B	B	A	B	B	H	A	A	A	A	B	A	B	A	H	A	A	B	B	A	A	A	A	B	B	A	A	A	B	A	A	B	B	B	A	A	A	B	B	B	B	B	A
RAC875_c20134_535	3A	6.668	14851011	A	B	B	B	B	A	B	B	H	A	A	A	A	B	A	B	A	H	A	A	B	B	A	A	A	A	B	B	A	A	A	B	A	A	B	B	B	A	A	A	B	B	B	B	B	A
Ra_c6118_350	3A	12.539	19485955	A	B	A	B	B	A	B	B	H	A	A	A	A	B	A	B	A	H	A	B	A	B	H	A	A	A	B	A	A	A	A	B	A	A	B	B	B	A	A	A	B	B	B	B	B	B
wsnp_Ra_rep_c106523_90273922	3A	15.6294	20004322	A	B	A	B	B	A	B	B	H	A	A	A	A	B	A	B	A	H	A	B	A	B	H	B	A	A	A	A	B	A	A	B	A	A	B	B	B	A	A	A	B	B	B	B	B	H
Tdurum_contig52302_649	3A	17.4374	21788031	A	B	A	B	B	A	B	B	H	A	A	A	A	B	A	B	A	A	A	B	A	B	H	B	A	A	A	A	B	A	A	B	A	A	B	B	B	A	A	A	B	B	B	B	B	H
wsnp_JD_c2722_3653988	3A	17.4374	21788603	A	B	A	B	B	A	B	B	H	A	A	A	A	B	A	B	A	A	A	B	A	B	H	B	A	A	A	A	B	A	A	B	A	A	B	B	B	A	A	A	B	B	B	B	B	H
BobWhite_c37325_92	3A	18.0188	15926437	A	B	A	B	B	A	B	B	H	A	A	A	A	B	A	B	A	A	A	B	A	B	-	B	A	A	A	A	B	A	A	B	A	A	B	B	B	A	A	A	B	B	B	B	B	H
Kukri_c13830_556	3A	18.0188	20329322	A	B	A	B	B	A	B	B	H	A	A	A	A	B	A	B	A	A	A	B	A	B	H	B	A	A	A	A	B	A	A	B	A	A	B	B	B	A	A	A	B	B	B	B	B	H
TA001885-0568	3A	18.0188		A	B	A	B	B	A	B	B	A	A	A	A	A	B	A	B	A	A	A	B	A	B	A	B	A	A	A	A	B	A	A	B	A	A	B	B	B	A	A	A	B	B	B	B	B	H
BS00057445_51	3A	23.1651	25388020	A	B	A	B	B	B	B	B	A	A	B	A	A	B	A	B	A	A	A	B	A	B	H	B	A	A	A	A	A	A	A	B	B	A	B	B	B	B	A	A	B	H	B	B	B	H
RFL_Contig1896_1236	3A	24.91	25000429	A	B	A	B	B	B	B	A	A	A	B	A	A	B	A	B	A	A	A	B	A	B	H	B	A	A	A	A	A	A	A	B	A	A	B	B	B	B	A	A	B	B	B	B	B	-
BS00025191_51	3A	44.6215	36474903	A	A	B	B	B	B	B	A	A	B	A	B	A	B	A	B	A	B	A	B	A	A	B	B	B	B	A	A	A	A	A	B	B	A	B	B	B	B	B	A	A	B	A	B	A	A
BS00048757_51	3A	44.6215	38037262	A	A	B	B	B	B	B	A	A	B	A	B	A	B	A	B	A	B	A	B	A	A	B	B	B	B	A	A	A	A	A	B	B	A	B	B	B	B	B	A	A	B	A	B	A	A
BS00065956_51	3A	44.6215		A	A	B	B	B	B	B	A	A	B	A	B	A	B	A	B	A	B	A	B	A	A	B	B	B	B	A	A	A	A	A	B	B	A	B	B	B	B	B	A	A	B	A	B	A	A
Excalibur_c25239_283	3A	44.6215	36921940	A	A	B	B	B	B	B	H	A	B	A	B	A	B	A	B	A	B	A	B	A	A	B	B	B	B	A	A	A	A	A	B	B	A	B	B	B	B	B	A	A	B	A	B	A	A
IAAV5729	3A	44.6215	36921508	A	A	B	B	B	B	B	A	A	B	A	B	A	B	A	B	A	B	A	B	A	A	B	B	B	B	A	A	A	A	A	B	B	A	B	B	B	B	B	A	A	B	A	B	A	A
wsnp_Ex_c15674_24004513	3A	44.6215	34522012	A	A	B	B	B	B	B	A	A	B	A	B	A	B	A	B	A	B	A	B	A	A	B	B	B	B	A	A	A	A	A	B	B	A	B	B	B	B	B	A	A	B	A	B	A	A
wsnp_Ku_c4568_8243775	3A	44.6215	34524435	A	A	B	B	B	B	B	H	A	B	A	B	A	B	A	B	A	B	A	B	A	A	B	B	B	B	A	A	A	A	A	B	B	A	B	B	B	B	B	A	A	B	A	B	A	A
BS00007502_51	3A	64.4522	56399617	H	H	B	B	A	A	B	H	A	B	A	B	A	B	A	B	H	A	B	B	A	A	B	B	B	B	A	A	B	A	A	B	A	A	B	A	B	B	A	A	A	B	A	A	A	-
BS00032524_51	3A	64.4523	56140249	H	H	B	B	A	A	B	A	A	B	A	B	A	B	A	B	H	A	B	B	A	A	B	B	B	B	A	A	B	A	A	B	A	A	B	A	B	B	A	A	A	B	A	A	A	A
BS00065468_51	3A	64.4523	56394540	H	H	B	B	A	A	B	A	A	B	A	B	A	B	A	B	H	A	B	B	A	A	B	B	B	B	A	A	B	A	A	B	A	A	B	A	B	B	A	A	A	B	A	A	A	A
BS00094366_51	3A	64.4523	56397857	H	H	B	B	A	A	B	A	A	B	A	B	A	B	A	B	H	A	B	B	A	A	B	B	B	B	A	A	B	A	A	B	A	A	B	A	B	B	A	A	A	B	A	A	A	A
Excalibur_c10079_1585	3A	64.4523	56675625	H	H	B	B	A	A	B	A	A	B	A	B	A	B	A	B	H	A	B	B	A	A	B	B	B	B	A	A	B	A	A	B	A	A	B	A	B	B	A	A	A	B	A	A	A	A
IAAV2646	3A	64.4523	56676186	H	H	B	B	A	A	B	A	A	B	A	B	A	B	A	B	H	A	B	B	A	A	B	B	B	B	A	A	B	A	A	B	A	A	B	A	B	B	A	A	A	B	A	A	A	A
RAC875_c2464_274	3A	64.4523	56676091	H	H	B	B	A	A	B	A	A	B	A	B	A	B	A	B	H	A	B	B	A	A	B	B	B	B	A	A	B	A	A	B	A	A	B	A	B	B	A	A	A	B	A	A	A	A
Tdurum_contig86206_149	3A	64.4523		H	H	B	B	A	A	B	H	A	B	A	B	A	B	A	B	H	A	B	B	A	A	B	B	B	B	A	A	B	A	A	B	A	A	B	A	B	B	A	A	A	B	A	A	A	A
Excalibur_rep_c102974_175	3A	65.6289		H	-	B	B	A	A	B	-	A	B	A	B	A	B	A	B	-	A	B	B	A	A	B	B	B	B	A	A	B	A	A	B	A	B	B	A	B	B	A	A	A	B	A	A	A	A
Excalibur_s113043_59	3A	65.6289		-	H	B	B	A	A	B	-	A	B	A	B	A	B	A	B	H	A	B	B	A	A	B	B	B	B	A	A	B	A	A	B	A	B	B	A	B	B	A	A	A	B	A	A	A	A
wsnp_Ku_c11052_18135847	3A	65.6289	61348556	H	H	B	B	A	A	B	A	A	B	A	B	A	B	A	B	H	A	B	B	A	A	B	B	B	B	A	A	B	A	A	B	A	B	B	A	B	B	A	A	A	B	A	A	A	A
BS00034334_51	3A	65.629	61219665	H	H	B	B	A	A	B	A	A	B	A	B	A	B	A	B	H	A	B	B	A	A	B	B	B	B	A	A	B	A	A	B	A	B	B	A	B	B	A	A	A	B	A	A	A	A
BS00021976_51	3A	66.8196	168837325	H	H	B	B	A	A	B	A	A	B	A	B	A	B	A	B	A	A	B	B	A	H	B	B	B	B	A	A	B	A	A	B	A	B	B	A	B	B	A	A	A	A	A	A	B	A
BS00110129_51	3A	66.8196	266691282	H	H	B	B	A	A	B	A	A	B	A	B	A	B	A	B	A	A	B	B	A	H	B	B	B	B	A	A	B	A	A	B	A	B	B	A	B	B	A	A	A	A	A	A	B	A
IAAV6974	3A	66.8196	199140281	H	H	B	B	A	A	B	A	A	B	A	B	A	B	A	B	A	A	B	B	A	H	B	B	B	B	A	A	B	A	A	B	A	B	B	A	B	B	A	A	A	A	A	A	B	A
wsnp_Ex_c6217_10848574	3A	66.8196	367836257	H	H	B	B	A	A	B	A	A	B	A	B	A	B	A	B	A	A	B	B	A	H	B	B	B	B	A	A	B	A	A	B	A	B	B	A	B	B	A	A	A	A	A	A	B	A
wsnp_Ex_rep_c66763_65120251	3A	66.8196	331618207	H	H	B	B	A	A	B	A	A	B	A	B	A	B	A	B	A	A	B	B	A	H	B	B	B	B	A	A	B	A	A	B	A	B	B	A	B	B	A	A	A	A	A	A	B	A
wsnp_Ex_rep_c67727_66398596	3A	66.8196		H	H	B	B	A	A	B	A	A	B	A	B	A	B	A	B	A	A	B	B	A	H	B	B	B	B	A	A	B	A	A	B	A	B	B	A	B	B	A	A	A	A	A	A	B	A
wsnp_Ku_c44089_51445136	3A	66.8196	401710412	-	-	B	B	A	A	B	A	A	B	A	B	A	B	A	B	A	A	B	B	A	-	B	B	B	B	A	A	B	A	A	B	A	B	B	A	B	B	A	A	A	A	A	A	B	A
wsnp_RFL_Contig3866_4228783	3A	66.8196	471521177	H	H	B	B	A	A	B	A	A	B	A	B	A	B	A	B	A	A	B	B	A	H	B	B	B	B	A	A	B	A	A	B	A	B	B	A	B	B	A	A	A	A	A	A	B	A
BS00037400_51	3A	67.9692	430790353	H	H	B	B	A	A	B	A	A	B	A	B	A	A	A	B	A	A	B	B	A	H	B	B	B	B	A	A	B	A	A	B	A	B	B	A	B	B	A	B	A	A	A	A	B	A
BS00089400_51	3A	67.9692	433556489	H	H	B	B	A	A	B	A	A	B	A	B	A	A	A	B	A	A	B	B	A	H	B	B	B	B	A	A	B	A	A	B	A	B	B	A	B	B	A	B	A	A	A	A	B	A
Tdurum_contig57753_138	3A	67.9692	433410408	H	H	B	B	A	A	B	A	A	B	A	B	A	A	A	B	A	A	B	B	A	H	B	B	B	B	A	A	B	A	A	B	A	B	B	A	B	B	A	B	A	A	A	A	B	A
Tdurum_contig62502_90	3A	67.9692	300777898	H	H	B	B	A	A	B	A	A	B	A	B	A	A	A	B	A	A	B	B	A	H	B	B	B	B	A	A	B	A	A	B	A	B	B	A	B	B	A	B	A	A	A	A	B	A
Tdurum_contig697_73	3A	67.9692	434615887	H	H	B	B	A	A	B	A	A	B	A	B	A	A	A	B	A	A	B	B	A	H	B	B	B	B	A	A	B	A	A	B	A	B	B	A	B	B	A	B	A	A	A	A	B	A
BobWhite_c43213_184	3A	68.5374		A	-	B	B	A	A	B	A	A	B	A	B	A	A	A	B	A	A	B	B	A	-	B	B	B	B	A	A	B	A	A	B	A	B	B	A	B	B	A	B	A	A	A	A	B	A
BS00066475_51	3A	68.5374		H	H	B	B	A	A	B	H	A	B	A	B	A	A	A	B	A	A	B	B	A	H	B	B	B	B	A	A	B	A	A	B	A	B	B	A	B	B	A	B	A	-	A	A	B	A
wsnp_CAP11_c2438_1258747	3A	68.5374	471358821	H	H	B	B	A	A	B	A	A	B	A	B	A	A	A	B	A	A	B	B	A	H	B	B	B	B	A	A	B	A	A	B	A	B	B	A	B	B	A	B	A	A	A	A	B	A
wsnp_JD_rep_c64325_41024646	3A	68.5374	466111373	H	H	B	B	A	A	B	A	A	B	A	B	A	A	A	B	A	A	B	B	A	H	B	B	B	B	A	A	B	A	A	B	A	B	B	A	B	B	A	B	A	A	A	A	B	A
CAP8_c4697_108	3A	69.1056		A	A	B	B	A	A	B	A	A	B	B	B	A	A	A	B	A	A	B	B	A	-	B	B	B	B	A	A	B	A	A	B	A	B	B	A	B	B	A	B	A	A	A	A	B	A
wsnp_Ku_c3956_7237642	3A	70.5553	502402777	-	-	B	B	A	A	B	B	-	B	B	B	A	A	A	B	A	-	B	B	-	B	B	B	B	B	-	A	B	A	A	B	-	B	B	A	B	B	A	B	-	H	A	B	B	-
Tdurum_contig28699_54	3A	74.2936	523557457	B	A	A	B	A	A	B	B	A	B	B	B	A	A	A	B	A	A	B	B	A	A	B	B	B	B	A	A	B	A	A	B	A	B	B	A	B	B	A	B	A	A	A	B	B	A
wsnp_Ex_c15269_23492289	3A	76.0184	533660277	B	-	A	B	A	A	B	A	A	B	B	B	A	A	A	B	A	A	B	B	A	A	B	B	B	B	A	A	B	A	A	B	A	B	A	A	B	-	A	B	A	A	A	B	B	A
BobWhite_c18408_199	3A	76.6282	538668205	B	-	-	B	A	A	B	A	A	B	B	B	A	A	A	B	A	A	B	B	-	-	B	B	B	B	A	A	B	A	A	B	A	B	B	A	B	B	-	B	A	A	A	B	B	-
wsnp_RFL_Contig3396_3515504	3A	76.6282	541080893	B	H	H	B	A	A	B	A	A	B	B	B	A	A	A	B	A	A	B	B	H	H	B	B	B	B	A	A	B	A	A	B	A	B	B	A	B	B	H	B	A	A	A	B	B	H
Tdurum_contig50392_1355	3A	77.2306	522060498	B	-	B	B	A	A	B	A	A	B	B	B	A	A	A	B	A	A	B	B	B	H	B	B	B	B	A	A	B	A	A	B	A	B	B	A	B	B	B	B	A	A	A	B	B	B
wsnp_Ex_c2148_4035913	3A	77.2306	514311539	B	-	-	B	A	A	B	H	A	B	B	B	A	A	A	B	A	A	B	B	-	-	B	B	B	B	A	A	B	A	A	B	A	B	B	A	B	B	-	B	A	A	A	B	B	-
wsnp_Ku_c4886_8753646	3A	77.2306	522274765	B	H	H	B	A	A	B	A	A	B	B	B	A	A	A	B	A	A	B	B	H	-	B	B	B	B	A	A	B	A	A	B	A	B	B	A	B	B	H	B	A	A	A	B	B	B
Excalibur_c854_1459	3A	77.7988		B	B	B	B	A	A	B	A	A	B	B	B	A	A	A	B	A	A	B	B	B	B	B	B	B	B	A	A	B	A	A	B	A	B	B	A	B	B	B	B	A	A	A	B	B	B
Ku_c19285_555	3A	79.5237		B	B	A	B	A	A	B	A	A	B	B	B	A	A	A	B	A	A	B	B	B	B	B	B	B	B	A	A	B	A	A	B	A	B	B	A	B	B	-	B	A	A	A	B	B	B
Tdurum_contig22253_104	3A	81.3101		B	B	B	B	A	A	B	A	A	B	B	B	A	A	A	B	A	A	B	B	B	-	B	B	B	B	A	A	B	A	A	B	A	B	B	A	B	B	A	B	A	A	A	A	B	B
wsnp_Ku_c1307_2606226	3A	81.3102	500977630	-	-	B	B	A	A	B	A	A	B	B	B	A	A	A	B	A	A	B	B	H	H	B	B	B	B	A	A	B	A	A	B	A	B	B	A	B	B	A	B	A	A	A	A	B	-
BS00010204_51	3A	81.8984	477708738	H	H	B	B	A	A	B	A	A	B	A	B	A	A	A	B	A	A	B	B	A	H	B	B	B	B	A	A	B	A	A	B	A	B	B	A	B	B	A	B	A	A	A	A	B	A
BS00010531_51	3A	81.8984	480437531	H	H	B	B	A	A	B	A	A	B	A	B	A	A	A	B	A	A	B	B	A	H	B	B	B	B	A	A	B	A	A	B	A	B	B	A	B	B	A	B	A	A	A	A	B	H
BS00062645_51	3A	81.8984		H	H	B	B	A	A	B	A	A	B	A	B	A	A	A	B	A	A	B	B	A	H	B	B	B	B	A	A	B	A	A	B	A	B	B	A	B	B	A	B	A	A	A	A	B	A
Excalibur_c64302_103	3A	81.8984	480104404	H	H	B	B	A	A	B	A	A	B	A	B	A	A	A	B	A	A	B	B	A	H	B	B	B	B	A	A	B	A	A	B	A	B	B	A	B	B	A	B	A	A	A	A	B	A
JD_c1187_1398	3A	81.8984	480105504	H	H	B	B	A	A	B	A	A	B	A	B	A	A	A	B	A	A	B	B	A	H	B	B	B	B	A	A	B	A	A	B	A	B	B	A	B	B	A	B	A	A	A	A	B	A
Ku_c17569_905	3A	81.8984	481019772	H	H	B	B	A	A	B	A	A	B	A	B	A	A	A	B	A	A	B	B	A	H	B	B	B	B	A	A	B	A	A	B	A	B	B	A	B	B	A	B	A	A	A	A	B	H
Kukri_c54729_181	3A	81.8984		H	H	B	B	A	A	B	A	A	B	A	B	A	A	A	B	A	A	B	B	A	H	B	B	B	B	A	A	B	A	A	B	A	B	B	A	B	B	A	B	A	A	A	A	B	A
RAC875_c27323_867	3A	81.8984	480438551	H	H	B	B	A	A	B	A	A	B	A	B	A	A	A	B	A	A	B	B	A	H	B	B	B	B	A	A	B	A	A	B	A	B	B	A	B	B	A	B	A	A	A	A	B	H
RAC875_rep_c104403_524	3A	81.8984	466262952	H	H	B	B	A	A	B	H	A	B	A	B	A	A	A	B	A	A	B	B	A	H	B	B	B	B	-	A	B	A	A	B	A	B	B	A	B	B	-	B	A	A	A	A	B	-
wsnp_Ex_c3478_6369892	3A	81.8984		H	H	B	B	A	A	B	A	A	B	A	B	A	A	A	B	A	A	B	B	A	H	B	B	B	B	A	A	B	A	A	B	A	B	B	A	B	B	A	B	A	A	A	A	B	A
wsnp_Ex_c53364_56625806	3A	81.8984	481523863	H	-	B	B	A	A	B	H	A	B	A	B	A	A	A	B	A	A	B	B	A	H	B	B	B	B	A	A	B	A	A	B	A	B	B	A	B	B	A	B	A	A	A	A	B	H
wsnp_Ex_c5929_10402147	3A	81.8984	481018306	H	H	B	B	A	A	B	H	A	B	A	B	A	A	A	B	A	A	B	B	A	H	B	B	B	B	A	A	B	A	A	B	A	B	B	A	B	B	A	B	A	A	A	A	B	H
wsnp_Ex_rep_c101340_86719239	3A	81.8984	480147334	H	H	B	B	A	A	B	H	A	B	A	B	A	A	A	B	A	A	B	B	A	H	B	B	B	B	A	A	B	A	A	B	A	B	B	A	B	B	A	B	A	A	A	A	B	A
wsnp_Ra_c44141_50623811	3A	81.8984	481518244	H	H	B	B	A	A	B	A	A	B	A	B	A	A	A	B	A	A	B	B	A	H	B	B	B	B	A	A	B	A	A	B	A	B	B	A	B	B	A	B	A	A	A	A	B	H
BobWhite_c26893_161	3A	82.4866	502268610	H	H	B	B	A	A	B	A	A	B	B	B	A	A	A	B	A	A	B	B	H	H	B	B	B	B	A	A	B	A	A	B	A	B	B	A	B	B	A	B	A	A	A	A	B	H
BS00045327_51	3A	82.4866	485012145	H	H	B	B	A	A	B	A	A	B	B	B	A	A	A	B	A	A	B	B	A	H	B	B	B	B	A	A	B	A	A	B	A	B	B	A	B	B	A	B	A	A	A	A	B	H
BS00093377_51	3A	82.4866		H	H	B	B	A	A	B	A	A	B	B	B	A	A	A	B	A	A	B	B	A	H	B	B	B	B	A	A	B	A	A	B	A	B	B	A	B	B	A	B	A	A	A	A	B	H
Ex_c67794_487	3A	82.4866	500977005	H	H	B	B	A	A	B	-	A	B	B	B	A	A	A	B	A	A	B	B	H	H	B	B	B	B	A	A	B	A	A	B	A	B	B	A	B	B	A	B	A	A	A	A	B	H
Ku_c14982_168	3A	82.4866	497649774	H	H	B	B	A	A	B	A	A	B	B	B	A	A	A	B	A	A	B	B	H	H	B	B	B	B	A	A	B	A	A	B	A	B	B	A	B	B	A	B	A	A	A	A	B	H
Kukri_c1307_1223	3A	82.4866	500977584	H	H	B	B	A	A	B	A	A	B	B	B	A	A	A	B	A	A	B	B	H	H	B	B	B	B	A	A	B	A	A	B	A	B	B	A	B	B	A	B	A	A	A	A	B	H
Kukri_rep_c102095_679	3A	82.4866	500994712	H	H	B	B	A	A	B	A	A	B	B	B	A	A	A	B	A	A	B	B	H	H	B	B	B	B	A	A	B	A	A	B	A	B	B	A	B	B	A	B	A	A	A	A	B	H
Kukri_rep_c112061_617	3A	82.4866	487438266	H	H	B	B	A	A	B	A	A	B	B	B	A	A	A	B	A	A	B	B	A	H	B	B	B	B	A	A	B	A	A	B	A	B	B	A	B	B	A	B	A	A	A	A	B	H
RAC875_rep_c70746_582	3A	82.4866	481602655	H	H	B	B	A	A	B	A	A	B	B	B	A	A	A	B	A	A	B	B	A	H	B	B	B	B	A	A	B	A	A	B	A	B	B	A	B	B	A	B	A	A	A	A	B	H
RFL_Contig1798_1606	3A	82.4866	495073247	H	H	B	B	A	A	B	A	A	B	B	B	A	A	A	B	A	A	B	B	H	H	B	B	B	B	A	A	B	A	A	B	A	B	B	A	B	B	A	B	A	A	A	A	B	H
RFL_Contig4399_956	3A	82.4866	496704860	H	H	B	B	A	A	B	-	A	B	B	B	A	A	A	B	A	A	B	B	H	H	B	B	B	B	A	A	B	A	A	B	A	B	B	A	B	B	A	B	A	A	A	A	B	H
wsnp_BE443995B_Ta_2_2	3A	82.4866	487437355	H	H	B	B	A	A	B	A	A	B	B	B	A	A	A	B	A	A	B	B	A	H	B	B	B	B	A	A	B	A	A	B	A	B	B	A	B	B	A	B	A	A	A	A	B	H
wsnp_BF429272A_Ta_2_1	3A	82.4866	498774691	H	H	B	B	A	A	B	H	A	B	B	B	A	A	A	B	A	A	B	B	H	H	B	B	B	B	A	A	B	A	A	B	A	B	B	A	B	B	A	B	A	A	A	A	B	H
wsnp_Ex_c11397_18400400	3A	82.4866	497655032	H	H	B	B	A	A	B	A	A	B	B	B	A	A	A	B	A	A	B	B	H	H	B	B	B	B	A	A	B	A	A	B	A	B	B	A	B	B	A	B	A	A	A	A	B	H
wsnp_Ex_c14681_22747500	3A	82.4866		H	H	B	B	A	A	B	H	A	B	B	B	A	A	A	B	A	A	B	B	A	H	B	B	B	B	A	A	B	A	A	B	A	B	B	A	B	B	A	B	A	A	A	A	B	H
wsnp_Ex_c2678_4968284	3A	82.4866	502386615	H	H	B	B	A	A	B	A	A	B	B	B	A	A	A	B	A	A	B	B	H	H	B	B	B	B	A	A	B	A	A	B	A	B	B	A	B	B	A	B	A	A	A	A	B	H
wsnp_Ex_c28310_37444843	3A	82.4866		H	H	B	B	A	A	B	H	A	B	B	B	A	A	A	B	A	A	B	B	A	H	B	B	B	B	A	A	B	A	A	B	A	B	B	A	B	B	A	B	A	A	A	A	B	H
wsnp_Ex_rep_c108072_91444417	3A	82.4866	496987868	H	H	B	B	A	A	B	A	A	B	B	B	A	A	A	B	A	A	B	B	H	H	B	B	B	B	A	A	B	A	A	B	A	B	B	A	B	B	A	B	A	A	A	A	B	H
wsnp_JD_c11273_11770307	3A	82.4866	487439334	H	H	B	B	A	A	B	-	A	B	B	B	A	A	A	B	A	A	B	B	A	H	B	B	B	B	A	A	B	A	A	B	A	B	B	A	B	B	A	B	A	A	A	A	B	H
wsnp_Ku_c3343_6206887	3A	82.4866	502385045	H	H	B	B	A	A	B	A	A	B	B	B	A	A	A	B	A	A	B	B	H	H	B	B	B	B	A	A	B	A	A	B	A	B	B	A	B	B	A	B	A	A	A	A	B	H
wsnp_Ex_c11039_17902115	3A	82.4867	474405059	H	H	B	B	A	A	B	H	A	B	B	B	A	A	A	B	A	A	B	B	A	H	B	B	B	B	A	A	B	A	A	B	A	B	B	A	B	B	A	B	A	A	A	A	B	H
wsnp_Ku_c3956_7237707	3A	83.0891	502402842	H	H	B	B	A	A	B	A	A	B	B	B	A	A	A	B	A	A	B	B	H	H	B	B	B	B	A	A	B	A	A	B	A	B	B	A	B	B	A	B	A	A	A	B	B	H
BobWhite_s65081_93	3A	83.6988	510690497	B	H	H	B	A	A	B	A	A	B	B	B	A	A	A	B	A	A	B	B	H	H	B	B	B	B	A	A	B	A	A	B	A	B	B	A	B	B	H	B	A	A	A	B	B	H
BS00071823_51	3A	83.6988	511754996	B	H	H	B	A	A	B	-	A	B	B	B	A	A	A	B	A	A	B	B	H	H	B	B	B	B	A	A	B	A	A	B	A	B	B	A	B	B	H	B	A	A	A	B	B	H
Excalibur_c5561_1013	3A	83.6988	390667240	B	H	H	B	A	A	B	A	A	B	B	B	A	A	A	B	A	A	B	B	H	H	B	B	B	B	A	A	B	A	A	B	A	B	B	A	B	B	H	B	A	A	A	B	B	H
Kukri_c5459_334	3A	83.6988	507469889	B	H	H	B	A	A	B	-	A	B	B	B	A	A	A	B	A	A	B	B	H	H	B	B	B	B	A	A	B	A	A	B	A	B	B	A	B	B	H	B	A	A	A	B	B	H
Ra_c11263_2353	3A	83.6988	511751412	B	H	H	B	A	A	B	-	A	B	B	B	A	A	A	B	A	A	B	B	H	H	B	B	B	B	A	A	B	A	A	B	A	B	B	A	B	B	H	B	A	A	A	B	B	H
Ra_c88203_1055	3A	83.6988	511074252	B	H	H	B	A	A	B	A	A	B	B	B	A	A	A	B	A	A	B	B	H	H	B	B	B	B	A	A	B	A	A	B	A	B	B	A	B	B	H	B	A	A	A	B	B	H
Ra_c88203_455	3A	83.6988	511075478	B	H	H	B	A	A	B	A	A	B	B	B	A	A	A	B	A	A	B	B	H	H	B	B	B	B	A	A	B	A	A	B	A	B	B	A	B	B	H	B	A	A	A	B	B	H
Ra_c88203_468	3A	83.6988	508253022	B	H	H	B	A	A	B	A	A	B	B	B	A	A	A	B	A	A	B	B	H	H	B	B	B	B	A	A	B	A	A	B	A	B	B	A	B	B	H	B	A	A	A	B	B	H
RAC875_c13895_763	3A	83.6988	513608185	B	H	H	B	A	A	B	A	A	B	B	B	A	A	A	B	A	A	B	B	H	H	B	B	B	B	A	A	B	A	A	B	A	B	B	A	B	B	H	B	A	A	A	B	B	H
TA005795-0543	3A	83.6988	510837390	B	H	H	B	A	A	B	A	A	B	B	B	A	A	A	B	A	A	B	B	H	H	B	B	B	B	A	A	B	A	A	B	A	B	B	A	B	B	H	B	A	A	A	B	B	H
Tdurum_contig57693_581	3A	83.6988	389912635	B	H	H	B	A	A	B	A	A	B	B	B	A	A	A	B	A	A	B	B	H	H	B	B	B	B	A	A	B	A	A	B	A	B	B	A	B	B	H	B	A	A	A	B	B	H
Tdurum_contig63129_238	3A	83.6988	510836724	B	H	-	B	A	A	B	A	A	B	B	B	A	A	A	B	A	A	B	B	-	H	B	B	B	B	A	A	B	A	A	B	A	B	B	A	B	B	-	B	A	A	A	B	B	H
Tdurum_contig68855_91	3A	83.6988	511603160	B	H	H	B	A	A	B	A	A	B	B	B	A	A	A	B	A	A	B	B	H	H	B	B	B	B	A	A	B	A	A	B	A	B	B	A	B	B	H	B	A	A	A	B	B	-
wsnp_RFL_Contig4814_5829093	3A	83.6988	394753317	B	H	H	B	A	A	B	A	A	B	B	B	A	A	A	B	A	A	B	B	H	H	B	B	B	B	A	A	B	A	A	B	A	B	B	A	B	B	H	B	A	A	A	B	B	H
Excalibur_c6501_477	3A	83.6989	507273477	B	H	H	B	A	A	B	A	A	B	B	B	A	A	A	B	A	A	B	B	H	H	B	B	B	B	A	A	B	A	A	B	A	B	B	A	B	B	H	B	A	A	A	B	B	H
BobWhite_c34548_96	3A	84.3086		B	H	H	B	A	A	B	A	A	B	B	B	A	A	A	B	A	A	B	B	H	H	B	B	B	B	A	A	B	A	A	B	A	B	B	A	B	B	H	B	A	A	A	B	B	H
BobWhite_rep_c49102_169	3A	84.3086	535326733	B	H	H	B	A	A	B	A	A	B	B	B	A	A	A	B	A	A	B	B	H	H	B	B	B	B	A	A	B	A	A	B	A	B	B	A	B	B	H	B	A	A	A	B	B	H
BS00009657_51	3A	84.3086	543178660	B	H	H	B	A	A	B	A	A	B	B	B	A	A	A	B	A	A	B	B	H	H	B	B	B	B	A	A	B	A	A	B	A	B	B	A	B	B	H	B	A	A	A	B	B	H
BS00068520_51	3A	84.3086	402689483	B	H	H	B	A	A	B	A	A	B	B	B	A	A	A	B	A	A	B	B	H	H	B	B	B	B	A	A	B	A	A	B	A	B	B	A	B	B	H	B	A	A	A	B	B	H
BS00110266_51	3A	84.3086	521304691	B	H	H	B	A	A	B	H	A	B	B	B	A	A	A	B	A	A	B	B	H	H	B	B	B	B	A	A	B	A	A	B	A	B	B	A	B	B	H	B	A	A	A	B	B	H
D_contig22919_290	3A	84.3086	394914092	B	H	H	B	A	A	B	A	A	B	B	B	A	A	A	B	A	A	B	B	H	H	B	B	B	B	A	A	B	A	A	B	A	B	B	A	B	B	H	B	A	A	A	B	B	H
Ex_c18484_2026	3A	84.3086		B	H	H	B	A	A	B	H	A	B	B	B	A	A	A	B	A	A	B	B	H	H	B	B	B	B	A	A	B	A	A	B	A	B	B	A	B	B	H	B	A	A	A	B	B	H
Ex_c18484_2048	3A	84.3086		B	H	H	B	A	A	B	H	A	B	B	B	A	A	A	B	A	A	B	B	H	H	B	B	B	B	A	A	B	A	A	B	A	B	B	A	B	B	H	B	A	A	A	B	B	H
Excalibur_c29205_537	3A	84.3086	395079265	B	H	H	B	A	A	B	A	A	B	B	B	A	A	A	B	A	A	B	B	H	H	B	B	B	B	A	A	B	A	A	B	A	B	B	A	B	B	H	B	A	A	A	B	B	H
Excalibur_c52446_519	3A	84.3086		B	H	H	B	A	A	B	A	A	B	B	B	A	A	A	B	A	A	B	B	H	H	B	B	B	B	A	A	B	A	A	B	A	B	B	A	B	B	H	B	A	A	A	B	B	H
Ku_c56370_1155	3A	84.3086	521719100	B	H	H	B	A	A	B	A	A	B	B	B	A	A	A	B	A	A	B	B	H	H	B	B	B	B	A	A	B	-	A	B	A	B	B	A	B	B	H	B	A	A	A	B	B	H
Kukri_c34195_357	3A	84.3086	536627390	B	H	H	B	A	A	B	A	A	B	B	B	A	A	A	B	A	A	B	B	H	H	B	B	B	B	A	A	B	A	A	B	A	B	B	A	B	B	H	B	A	A	A	B	B	H
Kukri_c80104_809	3A	84.3086		B	H	H	B	A	A	B	A	A	B	B	B	A	A	A	B	A	A	B	B	H	H	B	B	B	B	A	A	B	A	A	B	A	B	B	A	B	B	H	B	A	A	A	B	B	H
Ra_c5515_1723	3A	84.3086	514111128	B	H	H	B	A	A	B	A	A	B	B	B	A	A	A	B	A	A	B	B	H	H	B	B	B	B	A	A	B	A	A	B	A	B	B	A	B	B	H	B	A	A	A	B	B	H
Ra_c5515_2396	3A	84.3086	514111884	B	H	H	B	A	A	B	A	A	B	B	B	A	A	A	B	A	A	B	B	H	H	B	B	B	B	A	A	B	A	A	B	A	B	B	A	B	B	H	B	A	A	A	B	B	H
RAC875_c3427_734	3A	84.3086	541258101	B	H	H	B	A	A	B	A	A	B	B	B	A	A	A	B	A	A	B	B	H	H	B	B	B	B	A	A	B	A	A	B	A	B	B	A	B	B	H	B	A	A	A	B	B	H
Tdurum_contig57139_318	3A	84.3086	523556237	B	H	H	B	A	A	B	H	A	B	B	B	A	A	A	B	A	A	B	B	H	H	B	B	B	B	A	A	B	A	A	B	A	B	B	A	B	B	H	B	A	A	A	B	B	H
wsnp_CAP11_c318_261649	3A	84.3086		B	H	H	B	A	A	B	A	A	B	B	B	A	A	A	B	A	A	B	B	H	H	B	B	B	B	A	A	B	A	A	B	A	B	B	A	B	B	H	B	A	A	A	B	B	H
wsnp_Ex_c32003_40728918	3A	84.3086	514313560	B	H	H	B	A	A	B	A	A	B	B	B	A	A	A	B	A	A	B	B	H	H	B	B	B	B	A	A	B	A	A	B	A	B	B	A	B	B	H	B	A	A	A	B	B	H
wsnp_Ex_c9145_15214903	3A	84.3086	523548138	B	H	H	B	A	A	B	H	A	B	B	B	A	A	A	B	A	A	B	B	H	H	B	B	B	B	A	A	B	A	A	B	A	B	B	A	B	B	H	B	A	A	A	B	B	H
wsnp_Ex_rep_c69752_68711460	3A	84.3086	523556237	B	H	H	B	A	A	B	H	A	B	B	B	A	A	A	B	A	A	B	B	H	H	B	B	B	B	A	A	B	A	A	B	A	B	B	A	B	B	H	B	A	A	A	B	B	H
wsnp_Ku_c9433_15811664	3A	84.3086	523549954	B	H	H	B	A	A	B	A	A	B	B	B	A	A	A	B	A	A	B	B	H	H	B	B	B	B	A	A	B	A	A	B	A	B	B	A	B	B	H	B	A	A	A	B	B	H
wsnp_RFL_Contig429_4978628	3A	84.3086	528526667	B	H	H	B	A	A	B	A	A	B	B	B	A	A	A	B	A	A	B	B	H	H	B	B	B	B	A	A	B	A	A	B	A	B	B	A	B	B	H	B	A	A	A	B	B	H
BS00048031_51	3A	84.9259	535194640	B	H	H	B	A	A	B	H	A	B	B	B	A	A	A	B	A	A	B	B	H	H	B	B	B	B	A	A	B	A	A	B	A	B	B	A	B	B	H	B	A	A	A	B	B	H
wsnp_Ex_c15269_23491104	3A	85.551	533662322	B	H	H	B	A	A	B	A	A	B	B	B	A	A	A	B	A	A	B	B	H	H	B	B	B	B	A	A	B	A	A	B	A	B	A	A	B	H	H	B	A	A	A	B	B	H
Excalibur_c46082_440	3A	86.8012	556552568	B	H	H	B	A	A	B	A	A	B	B	B	A	A	A	B	A	A	B	B	H	H	B	B	B	B	A	A	B	A	A	B	A	B	A	A	B	H	H	B	A	A	A	A	B	H
GENE-4795_75	3A	86.8012	561544344	B	H	H	B	A	A	B	A	A	B	B	B	A	A	A	B	A	A	B	B	H	H	B	B	B	B	A	A	B	A	A	B	A	B	A	A	B	H	H	B	A	A	A	A	B	H
Tdurum_contig11121_739	3A	86.8012		B	H	H	B	A	A	B	A	A	B	B	B	A	A	A	B	A	A	B	B	H	H	B	B	B	B	A	A	B	A	A	B	A	B	A	A	B	H	H	B	A	A	A	A	B	H
Tdurum_contig11121_834	3A	86.8012	532448409	B	H	H	B	A	A	B	A	A	B	B	B	A	A	A	B	A	A	B	B	H	H	B	B	B	B	A	A	B	A	A	B	A	B	A	A	B	H	H	B	A	A	A	A	B	H
BS00064039_51	3A	88.0515	571302990	B	H	H	B	A	A	B	-	B	B	B	B	A	A	A	B	A	A	B	B	H	H	B	B	B	B	A	A	B	A	A	B	A	B	A	B	B	H	H	B	A	A	A	A	B	H
IAAV902	3A	88.0515	574256972	B	H	H	B	A	A	B	A	B	B	B	B	A	A	A	B	A	A	B	B	H	H	B	B	B	B	A	A	B	A	A	B	A	B	A	B	B	H	H	B	A	A	A	A	B	H
Excalibur_c39248_485	3A	95.7507		A	B	A	B	A	A	B	A	B	B	B	B	A	A	B	B	A	A	B	B	B	B	B	B	B	B	A	A	B	A	A	B	A	B	A	A	B	B	B	B	A	A	A	A	B	B
BS00000445_51	3A	98.1054	625533807	A	B	A	B	A	A	B	A	H	B	B	B	A	A	H	B	A	A	B	B	H	H	B	B	B	B	A	A	B	A	A	B	A	B	A	A	B	B	H	B	A	A	A	A	B	B
BS00001478_51	3A	98.1054	627254091	A	B	A	B	A	A	B	A	H	B	B	B	A	A	H	B	A	A	B	B	H	H	B	B	B	B	A	A	B	A	A	B	A	B	A	A	B	B	H	B	A	A	A	A	B	B
BS00056089_51	3A	98.1054	616492185	A	B	A	B	A	A	B	A	H	B	B	B	A	A	H	B	A	A	B	B	H	H	B	B	B	B	A	A	B	A	A	B	A	B	A	A	B	B	H	B	A	A	A	A	B	B
BS00061179_51	3A	98.1054		A	B	A	B	A	A	B	A	H	B	B	B	A	A	H	B	A	A	B	B	H	H	B	B	B	B	A	A	B	A	A	B	A	B	A	A	B	B	H	B	A	A	A	A	B	B
BS00074617_51	3A	98.1054		A	B	A	B	A	A	B	A	-	B	B	B	A	A	A	B	A	A	B	B	-	-	B	B	B	B	A	A	B	A	A	B	A	B	A	A	B	B	A	B	A	A	A	A	B	B
BS00080879_51	3A	98.1054	627825076	A	B	A	B	A	A	B	A	H	B	B	B	A	A	H	B	A	A	B	B	H	H	B	B	B	B	A	A	B	A	A	B	A	B	A	A	B	B	H	B	A	A	A	A	B	B
IAAV8483	3A	98.1054	620762018	A	B	A	B	A	A	B	A	-	B	B	B	A	A	H	B	A	A	B	B	H	H	B	B	B	B	A	A	B	A	A	B	A	B	A	A	B	B	H	B	A	A	A	A	B	B
RAC875_rep_c109433_782	3A	98.1054	481529075	A	B	A	B	A	A	B	H	H	B	B	B	A	A	H	B	A	A	B	B	H	H	B	B	B	B	A	A	B	A	A	B	A	B	A	A	B	B	H	B	A	A	A	A	B	B
wsnp_Ex_c8884_14841846	3A	98.1054	625239797	A	B	A	B	A	A	B	A	H	B	B	B	A	A	H	B	A	A	B	B	H	H	B	B	B	B	A	A	B	A	A	B	A	B	A	A	B	B	H	B	A	A	A	A	B	B
wsnp_Ex_c9483_15722127	3A	98.1054	627277878	A	B	A	B	A	A	B	A	H	B	B	B	A	A	H	B	A	A	B	B	H	H	B	B	B	B	A	A	B	A	A	B	A	B	A	A	B	B	H	B	A	A	A	A	B	B
wsnp_Ku_c18497_27803432	3A	98.1054	627819574	A	B	A	B	A	A	B	-	H	B	B	B	A	A	H	B	A	A	B	B	H	H	B	B	B	B	A	A	B	A	A	B	A	B	A	A	B	B	H	B	A	A	A	A	B	B
BobWhite_c8674_595	3A	99.3252	645093310	A	B	A	B	A	A	B	A	H	B	B	B	A	A	H	A	A	A	B	B	H	H	B	B	B	B	A	A	B	A	A	B	A	B	A	A	B	B	H	B	A	A	A	A	B	B
BS00063300_51	3A	101.155	654318780	A	B	A	B	A	A	B	-	H	B	B	B	A	A	H	A	A	A	B	B	H	H	B	B	B	B	A	A	B	A	A	B	A	A	A	A	B	B	H	B	A	A	A	A	B	B
BS00081688_51	3A	101.155	659040105	A	B	A	B	A	A	B	-	H	B	B	B	A	A	H	A	A	A	B	B	H	H	B	B	B	B	A	A	B	A	A	B	A	A	A	A	H	B	H	B	A	A	A	A	B	B
Excalibur_c17655_467	3A	101.155	659528641	A	B	A	B	A	A	B	A	H	B	B	B	A	A	H	A	A	A	B	B	H	H	B	B	B	B	A	A	B	A	A	B	A	A	A	A	H	B	H	B	A	A	A	A	B	B
Excalibur_c56240_176	3A	101.155	651627366	A	B	A	B	A	A	B	A	H	B	B	B	A	A	H	A	A	A	B	B	H	H	B	B	B	B	A	A	B	A	A	B	A	A	A	A	B	B	H	B	A	A	A	A	B	B
GENE-1549_110	3A	101.155	526049437	A	B	A	B	A	A	B	A	H	B	B	B	A	A	H	A	A	A	B	B	H	H	B	B	B	B	A	A	B	A	A	B	A	A	A	A	H	B	H	B	A	A	A	A	B	B
GENE-1981_131	3A	101.155	659162407	A	B	A	B	A	A	B	A	H	B	B	B	A	A	H	A	A	A	B	B	H	H	B	B	B	B	A	A	B	A	A	B	A	A	A	A	H	B	H	B	A	A	A	A	B	B
Kukri_rep_c69970_717	3A	101.155	650425816	A	B	A	B	A	A	B	A	H	B	B	B	A	A	H	A	A	A	B	B	H	H	B	B	B	B	A	A	B	A	A	B	A	A	A	A	B	B	H	B	A	A	A	A	B	B
RAC875_c47550_437	3A	101.155	653851706	A	B	A	B	A	A	B	H	H	B	B	B	A	A	H	A	A	A	B	B	H	H	B	B	B	B	A	A	B	A	A	B	A	A	A	A	B	B	H	B	A	A	A	A	B	B
wsnp_Ku_c8400_14280021	3A	101.155	659159911	A	B	A	B	A	A	B	A	H	B	B	B	A	A	H	A	A	A	B	B	H	H	B	B	B	B	A	A	B	A	A	B	A	A	A	A	H	B	H	B	A	A	A	A	B	B
BS00023337_51	3A	104.284	3847127	H	A	A	B	A	A	B	-	B	B	B	B	A	A	A	B	A	A	B	B	H	H	B	B	B	B	A	A	B	A	A	B	A	A	A	A	A	B	H	B	A	A	A	A	B	B
RAC875_c10194_673	3A	104.284	683071091	H	A	A	B	A	A	B	A	B	B	B	B	A	A	A	B	A	A	B	B	H	H	B	B	B	B	A	A	B	A	A	B	A	A	A	A	A	B	H	B	A	A	A	A	B	B
RAC875_c10194_910	3A	104.284	546321594	-	A	A	B	A	A	B	H	B	B	B	B	A	A	A	B	A	A	B	B	-	-	B	B	B	B	A	A	B	A	A	B	A	A	A	A	A	B	-	B	A	A	A	A	B	B
wsnp_Ex_c1894_3575749	3A	104.284		H	A	A	B	A	A	B	A	B	B	B	B	A	A	A	B	A	A	B	B	H	H	B	B	B	B	A	A	B	A	A	B	A	A	A	A	A	B	H	B	A	A	A	A	B	B
RAC875_rep_c90531_283	3A	107.995		A	A	A	B	A	A	B	B	B	B	A	B	A	A	A	B	A	B	B	A	B	A	B	B	B	B	A	A	B	A	A	B	B	A	A	A	A	B	-	B	A	A	A	A	B	B
BS00091887_51	3A	109.7	695729696	B	A	A	B	A	A	B	B	B	B	A	B	A	A	A	B	A	B	B	A	B	A	B	B	B	H	A	A	B	A	A	B	B	A	A	A	A	B	H	B	A	A	A	A	B	B
IACX6065	3A	109.7	695729821	B	A	A	B	A	A	B	B	B	B	A	B	A	A	A	B	A	B	B	A	B	A	B	B	B	H	A	A	B	A	A	B	B	A	A	A	A	B	H	B	A	A	A	A	B	B
wsnp_Ex_c20250_29303152	3A	109.7	696243396	B	A	A	B	A	A	B	B	B	B	A	B	A	A	A	B	A	B	B	A	B	A	B	B	B	H	A	A	B	A	A	B	B	A	A	A	A	B	H	B	A	A	A	A	B	B
Kukri_c49927_151	3A	110.85	697250101	B	A	A	B	A	A	B	B	B	B	B	B	A	A	A	B	A	B	B	A	B	A	B	B	B	H	A	A	B	A	A	B	B	A	A	A	A	B	H	B	A	A	A	A	B	B
BS00024548_51	3A	120.109		A	A	B	B	A	B	A	B	A	B	B	B	A	A	A	B	A	B	B	A	B	A	H	H	B	H	A	A	B	A	A	B	B	A	A	A	A	B	A	A	A	A	A	A	B	B
BS00067228_51	3A	120.109	700422393	A	A	B	B	A	B	A	B	A	B	B	B	A	A	A	B	A	B	B	A	B	A	H	H	B	H	A	A	B	A	A	B	B	A	A	A	A	B	A	A	A	A	A	A	B	B
Excalibur_rep_c110278_62	3A	120.684		A	A	B	B	A	B	A	B	A	B	B	B	A	A	A	B	A	B	B	A	B	A	A	A	B	A	A	A	B	A	A	B	B	A	A	A	A	B	A	A	A	A	A	A	B	B
BS00022862_51	3A	133.074	714156010	A	A	B	B	H	B	A	B	B	B	B	B	A	B	A	B	A	A	B	A	A	A	B	B	B	H	A	A	B	A	A	B	B	B	A	A	A	B	A	A	A	B	B	A	B	B
CAP11_c1022_117	3A	133.074	714156215	A	A	B	B	H	B	A	-	B	B	B	B	A	B	A	B	A	A	B	A	A	A	B	B	B	H	A	-	B	A	A	B	B	B	A	A	A	B	A	A	A	B	B	A	B	B
CAP11_c1022_66	3A	133.074	714156164	A	A	B	B	-	B	A	H	B	B	B	B	A	B	A	B	A	A	B	A	A	A	B	B	B	H	A	A	B	A	A	B	B	B	A	A	A	B	-	A	A	B	B	A	B	B
Kukri_rep_c106620_208	3A	133.074	714300447	A	A	B	B	-	B	A	B	B	B	B	B	A	B	A	B	A	A	B	A	A	A	B	B	B	-	A	A	B	A	A	B	B	B	A	A	A	B	A	A	A	B	B	A	B	B
Tdurum_contig42495_389	3A	133.074	714298946	A	A	B	B	H	B	A	B	B	B	B	B	A	B	A	B	A	A	B	A	A	A	B	B	B	H	A	A	B	A	A	B	B	B	A	A	A	B	A	A	A	B	B	A	B	B
wsnp_CAP8_c6939_3242530	3A	133.074	714155869	A	A	B	B	H	B	A	H	B	B	B	B	A	B	A	B	A	A	B	A	A	A	B	B	B	H	A	A	B	A	A	B	B	B	A	A	A	B	A	A	A	B	B	A	B	B
wsnp_Ex_c1903_3592518	3A	133.074	714302539	A	A	B	B	B	B	A	B	B	B	B	B	A	B	A	B	A	A	B	A	A	A	B	B	B	B	A	A	B	A	A	B	B	B	A	A	A	B	A	A	A	B	B	A	B	B
RAC875_c52195_324	3A	134.861	711404132	A	A	B	B	H	B	A	B	B	A	B	A	A	B	A	B	A	A	B	A	A	A	B	B	B	H	A	A	B	A	A	B	B	B	A	A	A	B	A	A	A	B	B	A	B	B
BS00076772_51	3A	135.463	711202928	A	A	B	B	H	B	A	-	B	A	B	A	A	B	A	A	A	A	B	A	A	A	B	H	B	H	A	A	B	A	A	B	B	B	A	A	A	B	A	A	A	B	B	A	B	B
RAC875_c24982_202	3A	156.441	724319594	H	A	B	B	A	B	A	H	B	B	B	B	B	A	A	B	A	A	H	B	H	B	A	B	B	A	B	B	B	A	A	B	B	B	B	A	A	B	A	A	A	B	B	B	B	B
BS00097939_51	3A	162.47	732042533	H	B	B	B	H	B	A	B	B	B	B	B	B	A	A	B	A	A	B	B	H	B	A	B	A	B	B	B	B	A	A	B	B	B	B	A	A	B	H	H	A	B	A	B	B	B
IAAV2423	3A	162.47	732779682	H	B	B	B	H	B	A	H	B	B	B	B	B	A	A	B	A	A	B	B	H	B	A	B	A	B	B	B	B	A	A	B	B	B	B	A	A	B	H	H	A	B	A	B	B	B
Ku_c26872_269	3A	162.47	729756626	-	B	B	B	-	B	A	B	B	B	B	B	B	A	A	B	A	A	B	B	A	B	A	B	A	B	B	B	B	A	A	B	B	B	B	A	A	B	H	-	A	B	A	B	B	B
RAC875_c56516_786	3A	162.47		-	B	B	B	-	B	A	B	B	B	B	B	B	A	A	B	A	A	B	B	-	B	A	B	A	B	B	B	B	A	A	B	B	B	B	A	A	B	-	-	A	B	A	B	B	B
RAC875_c61934_186	3A	163.675	733995625	H	B	B	B	H	B	A	B	B	B	B	B	B	A	A	B	A	A	B	B	H	B	A	B	A	B	B	B	B	A	A	B	B	B	B	A	A	B	H	H	A	B	A	B	B	B
RAC875_rep_c106170_204	3A	163.675		H	B	B	B	H	B	A	H	B	B	B	B	B	A	A	B	A	A	B	B	H	B	A	B	A	B	B	B	B	A	A	B	B	B	B	A	A	B	H	H	A	B	A	B	B	B
Ku_c12191_1123	3A	166.727	737800206	H	B	B	A	-	B	A	-	B	B	B	B	B	A	A	B	A	A	B	B	H	B	A	B	A	B	B	B	B	B	B	B	B	B	B	A	A	B	H	A	A	B	A	B	B	B
Tdurum_contig13646_225	3A	166.727	481053658	H	B	B	A	H	B	A	H	B	B	B	B	B	A	A	B	A	A	B	B	H	B	A	B	A	B	B	B	B	B	B	B	B	B	B	A	A	B	H	A	A	B	A	B	B	B
wsnp_Ex_rep_c66274_64426901	3A	166.727		H	B	B	A	H	B	A	H	B	B	B	B	B	A	A	B	A	A	B	B	H	B	A	B	A	B	B	B	B	B	B	B	B	B	B	A	A	B	H	A	A	B	A	B	B	B
Excalibur_c3556_520	3A	167.309	606299213	H	B	B	A	H	B	A	B	B	B	B	B	B	A	A	B	A	A	B	B	H	B	A	B	A	B	B	B	B	B	B	B	B	B	B	A	A	B	H	A	A	B	A	B	B	B
wsnp_Ku_c217_430915	3A	167.309	737969481	H	B	B	A	H	B	A	-	B	B	B	B	B	A	A	B	A	A	B	B	H	B	A	B	A	B	B	B	B	B	B	B	B	B	B	A	A	B	H	A	A	B	A	B	B	B
wsnp_Ra_c5454_9660204	3A	167.309	737968602	H	B	B	A	-	B	A	B	B	B	B	B	B	A	A	B	A	A	B	B	H	B	A	B	A	B	B	B	B	B	B	B	B	B	B	A	A	B	H	A	A	B	A	B	B	B
BS00074926_51	3A	169.054	739392416	H	B	A	A	H	B	A	B	B	B	B	B	B	A	A	B	A	A	B	B	H	B	A	B	A	B	B	B	B	B	B	B	B	B	B	A	A	B	H	A	A	B	A	B	B	B
Excalibur_c7610_143	3A	169.054	607002582	-	B	A	A	B	B	A	-	B	B	B	B	B	A	A	B	A	A	B	B	-	B	A	B	A	B	B	B	B	B	B	B	B	B	B	A	A	B	-	A	A	B	A	B	B	B
Kukri_s117946_404	3A	169.054	739734944	-	B	A	A	B	B	A	-	B	B	B	B	B	A	A	B	A	A	B	B	-	B	A	B	A	B	B	B	B	B	B	B	B	B	B	A	A	B	B	A	A	B	A	B	B	B
Tdurum_contig31235_99	3A	169.054	739397110	H	B	A	A	H	B	A	H	B	B	B	B	B	A	A	B	A	A	B	B	H	B	A	B	A	B	B	B	B	B	B	B	B	B	B	A	A	B	H	A	A	B	A	B	B	B
RAC875_rep_c69171_92	3B	0		-	-	B	A	B	A	B	A	-	A	A	A	A	B	A	A	A	A	A	A	A	A	H	A	-	A	A	A	B	B	-	A	A	A	-	H	A	B	A	A	-	-	H	-	A	A
BS00064776_51	3B	1.539		B	B	B	A	B	A	B	A	B	A	A	A	B	B	A	A	A	A	A	A	A	A	H	A	B	A	A	A	B	B	B	A	A	A	B	H	A	B	A	A	B	B	-	B	A	B
Kukri_c32803_150	3B	1.539		B	B	B	A	B	A	B	A	B	A	A	A	B	B	A	A	A	A	A	A	A	A	H	A	B	A	A	A	B	B	B	A	A	A	B	-	A	B	A	A	B	B	H	B	A	B
Excalibur_c6782_253	3B	2.7738		B	B	B	A	B	A	B	A	B	A	A	A	B	B	A	A	A	A	A	A	A	A	B	A	B	A	A	A	B	B	B	A	A	A	A	-	A	B	B	A	B	-	B	B	A	B
RAC875_rep_c69171_241	3B	6.6778		B	H	B	A	B	A	B	A	H	A	A	A	A	B	A	A	A	A	A	A	A	A	A	A	B	A	A	A	B	B	B	A	A	A	B	H	A	B	A	A	B	B	H	B	A	A
BS00098161_51	3B	6.6779		B	H	B	A	B	A	B	-	H	A	A	A	A	B	A	A	A	A	A	A	A	A	H	A	B	A	A	A	B	B	B	A	A	A	B	H	A	B	A	A	B	B	H	B	A	A
Tdurum_contig49804_392	3B	6.6779		B	H	B	A	B	A	B	-	B	A	A	A	A	B	A	A	A	A	A	A	A	A	H	A	B	A	A	A	B	B	B	A	A	A	B	H	A	B	A	A	B	B	H	B	A	A
Excalibur_rep_c71645_94	3B	7.2803		B	-	B	A	B	A	B	B	A	A	A	A	A	B	A	A	A	A	A	A	A	A	-	A	B	A	A	A	B	B	B	A	A	A	B	-	A	B	A	A	B	B	A	B	A	A
wsnp_Ra_c41135_48426638	3B	7.855	3408772	B	A	B	A	B	A	B	A	A	A	A	A	A	B	A	A	A	A	A	A	A	A	A	A	B	A	A	A	B	B	B	A	A	A	B	A	A	B	A	A	B	B	A	B	A	A
Excalibur_c18645_857	3B	10.1294		B	A	B	B	B	A	B	-	A	A	A	A	A	B	A	A	A	A	B	A	A	A	A	A	B	A	A	A	B	B	B	A	A	A	B	A	A	B	A	A	B	B	A	B	A	A
Tdurum_contig93830_1688	3B	10.1294	4490949	B	A	B	B	B	A	B	A	A	A	A	A	A	B	A	A	A	A	B	A	A	A	A	A	B	A	A	A	B	B	B	A	A	A	B	A	A	B	A	A	B	B	A	B	A	A
wsnp_Ex_c40595_47620787	3B	13.8399		B	B	B	B	B	A	B	A	-	B	A	H	A	B	A	A	A	A	B	A	A	A	B	A	B	A	A	B	B	B	B	A	A	A	B	A	A	B	A	A	B	B	H	B	A	A
tplb0059m03_1516	3B	15.6479	7372721	B	B	B	B	B	A	B	A	B	B	A	B	A	B	A	A	A	A	B	A	A	A	B	B	B	A	A	B	B	B	B	A	A	A	B	A	A	B	A	A	B	B	B	B	A	A
BS00058654_51	3B	18.5246		B	H	B	B	B	A	B	A	H	H	A	H	A	B	A	A	A	A	B	A	A	A	H	A	B	A	A	A	B	B	B	A	A	A	B	H	A	B	A	A	B	B	H	B	A	A
BS00079989_51	3B	18.5246		B	H	B	B	B	A	B	H	H	H	A	H	A	B	A	A	A	A	B	A	A	-	H	A	B	H	A	A	B	B	B	A	-	-	B	H	A	B	-	A	B	B	H	B	-	A
BS00083706_51	3B	18.5246		B	B	B	B	B	A	B	A	-	H	A	-	A	B	A	A	A	A	B	A	A	A	-	A	B	A	A	A	B	B	B	A	A	A	B	-	A	B	A	A	B	B	B	B	A	A
Excalibur_c94546_61	3B	18.5246	6178322	B	H	B	B	B	A	B	A	H	H	A	H	A	B	A	A	A	A	B	A	A	A	H	A	B	A	A	A	B	B	B	A	A	A	B	H	A	B	A	A	B	B	H	B	A	A
Ra_c58335_189	3B	18.5246	5954045	B	H	B	B	B	A	B	A	H	H	A	H	A	B	A	A	A	A	B	A	A	A	H	A	B	A	A	A	B	B	B	A	A	A	B	H	A	B	A	A	B	B	H	B	A	A
RAC875_c14696_369	3B	18.5246	4195138	B	-	B	B	B	A	B	A	-	H	A	H	A	B	A	A	A	A	B	A	A	A	H	A	B	A	A	A	B	B	B	A	A	A	B	H	A	B	A	A	B	B	H	B	A	A
RAC875_c3956_275	3B	18.5246		B	H	B	B	B	A	B	-	H	H	A	H	A	B	A	A	A	A	B	A	A	A	H	A	B	A	A	A	B	B	B	A	A	A	B	H	A	B	A	A	B	B	H	B	A	A
TA003763-0481	3B	18.5246		B	H	B	B	B	A	B	H	H	H	A	H	A	B	A	A	A	A	B	A	A	A	H	A	B	A	A	A	B	B	B	A	A	A	B	H	A	B	A	A	B	B	H	B	A	A
Tdurum_contig34149_219	3B	18.5246	6392856	B	B	B	B	B	A	B	A	B	B	A	B	A	B	A	A	A	A	B	A	A	A	B	A	B	A	A	A	B	B	B	A	A	A	B	B	A	B	A	A	B	B	B	B	A	A
wsnp_Ex_c2723_5047696	3B	18.5246	6680189	B	H	B	B	B	A	B	A	H	-	A	H	A	B	A	A	A	A	B	A	A	A	H	A	B	A	A	A	B	B	B	A	A	A	B	H	A	B	A	A	B	B	H	B	A	A
Ra_c17608_960	3B	19.1575		B	H	B	B	B	A	B	A	H	H	A	H	A	B	A	A	A	A	B	A	A	A	H	A	B	A	A	B	B	B	B	A	A	A	B	A	A	B	A	A	B	B	H	B	A	A
BobWhite_c3902_175	3B	20.4078	7604686	B	H	B	B	B	A	B	A	B	H	A	H	A	B	A	A	A	A	B	A	A	A	H	A	B	A	A	B	B	B	B	A	A	A	B	A	A	B	A	A	B	B	H	B	A	A
BS00098868_51	3B	21.0251		B	H	B	B	B	A	B	A	B	H	A	H	A	B	A	A	A	A	B	A	A	A	H	B	B	A	A	B	B	B	B	A	A	A	B	A	A	B	A	A	B	B	H	B	A	A
BobWhite_c17021_269	3B	21.6424	13517592	B	H	B	B	B	A	B	B	B	H	A	H	A	B	A	A	A	A	B	A	A	A	H	B	B	A	A	B	B	B	B	A	A	A	B	A	A	B	A	A	B	B	H	B	A	A
BobWhite_c7454_492	3B	21.6424		B	H	B	B	B	A	B	H	B	H	A	H	A	B	A	A	A	A	B	A	A	A	H	B	B	A	A	B	B	B	B	A	A	A	B	A	A	B	A	A	B	B	H	B	A	A
BS00011438_51	3B	21.6424	7373468	B	-	B	B	B	A	B	A	B	H	A	H	A	B	A	A	A	A	B	A	A	A	A	B	B	A	A	B	B	B	B	A	A	A	B	A	A	B	A	A	B	B	H	B	A	A
BS00062963_51	3B	21.6424		B	B	B	B	B	A	B	A	B	H	A	H	A	B	A	A	A	A	B	A	A	A	-	B	B	A	A	B	B	B	B	A	A	A	B	A	A	B	A	A	B	B	B	B	A	A
BS00105741_51	3B	21.6424	9092628	B	H	B	B	B	A	B	A	B	H	A	H	A	B	A	A	A	A	B	A	A	A	H	B	B	A	A	B	B	B	B	A	A	A	B	A	A	B	A	A	B	B	H	B	A	A
BS00111294_51	3B	21.6424	8811576	B	H	B	B	B	A	B	A	B	H	A	H	A	B	A	A	A	A	B	A	A	A	H	B	B	A	A	B	B	B	B	A	A	A	B	A	A	B	A	A	B	B	H	B	A	A
Tdurum_contig10608_1081	3B	21.6424	7077128	B	H	B	B	B	A	B	A	B	H	A	H	A	B	A	A	A	A	B	A	A	A	H	B	B	A	A	B	B	B	B	A	A	A	B	A	A	B	A	A	B	B	H	B	A	A
Tdurum_contig14251_320	3B	21.6424		B	-	B	B	B	A	B	A	B	-	A	-	A	B	A	A	A	A	B	A	A	A	-	B	B	A	A	B	B	B	B	A	A	A	B	A	A	B	A	A	B	B	-	B	A	A
Tdurum_contig14251_431	3B	21.6424		B	H	B	B	B	A	B	A	B	H	A	H	A	B	A	A	A	A	B	A	A	A	H	B	B	A	A	B	B	B	B	A	A	A	B	A	A	B	A	A	B	B	H	B	A	A
tplb0059m03_622	3B	21.6424	7373615	B	-	B	B	B	A	B	A	B	H	A	H	A	B	A	A	A	A	B	A	A	A	-	B	B	A	A	B	B	B	B	A	A	A	B	A	A	B	A	A	B	B	H	B	A	A
wsnp_Ex_c8386_14127329	3B	21.6424	7188520	B	H	B	B	B	A	B	H	B	H	A	H	A	B	A	A	A	A	B	A	A	A	H	B	B	A	A	B	B	B	B	A	A	A	B	A	A	B	A	A	B	B	H	B	A	A
wsnp_Ex_rep_c67625_66279491	3B	21.6424	8340667	B	H	B	B	B	A	B	A	B	H	A	H	A	B	A	A	A	A	B	A	A	A	H	B	B	A	A	B	B	B	B	A	A	A	B	A	A	B	A	A	B	B	H	B	A	A
Excalibur_c8314_405	3B	22.2377	7064041	B	B	B	B	B	A	B	B	B	A	A	A	A	B	A	A	A	A	B	A	A	A	A	B	B	A	A	B	B	B	B	A	A	A	B	A	A	B	A	A	B	B	B	B	A	A
wsnp_Ex_rep_c103892_88739043	3B	22.2377	7064704	B	H	B	B	B	A	B	H	B	A	A	-	A	B	A	A	A	A	B	A	-	-	A	B	B	A	A	B	B	B	B	A	A	A	B	A	A	B	A	A	B	B	H	B	-	A
wsnp_Ku_c55746_59522526	3B	22.2377	7064123	B	-	B	B	B	A	B	-	B	A	A	A	A	B	A	A	A	A	B	A	A	A	A	B	B	A	A	B	B	B	B	A	A	A	B	A	A	B	A	A	B	B	-	B	A	A
RFL_Contig5709_3005	3B	25.6677	9780261	B	-	B	B	B	A	B	A	B	A	A	-	A	B	A	B	A	A	B	A	A	A	A	A	B	A	A	B	B	B	B	A	A	A	B	A	A	B	A	A	B	B	H	A	A	A
RFL_Contig5709_3312	3B	25.6678	661962386	B	H	B	B	B	A	B	A	B	A	A	H	A	B	A	B	A	A	B	A	A	A	H	A	B	A	A	B	B	B	B	A	A	A	B	A	A	B	A	A	B	B	H	A	A	A
BobWhite_c9711_71	3B	26.8875	9780220	B	B	B	B	B	A	B	A	B	B	A	B	A	B	A	B	A	A	B	A	A	A	B	A	B	A	A	B	B	B	B	A	A	A	B	A	A	B	A	A	B	B	-	A	A	A
RAC875_c4389_1412	3B	30.0562	11087167	B	B	B	B	B	A	B	A	B	H	A	H	A	B	A	B	A	A	B	A	A	A	H	A	B	A	A	B	B	B	B	A	A	A	B	A	A	B	A	A	B	B	H	A	A	A
tplb0043c20_1046	3B	30.0562	8971625	B	B	B	B	B	A	B	A	B	H	A	H	A	B	A	B	A	A	B	A	A	A	H	A	B	A	A	B	B	B	B	A	A	A	B	A	A	B	A	A	B	B	H	A	A	A
Tdurum_contig79629_538	3B	30.0563	10956668	B	B	B	B	B	A	B	A	B	-	A	-	A	B	A	B	A	A	B	A	A	A	B	A	B	A	A	B	B	B	B	A	A	A	B	A	A	B	A	A	B	B	A	A	A	A
RAC875_c53353_78	3B	30.666	9934273	B	B	B	B	B	A	B	-	B	H	A	H	A	B	A	B	A	A	B	A	A	A	H	A	B	A	A	B	B	B	B	A	A	A	B	A	A	B	A	A	B	B	H	A	A	A
RAC875_c5966_1854	3B	30.666	9937019	B	B	B	B	B	A	B	-	B	H	A	H	A	B	A	B	A	A	B	A	A	A	H	A	B	A	A	B	B	B	B	A	A	A	B	A	A	B	A	A	B	B	H	A	A	A
GENE-1851_76	3B	31.2758	8973187	B	B	B	B	B	A	B	H	B	H	A	H	A	B	A	B	A	A	B	A	A	A	H	A	B	A	A	B	B	B	B	A	A	A	B	A	A	B	A	A	B	B	H	A	A	A
wsnp_Ex_c3005_5548573	3B	35.8941		B	B	B	B	B	A	B	A	B	H	A	B	A	B	A	B	A	A	H	A	A	A	-	A	B	A	B	B	B	B	B	B	A	A	B	A	A	B	A	A	A	B	H	B	A	A
BS00018764_51	3B	36.4689	16455416	B	B	B	B	B	A	B	A	B	H	A	B	A	B	A	B	A	A	H	A	A	A	H	A	B	A	B	B	B	B	B	B	A	A	B	A	B	B	A	A	A	B	H	B	A	A
BS00022387_51	3B	36.4689	17081456	B	B	B	B	B	A	B	A	B	H	A	B	A	B	A	B	A	A	H	A	A	A	H	A	B	A	B	B	B	B	B	B	A	A	B	A	B	B	A	A	A	B	H	B	A	A
Excalibur_c50808_326	3B	36.4689	16055800	B	B	B	B	B	A	B	A	B	H	A	B	A	B	A	B	A	A	H	A	A	A	H	A	B	A	B	B	B	B	B	B	A	A	B	A	B	B	A	A	A	B	H	B	A	A
Excalibur_rep_c104532_80	3B	36.4689		B	B	B	B	B	A	B	A	B	H	A	B	A	B	A	B	A	A	H	A	A	A	H	A	B	A	B	B	B	B	B	B	A	A	B	A	B	B	A	A	A	B	H	B	A	A
Excalibur_rep_c67448_528	3B	36.4689	16453620	B	B	B	B	B	A	B	A	B	H	A	B	A	B	A	B	A	A	H	A	A	A	H	A	B	A	B	B	B	B	B	B	A	A	B	A	B	B	A	A	A	B	H	B	A	A
IAAV6442	3B	36.4689	11750984	B	B	B	B	B	A	B	A	B	H	A	B	A	B	A	B	A	A	H	A	A	A	H	A	B	A	B	B	B	B	B	B	A	A	B	A	B	B	A	A	A	B	H	B	A	A
wsnp_Ku_c663_1368085	3B	37.0371		B	B	B	B	B	A	B	A	B	B	A	B	A	B	A	B	A	A	H	A	A	A	H	A	B	A	B	B	B	B	B	B	A	A	B	A	A	B	A	A	A	B	H	B	A	A
wsnp_BE497169B_Ta_2_2	3B	38.762	408183418	B	B	B	B	B	A	B	A	B	A	A	B	A	B	A	B	A	A	A	A	A	A	A	A	B	A	B	B	B	B	B	B	A	A	B	A	B	B	A	A	A	B	A	B	A	A
Kukri_rep_c101341_425	3B	39.3175	16451379	B	B	B	B	B	A	B	A	B	A	A	B	A	B	A	B	A	A	A	A	A	A	A	A	B	A	B	B	B	B	B	B	A	A	B	A	B	B	A	A	A	B	-	B	A	A
BobWhite_c25670_425	3B	41.083	12276550	B	B	B	B	B	A	B	A	B	H	A	B	A	B	A	B	A	A	H	A	A	A	H	A	B	A	B	B	B	A	A	B	A	A	B	A	B	B	A	A	A	B	H	B	A	A
Excalibur_c25566_1000	3B	41.083	17562178	B	B	B	B	B	A	B	A	B	H	A	B	A	B	A	B	A	A	H	A	A	A	H	A	B	A	B	B	B	A	A	B	A	A	B	A	B	B	A	A	A	B	H	B	A	A
BS00039218_51	3B	42.2326		B	B	B	B	B	A	B	A	B	H	A	B	A	B	A	B	A	A	H	A	A	A	H	A	B	A	B	B	B	A	A	B	B	A	B	A	B	B	A	A	A	A	H	B	A	A
IAAV3924	3B	44.0191	20450624	B	B	B	B	B	A	B	A	B	H	A	B	A	B	A	B	A	A	H	A	A	A	H	A	B	A	B	B	B	A	A	B	B	A	B	A	B	B	A	A	A	A	H	B	A	A
BS00011596_51	3B	48.4054		B	B	B	B	B	A	B	A	B	A	A	B	A	A	A	B	A	A	A	A	A	A	A	A	B	A	B	B	A	A	A	B	B	A	B	A	B	B	A	B	A	A	A	B	A	A
RFL_Contig876_422	3B	48.4054	24013218	B	B	B	B	B	A	B	A	B	-	A	B	A	A	A	B	A	A	H	A	A	A	H	A	B	A	B	B	A	A	A	B	B	A	B	A	B	B	A	B	A	A	-	B	A	A
TA001028-0737	3B	48.4054		B	B	B	B	B	A	B	A	B	H	A	B	A	A	A	B	A	A	H	A	A	A	H	A	B	A	B	B	A	A	A	B	B	A	B	A	B	B	A	B	A	A	H	B	A	A
Tdurum_contig100212_141	3B	54.2004	27995283	B	B	B	A	B	A	B	A	A	A	A	A	A	A	A	B	A	B	-	A	A	A	B	A	B	A	B	B	A	A	A	B	B	-	B	A	B	B	A	B	A	A	B	B	A	A
BS00065934_51	3B	55.337		B	B	B	A	B	A	B	A	A	A	A	A	A	A	A	B	B	B	B	A	A	A	B	A	B	A	B	B	A	A	A	B	B	B	B	A	B	B	A	B	A	A	B	B	B	A
Excalibur_c24391_321	3B	55.337	31105305	B	B	B	A	B	A	B	A	A	A	A	A	A	A	A	B	H	B	H	A	A	A	B	A	B	A	B	B	A	A	A	B	B	H	B	A	B	B	A	B	A	A	B	B	B	A
IAAV1043	3B	55.337		B	B	B	A	B	A	B	A	A	A	A	A	A	A	A	B	B	B	B	A	A	A	B	A	B	A	B	B	A	A	A	B	B	-	B	A	B	B	A	B	A	A	B	B	B	A
RAC875_c5799_224	3B	55.337	19885883	B	B	B	A	B	A	B	A	A	A	A	A	A	A	A	B	H	B	H	A	A	A	B	A	B	A	B	B	A	A	A	B	B	H	B	A	B	B	A	B	A	A	B	B	B	A
RFL_Contig29_1062	3B	61.286	40908558	B	A	B	A	B	B	B	B	A	A	A	A	A	A	A	B	H	B	B	A	B	A	B	A	B	A	B	B	A	A	A	B	B	H	B	A	A	H	A	B	A	H	B	B	B	A
BS00022242_51	3B	63.788	41071278	B	A	B	A	B	A	H	B	A	A	A	A	H	A	A	B	H	B	B	A	B	A	B	A	B	A	B	B	B	A	A	B	B	H	B	B	A	A	A	B	A	H	B	B	B	A
RAC875_c59977_598	3B	67.5928		B	A	B	A	B	A	H	B	A	B	A	B	H	B	A	B	H	B	A	A	B	A	B	A	B	A	B	B	B	A	A	B	B	H	B	B	A	A	A	B	A	H	B	B	B	A
IAAV8162	3B	68.2026	50910165	B	A	B	A	B	A	H	B	A	B	A	B	H	B	A	B	H	B	A	A	B	A	B	A	B	A	B	B	B	A	A	B	B	H	B	B	A	A	A	B	B	H	B	B	B	A
wsnp_Ex_c2820_5215394	3B	68.8123	60254983	B	A	B	A	B	A	H	A	A	B	A	B	H	B	A	B	H	B	A	A	B	A	B	A	B	A	B	B	B	A	A	B	B	H	B	B	A	A	A	B	B	H	B	B	B	A
BobWhite_rep_c55395_200	3B	69.4148	50231211	B	A	B	A	B	A	H	B	A	B	A	B	H	B	A	B	H	B	A	A	B	A	B	A	B	A	B	B	B	A	A	B	B	H	B	B	A	A	A	B	B	H	B	B	B	A
BS00016407_51	3B	69.4148	50533639	B	A	B	A	B	A	H	B	A	B	A	B	H	B	A	B	H	B	A	A	B	A	B	A	B	A	B	B	B	A	A	B	B	H	B	B	A	A	A	B	B	H	B	B	B	A
Excalibur_c8284_580	3B	69.4148		B	A	B	A	B	A	A	B	A	B	A	B	A	B	A	B	-	B	A	A	B	A	B	A	B	A	B	B	B	A	A	B	B	-	B	B	A	A	A	B	B	H	B	B	B	A
Kukri_c46948_558	3B	69.4148	53484742	B	A	B	A	B	A	H	B	A	B	A	B	H	B	A	B	H	B	A	A	B	A	B	A	B	A	B	B	B	A	A	B	B	H	B	B	A	A	A	B	B	H	B	B	B	A
RAC875_c10246_839	3B	69.4148	60253515	B	A	B	A	B	A	-	-	A	B	A	B	-	B	A	B	-	B	A	A	B	A	B	A	B	A	B	B	B	A	A	B	B	H	B	B	A	A	A	B	B	H	B	B	B	A
wsnp_Ex_c4063_7344641	3B	69.4148	64175799	B	A	B	A	B	A	-	B	A	B	A	B	-	B	A	B	-	B	A	A	B	A	B	A	B	A	B	B	B	A	A	B	B	B	B	B	A	A	A	B	B	H	B	B	B	A
GENE-4918_283	3B	71.2012	29701572	B	A	B	A	B	A	B	B	A	B	A	B	H	B	A	B	H	B	A	A	B	A	B	A	B	A	B	B	B	A	A	B	B	B	B	B	A	A	A	B	B	-	B	B	B	A
Tdurum_contig56933_86	3B	72.3378	48886133	B	A	B	A	B	A	B	B	A	B	A	B	B	B	A	B	-	B	A	A	B	A	B	A	B	A	B	B	B	A	A	B	B	B	B	B	A	A	A	B	A	-	B	B	B	A
Kukri_c23228_137	3B	73.4744	59962915	B	A	B	A	B	A	B	B	A	B	A	B	B	B	A	B	B	B	A	A	B	A	B	A	B	A	B	B	B	A	A	B	B	B	B	B	A	A	A	B	B	B	B	B	B	A
Kukri_c33486_128	3B	73.4745		B	A	B	A	B	A	B	B	A	B	A	B	B	B	A	B	B	B	A	A	B	A	B	A	B	A	B	B	B	A	A	B	B	B	B	B	A	A	A	B	B	-	B	B	B	A
RAC875_c34484_67	3B	73.4745		B	A	B	A	B	A	-	B	A	B	A	B	B	B	A	B	B	B	A	A	B	A	B	A	B	A	B	B	B	A	A	B	B	B	B	B	A	A	A	B	B	B	B	B	B	A
Kukri_rep_c74178_178	3B	74.6795	103244640	B	A	B	A	B	A	B	B	A	B	A	B	-	B	A	B	-	B	A	A	B	A	B	A	B	A	A	B	B	A	A	B	B	-	B	B	A	A	A	B	B	-	B	B	B	A
CAP8_rep_c4453_136	3B	75.8846	244985329	B	A	B	A	B	A	A	B	A	B	A	B	A	B	A	B	A	B	A	A	B	A	B	A	A	A	A	B	B	A	A	B	B	A	B	B	A	A	A	B	B	A	B	B	B	A
Excalibur_c24830_415	3B	75.8846	244990683	B	A	B	A	B	A	A	B	A	B	A	B	A	B	A	B	A	B	A	A	B	A	B	A	A	A	A	B	B	A	A	B	B	A	B	B	A	A	A	B	B	A	B	B	B	A
Excalibur_c48841_1380	3B	75.8846	244990833	B	A	B	A	B	A	A	B	A	B	A	B	A	B	A	B	A	B	A	A	B	A	B	A	A	A	A	B	B	A	A	B	B	A	B	B	A	A	A	B	B	A	B	B	B	A
wsnp_RFL_Contig3336_3426054	3B	76.9959	79953374	B	A	B	A	B	A	A	B	A	B	A	B	A	B	A	B	-	B	A	A	B	A	B	A	B	A	A	B	B	A	A	B	B	A	B	B	A	A	A	B	B	A	B	B	B	A
BobWhite_c10402_140	3B	77.5577	100968234	B	A	B	A	B	A	H	H	A	B	A	B	H	B	A	B	A	B	A	A	B	A	B	A	B	A	A	B	B	A	A	B	B	H	B	B	A	A	A	B	B	-	B	B	B	A
Kukri_c21467_571	3B	77.5577		B	A	B	A	B	A	A	H	A	B	A	B	-	B	A	B	A	B	A	A	B	A	B	A	B	A	A	B	B	A	A	B	B	-	B	B	A	A	A	B	B	-	B	B	B	A
wsnp_Ex_c54357_57265797	3B	77.5577	138503039	B	A	B	A	B	A	A	-	A	B	A	B	-	B	A	B	-	B	A	A	B	A	B	A	B	A	A	B	B	A	A	B	B	-	B	B	A	A	A	B	B	-	B	B	B	A
wsnp_Ex_c6065_10623213	3B	77.5577	79128842	B	A	B	A	B	A	A	A	A	B	A	B	A	B	A	B	A	B	A	A	B	A	B	A	B	A	A	B	B	A	A	B	B	A	B	B	A	A	A	B	B	A	B	B	B	A
BS00023074_51	3B	78.153	140427091	B	A	B	A	B	A	H	B	A	B	A	B	H	B	A	B	H	B	A	A	B	A	B	A	B	A	A	B	B	A	A	B	B	H	B	B	A	A	A	B	B	H	B	B	B	A
BS00025114_51	3B	78.153		B	A	B	A	B	A	H	B	A	B	A	B	H	B	A	B	H	B	A	A	B	A	B	A	B	A	A	B	B	A	A	B	B	H	B	B	A	A	A	B	B	H	B	B	B	A
BS00046052_51	3B	78.153	82852102	B	A	B	A	B	A	H	B	A	B	A	B	H	B	A	B	H	B	A	A	B	A	B	A	B	A	A	B	B	A	A	B	B	H	B	B	A	A	A	B	B	H	B	B	B	A
BS00066108_51	3B	78.153	95155597	B	A	B	A	B	A	H	B	A	B	A	B	H	B	A	B	H	B	A	A	B	A	B	A	B	A	A	B	B	A	A	B	B	H	B	B	A	A	A	B	B	H	B	B	B	A
BS00086717_51	3B	78.153	140490793	B	A	B	A	B	A	H	B	A	B	A	B	H	B	A	B	H	B	A	A	B	A	B	A	B	A	A	B	B	A	A	B	B	H	B	B	A	A	A	B	B	H	B	B	B	A
Excalibur_rep_c68583_1067	3B	78.153	75956457	B	A	B	A	B	A	H	B	A	B	A	B	H	B	A	B	-	B	A	A	B	A	B	A	B	A	A	B	B	A	A	B	B	H	B	B	A	A	A	B	B	H	B	B	B	A
GENE-4774_69	3B	78.153	64200505	B	A	B	A	B	A	H	B	A	B	A	B	H	B	A	B	H	B	A	A	B	A	B	A	B	A	A	B	B	A	A	B	B	H	B	B	A	A	A	B	B	H	B	B	B	A
IAAV51	3B	78.153	140686863	B	A	B	A	B	A	H	B	A	B	A	B	H	B	A	B	H	B	A	A	B	A	B	A	B	A	A	B	B	A	A	B	B	H	B	B	A	A	A	B	B	H	B	B	B	A
Kukri_c16742_415	3B	78.153		B	A	B	A	B	A	H	B	A	B	A	B	H	B	A	B	H	B	A	A	B	A	B	A	B	A	A	B	B	A	A	B	B	H	B	B	A	A	A	B	B	H	B	B	B	A
Kukri_c23958_187	3B	78.153	106282784	B	A	B	A	B	A	H	-	A	B	A	B	H	B	A	B	H	B	A	A	B	A	B	A	B	A	A	B	B	A	A	B	B	H	B	B	A	A	A	B	B	H	B	B	B	A
Kukri_c3168_521	3B	78.153		B	A	B	A	B	A	H	B	A	B	A	B	H	B	A	B	H	B	A	A	B	A	B	A	B	A	A	B	B	A	A	B	B	H	B	B	A	A	A	B	B	H	B	B	B	A
Kukri_c35146_2094	3B	78.153	151226394	B	A	B	A	B	A	H	-	A	B	A	B	H	B	A	B	H	B	A	A	B	A	B	A	B	A	A	B	B	A	A	B	B	H	B	B	A	A	A	B	B	H	B	B	B	A
Tdurum_contig10426_280	3B	78.153	107399433	B	A	B	A	B	A	H	B	A	B	A	B	H	B	A	B	H	B	A	A	B	A	B	A	B	A	A	B	B	A	A	B	B	H	B	B	A	A	A	B	B	H	B	B	B	A
Tdurum_contig43263_243	3B	78.153		B	A	B	A	B	A	H	-	A	B	A	B	H	B	A	B	H	B	A	A	B	A	B	A	B	A	A	B	B	A	A	B	B	H	B	B	A	A	A	B	B	H	B	B	B	A
Tdurum_contig45431_607	3B	78.153	140688768	B	A	B	A	B	A	H	B	A	B	A	B	H	B	A	B	H	B	A	A	B	A	B	A	B	A	A	B	B	A	A	B	B	H	B	B	A	A	A	B	B	H	B	B	B	A
tplb0046p09_685	3B	78.153	152209979	B	A	B	A	B	A	H	B	A	B	A	B	H	B	A	B	H	B	A	A	B	A	B	A	B	A	A	B	B	A	A	B	B	H	B	B	A	A	A	B	B	H	B	B	B	A
wsnp_Ex_c15944_24350833	3B	78.153		B	A	B	A	B	A	H	-	A	B	A	B	H	B	A	B	H	B	A	A	B	A	B	A	B	A	A	B	B	A	A	B	B	H	B	B	A	A	A	B	B	H	B	B	B	A
wsnp_Ex_c21930_31102213	3B	78.153	95150976	B	A	B	A	B	A	H	B	A	B	A	B	H	B	A	B	H	B	A	A	B	A	B	A	B	A	A	B	B	A	A	B	B	H	B	B	A	A	A	B	B	H	B	B	B	A
wsnp_Ex_c21930_31102685	3B	78.153	95151448	B	A	B	A	B	A	H	B	A	B	A	B	H	B	A	B	H	B	A	A	B	A	B	A	B	A	A	B	B	A	A	B	B	H	B	B	A	A	A	B	B	H	B	B	B	A
wsnp_Ex_c4927_8772847	3B	78.153		B	A	B	A	B	A	H	B	A	B	A	B	H	B	A	B	H	B	A	A	B	A	B	A	B	A	A	B	B	A	A	B	B	H	B	B	A	A	A	B	B	H	B	B	B	A
wsnp_Ex_c5657_9942445	3B	78.153	137603450	B	A	B	A	B	A	H	B	A	B	A	B	H	B	A	B	H	B	A	A	B	A	B	A	B	A	A	B	B	A	A	B	B	H	B	B	A	A	A	B	B	H	B	B	B	A
wsnp_Ex_c7967_13522958	3B	78.153	141125995	B	A	B	A	B	A	H	B	A	B	A	B	H	B	A	B	H	B	A	A	B	A	B	A	B	A	A	B	B	A	A	B	B	H	B	B	A	A	A	B	B	H	B	B	B	A
wsnp_JD_c2623_3541255	3B	78.153	114728284	B	A	B	A	B	A	H	B	A	B	A	B	H	B	A	B	H	B	A	A	B	A	B	A	B	A	A	B	B	A	A	B	B	H	B	B	A	A	A	B	B	H	B	B	B	A
wsnp_JD_c30422_23944042	3B	78.153	100966512	B	A	B	A	B	A	H	B	A	B	A	B	H	B	A	B	H	B	A	A	B	A	B	A	B	A	A	B	B	A	A	B	B	H	B	B	A	A	A	B	B	H	B	B	B	A
wsnp_JD_c7325_8422075	3B	78.153	140688768	B	A	B	A	B	A	H	B	A	B	A	B	H	B	A	B	H	B	A	A	B	A	B	A	B	A	A	B	B	A	A	B	B	H	B	B	A	A	A	B	B	H	B	B	B	A
BS00011570_51	3B	78.7483	68590601	B	A	B	A	B	A	H	B	A	B	A	B	H	B	A	B	H	B	A	A	B	A	B	A	B	A	A	B	B	A	A	B	B	H	B	B	A	A	A	B	B	H	B	B	B	A
BS00102622_51	3B	78.7483	68464206	B	A	B	A	B	A	H	B	A	B	A	B	H	B	A	B	H	B	A	A	B	A	B	A	B	A	A	B	B	A	A	B	B	H	B	B	A	A	A	B	B	H	B	B	B	A
BS00011111_51	3B	79.3507	60866921	B	A	B	A	B	A	H	B	A	B	A	B	H	B	A	B	H	B	A	A	B	A	B	A	B	A	B	B	B	A	A	B	B	H	B	B	A	A	A	B	B	H	B	B	B	A
BS00079014_51	3B	79.3507	60142171	B	A	B	A	B	A	H	B	A	B	A	B	H	B	A	B	H	B	A	A	B	A	B	A	B	A	B	B	B	A	A	B	B	H	B	B	A	A	A	B	B	H	B	B	B	A
IAAV1405	3B	79.3507		B	A	B	A	B	A	H	H	A	B	A	B	H	B	A	B	H	B	A	A	B	A	B	A	B	A	B	B	B	A	A	B	B	H	B	B	A	A	A	B	B	H	B	B	B	A
Kukri_c54571_224	3B	79.3507	36582514	B	A	B	A	B	A	H	B	A	B	A	B	H	B	A	B	H	B	A	A	B	A	B	A	B	A	B	B	B	A	A	B	B	H	B	B	A	A	A	B	B	H	B	B	B	A
RAC875_c10628_1253	3B	79.3507	36582268	B	A	B	A	B	A	H	H	A	B	A	B	H	B	A	B	H	B	A	A	B	A	B	A	B	A	B	B	B	A	A	B	B	H	B	B	A	A	A	B	B	H	B	B	B	A
wsnp_Ex_c4069_7355431	3B	79.3507		B	A	B	A	B	A	-	B	A	B	A	B	-	B	A	B	H	B	A	A	B	A	B	A	B	A	B	B	B	A	A	B	B	-	B	B	A	A	A	B	B	H	B	B	B	A
wsnp_Ku_c17659_26797674	3B	79.3507	42029891	B	A	B	A	B	A	H	B	A	B	A	B	H	B	A	B	H	B	A	A	B	A	B	A	B	A	B	B	B	A	A	B	B	H	B	B	A	A	A	B	B	H	B	B	B	A
wsnp_Ku_c33335_42844594	3B	79.3507	60868341	B	A	B	A	B	A	H	B	A	B	A	B	H	B	A	B	H	B	A	A	B	A	B	A	B	A	B	B	B	A	A	B	B	H	B	B	A	A	A	B	B	H	B	B	B	A
RAC875_c5913_172	3B	79.9531	69604725	B	A	B	A	B	A	H	H	A	B	A	B	H	B	A	B	H	B	A	A	B	A	B	A	B	A	A	B	B	A	A	B	B	H	B	B	A	A	A	B	B	H	B	B	B	A
wsnp_Ex_rep_c66896_65307566	3B	79.9531		B	A	B	A	B	A	H	H	A	B	A	B	H	B	A	B	H	B	A	A	B	A	B	A	B	A	A	B	B	A	A	B	B	H	B	B	A	A	A	B	B	H	B	B	B	A
BS00032830_51	3B	80.5629	101313051	B	A	B	A	B	A	H	B	A	B	A	B	H	B	A	B	H	B	A	A	B	A	B	A	B	A	A	B	B	A	A	B	B	H	B	B	A	A	A	B	B	H	B	B	B	A
BS00045195_51	3B	80.5629	160842435	B	A	B	A	B	A	H	B	A	B	A	B	H	B	A	B	H	B	A	A	B	A	B	A	B	A	A	B	B	A	A	B	B	H	B	B	A	A	A	B	B	H	B	B	B	A
Excalibur_c35491_788	3B	80.5629	100227446	B	A	B	A	B	A	H	H	A	B	A	B	H	B	A	B	H	B	A	A	B	A	B	A	B	A	A	B	B	A	A	B	B	H	B	B	A	A	A	B	B	H	B	B	B	A
RAC875_rep_c70966_253	3B	80.5629	64371875	B	A	B	A	B	A	H	H	A	B	A	B	H	B	A	B	H	B	A	A	B	A	B	A	B	A	A	B	B	A	A	B	B	H	B	B	A	A	A	B	B	H	B	B	B	A
wsnp_Ex_c1097_2105209	3B	80.5629		B	A	B	A	B	A	H	B	A	B	A	B	H	B	A	B	H	B	A	A	B	A	B	A	B	A	A	B	B	A	A	B	B	H	B	B	A	A	A	B	B	H	B	B	B	A
BS00066904_51	3B	81.1582		B	A	B	A	B	A	A	B	A	B	A	B	-	B	A	B	-	B	A	A	B	A	B	A	A	A	A	B	B	A	A	B	B	-	B	B	A	A	A	B	B	-	B	B	B	A
BS00097481_51	3B	81.1582	235865408	B	A	B	A	B	A	A	-	A	B	A	B	B	B	A	B	-	B	A	A	B	A	B	A	A	A	A	B	B	A	A	B	B	B	B	B	A	A	A	B	B	A	B	B	B	A
RAC875_c37608_216	3B	81.1582	175093516	B	A	B	A	B	A	-	B	A	B	A	B	-	B	A	B	-	B	A	A	B	A	B	A	A	A	A	B	B	A	A	B	B	H	B	B	A	A	A	B	B	H	B	B	B	A
tplb0062h15_59	3B	81.1582	172321735	B	A	B	A	B	A	H	B	A	B	A	B	H	B	A	B	H	B	A	A	B	A	B	A	A	A	A	B	B	A	A	B	B	A	B	B	A	A	A	B	B	-	B	B	B	A
Excalibur_c14803_1088	3B	82.3078	425155251	B	A	B	A	B	A	A	-	A	B	A	B	B	B	A	B	B	B	A	A	B	A	B	A	A	A	A	B	B	A	A	B	B	B	B	B	A	A	A	B	B	A	B	B	A	A
BobWhite_c634_420	3B	83.5129		B	A	B	A	B	A	A	B	A	B	A	B	H	B	A	B	H	B	A	A	B	A	B	A	A	A	A	B	B	A	A	B	B	H	B	B	A	A	A	B	B	A	B	B	B	A
BS00029548_51	3B	83.5129	207223999	B	A	B	A	B	A	A	B	A	B	A	B	H	B	A	B	H	B	A	A	B	A	B	A	A	A	A	B	B	A	A	B	B	H	B	B	A	A	A	B	B	A	B	B	B	A
BS00049570_51	3B	83.5129	245509557	B	A	B	A	B	A	A	B	A	B	A	B	H	B	A	B	H	B	A	A	B	A	B	A	A	A	A	B	B	A	A	B	B	H	B	B	A	A	A	B	B	A	B	B	B	A
BS00091577_51	3B	83.5129	245949056	B	A	B	A	B	A	A	-	A	B	A	B	H	B	A	B	H	B	A	A	B	A	B	A	A	A	A	B	B	A	A	B	B	H	B	B	A	A	A	B	B	A	B	B	B	A
BS00098496_51	3B	83.5129	222192671	B	A	B	A	B	A	A	-	A	B	A	B	H	B	A	B	H	B	A	A	B	A	B	A	A	A	A	B	B	A	A	B	B	H	B	B	A	A	A	B	B	A	B	B	B	A
BS00106922_51	3B	83.5129	232636240	B	A	B	A	B	A	A	H	A	B	A	B	H	B	A	B	H	B	A	A	B	A	B	A	A	A	A	B	B	A	A	B	B	H	B	B	A	A	A	B	B	A	B	B	B	A
CAP7_c3916_256	3B	83.5129	206193261	B	A	B	A	B	A	A	B	A	B	A	B	H	B	A	B	H	B	A	A	B	A	B	A	A	A	A	B	B	A	A	B	B	H	B	B	A	A	A	B	B	A	B	B	B	A
Excalibur_c14273_1407	3B	83.5129		B	A	B	A	B	A	A	B	A	B	A	B	H	B	A	B	H	B	A	A	B	A	B	A	A	A	A	B	B	A	A	B	B	H	B	B	A	A	A	B	B	A	B	B	B	A
Excalibur_c18641_1849	3B	83.5129		B	A	B	A	B	A	A	B	A	B	A	B	H	B	A	B	H	B	A	A	B	A	B	A	A	A	A	B	B	A	A	B	B	H	B	B	A	A	A	B	B	A	B	B	B	A
Excalibur_c30975_133	3B	83.5129		B	A	B	A	B	A	A	-	A	B	A	B	-	B	A	B	-	B	A	A	B	A	B	A	A	A	A	B	B	A	A	B	B	-	B	B	A	A	A	B	B	A	B	B	B	A
IAAV5505	3B	83.5129	242746787	B	A	B	A	B	A	A	B	A	B	A	B	H	B	A	B	-	B	A	A	B	A	B	A	A	A	A	B	B	A	A	B	B	H	B	B	A	A	A	B	B	A	B	B	B	A
Jagger_c1219_603	3B	83.5129	241391873	B	A	B	A	B	A	A	B	A	B	A	B	H	B	A	B	H	B	A	A	B	A	B	A	A	A	A	B	B	A	A	B	B	H	B	B	A	A	A	B	B	A	B	B	B	A
Kukri_c13537_2069	3B	83.5129		B	A	B	A	B	A	A	B	A	B	A	B	H	B	A	B	H	B	A	A	B	A	B	A	A	A	A	B	B	A	A	B	B	H	B	B	A	A	A	B	B	A	B	B	B	A
Kukri_c45609_882	3B	83.5129	152492427	B	A	B	A	B	A	A	B	A	B	A	B	H	B	A	B	H	B	A	A	B	A	B	A	A	A	A	B	B	A	A	B	B	H	B	B	A	A	A	B	B	A	B	B	B	A
RAC875_c21086_130	3B	83.5129	242166212	B	A	B	A	B	A	A	-	A	B	A	B	-	B	A	B	-	B	A	A	B	A	B	A	A	A	A	B	B	A	A	B	B	-	B	B	A	A	A	B	B	A	B	B	B	A
RAC875_c21955_719	3B	83.5129	221985354	B	A	B	A	B	A	A	B	A	B	A	B	H	B	A	B	H	B	A	A	B	A	B	A	A	A	A	B	B	A	A	B	B	H	B	B	A	A	A	B	B	A	B	B	B	A
RAC875_c8755_314	3B	83.5129	245948751	B	A	B	A	B	A	A	B	A	B	A	B	H	B	A	B	H	B	A	A	B	A	B	A	A	A	A	B	B	A	A	B	B	H	B	B	A	A	A	B	B	A	B	B	B	A
RAC875_rep_c69281_207	3B	83.5129	165737573	B	A	B	A	B	A	A	B	A	B	A	B	H	B	A	B	H	B	A	A	B	A	B	A	A	A	A	B	B	A	A	B	B	H	B	B	A	A	A	B	B	A	B	B	B	A
RAC875_rep_c72470_124	3B	83.5129		B	A	B	A	B	A	A	B	A	B	A	B	H	B	A	B	H	B	A	A	B	A	B	A	A	A	A	B	B	A	A	B	B	H	B	B	A	A	A	B	B	A	B	B	B	A
RAC875_rep_c77173_208	3B	83.5129		B	A	B	A	B	A	A	B	A	B	A	B	H	B	A	B	H	B	A	A	B	A	B	A	A	A	A	B	B	A	A	B	B	H	B	B	A	A	A	B	B	A	B	B	B	A
Tdurum_contig1002_149	3B	83.5129	241398529	B	A	B	A	B	A	A	B	A	B	A	B	H	B	A	B	H	B	A	A	B	A	B	A	A	A	A	B	B	A	A	B	B	H	B	B	A	A	A	B	B	A	B	B	B	A
Tdurum_contig15181_67	3B	83.5129		B	A	B	A	B	A	A	B	A	B	A	B	H	B	A	B	H	B	A	A	B	A	B	A	A	A	A	B	B	A	A	B	B	H	B	B	A	A	A	B	B	A	B	B	B	A
Tdurum_contig26727_187	3B	83.5129	165737573	B	A	B	A	B	A	A	B	A	B	A	B	H	B	A	B	H	B	A	A	B	A	B	A	A	A	A	B	B	A	A	B	B	H	B	B	A	A	A	B	B	A	B	B	B	A
Tdurum_contig26727_267	3B	83.5129	165737653	B	A	B	A	B	A	A	B	A	B	A	B	H	B	A	B	H	B	A	A	B	A	B	A	A	A	A	B	B	A	A	B	B	H	B	B	A	A	A	B	B	A	B	B	B	A
Tdurum_contig28033_420	3B	83.5129	241396573	B	A	B	A	B	A	A	B	A	B	A	B	H	B	A	B	H	B	A	A	B	A	B	A	A	A	A	B	B	A	A	B	B	H	B	B	A	A	A	B	B	A	B	B	B	A
wsnp_BE497469B_Ta_2_1	3B	83.5129	237107073	B	A	B	A	B	A	A	B	A	B	A	B	H	B	A	B	H	B	A	A	B	A	B	A	A	A	A	B	B	A	A	B	B	H	B	B	A	A	A	B	B	A	B	B	B	A
wsnp_Ex_c19982_29009504	3B	83.5129		B	A	B	A	B	A	A	B	A	B	A	B	H	B	A	B	H	B	A	A	B	A	B	A	A	A	A	B	B	A	A	B	B	H	B	B	A	A	A	B	B	A	B	B	B	A
wsnp_Ex_c257_491667	3B	83.5129	232636240	B	A	B	A	B	A	A	B	A	B	A	B	H	B	A	B	H	B	A	A	B	A	B	A	A	A	A	B	B	A	A	B	B	H	B	B	A	A	A	B	B	A	B	B	B	A
wsnp_Ex_rep_c70174_69125822	3B	83.5129	241391873	B	A	B	A	B	A	A	B	A	B	A	B	H	B	A	B	H	B	A	A	B	A	B	A	A	A	A	B	B	A	A	B	B	H	B	B	A	A	A	B	B	A	B	B	B	A
Kukri_c37029_761	3B	84.0877		B	A	B	A	B	A	A	B	A	B	A	B	-	B	A	B	-	B	A	A	B	A	B	A	A	A	A	B	B	A	A	B	B	H	B	B	A	A	A	B	B	A	B	B	B	A
BS00049615_51	3B	84.6559	252343955	B	A	B	A	B	A	A	A	A	B	A	B	H	B	A	B	H	B	A	A	B	A	B	A	A	A	A	B	B	A	A	B	B	H	B	B	A	A	A	B	B	A	B	B	B	A
Excalibur_c54388_193	3B	85.2373		B	A	B	A	B	A	A	A	A	B	A	B	-	B	A	B	H	B	A	A	B	A	B	A	A	A	A	B	B	A	A	B	B	H	B	B	A	A	A	B	B	A	B	B	A	A
BS00049639_51	3B	85.8188		B	A	B	A	B	A	A	H	A	B	A	B	H	B	A	B	H	B	A	A	B	A	B	A	A	A	A	B	B	A	A	B	B	H	B	B	A	A	A	B	B	A	B	B	A	A
BS00072151_51	3B	85.8188	417857895	B	A	B	A	B	A	A	B	A	B	A	B	H	B	A	B	H	B	A	A	B	A	B	A	A	A	A	B	B	A	A	B	B	H	B	B	A	A	A	B	B	A	B	B	A	A
BS00074287_51	3B	85.8188	408354812	B	A	B	A	B	A	A	B	A	B	A	B	H	B	A	B	H	B	A	A	B	A	B	A	A	A	A	B	B	A	A	B	B	H	B	B	A	A	A	B	B	A	B	B	A	A
Excalibur_c63730_660	3B	85.8188	414896400	B	A	B	A	B	A	A	B	A	B	A	B	H	B	A	B	H	B	A	A	B	A	B	A	A	A	A	B	B	A	A	B	B	H	B	B	A	A	A	B	B	A	B	B	A	A
Excalibur_c9001_569	3B	85.8188	322880418	B	A	B	A	B	A	A	B	A	B	A	B	H	B	A	B	-	B	A	A	B	A	B	A	A	A	A	B	B	A	A	B	B	H	B	B	A	A	A	B	B	A	B	B	A	A
IAAV958	3B	85.8188	282466400	B	A	B	A	B	A	A	B	A	B	A	B	H	B	A	B	H	B	A	A	B	A	B	A	A	A	A	B	B	A	A	B	B	H	B	B	A	A	A	B	B	A	B	B	A	A
Kukri_c40909_784	3B	85.8188	423958992	B	A	B	A	B	A	A	B	A	B	A	B	H	B	A	B	H	B	A	A	B	A	B	A	A	A	A	B	B	A	A	B	B	H	B	B	A	A	A	B	B	A	B	B	A	A
Kukri_rep_c70097_286	3B	85.8188	415930394	B	A	B	A	B	A	A	B	A	B	A	B	-	B	A	B	-	B	A	A	B	A	B	A	A	A	A	B	B	A	A	B	B	-	B	B	A	A	A	B	B	A	B	B	A	A
RFL_Contig3799_987	3B	85.8188	378688267	B	A	B	A	B	A	A	B	A	B	A	B	H	B	A	B	H	B	A	A	B	A	B	A	A	A	A	B	B	A	A	B	B	H	B	B	A	A	A	B	B	A	B	B	A	A
TA001646-1356	3B	85.8188		B	A	B	A	B	A	A	B	A	B	A	B	H	B	A	B	H	B	A	A	B	A	B	A	A	A	A	B	B	A	A	B	B	H	B	B	A	A	A	B	B	A	B	B	A	A
Tdurum_contig28384_102	3B	85.8188	416283216	B	A	B	A	B	A	A	B	A	B	A	B	H	B	A	B	H	B	A	A	B	A	B	A	A	A	A	B	B	A	A	B	B	H	B	B	A	A	A	B	B	A	B	B	A	A
wsnp_CAP11_c558_382875	3B	85.8188	399970896	B	A	B	A	B	A	A	B	A	B	A	B	-	B	A	B	-	B	A	A	B	A	B	A	A	A	A	B	B	A	A	B	B	-	B	B	A	A	A	B	B	A	B	B	A	A
wsnp_CAP8_c6899_3227098	3B	85.8188	379343212	B	A	B	A	B	A	A	B	A	B	A	B	H	B	A	B	H	B	A	A	B	A	B	A	A	A	A	B	B	A	A	B	B	H	B	B	A	A	A	B	B	A	B	B	A	A
wsnp_Ex_rep_c67067_65534806	3B	85.8188		B	A	B	A	B	A	A	B	A	B	A	B	H	B	A	B	H	B	A	A	B	A	B	A	A	A	A	B	B	A	A	B	B	H	B	B	A	A	A	B	B	A	B	B	A	A
wsnp_Ex_rep_c69783_68742690	3B	85.8188	379995020	B	A	B	A	B	A	A	B	A	B	A	B	H	B	A	B	H	B	A	A	B	A	B	A	A	A	A	B	B	A	A	B	B	H	B	B	A	A	A	B	B	A	B	B	A	A
wsnp_JD_c119_190135	3B	85.8188	368090974	B	A	B	A	B	A	A	B	A	B	A	B	H	B	A	B	H	B	A	A	B	A	B	A	A	A	A	B	B	A	A	B	B	H	B	B	A	A	A	B	B	A	B	B	A	A
BS00003522_51	3B	86.4071	432844990	B	A	B	A	B	A	A	B	A	B	A	B	H	B	A	B	H	B	A	A	B	A	B	A	A	A	A	B	B	A	A	B	B	H	B	B	A	A	A	B	B	A	B	B	A	A
BobWhite_c17332_325	3B	86.9885	356851602	B	A	B	A	B	A	A	B	A	B	A	A	H	B	A	B	H	B	A	A	B	A	B	A	A	A	A	B	B	A	A	B	B	H	B	B	A	A	A	B	B	A	B	B	A	A
Excalibur_c27055_1326	3B	86.9885	474965650	B	A	B	A	B	A	A	B	A	B	A	A	H	B	A	B	H	B	A	A	B	A	B	A	A	A	A	B	B	A	A	B	B	H	B	B	A	A	A	B	B	A	B	B	A	A
RFL_Contig304_729	3B	86.9885	349636012	B	A	B	A	B	A	A	B	A	B	A	A	H	B	A	B	H	B	A	A	B	A	B	A	A	A	A	B	B	A	A	B	B	H	B	B	A	A	A	B	B	A	B	B	A	A
wsnp_Ex_c34975_43204180	3B	86.9885	457976129	B	A	B	A	B	A	A	B	A	B	A	A	H	B	A	B	H	B	A	A	B	A	B	A	A	A	A	B	B	A	A	B	B	H	B	B	A	A	A	B	B	A	B	B	A	A
BobWhite_c12457_433	3B	87.5699	466264874	B	A	B	A	B	A	A	B	A	B	A	A	H	B	A	B	H	B	A	A	B	A	B	A	A	A	A	B	B	A	A	B	B	H	B	B	A	A	A	B	B	A	B	B	A	B
IAAV4105	3B	88.1514	497089888	B	A	B	A	B	A	A	B	A	B	A	A	H	B	A	B	H	B	A	H	B	A	B	A	A	A	A	B	B	A	A	B	B	H	B	B	A	A	A	B	B	A	B	B	A	B
Kukri_c4074_463	3B	88.1514		B	A	B	A	B	A	A	B	A	B	A	A	H	B	A	B	H	B	A	A	B	A	B	A	A	A	A	B	B	A	A	B	B	H	B	B	A	A	A	B	B	A	B	B	A	B
RAC875_c100413_60	3B	88.1514	487048835	B	A	B	A	B	A	A	B	A	B	A	A	H	B	A	B	H	B	A	A	B	A	B	A	A	A	A	B	B	A	A	B	B	H	B	B	A	A	A	B	B	A	B	B	A	B
RAC875_c17884_616	3B	88.1514		B	A	B	A	B	A	A	B	A	B	A	A	H	B	A	B	H	B	A	A	B	A	B	A	A	A	A	B	B	A	A	B	B	H	B	B	A	A	A	B	B	A	B	B	A	B
RAC875_c3760_770	3B	88.1514	491368894	B	A	B	A	B	A	A	B	A	B	A	A	-	B	A	B	-	B	A	A	B	A	B	A	A	A	A	B	B	A	A	B	B	-	B	B	A	A	A	B	B	A	B	B	A	B
RAC875_c46237_294	3B	88.1514	498057856	B	A	B	A	B	A	A	B	A	B	A	A	H	B	A	B	H	B	A	H	B	A	B	A	A	A	A	B	B	A	A	B	B	H	B	B	A	A	A	B	B	A	B	B	A	B
RAC875_rep_c82061_78	3B	88.1514	492569270	B	A	B	A	B	A	A	B	A	B	A	A	-	B	A	B	H	B	A	H	B	A	B	A	A	A	A	B	B	A	A	B	B	H	B	B	A	A	A	B	B	A	B	B	A	B
Tdurum_contig12941_1413	3B	88.1514	498053917	B	A	B	A	B	A	A	B	A	B	A	A	H	B	A	B	H	B	A	H	B	A	B	A	A	A	A	B	B	A	A	B	B	H	B	B	A	A	A	B	B	A	B	B	A	B
Tdurum_contig20950_359	3B	88.1514	486812872	B	A	B	A	B	A	A	B	A	B	A	A	H	B	A	B	H	B	A	A	B	A	B	A	A	A	A	B	B	A	A	B	B	H	B	B	A	A	A	B	B	A	B	B	A	B
wsnp_BG263758B_Ta_2_1	3B	88.1514	498064254	B	A	B	A	B	A	A	B	A	B	A	A	H	B	A	B	H	B	A	H	B	A	B	A	A	A	A	B	B	A	A	B	B	H	B	B	A	A	A	B	B	A	B	B	A	B
wsnp_Ex_c22016_31191407	3B	88.1514	488878863	B	A	B	A	B	A	A	B	A	B	A	A	H	B	A	B	H	B	A	A	B	A	B	A	A	A	A	B	B	A	A	B	B	H	B	B	A	A	A	B	B	A	B	B	A	B
wsnp_Ex_c5378_9505087	3B	88.1514	488188127	B	A	B	A	B	A	A	B	A	B	A	A	H	B	A	B	H	B	A	A	B	A	B	A	A	A	A	B	B	A	A	B	B	H	B	B	A	A	A	B	B	A	B	B	A	B
[truncated: 2,597 more rows]
[truncated: 48 more columns]
