# Supplementary material for: Identification of quantitative trait loci of agronomic traits in bread wheat using a Pamyati Azieva × Paragon mapping population harvested in three regions of Kazakhstan
Source: PeerJ. 2022 Nov 9;10:e14324. doi: 10.7717/peerj.14324 (PMC9653069; doi:10.7717/peerj.14324)
Supplement: Supplemental Information 3 [file peerj-10-14324-s003.xlsx]

## Sheet: Table S2 Segregation ratio
Table S2. Segregation ratio of 4595 polymorphic SNP markers in mapping population Pamyati Azieva x Paragon
Marker	Chromosome	Missing	AA	AB	BB	P.value
BobWhite_c11946_277	1A	0	46	7	41	1.26E-15
BobWhite_c13761_242	1A	0	43	7	44	1.63E-15
BobWhite_c22134_398	1A	0	41	6	47	2.00E-16
BobWhite_c2506_332	1A	4	44	0	46	2.74E-20
BobWhite_c38865_319	1A	1	42	3	48	1.44E-18
BobWhite_c39996_85	1A	3	42	2	47	6.60E-19
BobWhite_c41272_159	1A	0	41	8	45	7.44E-15
BobWhite_c4646_119	1A	0	45	2	47	1.86E-19
BobWhite_c96_170	1A	0	45	5	44	4.96E-17
BobWhite_rep_c49207_243	1A	0	42	5	47	3.84E-17
BobWhite_rep_c63278_349	1A	0	41	6	47	2.00E-16
BS00002216_51	1A	0	41	6	47	2.00E-16
BS00009808_51	1A	0	42	8	44	8.45E-15
BS00012042_51	1A	1	38	8	47	6.00E-15
BS00016654_51	1A	1	42	4	47	1.03E-17
BS00021714_51	1A	6	40	1	47	3.22E-19
BS00021728_51	1A	1	40	10	43	3.27E-13
BS00021730_51	1A	2	42	4	46	1.86E-17
BS00022201_51	1A	0	44	4	46	7.87E-18
BS00022396_51	1A	1	41	9	43	7.04E-14
BS00022788_51	1A	0	46	7	41	1.26E-15
BS00022824_51	1A	0	48	3	43	9.89E-19
BS00023114_51	1A	0	48	4	42	5.60E-18
BS00032112_51	1A	2	44	1	47	6.90E-20
BS00034278_51	1A	1	42	8	43	1.42E-14
BS00039378_51	1A	1	43	7	43	2.68E-15
BS00056823_51	1A	0	49	6	39	1.01E-16
BS00062876_51	1A	1	43	7	43	2.68E-15
BS00064638_51	1A	5	40	6	43	3.09E-15
BS00065146_51	1A	0	44	4	46	7.87E-18
BS00065170_51	1A	0	50	5	39	1.38E-17
BS00065419_51	1A	0	43	1	50	1.66E-20
BS00067339_51	1A	1	43	2	48	2.45E-19
BS00068358_51	1A	3	44	3	44	5.75E-18
BS00070580_51	1A	0	41	7	46	1.26E-15
BS00078982_51	1A	0	43	2	49	1.32E-19
BS00084022_51	1A	3	44	2	45	8.59E-19
BS00094681_51	1A	0	44	4	46	7.87E-18
BS00102492_51	1A	0	44	4	46	7.87E-18
BS00105601_51	1A	0	43	2	49	1.32E-19
BS00106641_51	1A	1	47	4	42	1.03E-17
CAP7_c1891_230	1A	1	43	7	43	2.68E-15
CAP7_c4833_141	1A	0	42	3	49	7.66E-19
CAP8_c2448_355	1A	1	43	4	46	1.23E-17
CAP8_c806_297	1A	0	44	4	46	7.87E-18
Ex_c12584_2014	1A	0	44	4	46	7.87E-18
Ex_c21450_396	1A	4	44	7	39	8.78E-15
Ex_c25689_1606	1A	0	44	4	46	7.87E-18
Ex_c8514_1342	1A	1	42	5	46	6.92E-17
Excalibur_c10167_1028	1A	1	40	6	47	2.83E-16
Excalibur_c10689_254	1A	0	44	3	47	1.17E-18
Excalibur_c11941_675	1A	0	43	3	48	9.89E-19
Excalibur_c12215_352	1A	0	44	2	48	1.64E-19
Excalibur_c1936_1072	1A	0	42	4	48	5.60E-18
Excalibur_c20133_87	1A	0	44	4	46	7.87E-18
Excalibur_c25891_1402	1A	7	44	0	43	1.27E-19
Excalibur_c26688_138	1A	1	41	7	45	2.25E-15
Excalibur_c37474_179	1A	0	43	5	46	4.56E-17
Excalibur_c37474_242	1A	2	43	3	46	3.17E-18
Excalibur_c44668_382	1A	0	44	8	42	8.45E-15
Excalibur_c45861_189	1A	0	42	8	44	8.45E-15
Excalibur_c49421_443	1A	0	41	6	47	2.00E-16
Excalibur_c5139_198	1A	0	43	4	47	6.93E-18
Excalibur_c57766_92	1A	0	44	4	46	7.87E-18
Excalibur_c59894_97	1A	0	43	4	47	6.93E-18
Excalibur_c66_147	1A	0	42	4	48	5.60E-18
Excalibur_c7026_2635	1A	1	44	2	47	2.90E-19
Excalibur_c71158_54	1A	0	42	6	46	2.47E-16
Excalibur_c82557_201	1A	0	42	5	47	3.84E-17
Excalibur_c9676_163	1A	1	43	3	47	1.79E-18
Excalibur_c97157_65	1A	0	41	10	43	2.15E-13
Excalibur_rep_c88290_94	1A	0	43	5	46	4.56E-17
Excalibur_s107771_77	1A	1	43	4	46	1.23E-17
GENE-0002_856	1A	5	46	0	43	4.27E-20
GENE-0033_233	1A	0	41	8	45	7.44E-15
GENE-0069_468	1A	0	40	10	44	1.89E-13
GENE-0075_140	1A	4	43	1	46	1.87E-19
GENE-0099_329	1A	3	44	4	43	3.60E-17
GENE-0112_64	1A	0	42	6	46	2.47E-16
GENE-0392_97	1A	7	43	0	44	1.27E-19
GENE-0410_71	1A	6	41	0	47	5.17E-20
GENE-0446_243	1A	0	44	4	46	7.87E-18
IAAV1930	1A	0	50	5	39	1.38E-17
IAAV2072	1A	0	41	6	47	2.00E-16
IAAV5406	1A	0	41	6	47	2.00E-16
IAAV5652	1A	0	45	1	48	2.55E-20
IAAV6100	1A	1	51	4	38	2.19E-18
IAAV7172	1A	8	41	0	45	1.76E-19
IAAV7203	1A	1	42	4	47	1.03E-17
IACX11338	1A	0	41	6	47	2.00E-16
IACX18883	1A	0	43	4	47	6.93E-18
IACX293	1A	1	43	4	46	1.23E-17
IACX3496	1A	1	41	5	47	5.58E-17
IACX4378	1A	2	41	4	47	1.50E-17
IACX5960	1A	0	42	9	43	4.49E-14
IACX5982	1A	0	45	2	47	1.86E-19
IACX5994	1A	0	42	10	42	2.24E-13
IACX742	1A	0	41	6	47	2.00E-16
IACX7921	1A	0	44	4	46	7.87E-18
Jagger_c5280_407	1A	0	44	8	42	8.45E-15
Ku_c10813_1122	1A	0	43	8	43	8.82E-15
Ku_c1313_1673	1A	0	43	8	43	8.82E-15
Ku_c23960_333	1A	0	44	4	46	7.87E-18
Ku_c8992_405	1A	5	41	1	47	2.28E-19
Kukri_c10239_2186	1A	1	40	6	47	2.83E-16
Kukri_c12165_1148	1A	3	45	0	46	1.72E-20
Kukri_c12534_559	1A	0	45	2	47	1.86E-19
Kukri_c22508_119	1A	1	45	1	47	4.42E-20
Kukri_c24570_282	1A	0	42	9	43	4.49E-14
Kukri_c25215_124	1A	1	41	5	47	5.58E-17
Kukri_c27717_316	1A	0	43	5	46	4.56E-17
Kukri_c29039_315	1A	10	40	1	43	3.73E-18
Kukri_c29150_143	1A	3	45	0	46	1.72E-20
Kukri_c29655_239	1A	0	42	6	46	2.47E-16
Kukri_c31964_56	1A	0	44	0	50	2.64E-21
Kukri_c3582_87	1A	0	42	6	46	2.47E-16
Kukri_c39377_286	1A	0	41	10	43	2.15E-13
Kukri_c41943_535	1A	2	48	0	44	8.85E-21
Kukri_c45512_193	1A	0	41	8	45	7.44E-15
Kukri_c49463_154	1A	4	41	0	49	1.41E-20
Kukri_c51781_199	1A	0	42	4	48	5.60E-18
Kukri_c52952_315	1A	0	41	6	47	2.00E-16
Kukri_c60564_136	1A	0	41	6	47	2.00E-16
Kukri_c67383_102	1A	6	43	1	44	5.56E-19
Kukri_c7119_392	1A	0	42	9	43	4.49E-14
Kukri_c7436_2259	1A	0	43	3	48	9.89E-19
Kukri_c82555_88	1A	0	46	4	44	7.87E-18
Kukri_c88698_296	1A	0	43	4	47	6.93E-18
Kukri_rep_c101946_496	1A	1	44	0	49	4.88E-21
Kukri_rep_c107771_588	1A	0	44	2	48	1.64E-19
Kukri_rep_c115954_137	1A	0	44	4	46	7.87E-18
Kukri_rep_c117029_125	1A	0	41	10	43	2.15E-13
Ra_c27593_460	1A	2	43	1	48	5.80E-20
Ra_c2895_591	1A	0	43	4	47	6.93E-18
Ra_c29200_300	1A	0	40	4	50	2.84E-18
Ra_c5683_1762	1A	0	42	4	48	5.60E-18
Ra_c58315_265	1A	0	42	5	47	3.84E-17
Ra_c64515_242	1A	0	43	8	43	8.82E-15
Ra_c69908_1877	1A	0	44	4	46	7.87E-18
RAC875_c120509_133	1A	7	41	1	45	7.71E-19
RAC875_c12348_720	1A	0	42	8	44	8.45E-15
RAC875_c12808_182	1A	0	44	4	46	7.87E-18
RAC875_c14926_589	1A	1	44	2	47	2.90E-19
RAC875_c15975_1208	1A	0	41	8	45	7.44E-15
RAC875_c1825_188	1A	2	42	0	50	5.25E-21
RAC875_c21411_162	1A	0	42	9	43	4.49E-14
RAC875_c23081_141	1A	3	38	6	47	5.26E-16
RAC875_c23168_480	1A	0	40	9	45	3.48E-14
RAC875_c25507_551	1A	1	40	7	46	1.82E-15
RAC875_c29540_1109	1A	3	41	7	43	6.81E-15
RAC875_c29540_413	1A	0	41	10	43	2.15E-13
RAC875_c31276_1128	1A	0	41	6	47	2.00E-16
RAC875_c32379_216	1A	1	40	7	46	1.82E-15
RAC875_c34888_65	1A	0	47	4	43	6.93E-18
RAC875_c37545_289	1A	3	41	7	43	6.81E-15
RAC875_c41275_131	1A	0	42	5	47	3.84E-17
RAC875_c53725_217	1A	0	49	6	39	1.01E-16
RAC875_c54380_249	1A	2	45	0	47	1.01E-20
RAC875_c5544_4156	1A	1	44	2	47	2.90E-19
RAC875_c57939_78	1A	0	48	1	45	2.55E-20
RAC875_c62550_470	1A	2	50	3	39	9.38E-19
RAC875_c8245_272	1A	1	43	2	48	2.45E-19
RAC875_c8482_160	1A	2	42	6	44	7.50E-16
RAC875_c86680_391	1A	0	43	4	47	6.93E-18
RAC875_c89908_105	1A	0	45	3	46	1.28E-18
RAC875_rep_c104335_293	1A	1	42	4	47	1.03E-17
RAC875_rep_c104557_1245	1A	2	43	0	49	7.12E-21
RAC875_rep_c105766_652	1A	0	42	8	44	8.45E-15
RAC875_rep_c72805_651	1A	1	42	5	46	6.92E-17
RAC875_rep_c72890_63	1A	0	42	9	43	4.49E-14
RFL_Contig3203_1971	1A	0	41	6	47	2.00E-16
RFL_Contig3232_1224	1A	0	45	1	48	2.55E-20
RFL_Contig530_2305	1A	4	44	0	46	2.74E-20
RFL_Contig5334_831	1A	0	41	8	45	7.44E-15
RFL_Contig5450_993	1A	0	44	4	46	7.87E-18
RFL_Contig854_2201	1A	0	48	1	45	2.55E-20
TA001600-1603	1A	0	42	9	43	4.49E-14
TA001772-0625	1A	0	43	5	46	4.56E-17
TA002402-1350	1A	0	45	7	42	1.49E-15
TA002594-0782	1A	0	44	4	46	7.87E-18
TA003063-0097	1A	0	40	11	43	9.62E-13
TA003382-0407	1A	0	43	5	46	4.56E-17
TA004365-0417	1A	0	44	4	46	7.87E-18
Tdurum_contig13946_241	1A	0	47	3	44	1.17E-18
Tdurum_contig13946_329	1A	0	47	3	44	1.17E-18
Tdurum_contig18174_283	1A	2	42	2	48	3.56E-19
Tdurum_contig29484_628	1A	1	49	4	40	5.65E-18
Tdurum_contig42479_3800	1A	3	46	0	45	1.72E-20
Tdurum_contig46413_680	1A	0	48	1	45	2.55E-20
Tdurum_contig5008_556	1A	0	44	2	48	1.64E-19
Tdurum_contig5008_635	1A	0	44	2	48	1.64E-19
Tdurum_contig50845_82	1A	4	47	4	39	2.94E-17
Tdurum_contig68827_61	1A	1	43	5	45	7.87E-17
Tdurum_contig77289_179	1A	1	47	2	44	2.90E-19
Tdurum_contig81011_244	1A	2	41	4	47	1.50E-17
Tdurum_contig8382_300	1A	0	44	2	48	1.64E-19
Tdurum_contig9199_714	1A	0	44	2	48	1.64E-19
Tdurum_contig96086_74	1A	1	41	8	44	1.30E-14
tplb0043h23_1346	1A	0	48	0	46	3.71E-21
tplb0053o08_2004	1A	0	43	5	46	4.56E-17
wsnp_BE403956A_Ta_2_3	1A	0	43	5	46	4.56E-17
wsnp_BE443588A_Ta_2_2	1A	0	41	8	45	7.44E-15
wsnp_BE490041A_Ta_2_1	1A	0	45	3	46	1.28E-18
wsnp_BF474340A_Ta_2_1	1A	0	42	4	48	5.60E-18
wsnp_BF484606A_Ta_2_3	1A	1	43	3	47	1.79E-18
wsnp_BG606986A_Ta_2_1	1A	0	41	9	44	4.12E-14
wsnp_CAP11_c146_160903	1A	1	42	4	47	1.03E-17
wsnp_CAP12_c1960_972031	1A	0	40	11	43	9.62E-13
wsnp_CAP7_c3472_1623955	1A	0	40	8	46	6.01E-15
wsnp_CAP8_c4785_2322876	1A	0	40	8	46	6.01E-15
wsnp_CAP8_rep_c3938_1936666	1A	0	40	4	50	2.84E-18
wsnp_Ex_c10100_16600633	1A	0	44	4	46	7.87E-18
wsnp_Ex_c10257_16825240	1A	0	43	5	46	4.56E-17
wsnp_Ex_c10595_17291999	1A	3	44	4	43	3.60E-17
wsnp_Ex_c15377_23637176	1A	0	52	4	38	1.02E-18
wsnp_Ex_c18499_27344859	1A	1	48	4	41	7.97E-18
wsnp_Ex_c1997_3755945	1A	0	44	8	42	8.45E-15
wsnp_Ex_c21193_30320134	1A	0	41	6	47	2.00E-16
wsnp_Ex_c21336_30465618	1A	0	40	7	47	9.75E-16
wsnp_Ex_c23598_32826926	1A	4	42	0	48	1.92E-20
wsnp_Ex_c25628_34888439	1A	0	44	1	49	2.15E-20
wsnp_Ex_c25734_34995416	1A	0	42	5	47	3.84E-17
wsnp_Ex_c28900_37982485	1A	0	41	8	45	7.44E-15
wsnp_Ex_c3201_5910642	1A	0	51	6	37	3.64E-17
wsnp_Ex_c33452_41938013	1A	0	42	9	43	4.49E-14
wsnp_Ex_c33452_41938159	1A	0	42	10	42	2.24E-13
wsnp_Ex_c35563_43690084	1A	0	44	4	46	7.87E-18
wsnp_Ex_c41953_48657850	1A	0	42	9	43	4.49E-14
wsnp_Ex_c41953_48658353	1A	0	42	9	43	4.49E-14
wsnp_Ex_c43228_49605281	1A	1	43	7	43	2.68E-15
wsnp_Ex_c4612_8254533	1A	0	40	9	45	3.48E-14
wsnp_Ex_c5060_8985678	1A	0	45	5	44	4.96E-17
wsnp_Ex_c5192_9203682	1A	0	41	6	47	2.00E-16
wsnp_Ex_c5216_9235964	1A	0	41	6	47	2.00E-16
wsnp_Ex_c56097_58351893	1A	3	41	3	47	3.87E-18
wsnp_Ex_c572_1138339	1A	0	43	4	47	6.93E-18
wsnp_Ex_c572_1138503	1A	0	43	4	47	6.93E-18
wsnp_Ex_c572_1138770	1A	0	43	4	47	6.93E-18
wsnp_Ex_c57982_59470152	1A	0	42	6	46	2.47E-16
wsnp_Ex_c6488_11266589	1A	0	42	4	48	5.60E-18
wsnp_Ex_c6817_11761300	1A	0	44	4	46	7.87E-18
wsnp_Ex_c6817_11762714	1A	0	44	4	46	7.87E-18
wsnp_Ex_c9343_15514531	1A	0	50	5	39	1.38E-17
wsnp_Ex_c9343_15514687	1A	0	49	6	39	1.01E-16
wsnp_Ex_rep_c102067_87314043	1A	0	42	8	44	8.45E-15
wsnp_Ex_rep_c108951_91954190	1A	0	41	10	43	2.15E-13
wsnp_Ex_rep_c66628_64934660	1A	0	41	6	47	2.00E-16
wsnp_Ex_rep_c66846_65240088	1A	0	44	5	45	4.96E-17
wsnp_Ex_rep_c68085_66839109	1A	0	43	7	44	1.63E-15
wsnp_Ex_rep_c69738_68695568	1A	0	43	5	46	4.56E-17
wsnp_JD_c3973_5044238	1A	1	41	10	42	3.57E-13
wsnp_JD_c6544_7697578	1A	4	44	4	42	5.72E-17
wsnp_Ku_c10292_17066821	1A	1	43	7	43	2.68E-15
wsnp_Ku_c1642_3232242	1A	1	40	7	46	1.82E-15
wsnp_Ku_c17322_26392311	1A	1	43	7	43	2.68E-15
wsnp_Ku_c37925_46679146	1A	0	44	4	46	7.87E-18
wsnp_Ku_c4018_7333828	1A	0	43	4	47	6.93E-18
wsnp_Ku_c5210_9289260	1A	1	43	7	43	2.68E-15
wsnp_Ku_c557_1166684	1A	0	42	5	47	3.84E-17
wsnp_Ku_c5756_10191339	1A	0	48	4	42	5.60E-18
wsnp_Ku_rep_c109724_94227136	1A	0	42	4	48	5.60E-18
wsnp_Ra_c11594_18777085	1A	0	43	6	45	2.81E-16
wsnp_Ra_c12148_19539667	1A	0	41	6	47	2.00E-16
wsnp_Ra_c20126_29372577	1A	0	44	5	45	4.96E-17
wsnp_Ra_c24776_34331660	1A	0	44	4	46	7.87E-18
wsnp_Ra_c3270_6136601	1A	0	41	10	43	2.15E-13
wsnp_Ra_c37745_45806931	1A	0	41	6	47	2.00E-16
wsnp_Ra_c41581_48764320	1A	0	44	4	46	7.87E-18
wsnp_Ra_c7818_13376644	1A	0	41	6	47	2.00E-16
BobWhite_c14141_197	1B	1	43	10	40	3.27E-13
BobWhite_c26569_190	1B	0	43	2	49	1.32E-19
BobWhite_c2844_569	1B	0	39	6	49	1.01E-16
BobWhite_c28635_785	1B	6	45	3	40	1.93E-17
BobWhite_c42716_71	1B	0	42	9	43	4.49E-14
BobWhite_c4375_347	1B	0	39	7	48	6.94E-16
BobWhite_c4482_73	1B	0	52	7	35	7.59E-17
BobWhite_c48071_144	1B	0	42	8	44	8.45E-15
BS00011205_51	1B	1	49	9	35	8.93E-15
BS00022551_51	1B	0	44	10	40	1.89E-13
BS00022775_51	1B	0	42	8	44	8.45E-15
BS00022902_51	1B	1	49	9	35	8.93E-15
BS00022916_51	1B	6	49	5	34	7.53E-17
BS00022920_51	1B	0	45	10	39	1.53E-13
BS00025736_51	1B	6	50	2	36	4.18E-19
BS00027006_51	1B	0	55	5	34	4.60E-19
BS00032364_51	1B	2	45	10	37	2.90E-13
BS00036189_51	1B	0	51	7	36	1.50E-16
BS00039135_51	1B	0	39	6	49	1.01E-16
BS00041355_51	1B	0	45	10	39	1.53E-13
BS00050522_51	1B	0	33	6	55	1.70E-18
BS00063537_51	1B	2	58	0	34	2.01E-23
BS00064162_51	1B	0	43	7	44	1.63E-15
BS00064349_51	1B	0	42	9	43	4.49E-14
BS00065053_51	1B	1	49	8	36	2.33E-15
BS00065844_51	1B	0	49	9	36	7.52E-15
BS00066278_51	1B	0	41	9	44	4.12E-14
BS00067003_51	1B	0	49	9	36	7.52E-15
BS00067247_51	1B	0	56	0	38	1.23E-22
BS00067436_51	1B	6	42	2	44	3.71E-18
BS00067627_51	1B	0	44	9	41	4.12E-14
BS00073132_51	1B	0	46	11	37	4.47E-13
BS00073530_51	1B	1	46	10	37	1.51E-13
BS00074911_51	1B	0	41	10	43	2.15E-13
BS00084895_51	1B	0	42	6	46	2.47E-16
BS00087784_51	1B	0	49	9	36	7.52E-15
BS00093841_51	1B	1	46	10	37	1.51E-13
BS00094237_51	1B	0	38	7	49	4.53E-16
BS00095568_51	1B	1	45	10	38	2.13E-13
BS00110231_51	1B	4	42	4	44	5.72E-17
CAP11_c2974_53	1B	0	45	11	38	6.28E-13
CAP12_c1085_283	1B	4	49	8	33	3.57E-15
CAP7_c12162_251	1B	1	45	10	38	2.13E-13
CAP8_c5043_190	1B	2	39	7	46	2.56E-15
CAP8_rep_c9642_82	1B	0	49	9	36	7.52E-15
D_contig03023_692	1B	0	52	0	42	1.34E-21
D_contig25392_201	1B	0	49	9	36	7.52E-15
Ex_c25733_348	1B	0	41	7	46	1.26E-15
Excalibur_c17202_1833	1B	0	49	9	36	7.52E-15
Excalibur_c25640_110	1B	0	54	6	34	4.16E-18
Excalibur_c28045_741	1B	0	42	9	43	4.49E-14
Excalibur_c29707_318	1B	1	34	7	52	8.22E-17
Excalibur_c34625_281	1B	0	45	11	38	6.28E-13
Excalibur_c35289_64	1B	3	53	3	35	1.63E-19
Excalibur_c48379_461	1B	0	43	8	43	8.82E-15
Excalibur_c5218_75	1B	6	45	5	38	5.56E-16
Excalibur_c63885_115	1B	2	35	7	50	3.78E-16
Excalibur_c64439_87	1B	0	45	8	41	7.44E-15
Excalibur_c92298_213	1B	0	55	5	34	4.60E-19
Excalibur_c93510_360	1B	3	41	6	44	1.16E-15
Excalibur_rep_c103109_88	1B	1	45	10	38	2.13E-13
Excalibur_rep_c107047_469	1B	1	43	6	44	4.74E-16
Excalibur_rep_c107047_605	1B	0	50	0	44	2.64E-21
Excalibur_rep_c107047_742	1B	1	43	6	44	4.74E-16
Excalibur_rep_c70674_83	1B	3	38	4	49	9.63E-18
Excalibur_rep_c72368_68	1B	5	43	0	46	4.27E-20
GENE-0107_807	1B	0	45	10	39	1.53E-13
GENE-0120_397	1B	0	45	10	39	1.53E-13
GENE-0416_480	1B	0	47	10	37	7.73E-14
GENE-0427_442	1B	0	57	0	37	5.50E-23
GENE-0506_129	1B	1	42	10	41	3.57E-13
IAAV1158	1B	0	46	10	38	1.13E-13
IAAV3567	1B	0	45	11	38	6.28E-13
IAAV5704	1B	9	45	3	37	5.36E-17
IAAV5776	1B	3	50	5	36	2.56E-17
IAAV6731	1B	0	45	11	38	6.28E-13
IAAV7915	1B	7	49	3	35	4.42E-18
IAAV8952	1B	1	49	9	35	8.93E-15
IACX1891	1B	0	42	8	44	8.45E-15
IACX3408	1B	0	45	10	39	1.53E-13
IACX4411	1B	0	38	8	48	3.04E-15
IACX8074	1B	0	48	9	37	1.25E-14
IACX9290	1B	0	48	9	37	1.25E-14
JD_c3116_778	1B	1	45	10	38	2.13E-13
Ku_c11813_215	1B	1	45	10	38	2.13E-13
Ku_c6201_2890	1B	1	46	9	38	3.69E-14
Kukri_c13188_256	1B	0	45	11	38	6.28E-13
Kukri_c18109_331	1B	0	39	6	49	1.01E-16
Kukri_c19247_711	1B	0	42	8	44	8.45E-15
Kukri_c20486_255	1B	0	44	10	40	1.89E-13
Kukri_c22155_1010	1B	1	45	9	39	4.99E-14
Kukri_c25961_166	1B	1	44	10	39	2.76E-13
Kukri_c30461_857	1B	1	42	8	43	1.42E-14
Kukri_c36151_170	1B	0	42	8	44	8.45E-15
Kukri_c4412_383	1B	5	45	6	38	1.97E-15
Kukri_c47342_73	1B	1	49	7	37	5.69E-16
Kukri_c4951_503	1B	0	46	10	38	1.13E-13
Kukri_c51735_79	1B	0	39	6	49	1.01E-16
Kukri_c5861_360	1B	1	49	8	36	2.33E-15
Kukri_c8143_355	1B	0	44	9	41	4.12E-14
Kukri_c92979_195	1B	3	44	0	47	1.57E-20
Kukri_c9752_793	1B	0	44	10	40	1.89E-13
Kukri_rep_c100936_449	1B	2	49	6	37	1.64E-16
Ra_c17685_927	1B	1	39	6	48	2.01E-16
Ra_c37969_549	1B	0	45	10	39	1.53E-13
Ra_c6701_506	1B	0	45	11	38	6.28E-13
Ra_c68984_1882	1B	1	46	10	37	1.51E-13
RAC875_c400_1363	1B	6	34	2	52	9.77E-20
RAC875_c42275_224	1B	0	39	7	48	6.94E-16
RAC875_c46093_492	1B	0	37	8	49	1.91E-15
RAC875_c47427_75	1B	1	42	7	44	2.57E-15
RAC875_c6701_291	1B	1	45	10	38	2.13E-13
RAC875_c78619_523	1B	1	42	8	43	1.42E-14
RAC875_c826_839	1B	0	49	9	36	7.52E-15
RAC875_c8271_1352	1B	0	49	9	36	7.52E-15
RAC875_c8271_1469	1B	0	49	9	36	7.52E-15
RAC875_c95548_156	1B	0	45	10	39	1.53E-13
RAC875_rep_c106876_558	1B	0	44	8	42	8.45E-15
RAC875_rep_c109215_398	1B	9	45	0	40	2.60E-19
RAC875_rep_c119728_146	1B	1	44	10	39	2.76E-13
RAC875_rep_c96733_369	1B	0	49	9	36	7.52E-15
RAC875_rep_c98040_163	1B	0	45	10	39	1.53E-13
RFL_Contig2160_617	1B	0	49	8	37	1.91E-15
RFL_Contig2736_827	1B	0	41	9	44	4.12E-14
RFL_Contig529_963	1B	8	49	0	37	3.96E-20
RFL_Contig5937_1677	1B	1	41	8	44	1.30E-14
RFL_Contig785_535	1B	0	52	7	35	7.59E-17
TA003725-0553	1B	1	44	11	38	1.15E-12
TA003900-0407	1B	0	45	11	38	6.28E-13
TA004081-0677	1B	0	45	10	39	1.53E-13
TA004123-0331	1B	1	49	8	36	2.33E-15
TA004407-0898	1B	1	44	10	39	2.76E-13
TA004668-0687	1B	1	41	6	46	3.66E-16
Tdurum_contig10362_328	1B	0	42	8	44	8.45E-15
Tdurum_contig11896_550	1B	0	44	10	40	1.89E-13
Tdurum_contig13117_1316	1B	0	44	8	42	8.45E-15
Tdurum_contig13879_352	1B	0	52	0	42	1.34E-21
Tdurum_contig13879_919	1B	0	52	9	33	9.75E-16
Tdurum_contig15015_883	1B	0	42	9	43	4.49E-14
Tdurum_contig30517_174	1B	0	44	9	41	4.12E-14
Tdurum_contig42749_3287	1B	1	45	10	38	2.13E-13
Tdurum_contig42797_2922	1B	3	44	8	39	2.87E-14
Tdurum_contig45965_563	1B	3	52	1	38	1.46E-20
Tdurum_contig50473_889	1B	0	45	10	39	1.53E-13
Tdurum_contig60052_184	1B	0	44	11	39	8.11E-13
Tdurum_contig60509_232	1B	2	45	10	37	2.90E-13
Tdurum_contig69792_167	1B	9	45	0	40	2.60E-19
Tdurum_contig75938_1546	1B	0	49	10	35	2.78E-14
Tdurum_contig777_260	1B	0	39	0	55	2.54E-22
Tdurum_contig81102_102	1B	0	45	10	39	1.53E-13
Tdurum_contig92835_177	1B	0	55	5	34	4.60E-19
Tdurum_contig96049_200	1B	0	43	7	44	1.63E-15
tplb0024i15_1754	1B	0	45	9	40	3.48E-14
tplb0034p10_1134	1B	0	41	6	47	2.00E-16
tplb0043a07_880	1B	1	38	6	49	1.30E-16
tplb0043k02_463	1B	5	40	2	47	1.36E-18
wsnp_BE405749B_Ta_2_1	1B	5	44	0	45	4.67E-20
wsnp_BE590634B_Ta_2_1	1B	0	42	9	43	4.49E-14
wsnp_BE590634B_Ta_2_5	1B	0	42	8	44	8.45E-15
wsnp_CAP7_c940_480745	1B	0	45	11	38	6.28E-13
wsnp_Ex_c12063_19310114	1B	1	49	8	36	2.33E-15
wsnp_Ex_c1440_2764867	1B	0	45	10	39	1.53E-13
wsnp_Ex_c1597_3045682	1B	1	55	5	33	4.51E-19
wsnp_Ex_c17452_26163496	1B	0	45	11	38	6.28E-13
wsnp_Ex_c18462_27305612	1B	1	45	10	38	2.13E-13
wsnp_Ex_c2111_3963161	1B	1	49	9	35	8.93E-15
wsnp_Ex_c22006_31180883	1B	0	46	11	37	4.47E-13
wsnp_Ex_c22006_31181239	1B	0	46	11	37	4.47E-13
wsnp_Ex_c25782_35041189	1B	0	49	10	35	2.78E-14
wsnp_Ex_c26419_35667216	1B	0	46	10	38	1.13E-13
wsnp_Ex_c28287_37424983	1B	8	49	1	36	2.14E-19
wsnp_Ex_c3147_5816957	1B	1	41	8	44	1.30E-14
wsnp_Ex_c52474_56060204	1B	1	46	10	37	1.51E-13
wsnp_Ex_c53976_57027635	1B	1	44	10	39	2.76E-13
wsnp_Ex_c6417_11155739	1B	1	49	11	33	1.08E-13
wsnp_Ex_rep_c66255_64400455	1B	0	42	9	43	4.49E-14
wsnp_Ex_rep_c66883_65286958	1B	1	45	0	48	5.80E-21
wsnp_JD_c20621_18304110	1B	1	38	7	48	9.14E-16
wsnp_Ku_c11987_19473636	1B	3	49	8	34	3.19E-15
wsnp_Ku_c13952_22097856	1B	1	55	5	33	4.51E-19
wsnp_Ku_c13952_22097895	1B	3	55	2	34	6.82E-21
wsnp_Ku_c23096_32987510	1B	0	45	10	39	1.53E-13
wsnp_Ku_c24323_34285350	1B	0	45	11	38	6.28E-13
wsnp_Ku_c51703_56915288	1B	0	42	6	46	2.47E-16
wsnp_Ku_c56140_59771244	1B	0	42	9	43	4.49E-14
wsnp_Ra_c19148_28288923	1B	1	45	10	38	2.13E-13
wsnp_Ra_c29782_39115548	1B	0	45	10	39	1.53E-13
wsnp_Ra_c5088_9081927	1B	0	45	11	38	6.28E-13
BobWhite_c10977_834	1D	0	39	7	48	6.94E-16
BobWhite_c1715_887	1D	0	46	6	42	2.47E-16
BobWhite_c28133_87	1D	0	44	6	44	2.93E-16
BobWhite_c33756_74	1D	0	52	6	36	1.92E-17
BobWhite_c5419_643	1D	0	45	6	43	2.81E-16
BobWhite_c5419_861	1D	2	44	5	43	1.33E-16
BobWhite_c555_1485	1D	0	44	6	44	2.93E-16
BobWhite_c6998_365	1D	7	39	0	48	5.06E-20
BobWhite_c816_289	1D	0	45	6	43	2.81E-16
BobWhite_rep_c49356_237	1D	1	46	6	41	3.66E-16
BobWhite_rep_c65565_359	1D	1	42	5	46	6.92E-17
BS00000721_51	1D	1	41	6	46	3.66E-16
BS00011451_51	1D	1	44	5	44	8.22E-17
BS00021702_51	1D	0	38	8	48	3.04E-15
BS00022768_51	1D	0	39	7	48	6.94E-16
BS00024262_51	1D	0	45	6	43	2.81E-16
BS00031658_51	1D	0	44	6	44	2.93E-16
BS00051826_51	1D	0	50	1	43	1.66E-20
BS00058554_51	1D	0	39	7	48	6.94E-16
BS00065478_51	1D	0	44	6	44	2.93E-16
BS00065722_51	1D	2	44	4	44	2.22E-17
BS00066188_51	1D	4	37	1	52	1.70E-20
BS00066446_51	1D	0	39	0	55	2.54E-22
BS00066847_51	1D	1	49	0	44	4.88E-21
BS00067620_51	1D	0	45	6	43	2.81E-16
BS00072193_51	1D	0	43	7	44	1.63E-15
BS00074817_51	1D	0	44	6	44	2.93E-16
BS00075001_51	1D	0	39	7	48	6.94E-16
BS00079095_51	1D	1	39	7	47	1.35E-15
BS00082503_51	1D	0	39	7	48	6.94E-16
BS00086679_51	1D	0	44	6	44	2.93E-16
BS00087783_51	1D	1	40	7	46	1.82E-15
BS00093390_51	1D	0	44	6	44	2.93E-16
CAP11_c3464_68	1D	2	38	6	48	2.64E-16
CAP12_c2978_93	1D	0	44	6	44	2.93E-16
CAP7_c1609_203	1D	0	44	6	44	2.93E-16
CAP8_c2401_433	1D	0	58	4	32	6.19E-21
D_contig06122_208	1D	1	38	7	48	9.14E-16
D_contig16934_681	1D	0	44	6	44	2.93E-16
D_contig74531_32	1D	0	44	6	44	2.93E-16
D_GA8KES401EYUM8_190	1D	0	39	7	48	6.94E-16
D_GBF1XID01DNWRS_378	1D	0	39	7	48	6.94E-16
D_GBUVHFX01ANH44_230	1D	1	44	6	43	4.74E-16
D_GDS7LZN02GSCOW_131	1D	0	41	8	45	7.44E-15
Ex_c13421_2094	1D	0	46	6	42	2.47E-16
Excalibur_c15692_532	1D	7	52	1	34	2.24E-20
Excalibur_c16662_300	1D	4	44	0	46	2.74E-20
Excalibur_c19237_895	1D	0	39	7	48	6.94E-16
Excalibur_c23155_327	1D	1	38	7	48	9.14E-16
Excalibur_c24303_1145	1D	1	56	5	32	1.68E-19
Excalibur_c4030_1770	1D	0	45	6	43	2.81E-16
Excalibur_c4058_1121	1D	0	44	6	44	2.93E-16
Excalibur_c46695_219	1D	0	45	6	43	2.81E-16
Excalibur_c48317_242	1D	0	38	8	48	3.04E-15
Excalibur_c48750_124	1D	3	53	5	33	2.72E-18
Excalibur_c50856_63	1D	0	38	8	48	3.04E-15
Excalibur_c5958_1270	1D	1	44	5	44	8.22E-17
Excalibur_c5958_1398	1D	0	44	6	44	2.93E-16
Excalibur_c8188_243	1D	2	38	7	47	1.81E-15
Excalibur_c8188_693	1D	0	38	8	48	3.04E-15
Excalibur_c8231_398	1D	0	42	7	45	1.49E-15
Excalibur_c8301_1555	1D	0	42	7	45	1.49E-15
GENE-0315_356	1D	0	38	8	48	3.04E-15
GENE-0511_161	1D	2	37	7	48	1.17E-15
GENE-0511_484	1D	0	39	7	48	6.94E-16
IAAV2840	1D	1	38	7	48	9.14E-16
IAAV3490	1D	0	40	8	46	6.01E-15
IAAV4760	1D	0	45	6	43	2.81E-16
IAAV5348	1D	0	45	6	43	2.81E-16
IAAV5841	1D	0	38	8	48	3.04E-15
IAAV614	1D	0	45	6	43	2.81E-16
IAAV724	1D	0	41	7	46	1.26E-15
IAAV7473	1D	0	38	8	48	3.04E-15
IAAV7745	1D	0	39	7	48	6.94E-16
IAAV868	1D	0	46	0	48	3.71E-21
IACX11153	1D	1	45	5	43	7.87E-17
IACX11290	1D	1	43	0	50	3.77E-21
IACX574	1D	4	38	6	46	1.03E-15
IACX589	1D	1	41	6	46	3.66E-16
Ku_c12842_664	1D	4	58	0	32	1.57E-23
Kukri_c20844_116	1D	0	42	8	44	8.45E-15
Kukri_c24648_262	1D	0	45	6	43	2.81E-16
Kukri_c29121_654	1D	0	39	7	48	6.94E-16
Kukri_c33670_261	1D	0	50	3	41	5.45E-19
Kukri_c33670_506	1D	1	50	2	41	1.34E-19
Kukri_c44738_477	1D	0	44	6	44	2.93E-16
Kukri_c49577_630	1D	1	44	6	43	4.74E-16
Kukri_c5113_1082	1D	2	44	5	43	1.33E-16
Kukri_c53398_200	1D	0	45	6	43	2.81E-16
Kukri_c6051_640	1D	0	39	7	48	6.94E-16
Kukri_c6167_1271	1D	0	45	6	43	2.81E-16
Kukri_c837_436	1D	0	46	6	42	2.47E-16
Ra_c21472_1369	1D	0	40	8	46	6.01E-15
Ra_c21676_178	1D	0	39	7	48	6.94E-16
RAC875_c10083_154	1D	0	41	7	46	1.26E-15
RAC875_c16352_594	1D	0	53	5	36	2.32E-18
RAC875_c17951_108	1D	0	44	6	44	2.93E-16
RAC875_c2070_566	1D	0	45	6	43	2.81E-16
RAC875_c35094_476	1D	0	44	6	44	2.93E-16
RAC875_c35846_671	1D	7	39	0	48	5.06E-20
RAC875_c3604_1527	1D	0	39	7	48	6.94E-16
RAC875_c3762_710	1D	0	45	6	43	2.81E-16
RAC875_c4135_1028	1D	0	39	7	48	6.94E-16
RAC875_c43831_91	1D	0	39	7	48	6.94E-16
RAC875_c48997_1160	1D	1	45	6	42	4.35E-16
RAC875_c49612_102	1D	1	39	7	47	1.35E-15
RAC875_c54260_127	1D	0	39	7	48	6.94E-16
RAC875_c82888_83	1D	0	44	6	44	2.93E-16
RAC875_c87321_108	1D	0	38	0	56	1.23E-22
RAC875_c8932_740	1D	0	45	6	43	2.81E-16
RAC875_rep_c105196_532	1D	0	37	6	51	3.64E-17
RAC875_rep_c69508_215	1D	0	45	6	43	2.81E-16
RAC875_rep_c81479_191	1D	0	45	6	43	2.81E-16
RFL_Contig3622_1217	1D	0	39	7	48	6.94E-16
RFL_Contig4705_3207	1D	1	40	7	46	1.82E-15
TA004358-0724	1D	0	39	7	48	6.94E-16
TA004380-0362	1D	1	46	5	42	6.92E-17
TA004476-0719	1D	9	37	0	48	8.40E-20
TA012861-0741	1D	0	37	9	48	1.25E-14
tplb0044p22_2257	1D	1	49	0	44	4.88E-21
tplb0044p22_2330	1D	0	44	6	44	2.93E-16
wsnp_BE586140D_Ta_2_2	1D	0	42	6	46	2.47E-16
wsnp_BE637971D_Ta_2_3	1D	1	46	6	41	3.66E-16
wsnp_CAP11_c1043_618449	1D	1	44	5	44	8.22E-17
wsnp_CAP8_c458_368125	1D	0	45	6	43	2.81E-16
wsnp_CAP8_c458_368155	1D	0	45	6	43	2.81E-16
wsnp_Ex_c1085_2078944	1D	0	46	6	42	2.47E-16
wsnp_Ex_c12447_19847242	1D	8	38	0	48	6.61E-20
wsnp_Ex_c1318_2519998	1D	0	39	7	48	6.94E-16
wsnp_Ex_c1358_2600929	1D	0	46	6	42	2.47E-16
wsnp_Ex_c1358_2602235	1D	0	46	6	42	2.47E-16
wsnp_Ex_c15396_23659859	1D	0	39	7	48	6.94E-16
wsnp_Ex_c18665_27541568	1D	1	38	7	48	9.14E-16
wsnp_Ex_c1969_3705930	1D	0	46	6	42	2.47E-16
wsnp_Ex_c25974_35235456	1D	0	39	7	48	6.94E-16
wsnp_Ex_c27290_36498462	1D	0	39	7	48	6.94E-16
wsnp_Ex_c27290_36498531	1D	0	39	7	48	6.94E-16
wsnp_Ex_c35886_43950102	1D	0	44	6	44	2.93E-16
wsnp_Ex_c3831_6966926	1D	0	39	7	48	6.94E-16
wsnp_Ex_c41048_47969948	1D	2	48	1	43	5.80E-20
wsnp_Ex_c8188_13842273	1D	0	39	7	48	6.94E-16
wsnp_Ex_rep_c101500_86856089	1D	0	41	7	46	1.26E-15
wsnp_Ex_rep_c101500_86856679	1D	0	41	7	46	1.26E-15
wsnp_Ex_rep_c111610_93458148	1D	0	41	7	46	1.26E-15
wsnp_Ex_rep_c66423_64641115	1D	0	38	8	48	3.04E-15
wsnp_Ex_rep_c69024_67924125	1D	0	39	7	48	6.94E-16
wsnp_JD_c8173_9207415	1D	0	39	7	48	6.94E-16
wsnp_Ku_c2624_4986980	1D	0	39	7	48	6.94E-16
wsnp_Ku_c3682_6786230	1D	1	46	1	46	4.62E-20
wsnp_Ku_c40309_48558476	1D	0	40	8	46	6.01E-15
wsnp_Ku_c5560_9851459	1D	0	39	7	48	6.94E-16
wsnp_Ku_c5560_9853214	1D	4	39	3	48	3.84E-18
wsnp_Ku_c7266_12551048	1D	0	45	1	48	2.55E-20
BobWhite_c1049_338	2A	3	57	0	34	5.19E-23
BobWhite_c13373_250	2A	0	54	4	36	2.62E-19
BobWhite_c15773_166	2A	0	48	7	39	6.94E-16
BobWhite_c23953_312	2A	0	54	5	35	1.08E-18
BobWhite_c31163_694	2A	0	51	6	37	3.64E-17
BobWhite_c3833_815	2A	0	56	2	36	2.76E-21
BobWhite_c4517_120	2A	6	40	8	40	1.61E-13
BobWhite_c5178_188	2A	0	47	7	40	9.75E-16
BobWhite_c6356_87	2A	0	54	6	34	4.16E-18
BS00000209_51	2A	0	52	5	37	4.58E-18
BS00003867_51	2A	0	49	2	43	1.32E-19
BS00004724_51	2A	0	45	9	40	3.48E-14
BS00010696_51	2A	0	57	3	34	4.64E-21
BS00022487_51	2A	0	45	9	40	3.48E-14
BS00022666_51	2A	0	55	2	37	6.19E-21
BS00022813_51	2A	0	51	6	37	3.64E-17
BS00022982_51	2A	0	46	9	39	2.70E-14
BS00023202_51	2A	0	47	7	40	9.75E-16
BS00029332_51	2A	0	58	4	32	6.19E-21
BS00031140_51	2A	1	53	5	35	2.52E-18
BS00032606_51	2A	2	54	0	38	6.52E-22
BS00035883_51	2A	0	55	2	37	6.19E-21
BS00036766_51	2A	0	51	6	37	3.64E-17
BS00039422_51	2A	0	55	2	37	6.19E-21
BS00039489_51	2A	0	53	5	36	2.32E-18
BS00041816_51	2A	0	55	8	31	1.92E-17
BS00049644_51	2A	0	55	6	33	1.70E-18
BS00052043_51	2A	0	53	5	36	2.32E-18
BS00056232_51	2A	0	53	5	36	2.32E-18
BS00063368_51	2A	2	49	3	40	1.45E-18
BS00063599_51	2A	4	53	0	37	1.67E-21
BS00067886_51	2A	0	53	5	36	2.32E-18
BS00068050_51	2A	2	57	4	31	1.43E-20
BS00073381_51	2A	0	46	9	39	2.70E-14
BS00073720_51	2A	0	53	5	36	2.32E-18
BS00077768_51	2A	0	51	6	37	3.64E-17
BS00077769_51	2A	0	51	6	37	3.64E-17
BS00078116_51	2A	5	57	0	32	4.21E-23
BS00086329_51	2A	0	58	4	32	6.19E-21
BS00089497_51	2A	0	55	2	37	6.19E-21
BS00091670_51	2A	1	52	5	36	5.24E-18
BS00093201_51	2A	0	55	5	34	4.60E-19
BS00096882_51	2A	0	57	3	34	4.64E-21
BS00096927_51	2A	0	47	6	41	2.00E-16
BS00097263_51	2A	0	53	5	36	2.32E-18
BS00110128_51	2A	1	51	6	36	4.26E-17
CAP11_c2293_200	2A	0	47	6	41	2.00E-16
CAP12_c1437_261	2A	0	53	5	36	2.32E-18
CAP12_c575_105	2A	0	47	6	41	2.00E-16
CAP12_rep_c6956_169	2A	3	54	1	36	3.57E-21
CAP7_c4056_108	2A	4	48	0	42	1.92E-20
CAP7_rep_c6939_197	2A	0	53	5	36	2.32E-18
Ex_c5740_1133	2A	0	51	6	37	3.64E-17
Excalibur_c12177_285	2A	2	49	0	43	7.12E-21
Excalibur_c20439_825	2A	0	48	6	40	1.48E-16
Excalibur_c26918_75	2A	0	45	5	44	4.96E-17
Excalibur_c28017_641	2A	0	55	7	32	5.91E-18
Excalibur_c3171_416	2A	1	58	4	31	5.32E-21
Excalibur_c34913_743	2A	7	56	0	31	9.73E-23
Excalibur_c37649_125	2A	1	51	5	37	9.99E-18
Excalibur_c47219_186	2A	1	57	4	32	1.63E-20
Excalibur_c47535_389	2A	0	55	6	33	1.70E-18
Excalibur_c640_464	2A	4	54	0	36	7.82E-22
Excalibur_c6660_746	2A	0	54	4	36	2.62E-19
Excalibur_c7282_285	2A	0	58	4	32	6.19E-21
Excalibur_c84687_162	2A	0	56	4	34	4.77E-20
Excalibur_c92241_336	2A	0	46	10	38	1.13E-13
Excalibur_rep_c67434_73	2A	2	53	3	36	1.51E-19
GENE-0749_215	2A	0	46	9	39	2.70E-14
GENE-1326_350	2A	0	53	5	36	2.32E-18
GENE-1381_110	2A	1	56	2	35	2.79E-21
GENE-1381_132	2A	0	57	2	35	1.13E-21
GENE-2352_964	2A	0	58	5	31	2.15E-20
IAAV1587	2A	0	53	5	36	2.32E-18
IAAV1691	2A	0	53	5	36	2.32E-18
IAAV1698	2A	0	55	2	37	6.19E-21
IAAV2218	2A	0	56	2	36	2.76E-21
IAAV2718	2A	0	57	3	34	4.64E-21
IAAV3570	2A	0	53	5	36	2.32E-18
IAAV444	2A	0	54	4	36	2.62E-19
IAAV6408	2A	0	58	4	32	6.19E-21
IAAV7468	2A	1	39	9	45	4.99E-14
IAAV880	2A	0	47	6	41	2.00E-16
IACX5800	2A	0	49	6	39	1.01E-16
Jagger_c9554_114	2A	2	57	2	33	1.01E-21
JD_c3358_1128	2A	0	53	5	36	2.32E-18
Ku_c36017_329	2A	0	53	5	36	2.32E-18
Ku_c5710_312	2A	0	54	6	34	4.16E-18
Ku_c69608_894	2A	0	58	4	32	6.19E-21
Ku_c70277_1276	2A	0	53	5	36	2.32E-18
Ku_c8927_2075	2A	0	56	2	36	2.76E-21
Kukri_c11327_977	2A	1	54	4	35	2.78E-19
Kukri_c15489_626	2A	0	54	4	36	2.62E-19
Kukri_c25978_561	2A	0	51	6	37	3.64E-17
Kukri_c29170_680	2A	0	55	2	37	6.19E-21
Kukri_c33374_1048	2A	0	54	4	36	2.62E-19
Kukri_c3882_2021	2A	0	49	2	43	1.32E-19
Kukri_c41543_366	2A	2	53	3	36	1.51E-19
Kukri_c44255_832	2A	0	57	3	34	4.64E-21
Kukri_c45015_145	2A	0	51	6	37	3.64E-17
Kukri_c62142_683	2A	2	56	0	36	1.36E-22
Kukri_c7193_5892	2A	0	56	2	36	2.76E-21
Kukri_c84087_154	2A	1	45	7	41	2.25E-15
Kukri_rep_c70265_167	2A	1	53	5	35	2.52E-18
Ra_c34214_1320	2A	0	56	7	31	2.13E-18
Ra_c42714_1137	2A	0	54	6	34	4.16E-18
Ra_c58279_684	2A	0	43	7	44	1.63E-15
Ra_c58279_702	2A	0	43	7	44	1.63E-15
RAC875_c102123_159	2A	0	53	5	36	2.32E-18
RAC875_c102123_187	2A	0	53	5	36	2.32E-18
RAC875_c11956_477	2A	1	53	3	37	1.35E-19
RAC875_c1706_1888	2A	1	48	6	39	2.01E-16
RAC875_c25848_122	2A	0	48	7	39	6.94E-16
RAC875_c27530_860	2A	1	43	8	42	1.42E-14
RAC875_c33037_578	2A	0	51	6	37	3.64E-17
RAC875_c38750_86	2A	0	53	5	36	2.32E-18
RAC875_c57998_165	2A	4	54	0	36	7.82E-22
RAC875_c76620_361	2A	0	53	5	36	2.32E-18
RAC875_c8093_605	2A	0	55	2	37	6.19E-21
RAC875_rep_c101082_855	2A	1	53	5	35	2.52E-18
RAC875_rep_c101788_71	2A	0	53	5	36	2.32E-18
RAC875_rep_c107961_348	2A	0	49	7	38	4.53E-16
RAC875_rep_c111906_144	2A	0	48	6	40	1.48E-16
RAC875_rep_c119471_174	2A	0	51	6	37	3.64E-17
RAC875_rep_c73777_485	2A	0	54	3	37	5.96E-20
RAC875_rep_c78744_228	2A	0	45	10	39	1.53E-13
RAC875_rep_c88665_100	2A	10	49	0	35	5.58E-20
RAC875_rep_c88665_52	2A	2	50	0	42	5.25E-21
RFL_Contig927_1591	2A	0	51	6	37	3.64E-17
TA002095-0637	2A	1	52	6	35	2.14E-17
TA004602-1630	2A	0	51	7	36	1.50E-16
Tdurum_contig10910_1662	2A	0	53	5	36	2.32E-18
Tdurum_contig11803_306	2A	0	45	10	39	1.53E-13
Tdurum_contig11803_475	2A	5	45	4	40	7.41E-17
Tdurum_contig11803_850	2A	0	45	10	39	1.53E-13
Tdurum_contig13653_471	2A	0	56	6	32	6.39E-19
Tdurum_contig33398_106	2A	0	57	5	32	6.49E-20
Tdurum_contig42153_5854	2A	3	48	3	40	2.84E-18
Tdurum_contig42153_7329	2A	0	49	5	40	2.12E-17
Tdurum_contig47258_1039	2A	0	51	6	37	3.64E-17
Tdurum_contig55610_784	2A	0	42	8	44	8.45E-15
Tdurum_contig56321_232	2A	1	44	7	42	2.57E-15
Tdurum_contig82404_354	2A	0	51	6	37	3.64E-17
Tdurum_contig8350_350	2A	2	44	7	41	3.96E-15
Tdurum_contig84245_154	2A	0	51	6	37	3.64E-17
wsnp_BF201235A_Ta_2_4	2A	1	49	1	43	3.14E-20
wsnp_BG263521A_Ta_2_2	2A	0	54	5	35	1.08E-18
wsnp_CAP8_c2677_1394934	2A	0	55	6	33	1.70E-18
wsnp_Ex_c10751_17505459	2A	0	58	5	31	2.15E-20
wsnp_Ex_c11950_19164191	2A	0	54	4	36	2.62E-19
wsnp_Ex_c12219_19526749	2A	0	51	6	37	3.64E-17
wsnp_Ex_c15740_24096817	2A	0	46	10	38	1.13E-13
wsnp_Ex_c22862_32074455	2A	1	54	4	35	2.78E-19
wsnp_Ex_c2337_4379619	2A	0	56	6	32	6.39E-19
wsnp_Ex_c23720_32957892	2A	0	53	5	36	2.32E-18
wsnp_Ex_c23768_33006588	2A	0	58	4	32	6.19E-21
wsnp_Ex_c25057_34318425	2A	0	54	4	36	2.62E-19
wsnp_Ex_c28204_37349164	2A	0	57	5	32	6.49E-20
wsnp_Ex_c31900_40635609	2A	0	54	4	36	2.62E-19
wsnp_Ex_c42815_49298013	2A	0	53	5	36	2.32E-18
wsnp_Ex_c5412_9564346	2A	0	43	7	44	1.63E-15
wsnp_Ex_c5412_9564478	2A	0	43	7	44	1.63E-15
wsnp_Ex_c5740_10081171	2A	0	51	6	37	3.64E-17
wsnp_Ex_c59095_60108185	2A	0	58	5	31	2.15E-20
wsnp_Ex_rep_c66358_64543089	2A	0	58	4	32	6.19E-21
wsnp_Ex_rep_c66358_64543401	2A	0	58	4	32	6.19E-21
wsnp_Ex_rep_c67264_65795361	2A	0	53	5	36	2.32E-18
wsnp_Ex_rep_c70299_69243401	2A	0	51	6	37	3.64E-17
wsnp_Ex_rep_c70299_69243835	2A	0	51	6	37	3.64E-17
wsnp_Ku_c1292_2572053	2A	0	39	10	45	1.53E-13
wsnp_Ku_c15567_24223777	2A	7	51	0	36	9.66E-21
wsnp_Ku_c15567_24224486	2A	0	51	6	37	3.64E-17
wsnp_Ku_c23598_33524490	2A	6	54	0	34	8.26E-22
wsnp_Ku_c33374_42877546	2A	0	54	4	36	2.62E-19
wsnp_Ku_c38662_47257696	2A	0	53	5	36	2.32E-18
wsnp_Ku_c54793_58953037	2A	0	58	4	32	6.19E-21
wsnp_Ku_c8927_15048149	2A	2	55	0	37	3.11E-22
wsnp_Ra_c10658_17500498	2A	6	54	2	32	1.59E-20
wsnp_Ra_c10861_17763060	2A	0	53	5	36	2.32E-18
wsnp_Ra_c32271_41304469	2A	0	58	5	31	2.15E-20
wsnp_Ra_c66636_64922359	2A	0	51	6	37	3.64E-17
wsnp_RFL_Contig3790_4082085	2A	1	49	0	44	4.88E-21
BobWhite_c10215_242	2B	0	37	3	54	5.96E-20
BobWhite_c10539_201	2B	0	36	3	55	2.77E-20
BobWhite_c11397_231	2B	0	39	6	49	1.01E-16
BobWhite_c12134_1140	2B	1	38	5	50	1.75E-17
BobWhite_c12911_788	2B	0	47	4	43	6.93E-18
BobWhite_c13525_262	2B	2	36	5	51	1.17E-17
BobWhite_c14686_86	2B	0	38	4	52	1.02E-18
BobWhite_c1654_440	2B	0	36	5	53	2.32E-18
BobWhite_c16735_131	2B	0	39	4	51	1.78E-18
BobWhite_c17047_268	2B	2	41	2	49	2.63E-19
BobWhite_c26981_66	2B	0	35	4	55	1.17E-19
BobWhite_c30622_180	2B	0	42	5	47	3.84E-17
BobWhite_c31523_130	2B	0	38	4	52	1.02E-18
BobWhite_c32938_264	2B	1	36	7	50	3.25E-16
BobWhite_c33464_133	2B	0	47	3	44	1.17E-18
BobWhite_c34233_205	2B	0	38	4	52	1.02E-18
BobWhite_c3693_85	2B	1	37	3	53	1.35E-19
BobWhite_c38001_528	2B	0	36	8	50	1.10E-15
BobWhite_c40428_349	2B	0	38	4	52	1.02E-18
BobWhite_c41535_52	2B	0	42	8	44	8.45E-15
BobWhite_c46028_206	2B	0	38	4	52	1.02E-18
BobWhite_c5072_107	2B	2	43	4	45	2.12E-17
BobWhite_c5191_362	2B	0	47	3	44	1.17E-18
BobWhite_c5191_563	2B	0	47	3	44	1.17E-18
BobWhite_c55700_273	2B	0	36	7	51	1.50E-16
BobWhite_c5852_103	2B	0	37	4	53	5.39E-19
BobWhite_c5852_685	2B	0	37	4	53	5.39E-19
BobWhite_c7274_333	2B	0	45	3	46	1.28E-18
BobWhite_c7786_376	2B	0	39	6	49	1.01E-16
BobWhite_c9351_274	2B	0	39	4	51	1.78E-18
BobWhite_c948_52	2B	0	39	6	49	1.01E-16
BobWhite_c9690_94	2B	0	36	7	51	1.50E-16
BobWhite_rep_c61602_139	2B	0	37	4	53	5.39E-19
BobWhite_rep_c63363_160	2B	0	43	5	46	4.56E-17
BobWhite_rep_c64068_241	2B	0	45	3	46	1.28E-18
BobWhite_rep_c65082_84	2B	0	43	5	46	4.56E-17
BobWhite_rep_c65414_125	2B	2	36	5	51	1.17E-17
BS00003606_51	2B	0	36	8	50	1.10E-15
BS00004224_51	2B	0	36	8	50	1.10E-15
BS00009247_51	2B	0	37	7	50	2.72E-16
BS00009882_51	2B	0	47	3	44	1.17E-18
BS00010055_51	2B	1	44	4	45	1.34E-17
BS00011039_51	2B	1	39	6	48	2.01E-16
BS00011047_51	2B	0	47	3	44	1.17E-18
BS00011276_51	2B	5	48	8	33	7.94E-15
BS00011630_51	2B	0	36	8	50	1.10E-15
BS00012036_51	2B	2	36	4	52	1.37E-18
BS00012071_51	2B	3	38	2	51	1.36E-19
BS00016650_51	2B	0	36	8	50	1.10E-15
BS00022422_51	2B	0	44	4	46	7.87E-18
BS00022674_51	2B	0	36	8	50	1.10E-15
BS00022717_51	2B	1	36	8	49	2.33E-15
BS00022800_51	2B	1	35	5	53	2.52E-18
BS00023124_51	2B	0	36	8	50	1.10E-15
BS00025650_51	2B	0	36	8	50	1.10E-15
BS00031253_51	2B	0	36	8	50	1.10E-15
BS00031814_51	2B	0	39	6	49	1.01E-16
BS00035335_51	2B	0	36	5	53	2.32E-18
BS00035380_51	2B	0	36	7	51	1.50E-16
BS00035894_51	2B	1	39	6	48	2.01E-16
BS00037345_51	2B	0	37	4	53	5.39E-19
BS00038217_51	2B	1	42	5	46	6.92E-17
BS00038218_51	2B	1	42	5	46	6.92E-17
BS00039686_51	2B	0	36	8	50	1.10E-15
BS00041323_51	2B	2	40	0	52	2.20E-21
BS00041921_51	2B	0	39	6	49	1.01E-16
BS00041922_51	2B	1	38	5	50	1.75E-17
BS00043099_51	2B	0	42	5	47	3.84E-17
BS00043103_51	2B	0	40	6	48	1.48E-16
BS00046165_51	2B	0	36	8	50	1.10E-15
BS00046601_51	2B	0	47	3	44	1.17E-18
BS00055665_51	2B	0	45	5	44	4.96E-17
BS00058815_51	2B	1	40	5	48	4.13E-17
BS00059896_51	2B	0	36	8	50	1.10E-15
BS00061979_51	2B	1	44	5	44	8.22E-17
BS00063727_51	2B	0	36	7	51	1.50E-16
BS00064448_51	2B	0	36	5	53	2.32E-18
BS00064528_51	2B	0	37	6	51	3.64E-17
BS00065264_51	2B	0	46	10	38	1.13E-13
BS00065327_51	2B	0	36	8	50	1.10E-15
BS00066119_51	2B	3	36	2	53	3.63E-20
BS00067280_51	2B	0	39	5	50	1.38E-17
BS00067337_51	2B	1	42	5	46	6.92E-17
BS00067572_51	2B	3	37	6	48	3.39E-16
BS00068310_51	2B	0	36	0	58	2.25E-23
BS00069685_51	2B	1	38	5	50	1.75E-17
BS00069756_51	2B	1	47	3	43	1.79E-18
BS00070091_51	2B	2	39	6	47	3.91E-16
BS00070861_51	2B	0	38	5	51	8.30E-18
BS00075410_51	2B	0	37	4	53	5.39E-19
BS00077914_51	2B	1	43	6	44	4.74E-16
BS00079013_51	2B	0	37	6	51	3.64E-17
BS00079213_51	2B	3	39	5	47	1.09E-16
BS00080318_51	2B	0	46	3	45	1.28E-18
BS00081109_51	2B	0	36	8	50	1.10E-15
BS00081871_51	2B	3	44	5	42	2.11E-16
BS00084417_51	2B	0	46	3	45	1.28E-18
BS00091068_51	2B	1	36	5	52	5.24E-18
BS00092031_51	2B	1	35	8	50	1.28E-15
BS00092869_51	2B	4	36	4	50	6.77E-18
BS00093992_51	2B	1	36	5	52	5.24E-18
BS00094330_51	2B	0	36	7	51	1.50E-16
BS00100981_51	2B	0	36	7	51	1.50E-16
BS00103461_51	2B	0	42	5	47	3.84E-17
BS00106695_51	2B	0	47	3	44	1.17E-18
BS00107235_51	2B	2	34	8	50	1.44E-15
BS00110490_51	2B	0	44	4	46	7.87E-18
BS00110588_51	2B	1	36	8	49	2.33E-15
CAP11_c1476_128	2B	0	39	4	51	1.78E-18
CAP11_c1820_244	2B	2	48	3	41	2.05E-18
CAP12_c2472_60	2B	0	35	6	53	9.33E-18
CAP12_c2565_239	2B	0	37	4	53	5.39E-19
CAP12_s9114_61	2B	1	47	3	43	1.79E-18
CAP7_c1018_75	2B	0	42	5	47	3.84E-17
CAP7_c16_483	2B	1	46	1	46	4.62E-20
CAP7_c3814_303	2B	1	37	3	53	1.35E-19
CAP7_rep_c5636_102	2B	1	37	5	51	9.99E-18
CAP8_c5161_541	2B	1	36	7	50	3.25E-16
CAP8_rep_c6372_264	2B	1	36	9	48	1.56E-14
CAP8_rep_c8162_101	2B	0	36	9	49	7.52E-15
Ex_c10478_746	2B	0	38	4	52	1.02E-18
Ex_c2510_477	2B	0	36	5	53	2.32E-18
Ex_c525_1401	2B	1	39	6	48	2.01E-16
Ex_c52711_584	2B	0	45	3	46	1.28E-18
Ex_c55735_1012	2B	0	35	4	55	1.17E-19
Ex_c67202_741	2B	1	48	4	41	7.97E-18
Ex_c8832_2521	2B	0	39	6	49	1.01E-16
Excalibur_c100910_239	2B	0	43	5	46	4.56E-17
Excalibur_c10441_984	2B	1	46	2	45	3.17E-19
Excalibur_c11392_1193	2B	0	38	5	51	8.30E-18
Excalibur_c12135_100	2B	0	40	7	47	9.75E-16
Excalibur_c13180_67	2B	0	36	9	49	7.52E-15
Excalibur_c14201_111	2B	0	36	8	50	1.10E-15
Excalibur_c15696_1280	2B	0	37	4	53	5.39E-19
Excalibur_c18165_395	2B	0	36	7	51	1.50E-16
Excalibur_c18275_211	2B	1	37	4	52	1.20E-18
Excalibur_c18417_285	2B	0	37	4	53	5.39E-19
Excalibur_c1883_340	2B	0	47	3	44	1.17E-18
Excalibur_c20050_133	2B	0	47	2	45	1.86E-19
Excalibur_c20647_643	2B	1	37	4	52	1.20E-18
Excalibur_c21220_88	2B	0	42	5	47	3.84E-17
Excalibur_c2157_173	2B	1	36	7	50	3.25E-16
Excalibur_c224_1383	2B	1	46	2	45	3.17E-19
Excalibur_c23723_141	2B	0	38	7	49	4.53E-16
Excalibur_c2484_1329	2B	13	20	7	54	5.86E-19
Excalibur_c2484_2113	2B	0	36	8	50	1.10E-15
Excalibur_c25430_183	2B	0	42	5	47	3.84E-17
Excalibur_c25921_230	2B	0	37	4	53	5.39E-19
Excalibur_c2656_3198	2B	4	40	2	48	7.02E-19
Excalibur_c29417_400	2B	0	40	5	49	2.12E-17
Excalibur_c29417_499	2B	2	40	5	47	7.91E-17
Excalibur_c30167_243	2B	1	43	5	45	7.87E-17
Excalibur_c31864_713	2B	0	47	3	44	1.17E-18
Excalibur_c33079_199	2B	0	37	4	53	5.39E-19
Excalibur_c34937_710	2B	1	41	4	48	7.97E-18
Excalibur_c35074_106	2B	0	36	7	51	1.50E-16
Excalibur_c35074_257	2B	1	36	6	51	4.26E-17
Excalibur_c37753_655	2B	0	36	8	50	1.10E-15
Excalibur_c39493_251	2B	0	41	4	49	4.16E-18
Excalibur_c40976_111	2B	1	36	8	49	2.33E-15
Excalibur_c40976_87	2B	1	36	8	49	2.33E-15
Excalibur_c41459_96	2B	1	45	3	45	2.12E-18
Excalibur_c42248_663	2B	0	40	6	48	1.48E-16
Excalibur_c43482_141	2B	4	43	0	47	2.40E-20
Excalibur_c46143_143	2B	0	39	6	49	1.01E-16
Excalibur_c4748_360	2B	0	45	5	44	4.96E-17
Excalibur_c53516_119	2B	0	42	5	47	3.84E-17
Excalibur_c56550_71	2B	0	45	4	45	8.22E-18
Excalibur_c57590_187	2B	2	36	6	50	9.31E-17
Excalibur_c584_726	2B	0	37	4	53	5.39E-19
Excalibur_c58566_284	2B	1	37	4	52	1.20E-18
Excalibur_c65341_303	2B	8	36	0	50	2.17E-20
Excalibur_c65466_714	2B	0	47	3	44	1.17E-18
Excalibur_c6735_214	2B	3	36	5	50	2.56E-17
Excalibur_c7051_1027	2B	0	47	3	44	1.17E-18
Excalibur_c7136_1260	2B	0	44	5	45	4.96E-17
Excalibur_c71500_231	2B	0	37	5	52	4.58E-18
Excalibur_c73922_109	2B	5	37	0	52	3.77E-21
Excalibur_c73922_55	2B	0	37	5	52	4.58E-18
Excalibur_c7963_1722	2B	2	41	4	47	1.50E-17
Excalibur_c80601_278	2B	0	36	8	50	1.10E-15
Excalibur_c80601_308	2B	2	36	3	53	1.51E-19
Excalibur_c841_609	2B	0	49	1	44	2.15E-20
Excalibur_c8720_297	2B	6	36	1	51	4.36E-20
Excalibur_c8919_345	2B	0	46	0	48	3.71E-21
Excalibur_c94383_157	2B	0	46	6	42	2.47E-16
Excalibur_c95944_641	2B	4	36	4	50	6.77E-18
Excalibur_rep_c101581_184	2B	0	36	8	50	1.10E-15
Excalibur_rep_c105614_172	2B	1	45	9	39	4.99E-14
Excalibur_rep_c106537_63	2B	0	37	4	53	5.39E-19
Excalibur_rep_c107546_206	2B	0	37	4	53	5.39E-19
Excalibur_rep_c107558_367	2B	0	40	5	49	2.12E-17
Excalibur_rep_c107769_116	2B	0	44	0	50	2.64E-21
Excalibur_rep_c108225_302	2B	2	37	4	51	2.63E-18
Excalibur_rep_c110697_196	2B	0	36	8	50	1.10E-15
Excalibur_rep_c111672_114	2B	0	37	4	53	5.39E-19
Excalibur_rep_c66577_159	2B	0	36	5	53	2.32E-18
Excalibur_rep_c67360_303	2B	0	38	6	50	6.33E-17
Excalibur_rep_c68899_1400	2B	2	44	2	46	5.05E-19
Excalibur_rep_c68985_110	2B	7	36	0	51	9.66E-21
Excalibur_rep_c77221_93	2B	2	42	1	49	4.47E-20
GENE-0581_156	2B	0	45	4	45	8.22E-18
GENE-0609_166	2B	3	38	2	51	1.36E-19
GENE-0675_104	2B	1	37	7	49	5.69E-16
GENE-0872_343	2B	0	35	5	54	1.08E-18
GENE-0910_153	2B	1	37	5	51	9.99E-18
GENE-0918_159	2B	0	48	4	42	5.60E-18
GENE-0968_155	2B	0	37	4	53	5.39E-19
GENE-1018_99	2B	0	45	5	44	4.96E-17
GENE-1056_55	2B	0	45	3	46	1.28E-18
GENE-1125_32	2B	0	38	5	51	8.30E-18
GENE-1232_258	2B	0	36	7	51	1.50E-16
GENE-1355_130	2B	3	46	0	45	1.72E-20
GENE-1375_20	2B	2	36	5	51	1.17E-17
GENE-1442_78	2B	1	39	6	48	2.01E-16
GENE-1444_162	2B	1	38	5	50	1.75E-17
GENE-1741_103	2B	3	44	1	46	1.20E-19
IAAV1401	2B	0	36	8	50	1.10E-15
IAAV1502	2B	0	47	3	44	1.17E-18
IAAV283	2B	5	38	0	51	7.07E-21
IAAV3303	2B	1	36	4	53	6.03E-19
IAAV3984	2B	1	36	7	50	3.25E-16
IAAV4434	2B	5	39	1	49	1.11E-19
IAAV5331	2B	0	40	6	48	1.48E-16
IAAV5350	2B	1	36	5	52	5.24E-18
IAAV539	2B	0	39	6	49	1.01E-16
IAAV5675	2B	0	37	5	52	4.58E-18
IAAV6156	2B	0	39	6	49	1.01E-16
IAAV7129	2B	0	39	6	49	1.01E-16
IAAV717	2B	0	36	5	53	2.32E-18
IAAV7841	2B	2	38	4	50	4.63E-18
IAAV8040	2B	0	44	5	45	4.96E-17
IAAV8980	2B	0	37	4	53	5.39E-19
IAAV9183	2B	0	38	5	51	8.30E-18
IACX1098	2B	3	40	7	44	5.97E-15
IACX5726	2B	0	50	0	44	2.64E-21
IACX5850	2B	0	35	5	54	1.08E-18
IACX6223	2B	0	42	5	47	3.84E-17
IACX6239	2B	4	45	0	45	2.86E-20
IACX6309	2B	0	36	8	50	1.10E-15
IACX6340	2B	0	40	6	48	1.48E-16
IACX7505	2B	0	39	4	51	1.78E-18
IACX7717	2B	0	45	5	44	4.96E-17
IACX8446	2B	2	48	1	43	5.80E-20
IACX8828	2B	0	47	3	44	1.17E-18
Jagger_c6543_220	2B	0	36	8	50	1.10E-15
Jagger_c6853_60	2B	0	39	4	51	1.78E-18
Jagger_c7688_98	2B	0	46	3	45	1.28E-18
Ku_c14053_772	2B	0	37	4	53	5.39E-19
Ku_c3479_1035	2B	2	36	7	49	6.95E-16
Ku_c41677_924	2B	0	42	5	47	3.84E-17
Ku_c6050_678	2B	0	39	4	51	1.78E-18
Kukri_c101063_740	2B	1	36	8	49	2.33E-15
Kukri_c10869_1591	2B	4	45	0	45	2.86E-20
Kukri_c1175_1577	2B	0	50	0	44	2.64E-21
Kukri_c1460_1032	2B	0	36	6	52	1.92E-17
Kukri_c16758_443	2B	1	49	1	43	3.14E-20
Kukri_c17062_618	2B	1	38	3	52	2.58E-19
Kukri_c18754_67	2B	2	45	3	44	3.46E-18
Kukri_c19198_379	2B	0	36	8	50	1.10E-15
Kukri_c19751_873	2B	0	36	5	53	2.32E-18
Kukri_c26288_419	2B	0	40	9	45	3.48E-14
Kukri_c26474_540	2B	0	37	4	53	5.39E-19
Kukri_c26645_254	2B	1	37	4	52	1.20E-18
Kukri_c27532_148	2B	1	37	3	53	1.35E-19
Kukri_c27631_1329	2B	0	47	3	44	1.17E-18
Kukri_c28478_750	2B	1	47	1	45	4.42E-20
Kukri_c29640_92	2B	3	41	3	47	3.87E-18
Kukri_c3024_1268	2B	1	41	1	51	1.58E-20
Kukri_c30659_91	2B	7	36	0	51	9.66E-21
Kukri_c30847_551	2B	0	45	6	43	2.81E-16
Kukri_c31059_130	2B	0	36	8	50	1.10E-15
Kukri_c32700_104	2B	0	35	5	54	1.08E-18
Kukri_c32980_552	2B	1	6	34	53	1.68E-12
Kukri_c32980_680	2B	6	7	28	53	1.07E-13
Kukri_c34353_821	2B	1	38	6	49	1.30E-16
Kukri_c34553_89	2B	0	47	3	44	1.17E-18
Kukri_c3501_1175	2B	1	46	5	42	6.92E-17
Kukri_c36879_83	2B	0	42	5	47	3.84E-17
Kukri_c3701_392	2B	0	39	6	49	1.01E-16
Kukri_c38497_174	2B	0	36	7	51	1.50E-16
Kukri_c40621_513	2B	1	37	5	51	9.99E-18
Kukri_c42244_809	2B	0	39	6	49	1.01E-16
Kukri_c4294_371	2B	0	37	5	52	4.58E-18
Kukri_c4710_991	2B	0	44	4	46	7.87E-18
Kukri_c48787_108	2B	2	37	4	51	2.63E-18
Kukri_c49010_266	2B	0	37	7	50	2.72E-16
Kukri_c49219_76	2B	0	36	5	53	2.32E-18
Kukri_c52356_96	2B	0	36	6	52	1.92E-17
Kukri_c53629_239	2B	3	39	3	49	1.92E-18
Kukri_c5497_312	2B	0	43	7	44	1.63E-15
Kukri_c55909_1109	2B	3	44	3	44	5.75E-18
Kukri_c55996_63	2B	0	46	3	45	1.28E-18
Kukri_c57014_168	2B	2	36	5	51	1.17E-17
Kukri_c5711_112	2B	0	37	4	53	5.39E-19
Kukri_c57811_86	2B	0	38	4	52	1.02E-18
Kukri_c5904_80	2B	0	41	6	47	2.00E-16
Kukri_c6306_1151	2B	2	39	5	48	5.58E-17
Kukri_c6973_344	2B	0	39	6	49	1.01E-16
Kukri_c75902_132	2B	0	38	5	51	8.30E-18
Kukri_c7953_513	2B	0	36	8	50	1.10E-15
Kukri_c79815_483	2B	4	36	1	53	8.34E-21
Kukri_c84629_315	2B	0	36	8	50	1.10E-15
Kukri_c900_1334	2B	0	45	10	39	1.53E-13
Kukri_c9507_95	2B	2	36	0	56	1.36E-22
Kukri_c97631_275	2B	1	37	5	51	9.99E-18
Kukri_c9785_62	2B	1	37	4	52	1.20E-18
Kukri_rep_c101529_1199	2B	0	37	7	50	2.72E-16
Kukri_rep_c103893_875	2B	0	43	5	46	4.56E-17
Kukri_rep_c106290_204	2B	0	41	6	47	2.00E-16
Kukri_rep_c68903_301	2B	0	36	8	50	1.10E-15
Kukri_rep_c68903_708	2B	1	36	9	48	1.56E-14
Kukri_rep_c70962_1545	2B	0	36	5	53	2.32E-18
Kukri_rep_c94009_116	2B	0	40	6	48	1.48E-16
Kukri_rep_c97239_133	2B	3	39	5	47	1.09E-16
Ra_c111671_555	2B	0	38	5	51	8.30E-18
Ra_c11464_294	2B	0	43	5	46	4.56E-17
Ra_c15365_530	2B	1	39	4	50	3.67E-18
Ra_c27641_452	2B	7	36	1	50	9.74E-20
Ra_c4051_1010	2B	0	38	5	51	8.30E-18
Ra_c4397_542	2B	0	39	0	55	2.54E-22
Ra_c491_902	2B	7	43	1	43	9.26E-19
Ra_c68109_376	2B	0	37	5	52	4.58E-18
Ra_c71978_532	2B	0	37	5	52	4.58E-18
Ra_c9190_1384	2B	0	39	4	51	1.78E-18
RAC875_c10132_462	2B	0	36	9	49	7.52E-15
RAC875_c110838_165	2B	1	43	0	50	3.77E-21
RAC875_c11609_62	2B	1	42	5	46	6.92E-17
RAC875_c1226_652	2B	3	39	0	52	2.71E-21
RAC875_c14775_1048	2B	0	34	6	54	4.16E-18
RAC875_c14885_1184	2B	4	36	0	54	7.82E-22
RAC875_c17455_152	2B	4	36	5	49	5.53E-17
RAC875_c17459_566	2B	0	36	8	50	1.10E-15
RAC875_c17720_436	2B	4	42	1	47	1.57E-19
RAC875_c18463_156	2B	3	37	0	54	7.25E-22
RAC875_c1858_2693	2B	0	47	3	44	1.17E-18
RAC875_c19042_2102	2B	0	45	10	39	1.53E-13
RAC875_c19210_348	2B	1	39	5	49	2.80E-17
RAC875_c19685_944	2B	3	46	0	45	1.72E-20
RAC875_c21868_792	2B	0	42	5	47	3.84E-17
RAC875_c22463_494	2B	0	47	3	44	1.17E-18
RAC875_c2300_1021	2B	1	45	5	43	7.87E-17
RAC875_c26415_350	2B	1	42	5	46	6.92E-17
RAC875_c29716_871	2B	0	39	4	51	1.78E-18
RAC875_c29913_139	2B	4	39	1	50	5.39E-20
RAC875_c30936_411	2B	0	37	4	53	5.39E-19
RAC875_c31214_58	2B	0	48	4	42	5.60E-18
RAC875_c31328_381	2B	0	47	3	44	1.17E-18
RAC875_c31358_214	2B	0	44	6	44	2.93E-16
RAC875_c32447_187	2B	3	36	0	55	3.29E-22
RAC875_c32503_134	2B	0	38	7	49	4.53E-16
RAC875_c3302_1411	2B	0	42	5	47	3.84E-17
RAC875_c3397_1492	2B	0	36	8	50	1.10E-15
RAC875_c34512_493	2B	0	40	5	49	2.12E-17
RAC875_c34512_685	2B	0	40	5	49	2.12E-17
RAC875_c36614_344	2B	1	40	0	53	1.04E-21
RAC875_c3752_890	2B	1	37	4	52	1.20E-18
RAC875_c37540_583	2B	0	47	3	44	1.17E-18
RAC875_c37837_889	2B	1	42	4	47	1.03E-17
RAC875_c3947_441	2B	1	38	5	50	1.75E-17
RAC875_c41224_72	2B	0	38	4	52	1.02E-18
RAC875_c41476_217	2B	1	47	0	46	6.32E-21
RAC875_c4203_382	2B	0	37	4	53	5.39E-19
RAC875_c46516_443	2B	0	48	0	46	3.71E-21
RAC875_c47353_350	2B	1	39	6	48	2.01E-16
RAC875_c50245_120	2B	0	39	6	49	1.01E-16
RAC875_c5577_1682	2B	1	42	0	51	2.67E-21
RAC875_c5673_1209	2B	1	46	3	44	2.03E-18
RAC875_c57353_245	2B	3	46	0	45	1.72E-20
RAC875_c57938_94	2B	1	37	3	53	1.35E-19
RAC875_c60230_122	2B	1	37	4	52	1.20E-18
RAC875_c63545_85	2B	0	37	4	53	5.39E-19
RAC875_c67311_429	2B	1	39	3	51	4.51E-19
RAC875_c76533_442	2B	0	42	5	47	3.84E-17
RAC875_c7827_218	2B	1	38	6	49	1.30E-16
RAC875_c8045_231	2B	0	39	4	51	1.78E-18
RAC875_c8197_810	2B	0	36	9	49	7.52E-15
RAC875_c86069_65	2B	0	44	2	48	1.64E-19
RAC875_c9122_395	2B	2	37	2	53	3.26E-20
RAC875_c98387_130	2B	1	48	2	43	2.45E-19
RAC875_rep_c106542_272	2B	0	36	8	50	1.10E-15
RAC875_rep_c109975_192	2B	0	37	4	53	5.39E-19
RAC875_rep_c115433_378	2B	4	43	1	46	1.87E-19
RAC875_rep_c71112_400	2B	0	45	0	49	3.27E-21
RAC875_rep_c72879_435	2B	0	37	5	52	4.58E-18
RAC875_rep_c91134_949	2B	5	38	1	50	6.76E-20
RAC875_s109189_188	2B	0	36	5	53	2.32E-18
RFL_Contig1483_1765	2B	0	39	6	49	1.01E-16
RFL_Contig189_894	2B	1	39	6	48	2.01E-16
RFL_Contig2231_346	2B	0	42	5	47	3.84E-17
RFL_Contig2751_1562	2B	1	44	3	46	2.03E-18
RFL_Contig3172_1752	2B	0	36	8	50	1.10E-15
RFL_Contig337_1645	2B	0	38	5	51	8.30E-18
RFL_Contig3713_316	2B	0	47	3	44	1.17E-18
RFL_Contig385_761	2B	1	48	0	45	5.80E-21
RFL_Contig4499_1145	2B	0	36	7	51	1.50E-16
RFL_Contig4499_204	2B	4	35	4	51	3.48E-18
RFL_Contig4849_702	2B	0	38	4	52	1.02E-18
RFL_Contig4856_71	2B	1	36	5	52	5.24E-18
RFL_Contig5290_1493	2B	0	39	4	51	1.78E-18
TA001322-1176	2B	0	40	6	48	1.48E-16
TA001505-1171	2B	0	37	4	53	5.39E-19
TA001720-0874	2B	1	37	5	51	9.99E-18
TA002013-0438	2B	0	38	4	52	1.02E-18
TA002269-1202	2B	0	37	5	52	4.58E-18
TA002338-0901	2B	0	36	8	50	1.10E-15
TA002671-0128-w	2B	0	38	5	51	8.30E-18
TA002989-0535	2B	2	50	0	42	5.25E-21
TA004199-0831	2B	0	37	4	53	5.39E-19
TA004710-0394	2B	0	47	3	44	1.17E-18
TA005292-0114	2B	1	43	6	44	4.74E-16
TA005635-0459	2B	0	39	6	49	1.01E-16
TA007378-0375	2B	1	40	4	49	5.65E-18
TA011763-0791	2B	0	37	7	50	2.72E-16
TA013902-0228	2B	0	36	8	50	1.10E-15
Tdurum_contig10048_447	2B	0	45	3	46	1.28E-18
Tdurum_contig10048_61	2B	0	45	3	46	1.28E-18
Tdurum_contig10108_246	2B	0	38	5	51	8.30E-18
Tdurum_contig10208_447	2B	0	39	6	49	1.01E-16
Tdurum_contig12159_468	2B	0	48	0	46	3.71E-21
Tdurum_contig12459_491	2B	0	37	5	52	4.58E-18
Tdurum_contig12831_69	2B	0	37	5	52	4.58E-18
Tdurum_contig12836_418	2B	0	39	4	51	1.78E-18
Tdurum_contig1653_190	2B	0	42	5	47	3.84E-17
Tdurum_contig28980_211	2B	0	36	7	51	1.50E-16
Tdurum_contig30930_184	2B	0	41	1	52	7.74E-21
Tdurum_contig32221_462	2B	0	36	8	50	1.10E-15
Tdurum_contig42112_2432	2B	2	38	5	49	3.62E-17
Tdurum_contig45468_674	2B	8	37	0	49	3.96E-20
Tdurum_contig46389_1459	2B	0	38	0	56	1.23E-22
Tdurum_contig46389_1540	2B	0	38	0	56	1.23E-22
Tdurum_contig49928_424	2B	0	27	4	63	8.45E-24
Tdurum_contig52627_496	2B	0	45	3	46	1.28E-18
Tdurum_contig54784_485	2B	0	36	8	50	1.10E-15
Tdurum_contig54925_202	2B	0	38	5	51	8.30E-18
Tdurum_contig54925_225	2B	1	38	4	51	2.19E-18
Tdurum_contig54925_415	2B	1	38	5	50	1.75E-17
Tdurum_contig55699_246	2B	1	36	8	49	2.33E-15
Tdurum_contig56876_365	2B	3	36	6	49	2.00E-16
Tdurum_contig59780_988	2B	1	41	5	47	5.58E-17
Tdurum_contig62852_302	2B	1	42	5	46	6.92E-17
Tdurum_contig62852_538	2B	5	42	0	47	3.56E-20
Tdurum_contig68666_570	2B	1	37	6	50	7.79E-17
Tdurum_contig68806_677	2B	6	41	0	47	5.17E-20
Tdurum_contig71365_233	2B	0	36	7	51	1.50E-16
Tdurum_contig71387_65	2B	7	39	0	48	5.06E-20
Tdurum_contig7144_602	2B	0	38	5	51	8.30E-18
Tdurum_contig82393_581	2B	0	36	8	50	1.10E-15
Tdurum_contig82770_296	2B	4	38	0	52	3.24E-21
Tdurum_contig91519_224	2B	1	40	0	53	1.04E-21
TG0051	2B	8	40	6	40	1.49E-14
tplb0024l03_910	2B	0	36	8	50	1.10E-15
tplb0031k24_254	2B	0	39	6	49	1.01E-16
tplb0034a02_1566	2B	0	37	4	53	5.39E-19
tplb0034e07_1869	2B	0	41	5	48	2.98E-17
tplb0034e07_718	2B	0	41	7	46	1.26E-15
tplb0040e02_1293	2B	1	37	3	53	1.35E-19
tplb0045o20_1168	2B	0	42	5	47	3.84E-17
tplb0045o20_699	2B	0	42	5	47	3.84E-17
tplb0054d13_2445	2B	0	41	5	48	2.98E-17
wsnp_BE490267A_Ta_2_1	2B	0	36	5	53	2.32E-18
wsnp_BE490763B_Ta_2_1	2B	4	35	0	55	3.36E-22
wsnp_BE490763B_Ta_2_2	2B	1	34	3	56	1.17E-20
wsnp_BF473744B_Ta_2_2	2B	0	37	5	52	4.58E-18
wsnp_BG608232B_Ta_2_2	2B	0	38	5	51	8.30E-18
wsnp_CAP11_c307_255609	2B	0	37	4	53	5.39E-19
wsnp_CAP11_c3226_1588070	2B	0	45	4	45	8.22E-18
wsnp_CAP11_rep_c9018_3888047	2B	0	39	6	49	1.01E-16
wsnp_CAP7_c1592_791887	2B	1	36	8	49	2.33E-15
wsnp_CAP7_c317_172502	2B	0	36	8	50	1.10E-15
wsnp_CAP8_c1240_753371	2B	0	39	4	51	1.78E-18
wsnp_Ex_c10961_17803258	2B	1	39	6	48	2.01E-16
wsnp_Ex_c114_230248	2B	0	36	5	53	2.32E-18
wsnp_Ex_c13351_21042379	2B	1	39	6	48	2.01E-16
wsnp_Ex_c15985_24399118	2B	0	38	4	52	1.02E-18
wsnp_Ex_c163_321026	2B	0	42	5	47	3.84E-17
wsnp_Ex_c1758_3326792	2B	0	36	5	53	2.32E-18
wsnp_Ex_c17845_26604587	2B	0	37	5	52	4.58E-18
wsnp_Ex_c1962_3696265	2B	0	43	5	46	4.56E-17
wsnp_Ex_c1996_3754394	2B	3	43	4	44	3.60E-17
wsnp_Ex_c20529_29608872	2B	3	32	5	54	1.08E-18
wsnp_Ex_c21092_30220342	2B	0	43	7	44	1.63E-15
wsnp_Ex_c22018_31193171	2B	0	39	6	49	1.01E-16
wsnp_Ex_c24711_33964543	2B	0	38	5	51	8.30E-18
wsnp_Ex_c25043_34305764	2B	1	45	9	39	4.99E-14
wsnp_Ex_c25217_34481787	2B	0	39	4	51	1.78E-18
wsnp_Ex_c298_580660	2B	0	48	4	42	5.60E-18
wsnp_Ex_c3044_5620102	2B	0	38	7	49	4.53E-16
wsnp_Ex_c326_636368	2B	3	43	2	46	7.86E-19
wsnp_Ex_c34303_42642389	2B	2	46	0	46	1.05E-20
wsnp_Ex_c3764_6853627	2B	0	40	0	54	4.82E-22
wsnp_Ex_c4024_7278036	2B	1	36	7	50	3.25E-16
wsnp_Ex_c40976_47910672	2B	0	36	8	50	1.10E-15
wsnp_Ex_c41558_48356814	2B	1	38	4	51	2.19E-18
wsnp_Ex_c41558_48356869	2B	0	39	4	51	1.78E-18
wsnp_Ex_c45468_51254978	2B	0	36	8	50	1.10E-15
wsnp_Ex_c46576_52042185	2B	0	36	5	53	2.32E-18
wsnp_Ex_c5123_9087869	2B	1	36	8	49	2.33E-15
wsnp_Ex_c5123_9089025	2B	1	36	8	49	2.33E-15
wsnp_Ex_c51461_55394646	2B	0	39	6	49	1.01E-16
wsnp_Ex_c51661_55533018	2B	0	37	4	53	5.39E-19
wsnp_Ex_c5239_9272511	2B	0	42	5	47	3.84E-17
wsnp_Ex_c52405_56014689	2B	0	37	4	53	5.39E-19
wsnp_Ex_c55735_58127324	2B	0	35	5	54	1.08E-18
wsnp_Ex_c56027_58308093	2B	0	42	5	47	3.84E-17
wsnp_Ex_c5619_9884202	2B	1	36	0	57	5.57E-23
wsnp_Ex_c62844_62315607	2B	0	39	6	49	1.01E-16
wsnp_Ex_c6471_11241582	2B	0	38	4	52	1.02E-18
wsnp_Ex_c65790_64067038	2B	0	38	4	52	1.02E-18
wsnp_Ex_c7003_12065567	2B	0	37	4	53	5.39E-19
wsnp_Ex_c7003_12065828	2B	0	37	4	53	5.39E-19
wsnp_Ex_c7203_12370983	2B	1	35	5	53	2.52E-18
wsnp_Ex_c741_1456698	2B	0	42	5	47	3.84E-17
wsnp_Ex_c7776_13247365	2B	1	44	6	43	4.74E-16
wsnp_Ex_c8641_14485630	2B	0	37	4	53	5.39E-19
wsnp_Ex_c922_1775246	2B	0	38	5	51	8.30E-18
wsnp_Ex_c9729_16071358	2B	1	37	5	51	9.99E-18
wsnp_Ex_rep_c101906_87187119	2B	0	40	6	48	1.48E-16
wsnp_Ex_rep_c102127_87360034	2B	2	33	6	53	1.01E-17
wsnp_Ex_rep_c102216_87433489	2B	0	40	5	49	2.12E-17
wsnp_Ex_rep_c103248_88252209	2B	0	37	4	53	5.39E-19
wsnp_Ex_rep_c103248_88252281	2B	3	37	1	53	7.53E-21
wsnp_Ex_rep_c103381_88353000	2B	0	48	4	42	5.60E-18
wsnp_Ex_rep_c105129_89641882	2B	0	37	6	51	3.64E-17
wsnp_Ex_rep_c106085_90293854	2B	0	40	5	49	2.12E-17
wsnp_Ex_rep_c108679_91802578	2B	0	38	4	52	1.02E-18
wsnp_Ex_rep_c66524_64799410	2B	3	38	2	51	1.36E-19
wsnp_Ex_rep_c67543_66165372	2B	2	37	2	53	3.26E-20
wsnp_Ex_rep_c67561_66188180	2B	3	33	6	52	2.42E-17
wsnp_Ex_rep_c69928_68889568	2B	0	37	4	53	5.39E-19
wsnp_Ex_rep_c72511_70872203	2B	0	43	5	46	4.56E-17
wsnp_JD_c1236_1789566	2B	0	38	7	49	4.53E-16
wsnp_JD_c12687_12877994	2B	0	42	5	47	3.84E-17
wsnp_JD_c29301_23358365	2B	1	37	4	52	1.20E-18
wsnp_JD_c3732_4781170	2B	2	44	4	44	2.22E-17
wsnp_JD_c42879_30043973	2B	0	43	5	46	4.56E-17
wsnp_JD_c4699_5834958	2B	1	37	7	49	5.69E-16
wsnp_JD_c47318_32176833	2B	0	36	5	53	2.32E-18
wsnp_JD_c52_87219	2B	2	36	5	51	1.17E-17
wsnp_JD_c6350_7516597	2B	1	45	0	48	5.80E-21
wsnp_JD_c640_960796	2B	0	44	6	44	2.93E-16
wsnp_JD_c8085_9129899	2B	2	42	6	44	7.50E-16
wsnp_JD_c9251_10121369	2B	0	39	4	51	1.78E-18
wsnp_JD_rep_c67103_42432235	2B	0	36	3	55	2.77E-20
wsnp_Ku_c13905_22034406	2B	0	39	6	49	1.01E-16
wsnp_Ku_c2725_5163091	2B	1	38	6	49	1.30E-16
wsnp_Ku_c31_62657	2B	1	44	4	45	1.34E-17
wsnp_Ku_c3663_6748611	2B	0	40	5	49	2.12E-17
wsnp_Ku_c37269_46153087	2B	0	38	4	52	1.02E-18
wsnp_Ku_c4962_8872507	2B	0	43	5	46	4.56E-17
wsnp_Ku_c58640_61287250	2B	0	38	4	52	1.02E-18
wsnp_Ku_rep_c71678_71421327	2B	0	37	4	53	5.39E-19
wsnp_Ra_c13679_21569624	2B	6	40	0	48	3.76E-20
wsnp_Ra_c1501_2991585	2B	1	39	6	48	2.01E-16
wsnp_Ra_c1660_3275687	2B	1	43	6	44	4.74E-16
wsnp_Ra_c16822_25566950	2B	0	39	6	49	1.01E-16
wsnp_Ra_c28955_38371323	2B	0	36	5	53	2.32E-18
wsnp_Ra_c407_862316	2B	0	43	7	44	1.63E-15
wsnp_Ra_c46023_52004149	2B	0	40	6	48	1.48E-16
wsnp_Ra_rep_c74497_72390803	2B	3	41	0	50	7.13E-21
wsnp_RFL_Contig3522_3685860	2B	4	38	0	52	3.24E-21
wsnp_RFL_Contig3802_4108582	2B	0	37	4	53	5.39E-19
wsnp_RFL_Contig3917_4326857	2B	1	35	7	51	1.71E-16
BobWhite_c11022_78	2D	0	57	1	36	2.57E-22
BobWhite_c12090_117	2D	1	40	2	51	8.71E-20
BobWhite_c13924_707	2D	1	40	3	50	7.24E-19
BobWhite_c16917_732	2D	0	41	3	50	5.45E-19
BobWhite_c27617_294	2D	3	41	0	50	7.13E-21
BobWhite_c28250_220	2D	1	41	3	49	1.07E-18
BobWhite_c32336_198	2D	0	41	4	49	4.16E-18
BobWhite_c32336_504	2D	0	41	4	49	4.16E-18
BobWhite_c36072_272	2D	0	48	5	41	2.98E-17
BobWhite_c38419_677	2D	0	41	2	51	6.70E-20
BobWhite_c47086_539	2D	0	48	5	41	2.98E-17
BobWhite_c8982_226	2D	0	41	3	50	5.45E-19
BobWhite_rep_c50186_469	2D	0	41	3	50	5.45E-19
BobWhite_rep_c51247_189	2D	0	41	3	50	5.45E-19
BobWhite_rep_c51612_864	2D	0	51	6	37	3.64E-17
BobWhite_rep_c53418_120	2D	0	41	3	50	5.45E-19
BobWhite_rep_c65414_271	2D	1	40	2	51	8.71E-20
BS00010514_51	2D	1	47	5	41	5.58E-17
BS00015680_51	2D	0	45	4	45	8.22E-18
BS00021718_51	2D	0	44	7	43	1.63E-15
BS00021923_51	2D	0	48	5	41	2.98E-17
BS00022211_51	2D	0	49	5	40	2.12E-17
BS00022900_51	2D	1	52	5	36	5.24E-18
BS00022957_51	2D	0	55	3	36	2.77E-20
BS00023099_51	2D	0	54	3	37	5.96E-20
BS00024884_51	2D	1	40	3	50	7.24E-19
BS00029208_51	2D	1	58	2	33	3.86E-22
BS00043082_51	2D	1	44	5	44	8.22E-17
BS00044720_51	2D	0	51	6	37	3.64E-17
BS00047901_51	2D	2	56	2	34	2.74E-21
BS00062864_51	2D	0	48	5	41	2.98E-17
BS00063225_51	2D	0	50	7	37	2.72E-16
BS00063517_51	2D	1	50	5	38	1.75E-17
BS00063674_51	2D	1	48	3	42	1.44E-18
BS00063710_51	2D	0	49	5	40	2.12E-17
BS00063748_51	2D	0	51	5	38	8.30E-18
BS00065147_51	2D	0	48	5	41	2.98E-17
BS00065701_51	2D	0	48	5	41	2.98E-17
BS00065717_51	2D	1	42	1	50	2.32E-20
BS00065946_51	2D	0	44	7	43	1.63E-15
BS00067698_51	2D	0	58	2	34	4.24E-22
BS00067927_51	2D	3	40	32	19	0.000143146
BS00069899_51	2D	2	47	0	45	1.01E-20
BS00071755_51	2D	1	57	2	34	1.08E-21
BS00073229_51	2D	0	48	5	41	2.98E-17
BS00073230_51	2D	3	48	1	42	8.45E-20
BS00076261_51	2D	0	51	6	37	3.64E-17
BS00080239_51	2D	0	44	7	43	1.63E-15
BS00080749_51	2D	1	47	5	41	5.58E-17
BS00081578_51	2D	0	48	5	41	2.98E-17
BS00082604_51	2D	0	51	6	37	3.64E-17
BS00082605_51	2D	1	51	6	36	4.26E-17
BS00083504_51	2D	1	44	7	42	2.57E-15
BS00097126_51	2D	1	51	5	37	9.99E-18
BS00106937_51	2D	0	48	6	40	1.48E-16
CAP12_rep_c5547_123	2D	0	41	3	50	5.45E-19
D_contig14237_449	2D	0	40	0	54	4.82E-22
D_contig16084_234	2D	2	56	2	34	2.74E-21
D_contig25212_98	2D	0	44	7	43	1.63E-15
D_contig31797_313	2D	0	47	5	42	3.84E-17
D_contig36004_217	2D	1	43	5	45	7.87E-17
D_contig77859_59	2D	0	51	6	37	3.64E-17
D_contig80448_280	2D	1	41	0	52	1.74E-21
D_F1BEJMU01A0OMY_356	2D	0	55	3	36	2.77E-20
D_F1BEJMU02GB94Z_188	2D	2	55	3	34	2.89E-20
Ex_c10068_1509	2D	2	40	1	51	2.04E-20
Ex_c27573_760	2D	0	43	6	45	2.81E-16
Excalibur_c1027_927	2D	1	41	3	49	1.07E-18
Excalibur_c11133_209	2D	0	41	3	50	5.45E-19
Excalibur_c13046_700	2D	1	40	3	50	7.24E-19
Excalibur_c1451_660	2D	0	40	3	51	3.56E-19
Excalibur_c15426_661	2D	2	40	1	51	2.04E-20
Excalibur_c16329_493	2D	1	47	1	45	4.42E-20
Excalibur_c18353_55	2D	2	40	1	51	2.04E-20
Excalibur_c21486_352	2D	1	41	2	50	1.34E-19
Excalibur_c21749_470	2D	0	40	3	51	3.56E-19
Excalibur_c22315_894	2D	0	48	6	40	1.48E-16
Excalibur_c23239_718	2D	0	41	3	50	5.45E-19
Excalibur_c23239_783	2D	4	41	25	24	5.56E-06
Excalibur_c23239_961	2D	0	41	3	50	5.45E-19
Excalibur_c2887_131	2D	2	49	3	40	1.45E-18
Excalibur_c30328_713	2D	0	41	3	50	5.45E-19
Excalibur_c4303_206	2D	0	49	4	41	4.16E-18
Excalibur_c44325_92	2D	0	40	4	50	2.84E-18
Excalibur_c60081_474	2D	1	54	3	36	6.52E-20
Excalibur_c6681_580	2D	8	40	2	44	8.74E-18
Excalibur_c74714_108	2D	1	41	2	50	1.34E-19
Excalibur_c77484_60	2D	0	41	3	50	5.45E-19
Excalibur_c8720_1073	2D	3	40	3	48	2.84E-18
Excalibur_c95944_72	2D	1	41	3	49	1.07E-18
Excalibur_rep_c104620_183	2D	3	40	1	50	4.18E-20
Excalibur_rep_c67599_2154	2D	2	45	3	44	3.46E-18
Excalibur_rep_c67599_242	2D	0	45	5	44	4.96E-17
Excalibur_rep_c70308_701	2D	3	41	0	50	7.13E-21
Excalibur_rep_c86288_514	2D	0	41	3	50	5.45E-19
GENE-0638_1119	2D	2	41	2	49	2.63E-19
GENE-0638_677	2D	1	42	0	51	2.67E-21
GENE-0638_732	2D	1	46	0	47	6.32E-21
GENE-0684_1033	2D	0	41	3	50	5.45E-19
GENE-0684_1611	2D	0	43	1	50	1.66E-20
GENE-0717_28	2D	5	52	0	37	3.77E-21
GENE-0787_549	2D	2	48	0	44	8.85E-21
GENE-0998_815	2D	3	41	2	48	5.07E-19
GENE-1016_565	2D	9	41	4	40	7.05E-16
GENE-1298_98	2D	0	55	3	36	2.77E-20
GENE-1908_884	2D	0	41	3	50	5.45E-19
GENE-3066_157	2D	0	41	0	53	8.37E-22
GENE-3157_174	2D	0	41	0	53	8.37E-22
GENE-4595_130	2D	0	40	3	51	3.56E-19
IAAV3173	2D	3	50	1	40	4.18E-20
IAAV4282	2D	4	44	3	43	9.35E-18
IAAV6032	2D	0	45	5	44	4.96E-17
IAAV6312	2D	0	51	4	39	1.78E-18
IAAV691	2D	1	48	4	41	7.97E-18
IAAV8053	2D	2	41	2	49	2.63E-19
IAAV9128	2D	1	46	4	43	1.23E-17
IACX5670	2D	0	44	7	43	1.63E-15
JD_c63957_1176	2D	0	56	6	32	6.39E-19
Ku_c674_915	2D	1	41	0	52	1.74E-21
Kukri_c1016_2269	2D	0	48	5	41	2.98E-17
Kukri_c14696_214	2D	0	41	4	49	4.16E-18
Kukri_c16557_855	2D	0	51	5	38	8.30E-18
Kukri_c19434_936	2D	1	57	0	36	5.57E-23
Kukri_c26697_366	2D	5	33	10	46	3.62E-13
Kukri_c29592_559	2D	1	43	0	50	3.77E-21
Kukri_c30439_2407	2D	0	58	0	36	2.25E-23
Kukri_c31121_1011	2D	0	40	3	51	3.56E-19
Kukri_c31121_1460	2D	0	40	3	51	3.56E-19
Kukri_c3115_279	2D	0	41	3	50	5.45E-19
Kukri_c32355_1027	2D	0	41	3	50	5.45E-19
Kukri_c32355_1089	2D	0	41	3	50	5.45E-19
Kukri_c34647_218	2D	0	41	3	50	5.45E-19
Kukri_c36139_292	2D	0	56	2	36	2.76E-21
Kukri_c4790_1174	2D	0	48	5	41	2.98E-17
Kukri_c49670_857	2D	0	44	7	43	1.63E-15
Kukri_c51309_198	2D	2	41	3	48	2.05E-18
Kukri_c65380_490	2D	0	41	3	50	5.45E-19
Kukri_c8752_281	2D	7	34	1	52	2.24E-20
Kukri_rep_c101148_401	2D	0	40	3	51	3.56E-19
Kukri_rep_c103890_185	2D	0	41	3	50	5.45E-19
Kukri_rep_c114322_506	2D	0	48	5	41	2.98E-17
Kukri_rep_c68903_1100	2D	0	41	3	50	5.45E-19
Kukri_rep_c70958_1044	2D	0	40	3	51	3.56E-19
Kukri_rep_c70958_916	2D	1	40	0	53	1.04E-21
Kukri_rep_c72558_961	2D	0	51	6	37	3.64E-17
Kukri_rep_c72666_625	2D	1	41	3	49	1.07E-18
Kukri_rep_c72959_145	2D	1	41	2	50	1.34E-19
Kukri_rep_c73433_61	2D	1	42	2	49	1.89E-19
RAC875_c10218_944	2D	0	41	4	49	4.16E-18
RAC875_c14797_658	2D	0	41	3	50	5.45E-19
RAC875_c16967_68	2D	0	41	3	50	5.45E-19
RAC875_c17722_1704	2D	0	40	3	51	3.56E-19
RAC875_c20076_907	2D	0	40	3	51	3.56E-19
RAC875_c2176_2416	2D	0	41	3	50	5.45E-19
RAC875_c24876_388	2D	0	41	3	50	5.45E-19
RAC875_c26896_339	2D	1	51	6	36	4.26E-17
RAC875_c29079_177	2D	0	39	4	51	1.78E-18
RAC875_c31493_120	2D	0	51	6	37	3.64E-17
RAC875_c31560_141	2D	1	51	4	38	2.19E-18
RAC875_c3187_873	2D	2	45	0	47	1.01E-20
RAC875_c32340_462	2D	0	41	4	49	4.16E-18
RAC875_c45702_412	2D	0	51	5	38	8.30E-18
RAC875_c46007_340	2D	0	44	7	43	1.63E-15
RAC875_c4851_1600	2D	0	46	5	43	4.56E-17
RAC875_c48856_177	2D	0	41	4	49	4.16E-18
RAC875_c52165_241	2D	6	40	7	41	3.04E-14
RAC875_c52926_871	2D	0	57	3	34	4.64E-21
RAC875_c5342_1312	2D	1	41	3	49	1.07E-18
RAC875_c54391_236	2D	0	40	0	54	4.82E-22
RAC875_c7201_229	2D	1	41	0	52	1.74E-21
RAC875_c78404_242	2D	0	41	3	50	5.45E-19
RAC875_c9897_638	2D	0	43	5	46	4.56E-17
RAC875_rep_c103893_601	2D	1	50	6	37	7.79E-17
RAC875_rep_c114236_188	2D	0	49	5	40	2.12E-17
RAC875_rep_c116200_396	2D	3	44	6	41	1.16E-15
RAC875_rep_c120698_93	2D	0	40	3	51	3.56E-19
RAC875_rep_c69194_867	2D	2	41	2	49	2.63E-19
RAC875_rep_c69388_134	2D	0	41	3	50	5.45E-19
RAC875_rep_c69388_512	2D	0	41	3	50	5.45E-19
RAC875_rep_c69388_778	2D	0	41	3	50	5.45E-19
RAC875_rep_c69619_260	2D	0	41	3	50	5.45E-19
RAC875_rep_c72115_351	2D	0	41	3	50	5.45E-19
RAC875_rep_c72220_143	2D	0	51	6	37	3.64E-17
RAC875_s116170_295	2D	0	43	1	50	1.66E-20
RFL_Contig2460_547	2D	0	41	3	50	5.45E-19
RFL_Contig2656_871	2D	0	39	6	49	1.01E-16
RFL_Contig2862_1287	2D	0	46	0	48	3.71E-21
RFL_Contig3550_457	2D	1	41	0	52	1.74E-21
RFL_Contig5917_2433	2D	0	43	8	43	8.82E-15
RFL_Contig5917_3026	2D	0	44	7	43	1.63E-15
TA001249-1083	2D	1	41	3	49	1.07E-18
TA001366-0072	2D	2	47	2	43	4.43E-19
TA001604-0648	2D	3	54	0	37	7.25E-22
TA006409-1296	2D	0	40	4	50	2.84E-18
TA006853-0521	2D	0	57	0	37	5.50E-23
TA006853-0531	2D	0	57	3	34	4.64E-21
TA008254-1297	2D	2	47	5	40	7.91E-17
TA010191-1338	2D	0	53	3	38	1.18E-19
TA014111-0612	2D	3	42	0	49	1.01E-20
TA021271-0482	2D	0	40	3	51	3.56E-19
TA022134-0255	2D	1	54	3	36	6.52E-20
Tdurum_contig10246_1749	2D	0	42	3	49	7.66E-19
Tdurum_contig29563_257	2D	2	54	5	33	1.12E-18
Tdurum_contig77522_310	2D	3	55	0	36	3.29E-22
tplb0021e03_713	2D	0	40	3	51	3.56E-19
tplb0050m09_1890	2D	0	41	3	50	5.45E-19
tplb0058k20_1741	2D	0	41	3	50	5.45E-19
tplb0062d15_1382	2D	0	41	3	50	5.45E-19
wsnp_BE426620D_Ta_2_2	2D	0	40	4	50	2.84E-18
wsnp_BE444144D_Ta_1_1	2D	0	44	8	42	8.45E-15
wsnp_BE445431D_Ta_2_1	2D	0	41	3	50	5.45E-19
wsnp_BE488779D_Ta_1_2	2D	1	51	3	39	4.51E-19
wsnp_BE490384D_Ta_1_1	2D	0	40	3	51	3.56E-19
wsnp_BE490384D_Ta_1_2	2D	1	40	3	50	7.24E-19
wsnp_BE517946D_Ta_1_2	2D	0	41	4	49	4.16E-18
wsnp_CAP7_c888_455397	2D	0	58	2	34	4.24E-22
wsnp_Ex_c42970_49408712	2D	1	40	3	50	7.24E-19
wsnp_Ex_c58019_59494143	2D	0	56	2	36	2.76E-21
wsnp_Ex_c6400_11123059	2D	0	47	5	42	3.84E-17
wsnp_Ex_c7908_13430703	2D	1	54	3	36	6.52E-20
wsnp_Ex_rep_c80588_75758453	2D	2	51	0	41	3.55E-21
wsnp_Ku_c9269_15583444	2D	0	40	3	51	3.56E-19
BobWhite_c17021_297	3A	0	47	6	41	2.00E-16
BobWhite_c18408_199	3A	8	44	2	40	8.74E-18
BobWhite_c26893_161	3A	0	44	9	41	4.12E-14
BobWhite_c34548_96	3A	0	45	10	39	1.53E-13
BobWhite_c37325_92	3A	2	46	5	41	1.03E-16
BobWhite_c43213_184	3A	4	49	0	41	1.41E-20
BobWhite_c8674_595	3A	0	43	8	43	8.82E-15
BobWhite_rep_c49102_169	3A	0	45	10	39	1.53E-13
BobWhite_s65081_93	3A	0	44	10	40	1.89E-13
BS00000445_51	3A	0	43	8	43	8.82E-15
BS00001478_51	3A	0	43	8	43	8.82E-15
BS00007502_51	3A	1	46	8	39	8.46E-15
BS00009657_51	3A	0	45	10	39	1.53E-13
BS00010204_51	3A	0	47	6	41	2.00E-16
BS00010531_51	3A	0	46	7	41	1.26E-15
BS00021976_51	3A	0	47	5	42	3.84E-17
BS00022862_51	3A	0	46	7	41	1.26E-15
BS00023337_51	3A	1	44	5	44	8.22E-17
BS00024548_51	3A	0	49	6	39	1.01E-16
BS00025191_51	3A	0	48	3	43	9.89E-19
BS00032524_51	3A	0	48	7	39	6.94E-16
BS00034334_51	3A	0	46	7	41	1.26E-15
BS00037400_51	3A	0	47	5	42	3.84E-17
BS00045327_51	3A	0	45	7	42	1.49E-15
BS00048031_51	3A	0	43	11	40	9.62E-13
BS00048757_51	3A	2	48	0	44	8.85E-21
BS00055211_51	3A	0	47	5	42	3.84E-17
BS00056089_51	3A	0	44	8	42	8.45E-15
BS00057445_51	3A	0	44	5	45	4.96E-17
BS00061179_51	3A	0	43	8	43	8.82E-15
BS00062645_51	3A	0	47	6	41	2.00E-16
BS00063300_51	3A	1	41	7	45	2.25E-15
BS00064039_51	3A	1	43	11	39	1.43E-12
BS00065468_51	3A	0	48	7	39	6.94E-16
BS00065956_51	3A	0	48	3	43	9.89E-19
BS00066475_51	3A	3	46	4	41	2.77E-17
BS00067228_51	3A	0	49	6	39	1.01E-16
BS00068520_51	3A	0	45	10	39	1.53E-13
BS00071823_51	3A	1	43	10	40	3.27E-13
BS00074617_51	3A	5	47	0	42	3.56E-20
BS00074926_51	3A	0	38	5	51	8.30E-18
BS00076772_51	3A	2	49	7	36	6.95E-16
BS00080879_51	3A	0	43	8	43	8.82E-15
BS00081688_51	3A	1	41	8	44	1.30E-14
BS00089400_51	3A	0	47	5	42	3.84E-17
BS00091887_51	3A	0	47	3	44	1.17E-18
BS00093377_51	3A	0	45	7	42	1.49E-15
BS00094366_51	3A	0	48	7	39	6.94E-16
BS00097939_51	3A	1	33	6	54	4.18E-18
BS00110129_51	3A	0	47	5	42	3.84E-17
BS00110266_51	3A	0	44	11	39	8.11E-13
CAP11_c1022_117	3A	2	45	7	40	3.33E-15
CAP11_c1022_66	3A	3	45	6	40	9.73E-16
CAP8_c4697_108	3A	1	50	2	41	1.34E-19
D_contig22919_290	3A	0	44	11	39	8.11E-13
Ex_c18484_2026	3A	0	44	11	39	8.11E-13
Ex_c18484_2048	3A	0	44	11	39	8.11E-13
Ex_c67794_487	3A	1	43	9	41	7.04E-14
Excalibur_c10079_1585	3A	0	48	7	39	6.94E-16
Excalibur_c10383_432	3A	0	46	6	42	2.47E-16
Excalibur_c17655_467	3A	0	42	8	44	8.45E-15
Excalibur_c25239_283	3A	0	47	4	43	6.93E-18
Excalibur_c29205_537	3A	0	45	10	39	1.53E-13
Excalibur_c3556_520	3A	1	37	5	51	9.99E-18
Excalibur_c39248_485	3A	0	43	0	51	1.96E-21
Excalibur_c46082_440	3A	0	46	11	37	4.47E-13
Excalibur_c52446_519	3A	0	45	10	39	1.53E-13
Excalibur_c5561_1013	3A	0	44	10	40	1.89E-13
Excalibur_c56240_176	3A	0	42	7	45	1.49E-15
Excalibur_c64302_103	3A	0	47	6	41	2.00E-16
Excalibur_c6501_477	3A	0	43	10	41	2.15E-13
Excalibur_c74666_291	3A	4	47	2	41	9.59E-19
Excalibur_c7610_143	3A	5	38	0	51	7.07E-21
Excalibur_c854_1459	3A	0	44	0	50	2.64E-21
Excalibur_rep_c102974_175	3A	4	45	4	41	5.01E-17
Excalibur_rep_c110278_62	3A	0	56	0	38	1.23E-22
Excalibur_s113043_59	3A	2	45	6	41	6.59E-16
GENE-1549_110	3A	0	42	8	44	8.45E-15
GENE-1981_131	3A	0	42	8	44	8.45E-15
GENE-4795_75	3A	0	46	11	37	4.47E-13
IAAV1155	3A	0	46	6	42	2.47E-16
IAAV2423	3A	0	33	7	54	1.51E-17
IAAV2646	3A	0	48	7	39	6.94E-16
IAAV5729	3A	0	48	3	43	9.89E-19
IAAV6974	3A	0	47	5	42	3.84E-17
IAAV8483	3A	1	44	7	42	2.57E-15
IAAV902	3A	0	44	11	39	8.11E-13
IACX6065	3A	0	47	3	44	1.17E-18
Jagger_c8039_67	3A	0	47	5	42	3.84E-17
JD_c1187_1398	3A	0	47	6	41	2.00E-16
Ku_c12191_1123	3A	2	36	3	53	1.51E-19
Ku_c14982_168	3A	0	44	9	41	4.12E-14
Ku_c17569_905	3A	0	46	7	41	1.26E-15
Ku_c19285_555	3A	4	45	0	45	2.86E-20
Ku_c26872_269	3A	5	34	1	54	3.81E-21
Ku_c56370_1155	3A	1	44	10	39	2.76E-13
Kukri_c1307_1223	3A	0	44	9	41	4.12E-14
Kukri_c13830_556	3A	1	46	6	41	3.66E-16
Kukri_c28650_111	3A	0	48	0	46	3.71E-21
Kukri_c34195_357	3A	0	45	10	39	1.53E-13
Kukri_c49927_151	3A	0	44	5	45	4.96E-17
Kukri_c5459_334	3A	1	42	10	41	3.57E-13
Kukri_c54729_181	3A	0	47	6	41	2.00E-16
Kukri_c80104_809	3A	0	45	10	39	1.53E-13
Kukri_rep_c102095_679	3A	0	44	9	41	4.12E-14
Kukri_rep_c106620_208	3A	7	45	1	41	7.71E-19
Kukri_rep_c112061_617	3A	0	45	7	42	1.49E-15
Kukri_rep_c69970_717	3A	0	41	8	45	7.44E-15
Kukri_rep_c89183_282	3A	0	48	6	40	1.48E-16
Kukri_s117946_404	3A	3	38	0	53	1.46E-21
Ra_c11263_2353	3A	2	42	10	40	5.56E-13
Ra_c5515_1723	3A	0	45	10	39	1.53E-13
Ra_c5515_2396	3A	0	45	10	39	1.53E-13
Ra_c6118_350	3A	0	47	6	41	2.00E-16
Ra_c88203_1055	3A	0	44	10	40	1.89E-13
Ra_c88203_455	3A	0	44	10	40	1.89E-13
Ra_c88203_468	3A	0	44	10	40	1.89E-13
RAC875_c10194_673	3A	0	44	6	44	2.93E-16
RAC875_c10194_910	3A	6	43	1	44	5.56E-19
RAC875_c13895_763	3A	0	44	10	40	1.89E-13
RAC875_c20134_535	3A	0	46	6	42	2.47E-16
RAC875_c2464_274	3A	0	48	7	39	6.94E-16
RAC875_c24982_202	3A	0	39	7	48	6.94E-16
RAC875_c27323_867	3A	0	46	7	41	1.26E-15
RAC875_c3427_734	3A	0	45	10	39	1.53E-13
RAC875_c47550_437	3A	1	40	8	45	1.10E-14
RAC875_c52195_324	3A	0	49	7	38	4.53E-16
RAC875_c56516_786	3A	6	33	0	55	3.18E-22
RAC875_c61934_186	3A	0	35	6	53	9.33E-18
RAC875_rep_c104403_524	3A	3	43	7	41	6.81E-15
RAC875_rep_c106170_204	3A	1	36	6	51	4.26E-17
RAC875_rep_c109433_782	3A	0	43	8	43	8.82E-15
RAC875_rep_c70746_582	3A	0	45	8	41	7.44E-15
RAC875_rep_c90531_283	3A	2	46	0	46	1.05E-20
RFL_Contig1798_1606	3A	0	44	9	41	4.12E-14
RFL_Contig1896_1236	3A	1	45	2	46	3.17E-19
RFL_Contig4399_956	3A	1	43	9	41	7.04E-14
TA001885-0568	3A	1	49	3	41	1.07E-18
TA005795-0543	3A	0	44	10	40	1.89E-13
Tdurum_contig11121_739	3A	0	46	11	37	4.47E-13
Tdurum_contig11121_834	3A	0	46	11	37	4.47E-13
Tdurum_contig13646_225	3A	0	36	5	53	2.32E-18
Tdurum_contig22253_104	3A	4	44	0	46	2.74E-20
Tdurum_contig28699_54	3A	0	54	0	40	4.82E-22
Tdurum_contig31235_99	3A	0	38	6	50	6.33E-17
Tdurum_contig42495_389	3A	0	46	7	41	1.26E-15
Tdurum_contig50392_1355	3A	3	45	2	44	8.59E-19
Tdurum_contig52302_649	3A	0	45	7	42	1.49E-15
Tdurum_contig57139_318	3A	0	43	12	39	4.04E-12
Tdurum_contig57693_581	3A	0	44	9	41	4.12E-14
Tdurum_contig57753_138	3A	0	47	5	42	3.84E-17
Tdurum_contig62502_90	3A	0	47	5	42	3.84E-17
Tdurum_contig63129_238	3A	3	44	7	40	5.97E-15
Tdurum_contig68855_91	3A	2	44	8	40	1.96E-14
Tdurum_contig697_73	3A	0	47	5	42	3.84E-17
Tdurum_contig86206_149	3A	0	47	8	39	4.46E-15
wsnp_BE443995B_Ta_2_2	3A	0	45	7	42	1.49E-15
wsnp_BF429272A_Ta_2_1	3A	0	43	10	41	2.15E-13
wsnp_CAP11_c2438_1258747	3A	0	48	5	41	2.98E-17
wsnp_CAP11_c318_261649	3A	0	45	10	39	1.53E-13
wsnp_CAP8_c6939_3242530	3A	0	46	8	40	6.01E-15
wsnp_Ex_c11039_17902115	3A	0	44	8	42	8.45E-15
wsnp_Ex_c11397_18400400	3A	0	44	9	41	4.12E-14
wsnp_Ex_c14681_22747500	3A	0	44	8	42	8.45E-15
wsnp_Ex_c15269_23491104	3A	0	44	12	38	3.27E-12
wsnp_Ex_c15269_23492289	3A	4	52	0	38	3.24E-21
wsnp_Ex_c15674_24004513	3A	0	48	3	43	9.89E-19
wsnp_Ex_c1894_3575749	3A	0	44	6	44	2.93E-16
wsnp_Ex_c1903_3592518	3A	4	47	0	43	2.40E-20
wsnp_Ex_c20250_29303152	3A	0	47	3	44	1.17E-18
wsnp_Ex_c2148_4035913	3A	9	43	2	40	1.56E-17
wsnp_Ex_c22683_31887799	3A	0	47	6	41	2.00E-16
wsnp_Ex_c2678_4968284	3A	0	43	10	41	2.15E-13
wsnp_Ex_c28310_37444843	3A	0	44	8	42	8.45E-15
wsnp_Ex_c32003_40728918	3A	0	45	10	39	1.53E-13
wsnp_Ex_c3478_6369892	3A	0	47	6	41	2.00E-16
wsnp_Ex_c53364_56625806	3A	2	45	6	41	6.59E-16
wsnp_Ex_c5929_10402147	3A	0	45	8	41	7.44E-15
wsnp_Ex_c6217_10848574	3A	0	47	5	42	3.84E-17
wsnp_Ex_c8884_14841846	3A	0	43	8	43	8.82E-15
wsnp_Ex_c9145_15214903	3A	0	44	11	39	8.11E-13
wsnp_Ex_c9483_15722127	3A	1	42	8	43	1.42E-14
wsnp_Ex_rep_c101340_86719239	3A	0	46	7	41	1.26E-15
wsnp_Ex_rep_c108072_91444417	3A	0	44	9	41	4.12E-14
wsnp_Ex_rep_c66274_64426901	3A	0	36	5	53	2.32E-18
wsnp_Ex_rep_c66763_65120251	3A	3	47	4	40	2.13E-17
wsnp_Ex_rep_c67727_66398596	3A	0	47	5	42	3.84E-17
wsnp_Ex_rep_c69752_68711460	3A	1	43	11	39	1.43E-12
wsnp_JD_c11273_11770307	3A	1	44	7	42	2.57E-15
wsnp_JD_c2722_3653988	3A	0	45	7	42	1.49E-15
wsnp_JD_rep_c64325_41024646	3A	0	48	5	41	2.98E-17
wsnp_Ku_c10362_17156084	3A	1	46	0	47	6.32E-21
wsnp_Ku_c11052_18135847	3A	0	46	7	41	1.26E-15
wsnp_Ku_c1307_2606226	3A	4	44	4	42	5.72E-17
wsnp_Ku_c18497_27803432	3A	1	41	9	43	7.04E-14
wsnp_Ku_c217_430915	3A	1	37	5	51	9.99E-18
wsnp_Ku_c3343_6206887	3A	0	44	9	41	4.12E-14
wsnp_Ku_c3956_7237642	3A	21	28	1	44	3.03E-17
wsnp_Ku_c3956_7237707	3A	0	43	9	42	4.49E-14
wsnp_Ku_c44089_51445136	3A	5	47	0	42	3.56E-20
wsnp_Ku_c4568_8243775	3A	1	47	3	43	1.79E-18
wsnp_Ku_c4886_8753646	3A	2	45	6	41	6.59E-16
wsnp_Ku_c8400_14280021	3A	0	42	8	44	8.45E-15
wsnp_Ku_c9433_15811664	3A	0	45	10	39	1.53E-13
wsnp_Ra_c44141_50623811	3A	0	46	7	41	1.26E-15
wsnp_Ra_c5454_9660204	3A	1	37	4	52	1.20E-18
wsnp_Ra_rep_c106523_90273922	3A	0	45	7	42	1.49E-15
wsnp_RFL_Contig3396_3515504	3A	0	44	10	40	1.89E-13
wsnp_RFL_Contig3866_4228783	3A	0	47	5	42	3.84E-17
wsnp_RFL_Contig429_4978628	3A	0	45	10	39	1.53E-13
wsnp_RFL_Contig4814_5829093	3A	0	44	10	40	1.89E-13
BobWhite_c10402_140	3B	2	44	6	42	7.50E-16
BobWhite_c11540_60	3B	0	47	6	41	2.00E-16
BobWhite_c12281_752	3B	0	45	12	37	2.43E-12
BobWhite_c12457_433	3B	0	45	7	42	1.49E-15
BobWhite_c13099_755	3B	3	44	9	38	1.29E-13
BobWhite_c17021_269	3B	1	40	11	42	1.63E-12
BobWhite_c17332_325	3B	0	46	7	41	1.26E-15
BobWhite_c25670_425	3B	0	44	5	45	4.96E-17
BobWhite_c32864_250	3B	6	45	6	37	2.70E-15
BobWhite_c33344_143	3B	10	42	5	37	5.19E-15
BobWhite_c3902_175	3B	0	42	11	41	1.05E-12
BobWhite_c40244_73	3B	0	45	10	39	1.53E-13
BobWhite_c40305_243	3B	1	45	11	37	8.53E-13
BobWhite_c40861_320	3B	0	45	11	38	6.28E-13
BobWhite_c634_420	3B	0	46	5	43	4.56E-17
BobWhite_c7454_492	3B	0	40	12	42	4.59E-12
BobWhite_c9711_71	3B	4	39	0	51	5.78E-21
BobWhite_rep_c53007_100	3B	0	45	11	38	6.28E-13
BobWhite_rep_c55395_200	3B	1	42	9	42	7.35E-14
BobWhite_rep_c64944_264	3B	0	46	11	37	4.47E-13
BobWhite_rep_c66990_294	3B	0	44	12	38	3.27E-12
BS00003522_51	3B	0	45	6	43	2.81E-16
BS00011111_51	3B	0	42	9	43	4.49E-14
BS00011438_51	3B	2	43	7	42	4.32E-15
BS00011570_51	3B	0	43	9	42	4.49E-14
BS00011596_51	3B	0	55	0	39	2.54E-22
BS00011869_51	3B	0	44	11	39	8.11E-13
BS00016407_51	3B	0	42	10	42	2.24E-13
BS00018764_51	3B	0	41	6	47	2.00E-16
BS00022242_51	3B	0	44	8	42	8.45E-15
BS00022316_51	3B	0	44	12	38	3.27E-12
BS00022387_51	3B	1	41	5	47	5.58E-17
BS00022403_51	3B	0	45	8	41	7.44E-15
BS00022512_51	3B	1	45	11	37	8.53E-13
BS00022861_51	3B	0	38	6	50	6.33E-17
BS00023017_51	3B	0	43	5	46	4.56E-17
BS00023074_51	3B	0	42	9	43	4.49E-14
BS00024883_51	3B	0	43	5	46	4.56E-17
BS00025114_51	3B	0	42	9	43	4.49E-14
BS00029548_51	3B	2	46	4	42	1.86E-17
BS00030534_51	3B	0	46	7	41	1.26E-15
BS00032830_51	3B	0	42	10	42	2.24E-13
BS00033372_51	3B	0	45	11	38	6.28E-13
BS00037871_51	3B	0	46	4	44	7.87E-18
BS00039218_51	3B	0	44	5	45	4.96E-17
BS00040742_51	3B	0	47	9	38	1.92E-14
BS00045195_51	3B	0	42	9	43	4.49E-14
BS00046052_51	3B	0	42	9	43	4.49E-14
BS00049570_51	3B	0	46	5	43	4.56E-17
BS00049615_51	3B	1	46	4	43	1.23E-17
BS00049639_51	3B	0	46	8	40	6.01E-15
BS00058654_51	3B	0	44	13	37	1.24E-11
BS00060073_51	3B	0	45	9	40	3.48E-14
BS00062734_51	3B	0	45	9	40	3.48E-14
BS00062827_51	3B	0	46	11	37	4.47E-13
BS00062963_51	3B	2	40	7	45	3.33E-15
BS00064776_51	3B	3	50	5	36	2.56E-17
BS00065934_51	3B	0	44	0	50	2.64E-21
BS00066108_51	3B	0	42	9	43	4.49E-14
BS00066467_51	3B	1	45	10	38	2.13E-13
BS00066718_51	3B	2	52	0	40	2.20E-21
BS00066904_51	3B	4	45	1	44	2.05E-19
BS00071041_51	3B	0	47	4	43	6.93E-18
BS00071597_51	3B	0	47	4	43	6.93E-18
BS00072151_51	3B	0	46	6	42	2.47E-16
BS00073411_51	3B	0	45	6	43	2.81E-16
BS00074287_51	3B	0	46	5	43	4.56E-17
BS00079014_51	3B	0	42	9	43	4.49E-14
BS00079029_51	3B	2	42	8	42	2.33E-14
BS00079989_51	3B	10	31	16	37	6.67E-08
BS00083706_51	3B	7	44	3	40	3.50E-17
BS00086717_51	3B	0	42	9	43	4.49E-14
BS00090945_51	3B	0	46	6	42	2.47E-16
BS00091577_51	3B	1	46	6	41	3.66E-16
BS00095515_51	3B	1	37	6	50	7.79E-17
BS00097481_51	3B	4	46	1	43	1.87E-19
BS00098161_51	3B	1	50	10	33	1.61E-14
BS00098496_51	3B	2	46	6	40	5.30E-16
BS00098868_51	3B	0	41	12	41	4.79E-12
BS00102622_51	3B	1	43	9	41	7.04E-14
BS00102641_51	3B	7	45	11	31	2.99E-12
BS00105741_51	3B	1	40	11	42	1.63E-12
BS00106922_51	3B	0	46	7	41	1.26E-15
BS00110072_51	3B	0	43	12	39	4.04E-12
BS00111294_51	3B	0	41	11	42	1.05E-12
CAP12_c3551_85	3B	0	46	10	38	1.13E-13
CAP7_c3916_256	3B	0	46	6	42	2.47E-16
CAP8_rep_c4453_136	3B	0	51	1	42	1.18E-20
D_GCE8AKX01C0776_247	3B	0	45	11	38	6.28E-13
Excalibur_c14273_1407	3B	0	46	6	42	2.47E-16
Excalibur_c14803_1088	3B	1	46	0	47	6.32E-21
Excalibur_c15095_831	3B	0	47	4	43	6.93E-18
Excalibur_c15095_852	3B	0	47	4	43	6.93E-18
Excalibur_c16569_765	3B	3	48	0	43	1.32E-20
Excalibur_c16703_430	3B	0	47	4	43	6.93E-18
Excalibur_c18410_136	3B	0	44	9	41	4.12E-14
Excalibur_c18641_1849	3B	0	46	6	42	2.47E-16
Excalibur_c18645_857	3B	2	55	0	37	3.11E-22
Excalibur_c20309_539	3B	6	42	2	44	3.71E-18
Excalibur_c24391_321	3B	0	44	5	45	4.96E-17
Excalibur_c24830_415	3B	0	51	0	43	1.96E-21
Excalibur_c25566_1000	3B	0	44	5	45	4.96E-17
Excalibur_c27055_1326	3B	0	46	7	41	1.26E-15
Excalibur_c30975_133	3B	7	46	0	41	9.62E-20
Excalibur_c35491_788	3B	0	42	11	41	1.05E-12
Excalibur_c38785_222	3B	3	45	8	38	2.21E-14
Excalibur_c48047_90	3B	0	45	12	37	2.43E-12
Excalibur_c48841_1380	3B	0	51	1	42	1.18E-20
Excalibur_c50808_326	3B	0	41	6	47	2.00E-16
Excalibur_c5309_286	3B	0	45	8	41	7.44E-15
Excalibur_c54388_193	3B	2	47	5	40	7.91E-17
Excalibur_c59479_514	3B	0	44	12	38	3.27E-12
Excalibur_c60319_127	3B	0	45	11	38	6.28E-13
Excalibur_c63009_102	3B	0	43	3	48	9.89E-19
Excalibur_c63730_660	3B	0	46	7	41	1.26E-15
Excalibur_c6782_253	3B	5	50	0	39	1.21E-20
Excalibur_c8284_580	3B	4	46	2	42	1.20E-18
Excalibur_c8314_405	3B	0	47	0	47	3.87E-21
Excalibur_c9001_569	3B	3	46	3	42	4.82E-18
Excalibur_c94546_61	3B	0	44	13	37	1.24E-11
Excalibur_rep_c101410_789	3B	0	44	10	40	1.89E-13
Excalibur_rep_c102300_102	3B	0	43	10	41	2.15E-13
Excalibur_rep_c104532_80	3B	0	41	6	47	2.00E-16
Excalibur_rep_c113405_180	3B	0	45	13	36	8.79E-12
Excalibur_rep_c66942_58	3B	0	47	10	37	7.73E-14
Excalibur_rep_c67448_528	3B	0	41	5	48	2.98E-17
Excalibur_rep_c68583_1067	3B	1	42	8	43	1.42E-14
Excalibur_rep_c70658_301	3B	1	44	9	40	6.19E-14
Excalibur_rep_c71645_94	3B	6	54	0	34	8.26E-22
GENE-1805_65	3B	0	44	10	40	1.89E-13
GENE-1851_76	3B	1	38	9	46	3.69E-14
GENE-2405_141	3B	2	47	3	42	2.66E-18
GENE-2405_488	3B	0	47	4	43	6.93E-18
GENE-2712_130	3B	0	47	0	47	3.87E-21
GENE-2712_367	3B	0	47	4	43	6.93E-18
GENE-2712_428	3B	0	47	5	42	3.84E-17
GENE-4774_69	3B	0	42	9	43	4.49E-14
GENE-4918_283	3B	1	42	3	48	1.44E-18
GENE-4927_846	3B	1	47	9	37	2.51E-14
IAAV1043	3B	1	44	0	49	4.88E-21
IAAV1405	3B	1	42	10	41	3.57E-13
IAAV1797	3B	0	45	12	37	2.43E-12
IAAV3924	3B	1	44	6	43	4.74E-16
IAAV4105	3B	1	44	6	43	4.74E-16
IAAV4613	3B	0	45	11	38	6.28E-13
IAAV51	3B	0	42	9	43	4.49E-14
IAAV5505	3B	2	46	3	43	3.17E-18
IAAV5835	3B	5	45	8	36	4.01E-14
IAAV6442	3B	0	41	6	47	2.00E-16
IAAV6566	3B	0	46	11	37	4.47E-13
IAAV8162	3B	1	42	10	41	3.57E-13
IAAV958	3B	1	46	6	41	3.66E-16
IACX20464	3B	3	48	0	43	1.32E-20
IACX3426	3B	1	44	12	37	4.51E-12
IACX5852	3B	3	42	6	43	1.27E-15
Jagger_c1219_603	3B	0	46	5	43	4.56E-17
JD_c49225_324	3B	2	45	9	38	6.98E-14
Ku_c1005_1173	3B	0	46	6	42	2.47E-16
Ku_c101932_436	3B	0	44	12	38	3.27E-12
Ku_c23179_1250	3B	0	45	7	42	1.49E-15
Ku_c8631_308	3B	0	46	6	42	2.47E-16
Kukri_c13537_2069	3B	0	46	6	42	2.47E-16
Kukri_c16742_415	3B	0	42	9	43	4.49E-14
Kukri_c18009_398	3B	5	47	0	42	3.56E-20
Kukri_c21467_571	3B	5	46	1	42	2.85E-19
Kukri_c21818_519	3B	0	44	10	40	1.89E-13
Kukri_c23228_137	3B	1	42	0	51	2.67E-21
Kukri_c23958_187	3B	1	42	9	42	7.35E-14
Kukri_c25447_489	3B	1	47	0	46	6.32E-21
Kukri_c3168_521	3B	0	42	9	43	4.49E-14
Kukri_c32803_150	3B	3	50	6	35	1.08E-16
Kukri_c33486_128	3B	5	42	0	47	3.56E-20
Kukri_c35146_2094	3B	3	42	9	40	1.84E-13
Kukri_c37029_761	3B	2	45	3	44	3.46E-18
Kukri_c4074_463	3B	0	44	7	43	1.63E-15
Kukri_c40909_784	3B	0	46	6	42	2.47E-16
Kukri_c4335_775	3B	0	45	11	38	6.28E-13
Kukri_c45609_882	3B	0	46	4	44	7.87E-18
Kukri_c46948_558	3B	1	42	9	42	7.35E-14
Kukri_c54571_224	3B	2	42	7	43	4.32E-15
Kukri_c7860_911	3B	1	41	8	44	1.30E-14
Kukri_rep_c101341_425	3B	2	44	1	47	6.90E-20
Kukri_rep_c106420_312	3B	0	45	11	38	6.28E-13
Kukri_rep_c107323_210	3B	0	44	13	37	1.24E-11
Kukri_rep_c110544_248	3B	0	42	10	42	2.24E-13
Kukri_rep_c70097_286	3B	7	46	1	40	6.12E-19
Kukri_rep_c74178_178	3B	8	42	0	44	2.02E-19
Kukri_rep_c93484_422	3B	1	47	8	38	6.00E-15
Ra_c17608_960	3B	0	44	11	39	8.11E-13
Ra_c29672_532	3B	0	45	11	38	6.28E-13
Ra_c58335_189	3B	0	44	14	36	4.38E-11
RAC875_c100413_60	3B	0	44	7	43	1.63E-15
RAC875_c10246_839	3B	5	42	6	41	3.38E-15
RAC875_c10628_1253	3B	1	42	9	42	7.35E-14
RAC875_c14696_369	3B	3	44	10	37	5.46E-13
RAC875_c161_228	3B	0	43	13	38	1.59E-11
RAC875_c17269_645	3B	1	44	11	38	1.15E-12
RAC875_c17884_616	3B	0	45	6	43	2.81E-16
RAC875_c18058_1070	3B	1	47	9	37	2.51E-14
RAC875_c21086_130	3B	7	44	2	41	5.76E-18
RAC875_c21955_719	3B	0	46	5	43	4.56E-17
RAC875_c2340_616	3B	0	46	6	42	2.47E-16
RAC875_c24982_583	3B	0	47	5	42	3.84E-17
RAC875_c25203_969	3B	0	43	12	39	4.04E-12
RAC875_c28384_413	3B	1	44	13	36	1.66E-11
RAC875_c33083_451	3B	0	42	9	43	4.49E-14
RAC875_c34484_67	3B	2	42	0	50	5.25E-21
RAC875_c3760_770	3B	7	44	1	42	8.85E-19
RAC875_c37608_216	3B	3	44	4	43	3.60E-17
RAC875_c3956_275	3B	1	43	14	36	8.06E-11
[truncated: 2,597 more rows]
