# Supplementary material for: Identification of quantitative trait loci of agronomic traits in bread wheat using a Pamyati Azieva × Paragon mapping population harvested in three regions of Kazakhstan
Source: PeerJ. 2022 Nov 9;10:e14324. doi: 10.7717/peerj.14324 (PMC9653069; doi:10.7717/peerj.14324)
Supplement: Supplemental Information 4 [file peerj-10-14324-s004.xlsx]

## Sheet: Лист1
Table S3.Three-way analysis of variance (ANOVA) for phenotypic traits of the Pamyati Azieva × Paragon
Heading date (HD, days)							h2
Factor	df	Sum Sq	Mean Sq	F-value	Pr(>F)
Genotype (G)	79	1108	14	3.828	< 2e-16	***	0.02
Region (R)	2	58257	29128	7951.19	< 2e-16	***
Year (Y)	1	1548	1548	422.573	< 2e-16	***
G:R	158	1168	7	2.017	5.49e-09	***
G:Y	79	404	5	1.396	0.0197	*
R:Y	2	828	414	113.02	< 2e-16	***
G:R:Y	158	741	5	1.28	0.0248	*
Residuals	480	1758	4
Seed maturation days (SMD, days)							h2
Factor	Df	Sum Sq	Mean Sq	F value	Pr(>F)
Genotype (G)	79	929	12	0.879	0.757		0.01
Region (R)	2	78928	39464	2949.95	<2e-16	***
Year (Y)	1	6291	6291	470.278	<2e-16	***
G:R	158	2185	14	1.034	0.391
G:Y	79	941	12	0.89	0.735
R:Y	2	1538	769	57.495	<2e-16	***
G:R:Y	158	2258	14	1.068	0.297
Residuals	480	6421	13
Plant height (PH, cm)							h2
Factor	df	Sum Sq	Mean Sq	F-value	Pr(>F)
Genotype (G)	79	26400	334	5.231	< 2e-16	***	0.1
Region (R)	2	216133	108067	1691.58	< 2e-16	***
Year (Y)	1	870	870	13.615	0.00025	***
G:R	158	12074	76	1.196	0.07749
G:Y	79	4256	54	0.843	0.82395
R:Y	2	5882	2941	46.035	< 2e-16	***
G:R:Y	158	10455	66	1.036	0.38465
Residuals	480	30665	64
Spike length (SL, cm)							h2
Factor	Df	Sum Sq	Mean Sq	F value	Pr(>F)
Genotype (G)	79	523.4	6.63	6.324	<2e-16	***	0.3
Region (R)	2	517.8	258.89	247.122	<2e-16	***
Year (Y)	1	24.3	24.26	23.16	2e-06	***
G:R	158	176.4	1.12	1.066	0.303
G:Y	79	82.5	1.04	0.997	0.492
R:Y	2	194.4	97.22	92.798	<2e-16	***
G:R:Y	158	205.8	1.3	1.243	0.042	*
Residuals	480	502.9	1.05
Number of productive spikes (NPS, pcs)							h2
Factor	Df	Sum Sq	Mean Sq	F value	Pr(>F)
Genotype (G)	79	66.7	0.84	1.481	0.007446	**	0.08
Region (R)	2	368.9	184.43	323.576	< 2e-16	***
Year (Y)	1	36	35.96	63.091	1.41e-14	***
G:R	158	134.3	0.85	1.491	0.000693	***
G:Y	79	53	0.67	1.178	0.155515
R:Y	2	94.6	47.29	82.963	< 2e-16	***
G:R:Y	158	112.2	0.71	1.246	0.040206	*
Residuals	480	273.6	0.57
Number of kernels per spike (NKS, pcs)							h2
Factor	Df	Sum Sq	Mean Sq	F value	Pr(>F)
Genotype (G)	79	9655	122	3.008	1.59e-13	***	0.13
Region (R)	2	36714	18357	451.8	< 2e-16	***
Year (Y)	1	920	920	22.654	2.57e-06	***
G:R	158	8701	55	1.355	0.00773	**
G:Y	79	3844	49	1.198	0.13287
R:Y	2	7681	3841	94.522	< 2e-16	***
G:R:Y	158	7981	51	1.243	0.04197	*
Residuals	480	19503	41
Thousand kernel weight (TKW, g)							h2
Factor	Df	Sum Sq	Mean Sq	F value	Pr(>F)
Genotype (G)	79	5141	65	4.507	<2e-16	***	0.14
Region (R)	2	1874	937	64.903	<2e-16	***
Year (Y)	1	11573	11573	801.563	<2e-16	***
G:R	158	2029	13	0.89	0.808
G:Y	79	1023	13	0.897	0.72
R:Y	2	14287	7144	494.765	<2e-16	***
G:R:Y	158	2042	13	0.895	0.795
Residuals	480	6930	14
