# Supplementary material for: Identification of quantitative trait loci of agronomic traits in bread wheat using a Pamyati Azieva × Paragon mapping population harvested in three regions of Kazakhstan
Source: PeerJ. 2022 Nov 9;10:e14324. doi: 10.7717/peerj.14324 (PMC9653069; doi:10.7717/peerj.14324)
Supplement: Supplemental Information 5 [file peerj-10-14324-s005.xlsx]

## Sheet: Petropavlovsk, North Kazakhstan
Table S4. Pearson's correlation index based on studies in three regions: 1) NKAES (Petropavlovsk); 2) RPCGF (Shortandy); and 3) KRIAPI (Almaty)
r	HT_18	SMD_18	PH_18	NPS_18	SL_18	NKS_18	TKW_18	YSM_18
HT_18	1.00000000	-0.25274591	0.39806648	-0.065065461	0.14458268	-0.063113564	-0.22663208	-0.21362037
SMD_18	-0.25274591	1.00000000	0.03016876	0.003675640	0.01680605	0.112093749	0.16088068	0.07938942
PH_18	0.39806648	0.03016876	1.00000000	-0.094934069	0.41035844	0.297727646	0.28949863	0.24374047
NPS_18	-0.06506546	0.00367564	-0.09493407	1.000000000	-0.09055439	-0.009046431	0.07352628	0.09130919
SL_18	0.14458268	0.01680605	0.41035844	-0.090554388	1.00000000	0.249056041	-0.01016301	0.08723821
NKS_18	-0.06311356	0.11209375	0.29772765	-0.009046431	0.24905604	1.000000000	0.02569570	0.43015828
TKW_18	-0.22663208	0.16088068	0.28949863	0.073526278	-0.01016301	0.025695697	1.00000000	0.40847522
YSM_18	-0.21362037	0.07938942	0.24374047	0.091309189	0.08723821	0.430158275	0.40847522	1.00000000
P-value	HT_18	SMD_18	PH_18	NPS_18	SL_18	NKS_18	TKW_18	YSM_18
HT_18	0.000000e+00	0.0150692	8.508315e-05	0.5377582	0.1691115508	5.500512e-01	2.982492e-02	4.089179e-02
SMD_18	1.506920e-02	0.0000000	7.752786e-01	0.9722603	0.8736647665	2.874093e-01	1.255193e-01	4.518986e-01
PH_18	8.508315e-05	0.7752786	0.000000e+00	0.3680346	0.0000485177	3.947501e-03	5.125950e-03	1.921462e-02
NPS_18	5.377582e-01	0.9722603	3.680346e-01	0.0000000	0.3906400940	9.317958e-01	4.860905e-01	3.866862e-01
SL_18	1.691116e-01	0.8736648	4.851770e-05	0.3906401	0.0000000000	1.666328e-02	9.234016e-01	4.082955e-01
NKS_18	5.500512e-01	0.2874093	3.947501e-03	0.9317958	0.0166632819	0.000000e+00	8.079010e-01	1.872508e-05
TKW_18	2.982492e-02	0.1255193	5.125950e-03	0.4860905	0.9234015990	8.079010e-01	0.000000e+00	5.295346e-05
YSM_18	4.089179e-02	0.4518986	1.921462e-02	0.3866862	0.4082955003	1.872508e-05	5.295346e-05	0.000000e+0
r	HT_19	SMD_19	PH_19	NPS_19	SL_19	NKS_19	TKW_19	YSM_19
HT_19	1.000000000	-0.07037507	0.249064895	0.182469911	0.05584424	-0.009430502	0.001121595	0.16903879
SMD_19	-0.070375066	1.00000000	-0.081410373	-0.097636434	0.11561570	-0.145837703	-0.110288005	0.10845302
PH_19	0.249064895	-0.08141037	1.000000000	-0.004288197	0.16969018	-0.082565831	0.376486624	0.12482303
NPS_19	0.182469911	-0.09763643	-0.004288197	1.000000000	-0.02008466	-0.028655889	-0.104935555	0.28972984
SL_19	0.055844242	0.11561570	0.169690180	-0.020084656	1.00000000	0.206041019	0.028062179	0.05960810
NKS_19	-0.009430502	-0.14583770	-0.082565831	-0.028655889	0.20604102	1.000000000	-0.361241694	0.25472434
TKW_19	0.001121595	-0.11028800	0.376486624	-0.104935555	0.02806218	-0.361241694	1.000000000	0.01362547
YSM_19	0.169038791	0.10845302	0.124823028	0.289729841	0.05960810	0.254724341	0.013625472	1.00000000
P-value	HT_19	SMD_19	PH_19	NPS_19	SL_19	NKS_19	TKW_19	YSM_19
HT_19	0.00000000	0.5221638	0.0215267184	0.094633807	0.6117117	0.9317371151	0.9918717004	0.121974775
SMD_19	0.52216380	0.0000000	0.4588850058	0.374023637	0.2920295	0.1829318990	0.3149838833	0.323152280
PH_19	0.02152672	0.4588850	0.0000000000	0.968930239	0.1205223	0.4525127761	0.0003834033	0.255024325
NPS_19	0.09463381	0.3740236	0.9689302394	0.000000000	0.8552311	0.7946046537	0.3391856429	0.007154305
SL_19	0.61171165	0.2920295	0.1205223016	0.855231124	0.0000000	0.0585134967	0.7987694490	0.587884084
NKS_19	0.93173712	0.1829319	0.4525127761	0.794604654	0.0585135	0.0000000000	0.0006821902	0.018641688
TKW_19	0.99187170	0.3149839	0.0003834033	0.339185643	0.7987694	0.0006821902	0.0000000000	0.901500250
YSM_19	0.12197478	0.3231523	0.2550243248	0.007154305	0.5878841	0.0186416880	0.9015002502	0.000000000
r	HT_AV	SMD_av	PH_AV	NPS_AV	SL_AV	NKS_AV	TKW_av	YSM_av
HT_AV	1.0000000000	-0.32499113	0.41984773	0.0006604008	0.19141119	0.03385492	0.09346405	0.1686936
SMD_av	-0.3249911311	1.00000000	-0.13454438	0.0266541257	-0.09543289	-0.17520425	-0.50408171	-0.2293224
PH_AV	0.4198477308	-0.13454438	1.00000000	-0.0333169117	0.37039582	0.17953957	0.38418045	0.2902348
NPS_AV	0.0006604008	0.02665413	-0.03331691	1.0000000000	-0.13673709	-0.09805741	-0.11896426	0.1574345
SL_AV	0.1914111945	-0.09543289	0.37039582	-0.1367370878	1.00000000	0.34098422	0.25498730	0.2528520
NKS_AV	0.0338549246	-0.17520425	0.17953957	-0.0980574060	0.34098422	1.00000000	0.03833235	0.3795527
TKW_av	0.0934640541	-0.50408171	0.38418045	-0.1189642626	0.25498730	0.03833235	1.00000000	0.3987727
YSM_av	0.1686936494	-0.22932240	0.29023484	0.1574345035	0.25285196	0.37955273	0.39877273	1.0000000
P-value	HT_AV	SMD_av	PH_AV	NPS_AV	SL_AV	NKS_AV	TKW_av	YSM_av
HT_AV	0.000000e+00	1.573076e-03	3.097173e-05	0.9950151	0.0675812266	0.7486825344	3.755311e-01	1.079507e-01
SMD_av	1.573076e-03	0.000000e+00	2.010089e-01	0.8008813	0.3655118162	0.0948261954	3.012084e-07	2.788491e-02
PH_AV	3.097173e-05	2.010089e-01	0.000000e+00	0.7525469	0.0002787388	0.0868077750	1.563779e-04	5.009057e-03
NPS_AV	9.950151e-01	8.008813e-01	7.525469e-01	0.0000000	0.1936976335	0.3524137659	2.586954e-01	1.339318e-01
SL_AV	6.758123e-02	3.655118e-01	2.787388e-04	0.1936976	0.0000000000	0.0008805028	1.416680e-02	1.502540e-02
NKS_AV	7.486825e-01	9.482620e-02	8.680778e-02	0.3524138	0.0008805028	0.0000000000	7.167713e-01	1.904105e-04
TKW_av	3.755311e-01	3.012084e-07	1.563779e-04	0.2586954	0.0141667966	0.7167712654	0.000000e+00	8.242977e-05
YSM_av	1.079507e-01	2.788491e-02	5.009057e-03	0.1339318	0.0150254029	0.0001904105	8.242977e-05	0.000000e+00

## Sheet: Shortandy, North Kazakhstan
Table S4. Pearson's correlation index based on studies in three regions: 1) NKAES (Petropavlovsk); 2) RPCGF (Shortandy); and 3) KRIAPI (Almaty)
r	HT_18	SMD_18	PH_18	NPS_18	SL_18	NKS_18	TKW_18	YSM_18
HT_18	1.00000000	-0.09417360	-0.13452390	-0.34847517	-0.04669476	-0.2826491	-0.43564016	-0.47133483
SMD_18	-0.09417360	1.00000000	0.03722449	0.17464740	0.04787316	-0.2085456	-0.25407143	-0.02837873
PH_18	-0.13452390	0.03722449	1.00000000	0.45409285	0.07203710	0.2542659	0.27202400	0.52558814
NPS_18	-0.34847517	0.17464740	0.45409285	1.00000000	0.04412876	0.1497066	0.26862209	0.81845985
SL_18	-0.04669476	0.04787316	0.07203710	0.04412876	1.00000000	0.4096882	0.06026486	0.17230266
NKS_18	-0.28264915	-0.20854556	0.25426589	0.14970656	0.40968822	1.0000000	0.39023017	0.47751545
TKW_18	-0.43564016	-0.25407143	0.27202400	0.26862209	0.06026486	0.3902302	1.00000000	0.63901654
YSM_18	-0.47133483	-0.02837873	0.52558814	0.81845985	0.17230266	0.4775155	0.63901654	1.00000000
P-value	HT_18	SMD_18	PH_18	NPS_18	SL_18	NKS_18	TKW_18	YSM_18
HT_18	0.000000e+00	0.36924306	1.985798e-01	6.191545e-04	0.6567098891	6.048916e-03	1.274663e-05	1.855356e-06
SMD_18	3.692431e-01	0.00000000	7.231532e-01	9.406098e-02	0.6486133189	4.485036e-02	1.399047e-02	7.871390e-01
PH_18	1.985798e-01	0.72315325	0.000000e+00	4.835981e-06	0.4925887022	1.391488e-02	8.345463e-03	6.317797e-08
NPS_18	6.191545e-04	0.09406098	4.835981e-06	0.000000e+00	0.6744770985	1.520645e-01	9.227734e-03	1.275654e-23
SL_18	6.567099e-01	0.64861332	4.925887e-01	6.744771e-01	0.0000000000	4.543260e-05	5.660794e-01	9.863034e-02
NKS_18	6.048916e-03	0.04485036	1.391488e-02	1.520645e-01	0.0000454326	0.000000e+00	1.102599e-04	1.299229e-06
TKW_18	1.274663e-05	0.01399047	8.345463e-03	9.227734e-03	0.5660794288	1.102599e-04	0.000000e+00	5.475220e-12
YSM_18	1.855356e-06	0.78713904	6.317797e-08	1.275654e-23	0.0986303419	1.299229e-06	5.475220e-12	0.000000e+00
r	HT_19	SMD_19	PH_19	NPS_19	SL_19	NKS_19	TKW_19	YSM_19
HT_19	1.000000000	0.064044957	-0.29479758	-0.03147951	-0.231822565	-0.001324794	-0.10531894	-0.2857307
SMD_19	0.064044957	1.000000000	-0.07613914	-0.07085211	-0.008825046	0.072752561	-0.05155451	-0.2765790
PH_19	-0.294797575	-0.076139142	1.00000000	0.06141667	0.354478005	0.090615771	0.31883505	0.4032890
NPS_19	-0.031479508	-0.070852106	0.06141667	1.00000000	0.260834461	0.362280703	0.16996183	0.1712212
SL_19	-0.231822565	-0.008825046	0.35447801	0.26083446	1.000000000	0.441093246	0.30502121	0.2536455
NKS_19	-0.001324794	0.072752561	0.09061577	0.36228070	0.441093246	1.000000000	0.12544238	0.2920979
TKW_19	-0.105318942	-0.051554509	0.31883505	0.16996183	0.305021212	0.125442381	1.00000000	0.4385113
YSM_19	-0.285730744	-0.276578958	0.40328897	0.17122121	0.253645480	0.292097897	0.43851135	1.0000000
P-value	HT_19	SMD_19	PH_19	NPS_19	SL_19	NKS_19	TKW_19	YSM_19
HT_19	0.000000000	0.539703874	0.0039226372	0.7632649000	2.456015e-02	9.898891e-01	3.123728e-01	5.244047e-03
PH_19	0.003922637	0.465769824	0.0000000000	0.5565020366	4.559922e-04	3.850734e-01	1.736027e-03	5.571120e-05
YSM_19	0.005244047	0.006965096	0.0000557112	0.0989328769	1.363404e-02	4.280943e-03	9.838798e-06	0.000000e+00
SL_19	0.024560147	0.932723455	0.0004559922	0.0111117519	0.000000e+00	8.597569e-06	2.796148e-03	1.363404e-02
TKW_19	0.312372821	0.621673433	0.0017360268	0.1014775858	2.796148e-03	2.283186e-01	0.000000e+00	9.838798e-06
SMD_19	0.539703874	0.000000000	0.4657698238	0.4973919579	9.327235e-01	4.858974e-01	6.216734e-01	6.965096e-03
NPS_19	0.763264900	0.497391958	0.5565020366	0.0000000000	1.111175e-02	3.330412e-04	1.014776e-01	9.893288e-02
NKS_19	0.989889079	0.485897436	0.3850734433	0.0003330412	8.597569e-06	0.000000e+00	2.283186e-01	4.280943e-03
r	HT_20	SMD_20	PH_20	NPS_20	SL_20	NKS_20	TKW_20	YSM_20
HT_20	1.00000000	0.030658892	0.2317226346	-0.051865901	0.262032877	0.24725878	-0.059631570	-0.2582637480
SMD_20	0.03065889	1.000000000	-0.0192489581	-0.218670708	-0.004773122	0.07222473	-0.122971164	-0.1786893388
PH_20	0.23172263	-0.019248958	1.0000000000	0.078084562	0.131684747	0.01235424	-0.024588753	-0.0006694472
NPS_20	-0.05186590	-0.218670708	0.0780845621	1.000000000	0.307954128	0.23648987	0.009408002	0.3540038358
SL_20	0.26203288	-0.004773122	0.1316847470	0.307954128	1.000000000	0.64310674	-0.014384366	-0.0214040351
NKS_20	0.24725878	0.072224734	0.0123542417	0.236489868	0.643106738	1.00000000	-0.202829353	0.0758628673
TKW_20	-0.05963157	-0.122971164	-0.0245887531	0.009408002	-0.014384366	-0.20282935	1.000000000	0.2781101448
YSM_20	-0.25826375	-0.178689339	-0.0006694472	0.354003836	-0.021404035	0.07586287	0.278110145	1.0000000000
P-value	HT_20	SMD_20	PH_20	NPS_20	SL_20	NKS_20	TKW_20	YSM_20
HT_20	0.00000000	0.77049042	0.02542115	0.6214866900	1.117187e-02	1.687334e-02	0.570174801	0.0124375965
SMD_20	0.77049042	0.00000000	0.85469085	0.0352199804	9.637821e-01	4.914595e-01	0.240268788	0.0865777024
PH_20	0.02542115	0.85469085	0.00000000	0.4568929110	2.083072e-01	9.064376e-01	0.815020959	0.9949186263
NPS_20	0.62148669	0.03521998	0.45689291	0.0000000000	2.673531e-03	2.247416e-02	0.928682659	0.0004992423
SL_20	0.01117187	0.96378209	0.20830723	0.0026735313	0.000000e+00	3.629440e-12	0.891150358	0.8386311806
NKS_20	0.01687334	0.49145953	0.90643760	0.0224741597	3.629440e-12	0.000000e+00	0.051190462	0.4698378914
TKW_20	0.57017480	0.24026879	0.81502096	0.9286826585	8.911504e-01	5.119046e-02	0.000000000	0.0069507713
YSM_20	0.01243760	0.08657770	0.99491863	0.0004992423	8.386312e-01	4.698379e-01	0.006950771	0.0000000000
r	HT_av	SMD_av	PH_av	NPS_av	SL_av	NKS_av	TKW_av	YSM_av
HT_av	1.00000000	-0.08888031	-0.012128368	0.093591863	-0.024390849	-0.112971338	-0.08254102	-0.2120979
SMD_av	-0.08888031	1.00000000	0.034128092	-0.228269774	0.057676665	0.038917308	-0.34444227	-0.2018620
PH_av	-0.01212837	0.03412809	1.000000000	-0.002127401	0.006350607	-0.005036926	0.19403235	0.3948073
NPS_av	0.09359186	-0.22826977	-0.002127401	1.000000000	0.139221670	0.124533466	0.01807576	0.1394738
SL_av	-0.02439085	0.05767667	0.006350607	0.139221670	1.000000000	0.328538883	0.05325109	0.1225810
NKS_av	-0.11297134	0.03891731	-0.005036926	0.124533466	0.328538883	1.000000000	0.05840547	0.3400883
TKW_av	-0.08254102	-0.34444227	0.194032348	0.018075759	0.053251095	0.058405475	1.00000000	0.5815784
YSM_av	-0.21209793	-0.20186199	0.394807332	0.139473762	0.122580972	0.340088313	0.58157843	1.0000000
P-value	HT_av	SMD_av	PH_av	NPS_av	SL_av	NKS_av	TKW_av	YSM_av
HT_av	0.00000000	0.3942782567	9.076368e-01	0.36959234	0.815490648	0.2783126191	4.289975e-01	4.014407e-02
SMD_av	0.39427826	0.0000000000	7.440067e-01	0.02690806	0.580829156	0.7095876506	6.751863e-04	5.104829e-02
PH_av	0.90763684	0.7440067085	0.000000e+00	0.98376420	0.951559745	0.9615714357	6.094507e-02	8.223089e-05
NPS_av	0.36959234	0.0269080647	9.837642e-01	0.00000000	0.180807970	0.2317341336	8.627141e-01	1.800118e-01
SL_av	0.81549065	0.5808291557	9.515597e-01	0.18080797	0.000000000	0.0012253159	6.102319e-01	2.391916e-01
NKS_av	0.27831262	0.7095876506	9.615714e-01	0.23173413	0.001225316	0.0000000000	5.760503e-01	7.973442e-04
TKW_av	0.42899751	0.0006751863	6.094507e-02	0.86271412	0.610231867	0.5760503490	0.000000e+00	7.907844e-10
YSM_av	0.04014407	0.0510482927	8.223089e-05	0.18001183	0.239191580	0.0007973442	7.907844e-10	0.000000e+00

## Sheet: Almaty, Southeast Kazakhstan
Table S4. Pearson's correlation index based on studies in three regions: 1) NKAES (Petropavlovsk); 2) RPCGF (Shortandy); and 3) KRIAPI (Almaty)
r	PH_15	NPS_15	SL_15	NKS_15	TKW_15
PH_15	1.00000000	0.07419597	0.37224327	0.46468614	0.21231429
NPS_15	0.07419597	1.00000000	0.15502440	0.18901210	-0.04387097
SL_15	0.37224327	0.15502440	1.00000000	0.46354283	0.02250091
NKS_15	0.46468614	0.18901210	0.46354283	1.00000000	-0.06436254
TKW_15	0.21231429	-0.04387097	0.02250091	-0.06436254	1.00000000
P-value	PH_15	NPS_15	SL_15	NKS_15	TKW_15
PH_15	0.000000e+00	0.48211675	2.583436e-04	3.066218e-06	0.0421708
NPS_15	4.821167e-01	0.00000000	1.400654e-01	7.116001e-02	0.6779646
SL_15	2.583436e-04	0.14006537	0.000000e+00	3.265996e-06	0.8314071
NKS_15	3.066218e-06	0.07116001	3.265996e-06	0.000000e+00	0.5421695
TKW_15	4.217080e-02	0.67796461	8.314071e-01	5.421695e-01	0.0000000
r	PH_16	NPS_16	SL_16	NKS_16	TKW_16
PH_16	1.0000000	0.15770816	0.43141758	0.32637255	0.30315516
NPS_16	0.1577082	1.00000000	-0.16643060	-0.09119699	-0.07549956
SL_16	0.4314176	-0.16643060	1.00000000	0.49571740	0.01928892
NKS_16	0.3263725	-0.09119699	0.49571740	1.00000000	-0.10716438
TKW_16	0.3031552	-0.07549956	0.01928892	-0.10716438	1.00000000
P-value	PH_16	NPS_16	SL_16	NKS_16	TKW_16
PH_16	0.000000e+00	0.1289902	1.417155e-05	1.325732e-03	0.002977023
NPS_16	1.289902e-01	0.0000000	1.088866e-01	3.820198e-01	0.469535824
SL_16	1.417155e-05	0.1088866	0.000000e+00	3.771534e-07	0.853599313
NKS_16	1.325732e-03	0.3820198	3.771534e-07	0.000000e+00	0.303921791
TKW_16	2.977023e-03	0.4695358	8.535993e-01	3.039218e-01	0.000000000
r	PH_17	NPS_17	SL_17	NKS_17	TKW_17
PH_17	1.0000000	0.13876468	0.23488702	0.2792699	0.42261993
NPS_17	0.1387647	1.00000000	0.09906576	0.1697600	-0.15920158
SL_17	0.2348870	0.09906576	1.00000000	0.1961591	-0.02579442
NKS_17	0.2792699	0.16975999	0.19615910	1.0000000	-0.19145193
TKW_17	0.4226199	-0.15920158	-0.02579442	-0.1914519	1.00000000
P-value	PH_17	NPS_17	SL_17	NKS_17	TKW_17
PH_17	0.000000e+00	0.1822578	0.02267744	0.006413532	2.203367e-05
NPS_17	1.822578e-01	0.0000000	0.34212932	0.101890138	1.253603e-01
SL_17	2.267744e-02	0.3421293	0.00000000	0.058113659	8.050777e-01
NKS_17	6.413532e-03	0.1018901	0.05811366	0.000000000	6.453031e-02
TKW_17	2.203367e-05	0.1253603	0.80507766	0.064530306	0.000000e+00
r	HT_18	SMD_18	PH_18	NPS_18	SL_18	NKS_18	TKW_18
HT_18	1.000000000	-0.36206898	0.112950955	-0.066445198	0.118187305	-0.08057348	-0.009655302
SMD_18	-0.362068982	1.00000000	0.022401691	-0.038976099	0.045663448	0.06199430	-0.184225786
PH_18	0.112950955	0.02240169	1.000000000	-0.001138674	0.551449909	0.27138929	0.280412744
NPS_18	-0.066445198	-0.03897610	-0.001138674	1.000000000	-0.008145979	0.03797235	0.043985970
SL_18	0.118187305	0.04566345	0.551449909	-0.008145979	1.000000000	0.57030569	0.015749498
NKS_18	-0.080573479	0.06199430	0.271389293	0.037972349	0.570305690	1.00000000	-0.028699524
TKW_18	-0.009655302	-0.18422579	0.280412744	0.043985970	0.015749498	-0.02869952	1.000000000
P-value	HT_18	SMD_18	PH_18	NPS_18	SL_18	NKS_18	TKW_18
HT_18	0.0000000000	0.0003359284	2.783999e-01	0.5245846	2.565772e-01	4.401186e-01	0.926411032
SMD_18	0.0003359284	0.0000000000	8.303027e-01	0.7091686	6.620910e-01	5.527889e-01	0.075488633
PH_18	0.2783999044	0.8303027424	0.000000e+00	0.9913095	8.406067e-09	8.148247e-03	0.006191232
NPS_18	0.5245845925	0.7091685683	9.913095e-01	0.0000000	9.378895e-01	7.163354e-01	0.673786022
SL_18	0.2565772153	0.6620910250	8.406067e-09	0.9378895	0.000000e+00	1.969053e-09	0.880241330
NKS_18	0.4401186029	0.5527888608	8.148247e-03	0.7163354	1.969053e-09	0.000000e+00	0.783634502
TKW_18	0.9264110322	0.0754886335	6.191232e-03	0.6737860	8.802413e-01	7.836345e-01	0.000000000
r	HT_19	SMD_19	PH_19	NPS_19	SL_19	NKS_19	TKW_19	YSM_19
HT_19	1.00000000	-0.361134952	0.105183887	0.01829727	0.02939921	0.06258680	-0.04375375	-0.06855949
SMD_19	-0.36113495	1.000000000	0.003935617	0.01670136	-0.07216236	-0.05587479	-0.04804336	0.04068251
PH_19	0.10518389	0.003935617	1.000000000	0.25693981	0.35721883	0.05588675	0.23608535	0.19150838
NPS_19	0.01829727	0.016701364	0.256939808	1.00000000	0.14331369	-0.15289453	-0.05420789	0.35854967
SL_19	0.02939921	-0.072162358	0.357218831	0.14331369	1.00000000	0.46895370	0.05272529	0.26991774
NKS_19	0.06258680	-0.055874790	0.055886747	-0.15289453	0.46895370	1.00000000	-0.07762346	0.49535160
TKW_19	-0.04375375	-0.048043364	0.236085354	-0.05420789	0.05272529	-0.07762346	1.00000000	0.02061519
YSM_19	-0.06855949	0.040682505	0.191508380	0.35854967	0.26991774	0.49535160	0.02061519	1.00000000
P-value	HT_19	SMD_19	PH_19	NPS_19	SL_19	NKS_19	TKW_19	YSM_19
HT_19	0.0000000000	0.0003489424	0.3129972168	0.8610484441	7.784934e-01	5.489925e-01	0.67541119	5.114456e-01
SMD_19	0.0003489424	0.0000000000	0.9699692757	0.8730620254	4.894520e-01	5.927217e-01	0.64563751	6.970429e-01
PH_19	0.3129972168	0.9699692757	0.0000000000	0.0124223368	4.087135e-04	5.926424e-01	0.02197552	6.445009e-02
NPS_19	0.8610484441	0.8730620254	0.0124223368	0.0000000000	1.681998e-01	1.412375e-01	0.60382017	3.874204e-04
SL_19	0.7784934032	0.4894519522	0.0004087135	0.1681997590	0.000000e+00	1.866817e-06	0.61376799	8.514431e-03
NKS_19	0.5489925125	0.5927217207	0.5926424426	0.1412374577	1.866817e-06	0.000000e+00	0.45709377	3.858463e-07
TKW_19	0.6754111889	0.6456375126	0.0219755183	0.6038201676	6.137680e-01	4.570938e-01	0.00000000	8.436567e-01
YSM_19	0.5114456427	0.6970429248	0.0644500868	0.0003874204	8.514431e-03	3.858463e-07	0.84365669	0.000000e+00
r	HT_20	SMD_20	PH_20	NPS_20	SL_20	NKS_20	TKW_20	YSM_20
HT_20	1.00000000	-0.82963672	-0.08905864	0.16160561	0.02506810	0.1751847	-0.25971604	0.01251345
SMD_20	-0.82963672	1.00000000	-0.05456140	-0.11291536	0.01598336	-0.0830991	0.07947276	0.03784945
PH_20	-0.08905864	-0.05456140	1.00000000	-0.01876603	0.50086882	0.1928929	0.24540394	0.27400287
NPS_20	0.16160561	-0.11291536	-0.01876603	1.00000000	0.03555952	0.1065722	0.17509176	0.45223647
SL_20	0.02506810	0.01598336	0.50086882	0.03555952	1.00000000	0.5197224	0.07278534	0.34560016
NKS_20	0.17518471	-0.08309910	0.19289290	0.10657215	0.51972236	1.0000000	-0.07895600	0.48781903
TKW_20	-0.25971604	0.07947276	0.24540394	0.17509176	0.07278534	-0.0789560	1.00000000	0.27865570
YSM_20	0.01251345	0.03784945	0.27400287	0.45223647	0.34560016	0.4878190	0.27865570	1.00000000
P-value	HT_20	SMD_20	PH_20	NPS_20	SL_20	NKS_20	TKW_20	YSM_20
HT_20	0.000000e+00	5.128489e-25	3.933264e-01	1.196824e-01	8.104620e-01	9.125006e-02	0.011475142	9.047178e-01
SMD_20	5.128489e-25	0.000000e+00	6.014588e-01	2.785524e-01	8.784766e-01	4.258726e-01	0.446410445	7.172146e-01
PH_20	3.933264e-01	6.014588e-01	0.000000e+00	8.575256e-01	2.728495e-07	6.250768e-02	0.017124552	7.531949e-03
NPS_20	1.196824e-01	2.785524e-01	8.575256e-01	0.000000e+00	7.336629e-01	3.066174e-01	0.091424660	4.743113e-06
SL_20	8.104620e-01	8.784766e-01	2.728495e-07	7.336629e-01	0.000000e+00	7.965071e-08	0.485700400	6.457160e-04
NKS_20	9.125006e-02	4.258726e-01	6.250768e-02	3.066174e-01	7.965071e-08	0.000000e+00	0.449381567	6.132848e-07
TKW_20	1.147514e-02	4.464104e-01	1.712455e-02	9.142466e-02	4.857004e-01	4.493816e-01	0.000000000	6.535905e-03
YSM_20	9.047178e-01	7.172146e-01	7.531949e-03	4.743113e-06	6.457160e-04	6.132848e-07	0.006535905	0.000000e+00
r	HT_av	SMD_av	PH_av	NPS_AV	SL_AV	NKS_AV	TKW_av	YSM_av
HT_av	1.000000000	-0.475410819	0.04692041	-0.055893180	0.078306484	0.07135028	-0.085560940	0.004109624
SMD_av	-0.475410819	1.000000000	0.02323988	-0.007652718	-0.065474920	0.01670948	-0.094086124	-0.010470920
PH_av	0.046920406	0.023239875	1.00000000	0.084809398	0.515300626	0.33121283	0.379309401	0.218492750
NPS_AV	-0.055893180	-0.007652718	0.08480940	1.000000000	-0.055970406	0.13007210	-0.059402993	0.389828782
SL_AV	0.078306484	-0.065474920	0.51530063	-0.055970406	1.000000000	0.47011248	-0.002031459	0.099498497
NKS_AV	0.071350279	0.016709483	0.33121283	0.130072103	0.470112481	1.00000000	-0.155478920	0.451062687
TKW_av	-0.085560940	-0.094086124	0.37930940	-0.059402993	-0.002031459	-0.15547892	1.000000000	0.107302029
YSM_av	0.004109624	-0.010470920	0.21849275	0.389828782	0.099498497	0.45106269	0.107302029	1.000000000
P-value	HT_av	SMD_av	PH_av	NPS_AV	SL_AV	NKS_AV	TKW_av	YSM_av
HT_av	0.000000e+00	1.284902e-06	6.533804e-01	0.5925997945	4.531316e-01	4.943652e-01	0.4122446523	9.686422e-01
SMD_av	1.284902e-06	0.000000e+00	8.240537e-01	0.9416436449	5.306707e-01	8.730008e-01	0.3670586448	9.202143e-01
PH_av	6.533804e-01	8.240537e-01	0.000000e+00	0.4163777345	1.070320e-07	1.110917e-03	0.0001630835	3.437409e-02
NPS_AV	5.925998e-01	9.416436e-01	4.163777e-01	0.0000000000	5.920879e-01	2.114682e-01	0.5695393669	1.028437e-04
SL_AV	4.531316e-01	5.306707e-01	1.070320e-07	0.5920878987	0.000000e+00	1.746752e-06	0.9844963099	3.400144e-01
NKS_AV	4.943652e-01	8.730008e-01	1.110917e-03	0.2114681707	1.746752e-06	0.000000e+00	0.1345570987	5.054788e-06
TKW_av	4.122447e-01	3.670586e-01	1.630835e-04	0.5695393669	9.844963e-01	1.345571e-01	0.0000000000	3.032975e-01
YSM_av	9.686422e-01	9.202143e-01	3.437409e-02	0.0001028437	3.400144e-01	5.054788e-06	0.3032975070	0.000000e+00
