# Supplementary material for: Identification of quantitative trait loci of agronomic traits in bread wheat using a Pamyati Azieva × Paragon mapping population harvested in three regions of Kazakhstan
Source: PeerJ. 2022 Nov 9;10:e14324. doi: 10.7717/peerj.14324 (PMC9653069; doi:10.7717/peerj.14324)
Supplement: Supplemental Information 6 [file peerj-10-14324-s006.xlsx]

## Sheet: Table S5
Table S5. List of 53 stable QTLs identified in the Pamyati Azieva x Paragon mapping population
№	Trait	QTLs	Marker Interval	Position, cM	marker peak	Peak, cM	Chr	max. LOD	max. R2, %	Add. Effect	Allele	KRIAPI (Almaty)											RPCGF (Shortandy)				NKAES (Petropavlovsk)							reference genome, bp	Genes	Protein
												2015	2016			2017	2018			2019	2020	average	2018	2019	2020	average	2018			2019			average
													1	2	average		1	2	average								1	2	average	1	2	average
1	heading date	Qhd-PAxP.ipbb-2A	CAP11_c2293_200 -RAC875_rep_c107961_348	42,6-110,4	BS00096882_51	91.2	2A	4.8	15	-0.61	Paragon	NA	NA	NA	NA	NA		4.8													3.4	3.9	4.3	700955008-700955108	TraesCS2A02G451300
2	heading date	Qhd-PAxP.ipbb-7A	RAC875_c66770_208 - BS00074230_51	17,2-56,5	RAC875_c63889_486	43.2	7A	8.1	26	-0.9	Paragon	NA	NA	NA	NA	NA					3.1				8.1		5.3	5.3	7.6		5.6	7.3	5.6	53628481-53628625	TraesCS7A02G088600	Coatomer subunit beta (Triticum aestivum)
3	heading date	Qhd-PAxP.ipbb-7B	BobWhite_c47269_128 - RAC875_c46751_112	9,8-36,5	Ex_c101666_634	32	7B	8.1	25	0.72	Pam Az	NA	NA	NA	NA	NA	4.7		3.7										4.5	6.9	5.9	8.1	8.3	11962550-11962650	TraesCS7B02G014800
4	heading date	Qhd-PAxP.ipbb-7D	wsnp_Ku_c27286_37236472-Ku_c32426_324	61,3-85,0	BS00066128_51	76.4	7D	3	14	1.64	Pam Az	NA	NA	NA	NA	NA							3			3								527733311-527733411
5	seed maturation date	Qsmd-PAxP.ipbb-1A	Excalibur_c97157_65-BS00056823_51	75,5-93,0	IAAV6100	92.2	1A	4.2	17	-1.41	Paragon	NA	NA	NA	NA	NA							3.1								3.2	4.2		582865290-582865425	TraesCS1A02G430400	H3K4-specific demethylase, JmjC domain-containing protein, Control of stem elongation, Control of transposon activity, Panicle development (Triticum aestivum)
6	seed maturation date	Qsmd-PAxP.ipbb-5D	BS00064691_51-BS00025017_51	56,2-99,9	BS00064359_51	67.1	5D	3.5	16	0.49	Pam Az	NA	NA	NA	NA	NA						3.5	3.3											510388355-510388454	TraesCS5D02G469200	F-box protein (Triticum turgidum)
7	seed maturation date	Qsmd-PAxP.ipbb-6A	Excalibur_c20597_569-BobWhite_c18721_190	6,5-35,4	BS00035056_51	24.4	6A	4.2	16	0.61	Pam Az	NA	NA	NA	NA	NA												3.7	4.2					13383113-13383213	TraesCS6A02G026600	Protein KINESIN LIGHT CHAIN-RELATED 1 (Triticum aestivum)
8	plant height	Qph-PAxP.ipbb-2B.1	RAC875_c17720_436-Excalibur_c2484_1329	63,7-103,6	RAC875_s109189_188	80.5	2B	5.4	17	-3,04	Paragon	4.5	4.4																	3.2	5.4	4.2		248149771-248149825	TraesCS2B02G244300	Tyrosyl-DNA phosphodiesterase 1 (Triticum aestivum)
9	plant height	Qph-PAxP.ipbb-2B.2	Ra_c111671_555 - Kukri_c34553_89	85,5-110,3	wsnp_JD_rep_c67103_42432235	92.5	2B	7.2	22	-4.56	Paragon			6.9	5.8			7.2										6.4	5.3					578601322-578601519	TraesCS2B02G407500	Sphingoid long-chain bases kinase 1 (Aegilops tauschii)
10	plant height	Qph-PAxP.ipbb-2B.3	Ex_c55735_1012 -Tdurum_contig12159_468	93,5-112,7	IAAV283	106	2B	6.1	18	-3,6	Paragon					4.7	3.2		6.1		3.9	3.7												753801797-753801919	TraesCS2B02G560200
11	plant height	Qph-PAxP.ipbb-5A.1	D_contig23076_255-IAAV2328	67,3-91,2	wsnp_Ku_c15816_24541162	79.4	5A	7.4	22	3.63	Pam Az	5.5										7.4												502799550-502799750	TraesCS5A02G293000	ADP-ribosylation factor GTPase-activating protein AGD3 (Aegilops tauschii)
12	plant height	Qph-PAxP.ipbb-5A.2	wsnp_Ex_c27298_36506245-Tdurum_contig82190_124	80,9-108,1	Kukri_rep_c70839_205	95.6	5A	7.7	24	3.99	Pam Az		4.2		4.8		6.1		7		7.7													563843071-563843169	TraesCS5A02G363200	Fatty acyl-CoA reductase (Triticum aestivum)
13	plant height	Qph-PAxP.ipbb-6A	BobWhite_c4872_97 - IAAV4068	53,2-69,0	Kukri_c33967_97	61.6	6A	7.8	18	3.19	Pam Az				3.6						3.6	3.4					5.6	5.9	7.8					356201678-356201732	TraesCS6A02G204400
14	plant height	Qph-PAxP.ipbb-7A	RAC875_c63889_486 - JD_c19177_1284	43,3-63,8	BS00010282_51	52.2	7A	8.2	19	-3.57	Paragon																8.2		6.9					70049881-70049981
15	plant height	Qph-PAxP.ipbb-7B	BobWhite_c47269_128-wsnp_Ku_c11060_18147688	10,1-45,9	BobWhite_c44404_312	28.6	7B	4.3	12	2.84	Pam Az				3.9							4.3					3.6	3	3.8					17656855-17656955	TraesCS7B02G020100	TOM1-like protein 2 (Aegilops tauschii)
16	spike length	Qsl-PAxP.ipbb-4A	wsnp_Ex_c22913_32130617 - BS00041735_51	26,6-45,3	wsnp_Ex_c55245_57821568	35.3	4A	10.9	18	-0.56	Paragon	3.5	3.4	5.1	5.9	3.7			4.9	6.3	4.7	10.9	5.1			4								40879450-40879613	TraesCS4A02G050200	Protein RBL (Triticum aestivum)
17	spike length	Qsl-PAxP.ipbb-4B	Tdurum_contig61242_161 -BS00062304_51	69,9-102,4	Kukri_c93922_206	85	4B	4.7	17	0.38	Pam Az													4.7						3.2		3.6		653011438-653011493	TraesCS4B02G364900	BHLH domain-containing protein (Triticum aestivum)
18	spike length	Qsl-PAxP.ipbb-5A.1	BobWhite_rep_c50145_387 -BS00005311_51	35,3-59,6	wsnp_Ex_c15046_23216392	40.8	5A	4.6	13	-0.37	Paragon														4.2		4.6	4.3						36319084-36319284
19	spike length	Qsl-PAxP.ipbb-5A.2	wsnp_Ex_c27298_36506245 - IACX3911	80,5-93,4	BS00083514_51	86	5A	6.5	21	0.65	Pam Az						4.3		6.5		4.2	3.1												546531010-546531110	TraesCS5A02G338800	Serine/threonine-protein kinase HT1 (Aegilops tauschii)
20	spike length	Qsl-PAxP.ipbb-5B	Ex_c23426_1546 -Ex_c24477_484	38,1-71,3	Ku_c13342_414	49.4	5B	7.9	26	0.43	Pam Az						4.4													7.8		7.9		436216343-436216398	TraesCS5B02G253500	F-box domain-containing protein (Triticum aestivum)
21	spike length	Qsl-PAxP.ipbb-7D	wsnp_Ku_c27286_37236472 -TA005107-0866	11,8-69,1	wsnp_Ku_c27286_37236472	62.2	7D	4.9	30	-0.75	Paragon		3.2					3.4	4.9							3.2								112790147-112790347	TraesCS7D02G162800	Pentatricopeptide repeat-containing protein At3g18110, chloroplastic (Triticum aestivum)
22	number of productive spike per plant	Qnps-PAxP.ipbb-1A.1	RFL_Contig854_2201-Kukri_c7436_2259	0,0-35,0	Tdurum_contig29484_628	17	1A	3	11	-0.15	Paragon										3					3								15437135-15437197	TraesCS1A02G033000	WD_REPEATS_REGION domain-containing protein (Aegilops tauschii)
23	number of productive spike per plant	Qnps-PAxP.ipbb-1A.2	BS00039378_51 - RAC875_c62550_470	61,3-93,0	Kukri_c45512_193	70	1A	3.4	13	0,44//-0,27	Paragon//Pam Az	3.4								3.1									3.2					533902101-533902156
24	number of productive spike per plant	Qnps-PAxP.ipbb-2D	D_contig31797_313 - Excalibur_c16329_493	71,4-120,5	TA001366-0072	78.6	2D	3.3	10	0.14	Pam Az																	3	3.3					81312847-81312901	TraesCS2D02G138200	Genome assembly, chromosome: II (Triticum aestivum)
25	number of productive spike per plant	Qnps-PAxP.ipbb-5A.4	Kukri_c6266_260 - TA003720-0955	135,1-156,6	wsnp_Ex_c31672_40435001	144.5	5A	4.4	14	-0.22	Paragon																	4.4	4					631668359-631668559	TraesCS5A02G449900
26	number of productive spike per plant	Qnps-PAxP.ipbb-5A.1	RAC875_c68530_59 - wsnp_JD_c8448_9444839	16,5-43,4	BS00079189_51	27.2	5A	3	11	0.2	Pam Az												3					3						15851069-15851169
27	number of productive spike per plant	Qnps-PAxP.ipbb-5A.2	wsnp_Ex_c15046_23216392 - BS00022110_51	40,9-54,0	TA001494-0485	49.3	5A	5.6	19	-0,78//0,54	Paragon//Pam Az		3.9						5.6															408458545-408458600	TraesCS5A02G201900
28	number of productive spike per plant	Qnps-PAxP.ipbb-5A.3	BS00083514_51 - Excalibur_c8030_2139	86,8-102,2	IACX3911	93.4	5A	4.7	15	0.23	Pam Az																	4.7	3.3					561173977-561174040	TraesCS5A02G359100
29	number of kernels per spike	Qnks-PAxP.ipbb-2D.1	wsnp_Ex_rep_c80588_75758453 - wsnp_Ex_c7908_13430703	0,0-9,8	TA001604-0648	6.1	2D	6.4	21	-3.5	Paragon								6.4	4.5														12786030-12786130	TraesCS2D02G032700	Genome assembly, chromosome: II (Triticum aestivum)
30	number of kernels per spike	Qnks-PAxP.ipbb-2D.2	Excalibur_c6681_580- BS00067927_51	140,5-157,0	D_contig14237_449	156.4	2D	6.9	21	-2.27	Paragon	3.3			3.2							6.9												611222031-611227269	TraesCS2D02G522600	4-hydroxy-7-methoxy-3-oxo-3,4-dihydro-2H-1,4-benzoxazin-2-yl glucosidebeta-D-glucosidase (Aegilops tauschii)
31	number of kernels per spike	Qnks-PAxP.ipbb-3B.4	BS00102641_51 - wsnp_CAP12_c2297_1121142	113,8-156,0	CAP12_c3551_85	127.4	3B	5.1	18	2.31	Pam Az																	3.3			5.1			742106703-742106799
32	number of kernels per spike	Qnks-PAxP.ipbb-3B.1	wsnp_Ex_c40595_47620787 -RFL_Contig5709_3005	12,4-25,6	Ra_c17608_960	19.7	3B	5.7	20	2.96	Pam Az					5.7				3.1														35424126-35424226
33	number of kernels per spike	Qnks-PAxP.ipbb-3B.2	Tdurum_contig79629_538 -Excalibur_c25566_1000	29,4-41,0	BS00018764_51	36.2	3B	5.8	16	3.57	Pam Az			5.8	3.1																			16455366-16455466	TraesCS3B02G034500	UBC core domain-containing protein (Triticum aestivum)
34	number of kernels per spike	Qnks-PAxP.ipbb-3B.3	BS00011596_51-RAC875_c10628_1253	48,8-79,4	RFL_Contig29_1062	61.6	3B	4.6	15	4.11	Pam Az		4.6									3												40908555-40908610	TraesCS3B02G068900	MYB-related transcription factor (Triticum turgidum)
35	number of kernels per spike	Qnks-PAxP.ipbb-4B	IAAV8848 -BS00062304_51	84,2-102,0	Kukri_rep_c101259_81	92.5	4B	6.7	23	2.13	Pam Az																	4.2	6.7					657274157-657274231
36	number of kernels per spike	Qnks-PAxP.ipbb-5A	D_contig23076_255-IACX3911	69,9-93,0	BS00083514_51	87.5	5A	4.1	14	3.03	Pam Az						4.1				3.5													546531010-546531110	TraesCS5A02G338800	Serine/threonine-protein kinase HT1 (Aegilops tauschii)
37	number of kernels per spike	Qnks-PAxP.ipbb-6B	Tdurum_contig74813_560 -wsnp_Ex_rep_c102186_87408828	0,0-16,8	CAP11_c7959_386	7.2	6B	4.3	15	-2.26	Paragon																3			4.3				15129407-15134280	TraesCS6B02G024900	Nitrate reductase (Triticum aestivum)
38	number of kernels per spike	Qnks-PAxP.ipbb-6D	wsnp_Ex_c18664_27540364-RAC875_c25839_225	0,0-62,1	wsnp_Ku_c19587_29102203	9.7	6D	5.6	40	-5.22	Paragon										5.6		3.1											2167895-2168095	TraesCS6D02G004500
39	number of kernels per spike	Qnks-PAxP.ipbb-7A	RAC875_c20121_561-BS00022169_51	99,1-128,2	IAAV6957	111.6	7A	3.3	11	1.63	Pam Az			5.1								3.3												675231732-675231798	TraesCS7A02G483700	PA domain-containing protein (Aegilops tauschii)
40	thousand kernal/grain weight	Qtkw-PAxP.ipbb-1A	BobWhite_c13761_242-RAC875_c62550_470	74,3-93,0	BS00023114_51	87.2	1A	4	12	0.82	Pam Az						3.3			4		3.1												577079070-577079170	TraesCS1A02G420600
41	thousand kernal/grain weight	Qtkw-PAxP.ipbb-2B.1	IACX6239 - Tdurum_contig30930_184	71,3-89,3	BS00041323_51	75.7	2B	3.9	17	3,85/-1,02	Paragon//Pam Az								3.9								3							180543392-180543492	TraesCS2B02G201100	Mitochondrial import inner membrane translocase subunit Tim17 (Aegilops tauschii )
42	thousand kernal/grain weight	Qtkw-PAxP.ipbb-2B.2	Tdurum_contig91519_224 -Tdurum_contig10108_246	82,1-104,4	CAP12_c2472_60	94	2B	9.9	34	-2.16	Paragon													5		3.1				9.9		4.2		611282847- 611284978	TraesCS2B02G425600	Plasma membrane intrinsic protein (Triticum aestivum)
43	thousand kernal/grain weight	Qtkw-PAxP.ipbb-4B.1	RFL_Contig4881_137-Kukri_c93922_206	54,2-85,8	RAC875_c14085_1709	68.9	4B	3.8	14	-0,96	Paragon	3									3.1	3.8												612759602-612759649	TraesCS4B02G321800	Calcium-dependent protein kinase, isoform 11 (EC 2.7.1.-) (CDPK 11) (Triticum aestivum)
44	thousand kernal/grain weight	Qtkw-PAxP.ipbb-4B.2	Tdurum_contig61242_161 -BS00062304_51	70,5-102,0	Kukri_c93922_206	86.3	4B	3.6	12	1,5//-0,25	Paragon//Pam Az													3.6				3.2						653011438-653011493	TraesCS4B02G364900	BHLH domain-containing protein (Triticum aestivum)
45	thousand kernal/grain weight	Qtkw-PAxP.ipbb-6A	Tdurum_contig76709_195 - RFL_Contig5314_1147	62,3-77,6	IAAV4068	68.3	6A	5.9	15	1.92	Pam Az							5.9												5.2	4.2	5.4		565468226-565468336	TraesCS6A02G334900	Kinesin-like protein( Aegilops tauschii)
46	yield per square meter	QYM2-PAxP.ipbb-2A	Tdurum_contig42153_7329 -wsnp_Ex_c5412_9564478	35,1-48,3	CAP11_c2293_200	42.3	2A	4.8	14	-17	Paragon	NA	NA	NA	NA	NA	NA	NA	NA								4.8		3.6					30147904 - 30153701	TraesCS2A02G067800	Glucose-6-phosphate 1-dehydrogenase (Triticum aestivum)
47	yield per square meter	QYM2-PAxP.ipbb-2D.1	wsnp_Ex_rep_c80588_75758453-JD_c63957_1176	0,0-16,5	TA010191-1338	3.9	2D	3.8	22	36.7	Pam Az	NA	NA	NA	NA	NA	NA	NA	NA							3.8			3.7					11477021-11477121	TraesCS2D02G027700	Chalcone synthase (Triticum turgidum)
48	yield per square meter	QYM2-PAxP.ipbb-2D.2	RFL_Contig2656_871 -BS00067927_51	149,2-157,0	D_contig14237_449	156.7	2D	7.2	21	-17.3	Paragon	NA	NA	NA	NA	NA	NA	NA	NA									6	7.2				4	611223072- 611227269	TraesCS2D02G522600	4-hydroxy-7-methoxy-3-oxo-3,4-dihydro-2H-1,4-benzoxazin-2-yl glucosidebeta-D-glucosidase (Aegilops tauschii)
49	yield per square meter	QYM2-PAxP.ipbb-3A	BS00021976_51-Excalibur_c39248_485	66,0-94,0	Ku_c19285_555	80.1	3A	3.5	12	-60.9	Paragon										3.2	3.5												512032474-512032574
50	yield per square meter	QYM2-PAxP.ipbb-4A	Tdurum_contig21233_82 - Ra_c7973_1185	0,0-36,4	Ra_c74035_586	24.3	4A	3.3	10	-57	Paragon	NA	NA	NA	NA	NA	NA	NA	NA				3.3										3.2	16967952-16968052	TraesCS4A02G023700	GTD-binding domain-containing protein (Aegilops tauschii)
51	yield per square meter	QYM2-PAxP.ipbb-5A.1	Kukri_rep_c69378_1842-BS00100185_51	0,0-27,6	IAAV2776	18.4	5A	4.5	18	33.4	Pam Az	NA	NA	NA	NA	NA	NA	NA	NA		3.2	3.2								4.5				6707673-6707780	TraesCS5A02G010200	SacI homology domain-containing protein / WW domain-containing protein (Triticum aestivum)
52	yield per square meter	QYM2-PAxP.ipbb-5A.2	BS00079189_51-BS00066499_51	27,6-47,4	Excalibur_rep_c90275_262	36.4	5A	4	13	-32,4//61,8	Paragon//Pam Az	NA	NA	NA	NA	NA	NA	NA	NA				3.8							4				29514306-29514406	TraesCS5A02G031900
53	yield per square meter	QYM2-PAxP.ipbb-7B	IAAV1902-wsnp_Ex_c2103_3947695	8,5-33,1	BS00081132_51	23.1	7B	3.3	12	22.8	Pam Az	NA	NA	NA	NA	NA	NA	NA	NA										3.3		3.3			11962550-11962650	TraesCS7B02G014800
