# Supplementary material for: Identification of quantitative trait loci of agronomic traits in bread wheat using a Pamyati Azieva × Paragon mapping population harvested in three regions of Kazakhstan
Source: PeerJ. 2022 Nov 9;10:e14324. doi: 10.7717/peerj.14324 (PMC9653069; doi:10.7717/peerj.14324)
Supplement: Supplemental Information 7 [file peerj-10-14324-s007.xlsx]

## Sheet: Table S6 
Table S6. List of identified QTLs based on field trials of the Pamyati Azieva x Paragon mapping population and comparative analyses with the associations revealed in previously published reports
№	QTL	Chr	Position, cM	max. LOD	max. R2, %	Position	References
						cM, markers, region
1.	Qhd-PAxP.ipbb-2A	2A	42.6-110.4	4.8	15	43.5-46.5	Hu et al. 2020 (RILs)
						104.6	Chen et al. 2020 (RILs)
2.	Qhd-PAxP.ipbb-7A	7A	17.2-56.5	8.1	26	50.4-54.4	Hu et al. 2020 (RILs)
3.	Qhd-PAxP.ipbb-7B	7B	9.8-36.5	8.1	25	23.5-26.5	Hu et al. 2020 (RILs)
4.	Qph-PAxP.ipbb-2B.1	2B	63.7-103.6	5.4	17	72.6	El-Feki et al. 2018 (DH)
						58.1-62.5	Börner et al. 2002 (RILs)
5.	Qph-PAxP.ipbb-2B.2	2B	85.5-110.3	7.2	22	93.9	Tahmasebi et al. 2017 (RILs)
						Kukri_c34553_89	Muhammad et al. 2021 (GWAS)
6.	Qph-PAxP.ipbb-5A.1	5A	67.3-91.2	7.4	22	50.5-81.5	Amalova et al. 2021a (DH)
						60.4	Griffiths et al. 2012 (DH)
						73	Tahmasebi et al. 2017 (RILs)
7.	Qph-PAxP.ipbb-5A.2	5A	80.9-108.1	7.7	24	80.1-110.0	Abugalieva. 2007 (DH)
						87	Ma et al. 2015 (DH)
8.	Qph-PAxP.ipbb-6A	6A	53.2-69.0	7.8	18	61.0-71.0	El-Feki et al. 2018 (DH)
						66.0-66.57	Ren et al. 2021 (RILs)
9.	Qph-PAxP.ipbb-7B	7B	10.1-45.9	4.3	12	29.7-44.1	El-Feki et al. 2018 (DH)
10.	Qsl-PAxP.ipbb-4A	4A	26.6-45.3	10.9	18	24.2-34.5	Börner et al. 2002 (RILs)
						31.5-37.5	Hu et al. 2020 (RILs)
11.	Qsl-PAxP.ipbb-5A.1	5A	35.3-59.6	4.6	13	35.3-63.5	Amalova et al. 2021a (DH)
						43.2-50.4	Börner et al. 2002 (RILs)
12.	Qsl-PAxP.ipbb-5A.2	5A	80.5-93.4	6.5	21	91.6-123.7	Amalova et al. 2021a (DH)
						82.0-100.8	Abugalieva. 2007 (DH)
						84.2	Onyemaobi et al. 2018 (RILs)
13.	Qsl-PAxP.ipbb-7D	7D	11.8-69.1	4.9	30	39.6	Ma et al.,2014 (DH)
14.	Qnps-PAxP.ipbb-1A.1	1A	0.0-35.0	3	11	39.2-55.4	Amalova et al. 2021a (DH)
						30	Quarrie et al. 2005
15.	Qnps-PAxP.ipbb-1A.2	1A	61.3-93.0	3.4	13	78.56	Turuspekov et al. 2017(GWAS)
16.	Qnps-PAxP.ipbb-5A.3	5A	86.8-102.2	4.7	15	98.1-105.7	Amalova et al. 2021a (DH)
						107.6-108.7	Quarrie et al. 2005
						98.9	Amalova et al. 2021b (GWAS)
17.	Qnks-PAxP.ipbb-2D.1	2D	0.0-9.8	6.4	21	11.8-20.6	Amalova et al. 2021a (DH)
						0.0-38.0	Börner et al. 2002 (RILs)
18.	Qnks-PAxP.ipbb-5A	5A	69.9-93.0	4.1	14	77.7-84.2	Onyemaobi et al. 2018 (RILs)
						84.1	Shi et al. 2017 (GWAS)
19.	Qnks-PAxP.ipbb-7A	7A	99.1-128.2	3.3	11	114.9	Gahlaut et al. 2021 (GWAS)
20.	Qtkw-PAxP.ipbb-2B.1	2B	71.3-89.3	3.9	17	78.2-78.8	Tura et al. 2020 (DH)
21.	Qtkw-PAxP.ipbb-4B.1	4B	54.2-85.8	3.8	14	45.5-72.7	Tura et al. 2020 (DH)
22.	Qtkw-PAxP.ipbb-4B.2	4B	70.5-102.0	3.6	12	77.9	Amalova et al. 2021b (GWAS)
23.	Qtkw-PAxP.ipbb-6A	6A	62.3-77.6	5.9	15	51.3-64.3	Amalova et al. 2021a (DH)
						58.2-66.1	Tura et al. 2020 (DH)
						65	Ma et al. 2015 (DH)
						63	Tahmasebi et al. 2017 (RILs)
						78	Sukumaran et al. 2015 (GWAS)
24.	QYM2-PAxP.ipbb-5A.1	5A	0.0-27.6	4.5	18	6	Tahmasebi et al. 2017 (RILs)
25.	QYM2-PAxP.ipbb-5A.2	5A	27.6-47.4	4	13	32.33	Wang et al. 2017 (GWAS)
