# Supplementary material for: Identification of quantitative trait loci of agronomic traits in bread wheat using a Pamyati Azieva × Paragon mapping population harvested in three regions of Kazakhstan
Source: PeerJ. 2022 Nov 9;10:e14324. doi: 10.7717/peerj.14324 (PMC9653069; doi:10.7717/peerj.14324)
Supplement: Supplemental Information 8 [file peerj-10-14324-s008.xlsx]

## Sheet: Table S7
Table S7. Evaluation of two RILs of mapping population Pamyati Azieva x Paragon (PAxP) in multiple tested environments
Traits	Region	PAxP-01	PAxP-05			QTLs	SNP ID	Chromosome	Position, cM	Alleles	PAxP-01	PAxP-05
HD, days	NKAES (Petropavlovsk)	41.8333	45.1667			Qhd-PAxP.ipbb-2A	BS00096882_51	2A	91.3847	Paragon	A	B
	RPCGF (Shortandy)	44.3333	44			Qhd-PAxP.ipbb-7A	RAC875_c63889_486	7A	43.8324	Paragon	B	B
	KRIAPI (Almaty)	61.8333	61.1667			Qhd-PAxP.ipbb-7B	Ex_c101666_634	7B	32.2946	Pam Az	A	A
SMD, days	NKAES (Petropavlovsk)	45.3333	43.6667			Qhd-PAxP.ipbb-7D	BS00066128_51	7D	76.5075	Pam Az	A	A
	RPCGF (Shortandy)	57.3333	56			Qsmd-PAxP.ipbb-1A	IAAV6100	1A	92.5124	Paragon	B	A
	KRIAPI (Almaty)	35	35.6667			Qsmd-PAxP.ipbb-5D	BS00064359_51	5D	66.9925	Pam Az	B	A
PH, cm	NKAES (Petropavlovsk)	77	89.75			Qsmd-PAxP.ipbb-6A	BS00035056_51	6A	24.3851	Pam Az	A	B
	RPCGF (Shortandy)	60.6667	62.3333			Qph-PAxP.ipbb-2B.1	RAC875_s109189_188	2B	80.5803	Paragon	B	B
	KRIAPI (Almaty)	99.2556	105.089			Qph-PAxP.ipbb-2B.2	wsnp_JD_rep_c67103_42432235	2B	92.0402	Paragon	B	B
SL, cm	NKAES (Petropavlovsk)	10.175	10.7			Qph-PAxP.ipbb-2B.3	IAAV283	2B	104.515	Paragon	B	B
	RPCGF (Shortandy)	8.53333	10.2667			Qph-PAxP.ipbb-5A.1	wsnp_Ku_c15816_24541162	5A	76.8266	Pam Az	B	B
	KRIAPI (Almaty)	11.7694	12.2889			Qph-PAxP.ipbb-5A.2	Kukri_rep_c70839_205	5A	96.5761	Pam Az	A	B
NPS, pcs	NKAES (Petropavlovsk)	2.65	2.335			Qph-PAxP.ipbb-6A	Kukri_c33967_97	6A	61.3264	Pam Az	B	A
	RPCGF (Shortandy)	1.11966	2.21977			Qph-PAxP.ipbb-7A	BS00010282_51	7A	52.4567	Paragon	B	B
	KRIAPI (Almaty)	5.30556	3.96667			Qph-PAxP.ipbb-7B	BobWhite_c44404_312	7B	28.5376	Pam Az	A	A
NKS, pcs	NKAES (Petropavlovsk)	41.315	35.83			Qsl-PAxP.ipbb-4A	wsnp_Ex_c55245_57821568	4A	35.9347	Paragon	A	B
	RPCGF (Shortandy)	39.5333	35.4			Qsl-PAxP.ipbb-4B	Kukri_c93922_206	4B	85.3433	Pam Az	A	A
	KRIAPI (Almaty)	54.6056	48.9056			Qsl-PAxP.ipbb-5A.1	wsnp_Ex_c15046_23216392	5A	41.9116	Paragon	B	B
TKW, g	NKAES (Petropavlovsk)	34.35	40.1167			Qsl-PAxP.ipbb-5A.2	BS00083514_51	5A	87.1748	Pam Az	B	B
	RPCGF (Shortandy)	32.9712	38.9916			Qsl-PAxP.ipbb-5B	Ku_c13342_414	5B	49.2632	Pam Az	A	B
	KRIAPI (Almaty)	27.4028	31.5972			Qsl-PAxP.ipbb-7D	wsnp_Ku_c27286_37236472	7D	62.3489	Paragon	B	B
YM2, g	NKAES (Petropavlovsk)	301.15	305.3			Qnps-PAxP.ipbb-1A.1	Tdurum_contig29484_628	1A	17.3203	Paragon	A	B
	RPCGF (Shortandy)	303.84	340.46			Qnps-PAxP.ipbb-1A.2	Kukri_c45512_193	1A	71.1603	Paragon//Pam Az	A	A
	KRIAPI (Almaty)	738.806	757.627			Qnps-PAxP.ipbb-2D	TA001366-0072	2D	78.8744	Pam Az	B	B
						Qnps-PAxP.ipbb-5A.4	wsnp_Ex_c31672_40435001	5A	145.757	Paragon	A	B
						Qnps-PAxP.ipbb-5A.1	BS00079189_51	5A	29.7231	Pam Az	B	B
						Qnps-PAxP.ipbb-5A.2	TA001494-0485	5A	49.0711	Paragon//Pam Az	A	B
						Qnps-PAxP.ipbb-5A.3	IACX3911	5A	93.5236	Pam Az	A	B
						Qnks-PAxP.ipbb-2D.1	TA001604-0648	2D	5.2938	Paragon	A	A
						Qnks-PAxP.ipbb-2D.2	D_contig14237_449	2D	156.546	Paragon	B	B
						Qnks-PAxP.ipbb-3B.4	CAP12_c3551_85	3B	128.535	Pam Az	A	B
						Qnks-PAxP.ipbb-3B.1	Ra_c17608_960	3B	19.1575	Pam Az	B	B
						Qnks-PAxP.ipbb-3B.2	BS00018764_51	3B	36.4689	Pam Az	B	B
						Qnks-PAxP.ipbb-3B.3	RFL_Contig29_1062	3B	61.286	Pam Az	B	B
						Qnks-PAxP.ipbb-4B	Kukri_rep_c101259_81	4B	91.4028	Pam Az	B	A
						Qnks-PAxP.ipbb-5A	BS00083514_51	5A	87.1748	Pam Az	B	B
						Qnks-PAxP.ipbb-6B	CAP11_c7959_386	6B	6.7166	Paragon	A	A
						Qnks-PAxP.ipbb-6D	wsnp_Ku_c19587_29102203	6D	1.1237	Paragon	B	B
						Qnks-PAxP.ipbb-7A	IAAV6957	7A	111.773	Pam Az	H	B
						Qtkw-PAxP.ipbb-1A	BS00023114_51	1A	87.832	Pam Az	B	A
						Qtkw-PAxP.ipbb-2B.1	BS00041323_51	2B	76.5946	Pam Az/Paragon	B	B
						Qtkw-PAxP.ipbb-2B.2	CAP12_c2472_60	2B	94.3392	Paragon	B	B
						Qtkw-PAxP.ipbb-4B.1	RAC875_c14085_1709	4B	68.6048	Paragon	A	A
						Qtkw-PAxP.ipbb-4B.2	Kukri_c93922_206	4B	85.3433	Pam Az	A	A
						Qtkw-PAxP.ipbb-6A	IAAV4068	6A	69.1298	Pam Az	B	A
						QYM2-PAxP.ipbb-2A	CAP11_c2293_200	2A	42.0363	Paragon	A	A
						QYM2-PAxP.ipbb-2D.1	TA010191-1338	2D	3.6208	Pam Az	A	A
						QYM2-PAxP.ipbb-2D.2	D_contig14237_449	2D	156.546	Paragon	B	B
						QYM2-PAxP.ipbb-3A	Ku_c19285_555	3A	79.5237	Paragon	B	A
						QYM2-PAxP.ipbb-4A	Ra_c74035_586	4A	24.3922	Paragon	A	B
						QYM2-PAxP.ipbb-5A.1	IAAV2776	5A	18.7298	Pam Az	B	A
						QYM2-PAxP.ipbb-5A.2	Excalibur_rep_c90275_262	5A	36.41	Paragon/ Pam Az	B	B
						QYM2-PAxP.ipbb-7B	BS00081132_51	7B	23.1465	Pam Az	A	A
											28	32
